# Supplementary material for: DNA methylation signature in blood mirrors successful weight-loss during lifestyle interventions: the CENTRAL trial
Source: Genome Med. 2020 Nov 16;12:97. doi: 10.1186/s13073-020-00794-7 (PMC7670623; doi:10.1186/s13073-020-00794-7)
Supplement: Supplementary file 2 — Additional file 2: Supplementary Tables S1-S10. Table S1. Full list of discriminating DMRs (responder vs. non-responder) - T0. Table S2. Full list of discriminating DMRs (responder vs. non-responder) - T18. Table S3. Full list of discriminating DMRs (responder vs. non-responder) – from combined datasets T0 and T18. Table S4. Candidate genes from GWAS and methylation differences in adipose tissue. Table S5. Gene ontology enrichment analysis. Table S6. Full list of intervention specific CpGs. Table S7. Full list of intervention specific DMRs. Table S8. Full list of EWAS CpGs for weight-change. Table S9. Phenotype associations for CpGs from baseline EWAS. Table S10. Phenotype associations for CpGs from DMRs (responder vs. non-responder). [file 13073_2020_794_MOESM2_ESM.xlsx]

## Sheet: Table S1
Table S1: Full list of discriminating DMRs (responder vs. non-responder) - T0
location	ProbeIDs	adj.P	deltaM	probes/DMR	2D-KS_p-value	SNPprobes	cross-reactive_probes	genes	probes/gene
chr10:134150449-134150761	cg24214699,cg21370255,cg10530568,cg22586726,cg25076597,cg02535060,cg03330181,cg05951994	0.0033	-0.076539	8	6.8e-09	0	0	LRRC27	81
chr6:49681176-49681775	cg14997592,cg04595372,cg25390787,cg26715042,cg08942800,cg01076129,cg15509430,cg12440062,cg17731305,cg21710255,cg01706515	0.015	0.090312	11	3.1e-08	0	0	CRISP2	14
chr13:21919004-21919171	cg24653167,cg20631839,cg18331106	0.47	-0.085051	3	9.8e-07	0	3	LINC00539	39
chr14:75800939-75801092	cg16487097,cg16379283,cg05661694	1	-0.032289	3	3.7e-06	0	0	.
chr12:312735-312754	cg12790145,cg25329573,cg02780130	1	0.254896	3	1.3e-05	0	0	RP11-283I3.2,SLC6A12	9.59
chr17:33759510-33760309	cg03251655,cg19963856,cg24470734,cg11346248,cg21697381,cg19566405,cg05174890,cg10431713,cg20354552,cg00492719,cg08330690,cg10514580	1	0.075764	12	2.3e-05	0	0	SLFN12	22
chr11:27015590-27015809	cg02565993,cg07042914,cg07777008	1	0.071188	3	3.8e-05	0	0	FIBIN	10
chr20:61371016-61371809	cg20159906,cg11182786,cg24235518,cg13213889,cg13292703	1	-0.043121	5	3.9e-05	3	0	NTSR1	38
chr10:106113173-106113271	cg12624829,cg18192222,cg05356308	1	0.055963	3	4e-05	0	0	CCDC147-AS1,CCDC147	10.31
chr19:57742110-57742445	cg25802888,cg08268757,cg19568003,cg26332114,cg14370847,cg19603903,cg23371413,cg06643849,cg25432232,cg22711741	1	0.054927	10	5.5e-05	0	0	AURKC	16
chr12:54541102-54541190	cg05025605,cg23624926,cg14135027	1	-0.118417	3	7.3e-05	0	0	RP11-834C11.11	6
chr6:30039130-30039802	cg23712018,cg00947782,cg03343571,cg13185413,cg06249604,cg20119745,cg20249327,cg15877520,cg13918754,cg09279736,cg07382347,cg13401893,cg12633154,cg16078649,cg10930308,cg02188185,cg26730543,cg24103044	1	-0.117969	18	0.00011	3	0	RNF39	83
chr22:20137435-20138178	cg05968150,cg25840306,cg27351844,cg17474665,cg24515868,cg00951518	1	-0.049852	6	0.00011	2	5	AC006547.14	10
chr1:153234035-153234343	cg08611411,cg21860629,cg11534293	1	0.076921	3	0.00012	0	0	LOR	14
chr15:69323993-69324157	cg20532999,cg17073392,cg09453870	1	0.071766	3	0.00012	0	0	NOX5	59
chr2:113992692-113993143	cg23122642,cg21482265,cg11763394,cg21550016,cg07772999,cg19083407	1	0.08656	6	0.00022	0	0	AC016683.6,PAX8	56.66
chr7:50518348-50518574	cg03731078,cg22303909,cg23111338	1	0.076926	3	0.00034	0	0	FIGNL1	15
chr21:44105263-44106234	cg23590273,cg16784985,cg18975948	1	0.046644	3	0.00034	0	0	PDE9A	88
chr14:93697772-93698417	cg08660994,cg16602316,cg06821828,cg12944343	1	0.059256	4	0.00036	0	1	.
chr18:77905296-77905752	cg13704680,cg05251669,cg19774868,cg16244155,cg20191338,cg06092953,cg12061113,cg13287964	1	-0.091892	8	0.00036	0	1	ADNP2,AC139100.2	25.29
chr15:45571524-45571778	cg23904581,cg09092052,cg17252077,cg16921702,cg23416540	1	0.045199	5	0.00046	0	0	CTD-2651B20.3	21
chr21:15352211-15352642	cg18681837,cg00566515,cg11324748	1	0.114003	3	0.00057	0	3	ANKRD20A11P	19
chr14:24475904-24476479	cg22926554,cg03302811,cg02149323,cg17053590,cg09668244	1	-0.091517	5	0.00063	0	5	.
chr10:29698366-29698463	cg16162391,cg14970695,cg08367083,cg03496709,cg19109608	1	0.062077	5	0.00067	1	0	PTCHD3P1	41
chr20:36149119-36149195	cg22421148,cg22510412,cg03061677,cg00576435,cg18433380	1	-0.040003	4	0.00073	0	0	NNAT,BLCAP	48.125
chr19:33622940-33622960	cg00366190,cg17764715,cg07827796	1	0.065658	3	0.00081	1	0	WDR88	29
chr13:100218550-100219014	cg17910899,cg20066226,cg13752184	1	0.074953	3	0.00082	0	0	.
chr19:58220655-58220774	cg03234186,cg08668790,cg00983956,cg12506930,cg26465391	1	-0.03397	5	0.00085	0	0	ZNF154,ZNF551,AC003006.7	17,40,74
chr13:113296190-113296448	cg12351768,cg08183074,cg00557959,cg15756319	1	-0.059365	4	0.0009	0	0	.
chr5:146831805-146832357	cg05730183,cg04833034,cg08737836,cg18635723,cg18604568	1	-0.047538	5	0.00093	0	0	DPYSL3	66
chr7:5271478-5271546	cg26660312,cg00579868,cg09203501	1	0.075594	3	0.00093	0	0	WIPI2	73
chr1:228756709-228756790	cg10167378,cg16512390,cg18025438	1	0.117207	3	0.00094	0	1	DUSP5P1	24
chr11:6291623-6292512	cg13580265,cg19364351,cg04467334,cg26313599,cg04585209,cg18706028,cg26700447	1	0.063778	7	0.00094	0	0	CCKBR	29
chr12:7781091-7781289	cg10578777,cg14906510,cg25828445	1	0.065298	3	0.00094	0	0	.
chr15:56299378-56299463	cg24530489,cg08306218,cg14121685	1	0.117968	3	0.00094	0	0	CNOT6LP1	5
chr18:7011215-7011389	cg22220710,cg03691722,cg05836043	1	-0.054406	3	0.00094	0	0	LAMA1	51
chr2:132919538-132919866	cg20364988,cg15774040,cg22923398	1	0.036212	3	0.00095	0	2	ANKRD30BL	33
chr7:30635760-30635890	cg21429551,cg03068497,cg16875104	1	0.064081	3	0.00095	0	0	AC005154.6,GARS	46.39
chr17:46681109-46682414	cg00072689,cg15435170,cg01986016,cg20471691,cg17179862,cg03803541,cg05900563,cg14230750,cg16848873,cg05888755,cg10906729,cg18684142,cg04588674,cg19828220	1	0.062499	14	0.00096	0	0	HOXB6,HOXB3,HOXB-AS3	51,208,210
chr4:81118586-81118795	cg26299084,cg10694470,cg27018912,cg05059566,cg06307913	1	0.052426	5	0.0011	0	0	PRDM8	62
chr5:23506736-23507753	cg04362002,cg10589310,cg25336267,cg19837938,cg02444433,cg22603366,cg09166973,cg07011961,cg25472530,cg22079902,cg01667892,cg05179993	1	0.053732	12	0.0011	0	4	PRDM9	15
chr2:114737309-114737731	cg26867680,cg15915602,cg27087112,cg26077729,cg27585222	1	0.04067	5	0.0013	0	0	AC010982.1,AC110769.3	20.11
chr20:55401916-55402744	cg13683550,cg18394120,cg16569525	1	-0.052436	3	0.0014	0	0	.
chr5:27038780-27038837	cg12864235,cg11155432,cg07350977	1	-0.057368	3	0.0015	0	0	CDH9	23
chr20:443630-443654	cg14658867,cg07492518,cg15042888	1	0.031449	3	0.0015	0	0	TBC1D20	27
chr21:47604050-47605175	cg07747299,cg08742575,cg12016809,cg25545878,cg05896524,cg05672835,cg13704590,cg13012494,cg13732083,cg10296238	1	-0.103563	10	0.0016	2	0	AP001468.58,SPATC1L	10.23
chr12:122356314-122356599	cg01765077,cg21171335,cg11867697,cg22618164,cg21016266	1	-0.117285	5	0.0019	0	0	RP11-87C12.2,WDR66	51.5
chr17:170873-172160	cg15809575,cg12742645,cg01282504,cg17780867,cg21909751,cg05231332,cg18290190,cg01760178,cg21518212,cg26730036	1	0.042406	10	0.002	0	0	RP11-1260E13.1,RPH3AL	14.24
chr7:187252-187340	cg02820566,cg20865618,cg25980689	1	-0.086786	3	0.0021	1	0	AC093627.12	35
chr16:1121691-1121728	cg14083925,cg27392217,cg01404373	1	0.057414	3	0.0022	0	0	SSTR5-AS1,SSTR5	55.39
chr5:149379516-149379727	cg26588194,cg19884619,cg25441645	1	0.058088	3	0.0023	0	0	TIGD6,HMGXB3	30.46
chr5:162864266-162865237	cg08970050,cg17381847,cg01893681,cg20477999,cg10852661,cg18020381,cg06646650,cg12879386,cg04232649,cg17876308,cg21592278,cg04084172,cg06625838,cg05540047	1	0.032725	14	0.0024	0	0	CCNG1,RP11-541P9.3	25.37
chr6:160241103-160241520	cg27247736,cg17481235,cg21457401	1	-0.061891	3	0.0024	0	0	PNLDC1	30
chr8:143545234-143545479	cg04134031,cg21210789,cg03924566	1	-0.033107	3	0.0024	0	0	BAI1	117
chr16:88766499-88766539	cg07268595,cg26315894,cg19396978	1	0.04448	3	0.0024	0	0	RNF166	48
chr3:51740620-51740897	cg22739025,cg25693132,cg21899500,cg00664406,cg04453050	1	-0.045685	5	0.0025	0	0	GRM2	35
chr14:19109061-19110298	cg23922973,cg01588177,cg20517615,cg05195083,cg05325567	1	0.034333	5	0.0026	0	5	RP11-754I20.1	6
chr19:21264894-21265422	cg01483656,cg19882830,cg17751872,cg01326874,cg15174294,cg06238316,cg09352518	1	0.147082	7	0.0029	0	4	ZNF714	14
chr11:67417956-67418366	cg11096993,cg01240599,cg04565008,cg06148175,cg00350199,cg25835179,cg09296957,cg12355172,cg04986336,cg23130075	1	-0.068764	10	0.0031	1	0	ACY3	20
chr7:51539321-51539584	cg06593753,cg07537562,cg08767820	1	0.073934	3	0.0033	0	0	.
chr5:110062341-110062838	cg23279021,cg17248924,cg11641395,cg06429214,cg25259944,cg20963261,cg22429640,cg19398821,cg27037608,cg17946588,cg10597099,cg19526166,cg26583412,cg06414816	1	0.051456	14	0.0034	2	0	TMEM232	63
chr15:31515748-31515853	cg25556225,cg27438152,cg10854819	1	0.053181	3	0.0036	0	0	RP11-16E12.1,RP11-16E12.2	19.17
chr11:111847890-111848165	cg15925695,cg21169203,cg15050390,cg20816889,cg17446654	1	-0.054049	5	0.0037	0	0	DIXDC1	69
chr3:159557491-159559192	cg27400205,cg25705519,cg09345606,cg00188627,cg15180789,cg10088405,cg23553912,cg13447038,cg12020251	1	0.040395	9	0.0038	0	0	SCHIP1,IQCJ-SCHIP1	37.166
chr10:18430142-18430613	cg26272270,cg03634479,cg16726719	1	-0.055311	3	0.0038	0	0	CACNB2	109
chr3:46792355-46792463	cg08381504,cg09571950,cg23231268	1	0.058379	3	0.0039	0	0	PRSS50,PRSS45	63.37
chr6:10495221-10495436	cg13856384,cg12634245,cg20139336	1	-0.053043	3	0.0039	0	0	GCNT2	77
chr2:43327935-43328537	cg03125400,cg00881696,cg05672223,cg04981619,cg14706297,cg24601559	1	0.039147	6	0.004	1	0	AC093609.1	13
chr1:110254601-110255097	cg02797771,cg25593510,cg25520068,cg05376982,cg20803293,cg25210835,cg24467349,cg12858902,cg14377951,cg23719124,cg22864244	1	0.055658	11	0.0041	1	6	GSTM5	72
chr20:11870750-11870818	cg00697907,cg00592643,cg24562149	1	0.061781	3	0.0043	0	0	BTBD3	45
chr19:55476540-55478263	cg01717586,cg20067405,cg15031253,cg13425888,cg25651476,cg00686667,cg13093842,cg04887076,cg17760849,cg19689876,cg24040502,cg20995778	1	0.074442	12	0.0046	0	10	NLRP2,NLRP7	36.35
chr4:174422440-174422909	cg00699219,cg04840702,cg08125755	1	0.046057	3	0.0048	0	0	.
chr5:1887294-1887311	cg06140361,cg07565505,cg18561688,cg12039072,cg25614907	1	-0.031392	5	0.0049	0	0	IRX4,CTD-2194D22.4	59.34
chr1:225117387-225117465	cg25379026,cg18701048,cg03940634,cg10174867,cg03199058	1	-0.050961	5	0.005	0	0	DNAH14	29
chr10:13481844-13481945	cg12390516,cg19411738,cg24686497	1	-0.068725	3	0.0051	1	0	BEND7	78
chr8:88056655-88056686	cg27224143,cg05184101,cg12533940	1	0.030284	3	0.0054	0	0	CNBD1	25
chr9:126773877-126773888	cg10755973,cg04456155,cg06177522	1	-0.030583	3	0.0054	0	0	LHX2	46
chr11:68658381-68658970	cg21862992,cg06112835,cg21963583,cg00242965	1	-0.101064	4	0.0054	0	2	MRPL21	28
chr12:54558272-54558300	cg19905308,cg04142929,cg20002756	1	-0.112708	3	0.0054	0	0	RP11-834C11.10,RP11-834C11.8	11.15
chr16:56995811-56995857	cg09889350,cg12564453,cg16660091	1	0.03183	3	0.0054	0	0	CETP	18
chr21:40361752-40362230	cg02254947,cg02515900,cg20721960	1	-0.061383	3	0.0055	0	0	AF064858.8	12
chr2:219738224-219738530	cg22587479,cg00011225,cg14639163	1	-0.079265	3	0.0056	0	0	WNT6	30
chr12:131118424-131118655	cg06777732,cg08164151,cg14140673	1	0.110062	3	0.0056	0	0	RP11-662M24.2,RIMBP2	95.277
chr17:154418-154672	cg11940040,cg10440639,cg23246911	1	0.14331	3	0.0056	0	0	RPH3AL	240
chr1:149908751-149908782	cg17353890,cg26645700,cg24620905	1	0.046079	3	0.0057	0	0	MTMR11	21
chr4:81111505-81111986	cg03404272,cg06440348,cg21082141	1	0.031057	3	0.0057	0	0	RP11-377G16.2,PRDM8	28.62
chr7:31439-31498	cg05107246,cg15535638,cg20044143	1	0.062959	3	0.0057	0	3	.
chr11:32449448-32449729	cg04096767,cg12006284,cg24106790	1	0.035697	3	0.0057	0	0	WT1	84
chr16:85368680-85368974	cg02016305,cg10066698,cg02418439	1	-0.077495	3	0.0057	1	0	.
chr17:48585214-48585271	cg11440486,cg20111217,cg00901687	1	-0.133589	3	0.0057	0	0	RP11-94C24.6,MYCBPAP	17.32
chr18:10702329-10702720	cg25164787,cg19844266,cg14535707	1	-0.083463	3	0.0057	2	0	PIEZO2	112
chr2:183943173-183943939	cg09632303,cg26744578,cg12925933,cg27029635,cg11601112,cg08641796,cg12484193,cg20443138,cg20721750,cg21364150,cg02551347,cg16653432,cg02561726	1	0.038222	13	0.0064	0	0	DUSP19	18
chr12:54324558-54324896	cg17410650,cg25024717,cg06087619	1	-0.033381	3	0.0066	0	0	.
chr2:110969639-110970430	cg02169857,cg08570243,cg03250220,cg09068086,cg07888738,cg21885427	1	0.055506	6	0.007	0	0	LINC00116	12
chr18:19756580-19758222	cg27592331,cg12615165,cg13427880,cg02360939,cg15424989,cg26987699,cg14880184	1	-0.050347	7	0.0073	0	0	RP11-627G18.2,GATA6	7.41
chr2:43903468-43903808	cg09325404,cg11267669,cg14230606,cg09132607,cg02111748,cg18817560,cg13324389	1	0.040676	7	0.0074	2	0	AC011242.6,PLEKHH2	11.37
chr6:28601269-28602514	cg07017437,cg25653641,cg22572476,cg19488431,cg27535677,cg22497095,cg26865747,cg03759229,cg13565129,cg14654363,cg00990380,cg12763978,cg09490294	1	0.04215	13	0.008	0	1	RP11-373N24.2	27
chr14:36973202-36973484	cg08086724,cg05134015,cg13209481	1	-0.043389	3	0.0084	0	0	RP11-896J10.3,SFTA3	70.4
chr5:141348200-141348280	cg08665853,cg21256257,cg15812759,cg24777028,cg23743252	1	-0.043872	5	0.0085	0	0	PCDH12,RNF14	40.43
chr7:134464121-134464243	cg16253634,cg24956866,cg14009688	1	0.05035	3	0.0085	0	0	CALD1	102
chr16:420228-420256	cg08923669,cg17422692,cg08296601	1	0.077997	3	0.0085	0	0	MRPL28	18
chr18:32847638-32847790	cg01753936,cg00487232,cg23624808	1	0.031443	3	0.0085	0	0	ZSCAN30	36
chr2:181845409-181845503	cg18455490,cg00949554,cg04807694	1	0.073575	3	0.0086	0	3	AC104076.3,UBE2E3	8.43
chr7:72972277-72972507	cg05386606,cg27441048,cg05555294,cg03572677,cg14527128	1	0.037924	5	0.0086	0	0	BCL7B	26
chr10:135122228-135122238	cg19126377,cg15220194,cg13178511	1	0.052414	3	0.0086	3	0	TUBGCP2,ZNF511	107.98
chr12:130707330-130707408	cg01016191,cg03897452,cg20736492	1	0.069989	3	0.0086	0	0	.
chr19:54945957-54946219	cg24365804,cg13123480,cg18593111,cg11788633,cg02086964	1	0.061518	5	0.0086	0	0	AC008746.3,TTYH1	9.35
chr11:1773016-1773220	cg04430031,cg23135809,cg23776574	1	0.044437	3	0.0092	0	0	IFITM10,RP11-295K3.1	31.47
chr20:62327966-62328428	cg23773946,cg14697761,cg07620230,cg24354818,cg16702083	1	0.08241	5	0.0094	1	0	TNFRSF6B,RTEL1,RTEL1-TNFRSF6B	9,65,57
chr11:126872001-126872864	cg19299201,cg17534999,cg06504925,cg16652303,cg17273911	1	-0.059697	5	0.01	0	0	KIRREL3-AS3,AP002833.1,KIRREL3	15,11,185
chr17:405176-406502	cg25882591,cg18727120,cg00416177,cg04370829,cg16835101,cg20547929,cg00430613,cg01214346	1	0.044608	8	0.01	0	0	RP5-1029F21.3	12
chr4:186732835-186733061	cg12309668,cg04392082,cg02790305,cg26785346,cg01933073,cg18342119,cg13921444,cg04348265	1	-0.057587	8	0.011	0	0	SORBS2	159
chr1:1289804-1289875	cg14270725,cg15386434,cg16006120	1	0.057391	3	0.012	0	0	MXRA8	35
chr1:40025230-40025416	cg11704876,cg22862450,cg15057250	1	-0.034594	3	0.012	0	0	PPIEL	13
chr2:105853492-105853797	cg22022881,cg27422857,cg26874229,cg22878388	1	0.086794	4	0.012	0	0	.
chr3:42977641-42978319	cg02648562,cg10118419,cg14794247,cg11555493,cg27084712,cg11303738,cg22714811,cg08111629,cg21104412,cg08364654,cg27595003	1	0.039243	11	0.012	0	0	KRBOX1-AS1,KRBOX1,KRBOX1	21,102,102
chr6:27185674-27186200	cg09817162,cg10279314,cg09395805,cg07555084	1	0.060709	4	0.012	0	0	.
chr7:150020267-150020752	cg11026333,cg01270001,cg22893248	1	0.121362	3	0.012	0	0	LRRC61,ACTR3C	31.46
chr9:126135167-126135999	cg02625222,cg11431402,cg15922174	1	-0.051692	3	0.012	0	0	CRB2	28
chr11:85393691-85394070	cg20544552,cg02687418,cg13906860,cg08675941,cg07187133	1	0.045507	5	0.012	0	0	CREBZF	28
chr12:86230091-86230368	cg02569458,cg00310523,cg25456477	1	-0.030058	3	0.012	0	0	RASSF9	13
chr12:132278428-132278511	cg09814354,cg03550075,cg01614703	1	0.051764	3	0.012	0	0	SFSWAP	106
chr17:16593515-16593583	cg07570663,cg25349314,cg04306489	1	0.060825	3	0.012	0	2	CCDC144A,RP11-219A15.1	28.27
chr19:519033-519612	cg06595479,cg21450784,cg21177456	1	0.044499	3	0.012	0	0	TPGS1	24
chr21:47581040-47581559	cg05200811,cg11766577,cg13126279	1	0.086649	3	0.012	0	0	SPATC1L	23
chr1:166459323-166459525	cg09755589,cg17665268,cg22100019	1	-0.041779	3	0.013	0	2	RP11-276E17.2	5
chr2:128146129-128146475	cg16051415,cg09760422,cg24837355	1	0.05577	3	0.013	0	0	AC068282.3,MAP3K2	12.26
chr3:186490342-186490729	cg12435415,cg22984571,cg21530419	1	0.039839	3	0.013	0	0	RNU6-1105P,RP11-573D15.6	6.6
chr7:2802940-2802966	cg24648384,cg05793240,cg20884522	1	0.094343	3	0.013	1	0	AMZ1,GNA12	162.132
chr7:80548454-80548696	cg03823904,cg12850675,cg11051843	1	-0.05006	3	0.013	0	0	SEMA3C	57
chr8:104383713-104383725	cg04219247,cg20447655,cg20392240	1	0.041456	3	0.013	0	0	CTHRC1	21
chr9:4147224-4147976	cg13563329,cg08551019,cg02763716	1	0.040093	3	0.013	0	0	GLIS3	121
chr10:51572201-51572304	cg25794402,cg22758697,cg07588964	1	0.051957	3	0.013	0	0	NCOA4	39
chr11:47575257-47575284	cg08721974,cg19460817,cg25953688	1	-0.03116	3	0.013	0	0	CELF1	75
chr18:43608103-43608510	cg07773272,cg05513069,cg05986195	1	-0.03593	3	0.013	1	1	RP11-8H2.1,PSTPIP2	6.43
chr21:44876602-44876688	cg02544658,cg00362657,cg27484412	1	-0.046727	3	0.013	0	0	.
chr2:24397785-24397872	cg01343041,cg18587476,cg06482857,cg17277199,cg21778743	1	0.053698	5	0.015	0	0	AC008073.7,FAM228A,RP11-507M3.1	19,20,41
chr5:179740186-179741121	cg14794799,cg23221052,cg13944838,cg23248424,cg02891314	1	0.057973	5	0.015	0	0	GFPT2	60
chr1:63249195-63249214	cg09756865,cg24082680,cg22683036,cg06366791	1	0.046742	4	0.016	0	0	ATG4C	17
chr2:110372873-110373003	cg17866732,cg06665305,cg03552103	1	-0.036672	3	0.016	0	0	SOWAHC,SEPT10	22.37
chr3:51740954-51741474	cg26079664,cg12934382,cg00303541,cg21213853	1	-0.063862	4	0.016	1	0	GRM2	35
chr5:150284614-150284635	cg26486466,cg04032578,cg12777992	1	0.030068	3	0.016	0	0	ZNF300	19
chr17:15686292-15686474	cg14599729,cg11343211,cg08790676,cg02132284	1	0.048259	4	0.016	1	0	IL6STP1	6
chr7:32339081-32339137	cg08754025,cg19663246,cg09372060	1	0.041257	3	0.017	0	0	PDE1C	114
chr7:44104582-44105435	cg21448875,cg07075347,cg16627090,cg03470754,cg12631925,cg23616741	1	0.038275	5	0.017	1	0	AC017116.11,DBNL,PGAM2	11,51,16
chr8:1713003-1713013	cg11322655,cg26702323,cg26975524	1	0.039808	3	0.017	0	0	CTD-2336O2.1,CLN8	16.62
chr10:134915606-134915740	cg08485958,cg21136802,cg07907795	1	0.036589	3	0.017	0	0	GPR123	147
chr3:39448942-39448962	cg09566177,cg00063111,cg17616205	1	0.033943	3	0.018	0	0	SNORA6,RPSA	9.28
chr1:19973880-19974177	cg18045201,cg03950225,cg14714346	1	0.047855	3	0.019	0	1	NBL1,MINOS1-NBL1	43.7
chr1:223566703-223566795	cg02352904,cg27202708,cg05333568	1	0.037966	3	0.019	0	0	C1orf65	14
chr6:291880-292330	cg21548813,cg03395511,cg18110333	1	0.082385	3	0.019	0	0	DUSP22	50
chr14:24438775-24439193	cg01216060,cg18659398,cg16779295,cg02358448,cg14214739,cg24638335,cg02679294	1	-0.070901	7	0.019	0	6	DHRS4-AS1,DHRS4L2	2.35
chr19:1174417-1174664	cg12412751,cg10632600,cg07559992	1	0.036817	3	0.019	1	0	SBNO2	101
chr22:17229579-17229661	cg04213959,cg23155459,cg03067190	1	0.03035	3	0.019	0	2	AC005301.8	5
chr5:140475650-140476730	cg00979288,cg19503030,cg14500258	1	-0.03084	3	0.02	0	3	PCDHB2	18
chr5:140501533-140501662	cg02462812,cg08626876,cg03340754	1	-0.03892	3	0.02	0	0	PCDHB4	23
chr6:28226883-28227128	cg21251018,cg00765128,cg18979916,cg13997680,cg17384889,cg18694169,cg10253847,cg01031101,cg09523275,cg18675097	1	0.050559	10	0.02	0	0	NKAPL,ZKSCAN4	19.4
chr1:19600469-19601027	cg20677058,cg13935437,cg18202521,cg12798157,cg11376198,cg09045262,cg07162162	1	-0.034675	7	0.021	1	0	AKR7L	13
chr10:54538303-54538683	cg17334937,cg03716984,cg07745596	1	0.056905	3	0.021	0	0	.
chr10:127407604-127407769	cg19049077,cg26517151,cg08890360	1	0.056557	3	0.021	0	0	RP11-383C5.5,C10orf137,RP11-383C5.4	17,35,25
chr1:16163477-16163968	cg24735235,cg04889800,cg19025461,cg01429859,cg25980637	1	0.051647	5	0.022	0	0	RP11-169K16.9	35
chr1:244395113-244395353	cg26436731,cg18379829,cg05248971	1	0.060449	3	0.022	0	0	.
chr3:124931954-124932003	cg14391622,cg25611254,cg25260865	1	-0.032464	3	0.022	0	0	SLC12A8	92
chr8:94508148-94508435	cg15623175,cg03186975,cg17118836	1	0.059153	3	0.022	0	0	LINC00535	99
chr19:36485280-36485361	cg26643967,cg19389372,cg04579398	1	0.049906	3	0.022	0	0	SDHAF1	14
chr5:140530307-140530468	cg04743250,cg23247945,cg06013769	1	-0.056414	3	0.023	0	0	PCDHB6	22
chr16:54228321-54228448	cg27520536,cg03687532,cg07506749	1	0.046288	3	0.023	0	0	.
chr19:667452-667809	cg23874611,cg14186697,cg23433318,cg05581212,cg12106403	1	0.046541	5	0.023	1	1	AC004156.3	19
chr1:2106363-2106621	cg27264462,cg23648809,cg02393699	1	-0.034647	3	0.024	0	0	PRKCZ	301
chr5:3326537-3326732	cg04675246,cg16185299,cg18443437	1	0.046344	3	0.024	1	0	.
chr5:180237006-180237216	cg06840659,cg13724780,cg11935018	1	0.040665	3	0.024	1	0	MGAT1	66
chr10:115860278-115860311	cg20703003,cg16734433,cg24756403	1	0.053775	3	0.024	0	0	.
chr11:32417884-32417914	cg08540275,cg20641425,cg00806185	1	-0.054168	3	0.024	0	0	WT1	84
chr19:10172823-10172900	cg07749412,cg22597210,cg02505002	1	0.104146	3	0.024	0	0	C3P1	21
chrX:72666401-72666935	cg11290635,cg21306843,cg23996156,cg19376305,cg12006363	1	-0.042461	5	0.024	0	0	CDX4	16
chr7:150020853-150020962	cg21516287,cg02639123,cg02119840,cg11347411,cg11740103,cg25183474	1	0.04054	6	0.025	0	0	LRRC61,ACTR3C	31.46
chr10:135160906-135161048	cg03743584,cg15549126,cg10742801	1	-0.033101	3	0.025	0	0	RP11-122K13.7,PRAP1,ZNF511	17,17,98
chr12:31272110-31272120	cg17292337,cg10317314,cg14687298	1	-0.119447	3	0.025	0	0	RP11-551L14.1	18
chr20:5485142-5485295	cg21235746,cg03287299,cg25958766,cg20295248,cg16763089,cg10831901	1	0.066071	6	0.025	0	0	LINC00654	11
chr2:43903840-43904012	cg20563666,cg14454477,cg08726338	1	0.072827	3	0.026	0	0	AC011242.6,PLEKHH2	11.37
chr3:132757085-132757103	cg06288251,cg18115215,cg24198558	1	-0.032832	3	0.026	0	0	RP11-469L4.1,TMEM108	20.69
chr4:190936278-190936290	cg12780324,cg09021471,cg05081498	1	-0.037966	3	0.026	0	3	RNA5SP174	5
chr6:30079263-30079308	cg21809927,cg08222513,cg11100081	1	-0.033239	3	0.026	1	0	TRIM31,TRIM31-AS1	82.58
chr7:156400709-156400785	cg16561657,cg18584424,cg12167907	1	-0.068975	3	0.026	0	0	LINC01006	104
chr9:90112617-90113282	cg26490957,cg20401521,cg03763620	1	-0.039599	3	0.026	0	0	DAPK1	93
chr10:18688394-18689949	cg23638399,cg08550689,cg03587042,cg18243536,cg07262635,cg25334928,cg25327888,cg12289251,cg24128066,cg16108246,cg14839147,cg05351658,cg05720640	1	0.039117	13	0.026	0	0	CACNB2	109
chr10:99338054-99338189	cg13994504,cg27469738,cg25604594	1	0.034315	3	0.026	0	0	ANKRD2	24
chr10:105438006-105438069	cg04788957,cg21699381,cg19261727	1	-0.033675	3	0.026	0	0	SH3PXD2A	196
chr11:120856644-120856919	cg18247436,cg15174564,cg24255125	1	-0.065328	3	0.026	0	0	GRIK4	189
chr13:72441144-72441185	cg01311064,cg16183813,cg26413827	1	-0.035693	3	0.026	0	0	DACH1	50
chr18:74799248-74799501	cg17199181,cg13572782,cg11598403	1	0.075037	3	0.026	0	0	MBP	151
chr1:20501556-20502235	cg04605617,cg21152304,cg01063509	1	-0.033008	3	0.027	0	0	PLA2G2C	15
chr2:242928536-242929280	cg00576474,cg00080068,cg08839596	1	-0.050334	3	0.027	0	0	AC131097.3	242
chr4:124313-124345	cg22831726,cg12717203,cg21149944	1	0.046413	3	0.027	0	0	Z95704.5,ZNF718	10.19
chr5:151304815-151305112	cg25352328,cg11955641,cg11200917	1	0.052728	3	0.027	0	0	GLRA1	30
chr6:37617862-37618010	cg20053110,cg24796644,cg26720545	1	-0.103446	3	0.027	0	0	MDGA1	59
chr6:52441886-52442345	cg26913710,cg26552789,cg17216600	1	0.0391	3	0.027	1	0	TRAM2-AS1,TRAM2	13.48
chr6:109767805-109767844	cg13718616,cg13479685,cg11903855	1	-0.030432	3	0.027	1	0	MICAL1	42
chr6:139012990-139013147	cg06864789,cg25399239,cg18136963	1	-0.186995	3	0.027	0	0	RP11-390P2.4,NHSL1	14.101
chr7:26896338-26897715	cg16187319,cg20747577,cg11497410,cg07473340,cg12140851,cg03730533,cg10180281	1	0.037955	7	0.027	0	0	SKAP2	54
chr7:27253519-27253835	cg02063817,cg05756918,cg12187687	1	0.054115	3	0.027	0	0	.
chr8:674432-674561	cg17179911,cg21650737,cg27048067	1	0.092449	3	0.027	0	0	ERICH1	194
chr10:21462741-21462767	cg21561038,cg00822753,cg07584767	1	-0.038177	3	0.027	0	0	NEBL-AS1,NEBL	17.9
chr10:114709624-114709761	cg20023578,cg07128799,cg10607059	1	-0.06573	3	0.027	0	0	TCF7L2	149
chr10:119302048-119302063	cg25987923,cg17307442,cg05783915	1	-0.032854	3	0.027	0	0	EMX2,EMX2OS	45.91
chr11:41481495-41481892	cg15681577,cg08072402,cg24638253,cg11382417,cg07895523	1	0.035584	5	0.027	0	0	LRRC4C	87
chr11:93822020-93822185	cg01091143,cg02814482,cg19970121	1	0.03495	3	0.027	0	0	HEPHL1	23
chr16:53407676-53407809	cg10144400,cg04653913,cg02380802	1	0.069911	3	0.027	0	0	RP11-44F14.1,RP11-44F14.2	14.18
chr20:57427554-57427651	cg14564778,cg01817393,cg02890368	1	0.052877	3	0.027	0	0	GNAS	213
chrX:100740419-100740440	cg20085077,cg02800016,cg12452512	1	-0.06942	3	0.027	0	3	ARMCX4	27
chr9:130954398-130955437	cg15572469,cg10061204,cg10071929,cg13642260,cg09976142	1	0.047622	5	0.028	0	0	CIZ1	42
chr6:151411708-151412380	cg01354656,cg26774205,cg11579907,cg10395519,cg25955968	1	-0.036467	5	0.029	0	2	MTHFD1L,RP1-292B18.4	111.38
chr8:19459670-19460244	cg15232539,cg17470251,cg05800416,cg06386478,cg19895047,cg26286961,cg04066265	1	0.037064	7	0.029	1	0	CSGALNACT1	139
chr1:86044101-86044231	cg24724587,cg05690441,cg10593400,cg17108141	1	0.033889	4	0.03	0	0	RP11-290M5.4,DDAH1	7.89
chr1:208425578-208426488	cg12895728,cg11318983,cg06191042,cg05566802	1	-0.037929	4	0.03	1	0	.
chr8:121137732-121138233	cg23158731,cg26626663,cg12065840,cg23586322	1	-0.035687	4	0.03	0	0	COL14A1	52
chr16:34378067-34378805	cg01947695,cg08538252,cg02367256,cg06745229	1	0.033493	4	0.03	0	1	RP11-244B22.11,RP11-244B22.12	7.3
chr2:175199644-175199695	cg14459130,cg03181248,cg17964510	1	-0.042565	3	0.035	1	0	SP9	24
chrX:75005026-75005088	cg20648827,cg27539023,cg05152459	1	0.05774	3	0.035	0	0	MAGEE2	10
chr6:30070072-30070343	cg18580274,cg15384453,cg14747086,cg19178742,cg13831136	1	0.030684	5	0.036	0	0	.
chr2:176121916-176121928	cg01823663,cg11416274,cg19559372	1	0.030905	3	0.037	0	0	AC096649.3	24
chr3:134092606-134092716	cg13234063,cg13041467,cg08115510	1	0.034864	3	0.037	0	0	AMOTL2	44
chr4:81111175-81111394	cg27111250,cg10129063,cg27639662	1	0.068755	3	0.037	0	0	RP11-377G16.2,PRDM8	28.62
chr5:135415188-135416614	cg00308130,cg15837280,cg07158503,cg04515200,cg13581155,cg11978884,cg11608150,cg06478886,cg04481923,cg18678645,cg06536614,cg25340688,cg26896946,cg00124993,cg08745965,cg18797653	1	-0.051799	16	0.037	0	0	VTRNA2-1	8
chr7:855004-855053	cg10666140,cg05155812,cg23108435	1	0.036481	3	0.037	0	2	SUN1	176
chr8:93522097-93522272	cg07945197,cg21542345,cg24018262	1	0.042476	3	0.037	0	0	RP11-587H10.1	7
chr2:114033358-114033582	cg25243455,cg06675538,cg01577475	1	-0.064488	3	0.038	0	0	AC016683.6,PAX8	56.66
chr6:147124984-147124997	cg11637682,cg04325960,cg09639631,cg00004963	1	-0.033247	3	0.038	0	0	KATNBL1P6,ADGB	9.42
chr7:4456309-4456593	cg21379460,cg06297367,cg04153130,cg20778547,cg11835459	1	0.051444	5	0.038	0	0	.
chr8:145639035-145639182	cg22088683,cg21788897,cg14228592	1	0.083654	3	0.038	0	0	SLC39A4	33
chr10:7517763-7517834	cg03015498,cg06691250,cg18943588	1	-0.03041	3	0.038	0	0	.
chr10:15038043-15038350	cg00964333,cg16345366,cg23997132	1	0.069722	3	0.038	0	0	.
chr10:134775937-134776051	cg06941527,cg23987897,cg17693826	1	-0.050526	3	0.038	0	0	RP13-137A17.5,RP13-137A17.4	7.38
chr14:75390355-75390402	cg20682842,cg19841496,cg12643970	1	0.047453	3	0.038	0	0	RPS6KL1	32
chr14:97059190-97059350	cg24034005,cg06741112,cg01683794	1	-0.036786	3	0.038	1	0	RP11-433J8.1	12
chr15:22833147-22833976	cg07959104,cg17809365,cg16707215,cg18106434,cg24525828,cg16639637,cg06756169,cg17121412,cg02478956,cg17161804,cg09762043,cg25490410	1	0.048652	12	0.038	0	0	TUBGCP5	26
chr19:29218651-29218775	cg06920399,cg12667521,cg03161606	1	-0.106082	3	0.038	1	0	AC005307.3	36
chr19:45595004-45595812	cg15046935,cg01867142,cg01278903	1	0.032264	3	0.038	0	0	CTB-179K24.3,MARK4,PPP1R37	24,196,50
chr20:44540792-44540828	cg11331678,cg27280575,cg13140564	1	-0.035449	3	0.038	0	0	PLTP	32
chr21:35831994-35832029	cg19521832,cg23908228,cg07321776	1	0.083126	3	0.038	0	0	KCNE1	51
chr22:50753040-50753069	cg05217193,cg06375806,cg20435485	1	0.068738	3	0.038	0	0	XX-C283C717.1,DENND6B	6.21
chr2:74681553-74681806	cg17486538,cg26479323,cg03309722	1	0.036425	3	0.039	0	0	INO80B	31
chr3:10205717-10206255	cg07716603,cg27032569,cg04733838	1	0.032144	3	0.039	0	0	IRAK2	50
chr5:102898221-102898730	cg07666882,cg02976617,cg13665998,cg03073264,cg06105925,cg20279471,cg09166085,cg07655627	1	0.030209	8	0.039	0	0	NUDT12	14
chr8:16461691-16462036	cg20138726,cg13245809,cg05160404	1	-0.031405	3	0.039	0	0	RP11-13N12.2	10
chr12:313095-313379	cg10075163,cg20188212,cg17711915	1	0.079188	3	0.039	1	0	RP11-283I3.2,SLC6A12	9.59
chr12:54520917-54521978	cg11306441,cg16396919,cg25701444	1	-0.036987	3	0.039	1	0	RP11-834C11.5,RP11-834C11.4	29.12
chr13:21900390-21900811	cg13903179,cg04632378,cg19500098,cg00035636,cg10411590	1	0.050838	5	0.039	0	0	LINC00539	39
chr1:40598646-40598780	cg13451356,cg16555417,cg16458866	1	0.039444	3	0.04	1	0	RP11-115D7.3	6
chr1:75590481-75591354	cg01077724,cg01540595,cg01066472,cg00325531	1	0.08755	4	0.04	0	0	RP11-510C10.4	3
chr5:180231183-180231651	cg11850468,cg20399011,cg02039225	1	-0.035294	3	0.04	0	0	MGAT1	66
chr7:5552391-5552473	cg04953783,cg01940713,cg17903019	1	0.042754	3	0.04	1	0	FBXL18	104
chr16:279714-279747	cg21967601,cg26234137,cg27362010	1	0.04706	3	0.04	0	0	Z69890.1,LUC7L	11.26
chr2:220108180-220108497	cg02258512,cg09715285,cg10602248,cg04945312,cg21893210,cg24061197	1	0.047478	6	0.041	0	0	GLB1L	32
chr6:112474715-112475676	cg18565893,cg19368242,cg17190362	1	-0.084809	3	0.041	1	0	RP1-142L7.5,LAMA4	6.62
chr1:109941058-109941119	cg02175308,cg23032129,cg16988986	1	0.030135	3	0.042	0	0	SORT1	34
chr5:54281196-54281734	cg14972155,cg06837426,cg20451680,cg20673840,cg21180956,cg13106512,cg24403549,cg10631947,cg20059697,cg16462183	1	0.039768	10	0.042	0	0	ESM1	25
chr10:32216029-32216312	cg04359828,cg09642378,cg18675610	1	0.031826	3	0.042	0	0	ARHGAP12	55
chr4:1400867-1403503	cg20332645,cg00711088,cg09827139,cg12464561,cg19926630,cg14959580,cg06416060,cg21230162,cg09883255,cg24789180,cg02071572	1	-0.030471	11	0.043	0	0	NKX1-1	18
chr10:42862874-42863595	cg16449687,cg23026554,cg06833823,cg27119456,cg06739303,cg24527560,cg24598948,cg24714864,cg01485177	1	0.045572	9	0.043	0	0	RP11-313J2.1	12
chr14:105318277-105318495	cg25003922,cg19469722,cg19756885	1	-0.052677	3	0.043	0	0	.
chr16:1484404-1484814	cg16697268,cg09765014,cg26782218	1	-0.034085	3	0.043	0	0	CCDC154	41
chr16:3254035-3254568	cg12370322,cg08761659,cg07879977	1	0.033348	3	0.043	0	0	OR1F1,AJ003147.9	7.48
chr3:9005267-9005406	cg21877238,cg01884537,cg21902095	1	-0.040505	3	0.045	0	0	RAD18	43
chr4:1549952-1550350	cg10081074,cg16580985,cg25545917	1	-0.033148	3	0.045	0	3	.
chr4:3704878-3705590	cg15642673,cg05254651,cg06668235	1	-0.043171	3	0.045	1	0	.
chr11:48284247-48285822	cg22827986,cg00939808,cg00791588,cg04721828,cg06173461	1	0.038427	5	0.045	0	0	OR4X1	5
chr11:121970723-121970769	cg03891346,cg24213115,cg07281370	1	0.03681	3	0.045	0	0	MIR125B1,RP11-166D19.1	12.48
chr2:131094153-131094853	cg03748035,cg01331772,cg20964505	1	-0.036372	3	0.046	0	0	.
chr3:165555158-165555263	cg16102247,cg11482914,cg21995126	1	0.060447	3	0.046	0	0	BCHE	8
chr11:11862609-11862868	cg01298758,cg08496387,cg12492653	1	-0.030418	3	0.046	0	0	USP47	50
chr12:3566094-3566177	cg04941278,cg16746589,cg08799412	1	-0.031848	3	0.046	0	0	PRMT8	99
chr18:23713727-23713839	cg03162994,cg00262344,cg15865827	1	0.04622	3	0.046	0	0	PSMA8	20
chr3:187870927-187871025	cg14091103,cg05685023,cg19599666	1	0.038186	3	0.047	0	0	LPP-AS2,LPP	17.242
chr14:69341137-69341906	cg00000289,cg11072851,cg27036347,cg01707795,cg15425276	1	-0.040368	5	0.047	1	0	ACTN1	95
chr17:17109638-17109741	cg03292213,cg11392858,cg23661344,cg26539818,cg00572586	1	0.075172	5	0.047	0	0	PLD6,RP11-45M22.4,MPRIP	24,69,149
chr21:35899453-35899469	cg20710013,cg08975523,cg23093164	1	0.04909	3	0.047	0	0	RCAN1	80
chr3:62860708-62860803	cg22930588,cg17110239,cg21458907	1	-0.047154	3	0.048	0	0	CADPS	92
chr5:140514809-140515570	cg19568544,cg24583624,cg05579030,cg03349953,cg01851883	1	-0.035107	5	0.048	0	0	PCDHB5	18
chr7:150020123-150020207	cg03185704,cg18221429,cg07753583	1	0.066224	3	0.048	0	0	LRRC61,ACTR3C	31.46
chr10:1975560-1975632	cg27336261,cg00816387,cg19299265	1	0.032284	3	0.048	0	0	.
chr10:45359609-45359722	cg06188367,cg24969520,cg03444077	1	0.062504	3	0.048	0	0	TMEM72-AS1	84
chr10:102322352-102322695	cg20461188,cg23351954,cg15966747	1	0.047112	3	0.048	0	0	.
chr11:84634124-84634229	cg00846036,cg07520269,cg02707033	1	0.035419	3	0.048	0	0	DLG2	224
chr20:47013685-47013815	cg07019386,cg18598695,cg00070912	1	0.063475	3	0.048	1	0	RP1-66N13.1	7
chr2:220348513-220348804	cg18131810,cg11841522,cg00495988	1	-0.037558	3	0.049	0	0	AC053503.11,SPEG	86.109
chr4:187422112-187422337	cg16786756,cg21004358,cg18146936	1	0.058563	3	0.049	0	0	RNU6-1055P,F11-AS1,RP11-215A19.2	9,53,59
chr7:194717-194799	cg05968904,cg12012581,cg12042135	1	-0.094854	3	0.049	2	0	AC093627.12,FAM20C	35.1
chr14:23623754-23623936	cg01267709,cg26561526,cg01790464	1	0.038224	3	0.049	2	0	SLC7A8	52
chr15:79574674-79574848	cg01938189,cg23906060,cg24705646	1	0.035119	3	0.049	0	0	ANKRD34C,RP11-17L5.4	33.37
chr16:51184353-51184393	cg04550052,cg04698114,cg00582524	1	-0.039142	3	0.049	0	0	SALL1	50
chr19:50249462-50249777	cg22525294,cg26744682,cg03337057	1	0.040568	3	0.049	0	0	TSKS	28
chr21:45705541-45706044	cg01323542,cg16501323,cg17356252,cg18689454,cg16717549,cg11923631,cg27251412,cg09510531,cg08089567,cg12843033	1	0.036539	10	0.049	0	0	AIRE	34
Table S1: DMRs between responders and non-responders to lifestyle intervention; at baseline. Top candidate DMRs (adj. P≤0.05) are marked with dark grey. deltaM represents the difference of the mean average methylation rates between responders and non-responder as computed by metilene. The 2D-KS p-value represents a two dimensional variety of the Kolmogorov-Smirnov test used by metilene. Probes/DM…

## Sheet: Table S2
Table S2: Full list of discriminating DMRs (responder vs. non-responder) - T18
location	ProbeIDs	adj.P	deltaM	probes/DMR	2D-KS_p-value	SNPprobes	cross-reactive_probes	genes	probes/gene
chr10:134150449-134150761	cg24214699,cg21370255,cg10530568,cg22586726,cg25076597,cg02535060,cg03330181,cg05951994	3.6e-09	-0.088011	8	7.4e-15	0	0	LRRC27	81
chr6:49681176-49681775	cg14997592,cg04595372,cg25390787,cg26715042,cg08942800,cg01076129,cg15509430,cg12440062,cg17731305,cg21710255,cg01706515	0.0016	0.091913	11	3.4e-09	0	0	CRISP2	14
chr12:312593-313105	cg05860956,cg12790145,cg25329573,cg02780130,cg10075163,cg20188212	0.13	0.192618	6	2.6e-07	0	0	RP11-283I3.2,SLC6A12	9.59
chr17:33759510-33760309	cg03251655,cg19963856,cg24470734,cg11346248,cg21697381,cg19566405,cg05174890,cg10431713,cg20354552,cg00492719,cg08330690,cg10514580	0.15	0.090572	12	3e-07	0	0	SLFN12	22
chr13:21919004-21919171	cg24653167,cg20631839,cg18331106	0.47	-0.096058	3	9.8e-07	0	3	LINC00539	39
chr15:56299378-56299463	cg24530489,cg08306218,cg14121685	1	0.151533	3	4.1e-05	0	0	CNOT6LP1	5
chr19:57742110-57742261	cg25802888,cg08268757,cg19568003,cg26332114	1	0.048779	4	5.5e-05	0	0	AURKC	16
chr6:30039130-30039802	cg23712018,cg00947782,cg03343571,cg13185413,cg06249604,cg20119745,cg20249327,cg15877520,cg13918754,cg09279736,cg07382347,cg13401893,cg12633154,cg16078649,cg10930308,cg02188185,cg26730543,cg24103044	1	-0.111646	18	6.1e-05	3	0	RNF39	83
chr12:122356314-122356599	cg01765077,cg21171335,cg11867697,cg22618164,cg21016266	1	-0.115756	5	6.5e-05	0	0	RP11-87C12.2,WDR66	51.5
chr1:153234035-153234343	cg08611411,cg21860629,cg11534293	1	0.082765	3	0.00012	0	0	LOR	14
chr12:7781091-7781289	cg10578777,cg14906510,cg25828445	1	0.083608	3	0.00012	0	0	.
chr21:15352211-15352642	cg18681837,cg00566515,cg11324748	1	0.107408	3	0.00012	0	3	ANKRD20A11P	19
chr13:113296190-113296448	cg12351768,cg08183074,cg00557959,cg15756319	1	-0.057174	4	0.00016	0	0	.
chr5:110062341-110062838	cg23279021,cg17248924,cg11641395,cg06429214,cg25259944,cg20963261,cg22429640,cg19398821,cg27037608,cg17946588,cg10597099,cg19526166,cg26583412,cg06414816	1	0.055519	14	0.0002	2	0	TMEM232	63
chr9:90112590-90112620	cg12987790,cg26639247,cg00427237,cg26490957	1	-0.041757	3	0.0002	0	0	DAPK1	93
chr18:77905296-77905752	cg13704680,cg05251669,cg19774868,cg16244155,cg20191338,cg06092953,cg12061113,cg13287964	1	-0.093983	8	0.0002	0	1	ADNP2,AC139100.2	25.29
chr20:6748708-6748731	cg09211429,cg17774058,cg13724496	1	-0.030379	3	0.00021	0	0	BMP2	20
chr20:61371016-61371809	cg20159906,cg11182786,cg24235518,cg13213889,cg13292703	1	-0.040869	5	0.00029	3	0	NTSR1	38
chr2:113992692-113993314	cg23122642,cg21482265,cg11763394,cg21550016,cg07772999,cg19083407,cg07594247,cg17445212	1	0.077909	8	0.0003	0	0	AC016683.6,PAX8	56.66
chr14:24475904-24476479	cg22926554,cg03302811,cg02149323,cg17053590,cg09668244	1	-0.08261	5	0.0003	0	5	.
chr14:19109262-19109936	cg01588177,cg20517615,cg05195083	1	0.039812	3	0.00035	0	3	RP11-754I20.1	6
chr17:37011489-37011627	cg27500148,cg22230584,cg26419584	1	0.038094	3	0.00035	0	2	RPL23,RPS20P35	23.1
chr12:115135001-115135046	cg08086720,cg00661970,cg05398903	1	-0.031804	3	0.00036	0	0	.
chr18:10702329-10702720	cg25164787,cg19844266,cg14535707	1	-0.11432	3	0.00036	2	0	PIEZO2	112
chr3:51740620-51740897	cg22739025,cg25693132,cg21899500,cg00664406,cg04453050	1	-0.047452	5	0.00062	0	0	GRM2	35
chr12:54541102-54541190	cg05025605,cg23624926,cg14135027	1	-0.119304	3	0.00062	0	0	RP11-834C11.11	6
chr1:110254601-110255097	cg02797771,cg25593510,cg25520068,cg05376982,cg20803293,cg25210835,cg24467349,cg12858902,cg14377951,cg23719124,cg22864244	1	0.071454	11	0.0007	1	6	GSTM5	72
chr19:57742419-57742445	cg06643849,cg25432232,cg22711741	1	0.034774	3	0.00082	0	0	AURKC	16
chr13:100218550-100219014	cg17910899,cg20066226,cg13752184	1	0.078881	3	0.00084	0	0	.
chr11:27015517-27015657	cg10418755,cg02565993,cg07042914	1	0.07898	3	0.00091	0	0	FIBIN	10
chr10:106113173-106113271	cg12624829,cg18192222,cg05356308	1	0.053143	3	0.00092	0	0	CCDC147-AS1,CCDC147	10.31
chr4:186732835-186733061	cg12309668,cg04392082,cg02790305,cg26785346,cg01933073,cg18342119,cg13921444,cg04348265	1	-0.058652	8	0.00093	0	0	SORBS2	159
chr10:29698445-29698461	cg14970695,cg08367083,cg03496709	1	0.091071	3	0.00093	1	0	PTCHD3P1	41
chr2:132919538-132919866	cg20364988,cg15774040,cg22923398	1	0.039449	3	0.00094	0	2	ANKRD30BL	33
chr7:30635760-30635890	cg21429551,cg03068497,cg16875104	1	0.065146	3	0.00094	0	0	AC005154.6,GARS	46.39
chr19:21264894-21265422	cg01483656,cg19882830,cg17751872,cg01326874,cg15174294,cg06238316,cg09352518	1	0.157194	7	0.0013	0	4	ZNF714	14
chr22:20137435-20138178	cg05968150,cg25840306,cg27351844,cg17474665,cg24515868,cg00951518	1	-0.047075	6	0.0013	2	5	AC006547.14	10
chr15:45571524-45571778	cg23904581,cg09092052,cg17252077,cg16921702,cg23416540	1	0.0514	5	0.0014	0	0	CTD-2651B20.3	21
chr16:1121691-1121728	cg14083925,cg27392217,cg01404373	1	0.063553	3	0.0014	0	0	SSTR5-AS1,SSTR5	55.39
chr5:140864472-140864835	cg12648074,cg15949044,cg02022733,cg03640756,cg23445461,cg12145907	1	-0.049361	6	0.0015	0	0	PCDHGA9,PCDHGB6,PCDHGA10,PCDHGB7,PCDHGA11,PCDHGA12,PCDHGC3,PCDHGC4,PCDHGA1,PCDHGA2,PCDHGA3,PCDHGB1,PCDHGA4,PCDHGB2,PCDHGA5,PCDHGB3,PCDHGA6,PCDHGA7,PCDHGB4,PCDHGA8	200,189,174,157,134,99,65,42,443,426,403,384,366,347,330,307,292,274,255,235
chr11:68658381-68658837	cg21862992,cg06112835,cg21963583	1	-0.104076	3	0.0015	0	2	MRPL21	28
chr5:141348200-141348280	cg08665853,cg21256257,cg15812759,cg24777028,cg23743252	1	-0.053241	5	0.0017	0	0	PCDH12,RNF14	40.43
chr20:62327966-62328428	cg23773946,cg14697761,cg07620230,cg24354818,cg16702083	1	0.079437	5	0.0019	1	0	TNFRSF6B,RTEL1,RTEL1-TNFRSF6B	9,65,57
chr5:146831805-146832258	cg05730183,cg04833034,cg08737836	1	-0.061843	3	0.0023	0	0	DPYSL3	66
chr11:120856644-120856919	cg18247436,cg15174564,cg24255125	1	-0.065588	3	0.0023	0	0	GRIK4	189
chr21:44105263-44106234	cg23590273,cg16784985,cg18975948	1	0.046034	3	0.0023	0	0	PDE9A	88
chr1:2106220-2106401	cg15468976,cg27264462,cg23648809	1	-0.034564	3	0.0024	0	0	PRKCZ	301
chr1:120438923-120439037	cg23131777,cg22774211,cg16166968	1	0.037745	3	0.0024	0	0	ADAM30	14
chr1:248020690-248020813	cg23054189,cg20146541,cg07533148	1	-0.064816	3	0.0024	0	0	TRIM58	18
chr2:114737309-114737476	cg26867680,cg15915602,cg27087112	1	0.046213	3	0.0024	0	0	AC010982.1,AC110769.3	20.11
chr11:41481495-41481892	cg15681577,cg08072402,cg24638253,cg11382417,cg07895523	1	0.046002	5	0.0024	0	0	LRRC4C	87
chr11:67418289-67418316	cg25835179,cg09296957,cg12355172	1	-0.077502	3	0.0024	1	0	ACY3	20
chr17:48585214-48585271	cg11440486,cg20111217,cg00901687	1	-0.120457	3	0.0024	0	0	RP11-94C24.6,MYCBPAP	17.32
chr19:57742329-57742395	cg14370847,cg19603903,cg23371413	1	0.086071	3	0.0024	0	0	AURKC	16
chr2:183942980-183943939	cg20988589,cg09632303,cg26744578,cg12925933,cg27029635,cg11601112,cg08641796,cg12484193,cg20443138,cg20721750,cg21364150,cg02551347,cg16653432,cg02561726	1	0.042309	14	0.0026	0	0	DUSP19	18
chr8:52321551-52322138	cg06534901,cg06876964,cg01960936,cg00269553,cg20073313,cg13372743,cg27057652	1	0.037871	7	0.0026	0	0	PXDNL	57
chr15:31515748-31516482	cg25556225,cg27438152,cg10854819,cg19559891,cg19666541,cg03330558,cg12689679,cg25017403,cg24860562	1	0.043583	9	0.003	0	0	RP11-16E12.1,RP11-16E12.2	19.17
chr17:46681109-46682414	cg00072689,cg15435170,cg01986016,cg20471691,cg17179862,cg03803541,cg05900563,cg14230750,cg16848873,cg05888755,cg10906729,cg18684142,cg04588674,cg19828220	1	0.058031	14	0.0031	0	0	HOXB6,HOXB3,HOXB-AS3	51,208,210
chr3:9289745-9289894	cg22956060,cg23958524,cg21386647	1	0.047553	3	0.0032	0	0	SRGAP3	159
chr21:47604050-47605175	cg07747299,cg08742575,cg12016809,cg25545878,cg05896524,cg05672835,cg13704590,cg13012494,cg13732083,cg10296238	1	-0.108944	10	0.0032	2	0	AP001468.58,SPATC1L	10.23
chr2:74681553-74681806	cg17486538,cg26479323,cg03309722	1	0.035394	3	0.0034	0	0	INO80B	31
chr19:33622940-33622960	cg00366190,cg17764715,cg07827796	1	0.062183	3	0.0034	1	0	WDR88	29
chr3:42977713-42978181	cg11555493,cg27084712,cg11303738,cg22714811,cg08111629,cg21104412,cg08364654	1	0.052026	7	0.0035	0	0	KRBOX1-AS1,KRBOX1,KRBOX1	21,102,102
chr7:2802940-2802966	cg24648384,cg05793240,cg20884522	1	0.086197	3	0.0036	1	0	AMZ1,GNA12	162.132
chr7:50518348-50518574	cg03731078,cg22303909,cg23111338	1	0.076764	3	0.0036	0	0	FIGNL1	15
chr12:130707330-130707408	cg01016191,cg03897452,cg20736492	1	0.060924	3	0.0037	0	0	.
chr14:95942317-95942533	cg05006384,cg25472135,cg03228980	1	-0.033628	3	0.0037	0	0	SYNE3	36
chr18:7011215-7011389	cg22220710,cg03691722,cg05836043	1	-0.052659	3	0.0037	0	0	LAMA1	51
chr19:55476540-55478263	cg01717586,cg20067405,cg15031253,cg13425888,cg25651476,cg00686667,cg13093842,cg04887076,cg17760849,cg19689876,cg24040502,cg20995778	1	0.072493	12	0.0039	0	10	NLRP2,NLRP7	36.35
chr1:75590481-75591030	cg01077724,cg01540595,cg01066472	1	0.074487	3	0.004	0	0	RP11-510C10.4	3
chr4:100064964-100065547	cg24446454,cg27562174,cg12011299	1	-0.153645	3	0.0046	0	0	ADH4,RP11-696N14.1	9.51
chr20:5485142-5485295	cg21235746,cg03287299,cg25958766,cg20295248,cg16763089,cg10831901	1	0.073375	6	0.0051	0	0	LINC00654	11
chr12:54558272-54558300	cg19905308,cg04142929,cg20002756	1	-0.112626	3	0.0053	0	0	RP11-834C11.10,RP11-834C11.8	11.15
chr1:156616777-156616856	cg10389771,cg16269733,cg25773262	1	-0.05246	3	0.0054	0	0	BCAN,RP11-284F21.7	32.27
chr18:19756875-19757023	cg12615165,cg13427880,cg02360939	1	-0.046515	3	0.0054	0	0	RP11-627G18.2,GATA6	7.41
chr1:163038663-163038704	cg04053572,cg20056654,cg15923350	1	-0.044775	3	0.0055	0	0	RGS4	26
chr8:93522097-93522272	cg07945197,cg21542345,cg24018262	1	0.041805	3	0.0055	0	0	RP11-587H10.1	7
chr1:208425578-208425703	cg12895728,cg11318983,cg06191042	1	-0.05263	3	0.0056	1	0	.
chr16:34988894-34989238	cg08398596,cg06331400,cg07693639	1	0.038673	3	0.0056	0	0	RNA5SP421,RNA5SP422,RNA5SP423,5S_rRNA	7,10,10,4
chr20:61051315-61051562	cg24320612,cg16714055,cg11982072,cg24500900,cg08568720,cg18278265,cg02146001,cg23770904	1	-0.035203	8	0.0056	1	0	RP13-379O24.3,GATA5	14.41
chr2:181845409-181845503	cg18455490,cg00949554,cg04807694	1	0.076996	3	0.0057	0	3	AC104076.3,UBE2E3	8.43
chr5:23506736-23507753	cg04362002,cg10589310,cg25336267,cg19837938,cg02444433,cg22603366,cg09166973,cg07011961,cg25472530,cg22079902,cg01667892,cg05179993	1	0.056342	12	0.0057	0	4	PRDM9	15
chr7:31439-31498	cg05107246,cg15535638,cg20044143	1	0.066443	3	0.0057	0	3	.
chr10:16478852-16478911	cg00641873,cg27339437,cg06028533	1	-0.034006	3	0.0057	0	0	PTER	31
chr16:53407326-53407351	cg24278027,cg19691036,cg27310205	1	0.094107	3	0.0057	0	0	RP11-44F14.1,RP11-44F14.2	14.18
chr3:51740954-51741474	cg26079664,cg12934382,cg00303541,cg21213853	1	-0.064882	4	0.006	1	0	GRM2	35
chr5:151304768-151305529	cg20702419,cg25352328,cg11955641,cg11200917,cg23158483	1	0.052032	5	0.0062	0	0	GLRA1	30
chr12:31272110-31272120	cg17292337,cg10317314,cg14687298	1	-0.126285	3	0.008	0	0	RP11-551L14.1	18
chr12:54520917-54521978	cg11306441,cg16396919,cg25701444	1	-0.03858	3	0.008	1	0	RP11-834C11.5,RP11-834C11.4	29.12
chr17:16593515-16593583	cg07570663,cg25349314,cg04306489	1	0.064903	3	0.008	0	2	CCDC144A,RP11-219A15.1	28.27
chr4:81111175-81111394	cg27111250,cg10129063,cg27639662	1	0.069057	3	0.0082	0	0	RP11-377G16.2,PRDM8	28.62
chr2:231067422-231067770	cg10096208,cg22577878,cg19764668	1	-0.037122	3	0.0084	0	0	SP110,SP140	48.69
chr5:179740186-179741121	cg14794799,cg23221052,cg13944838,cg23248424,cg02891314	1	0.069315	5	0.0084	0	0	GFPT2	60
chr7:72972277-72972388	cg05386606,cg27441048,cg05555294,cg03572677	1	0.03336	4	0.0084	0	0	BCL7B	26
chr1:166459323-166459525	cg09755589,cg17665268,cg22100019	1	-0.055922	3	0.0086	0	2	RP11-276E17.2	5
chr6:291901-292386	cg03395511,cg18110333,cg05064044	1	0.096109	3	0.0086	0	0	DUSP22	50
chr20:55401916-55402744	cg13683550,cg18394120,cg16569525	1	-0.046334	3	0.0087	0	0	.
chr10:42862874-42863595	cg16449687,cg23026554,cg06833823,cg27119456,cg06739303,cg24527560,cg24598948,cg24714864,cg01485177	1	0.051119	9	0.0089	0	0	RP11-313J2.1	12
chr10:128946440-128947231	cg01112499,cg08344422,cg14939821	1	-0.067765	3	0.0092	0	0	DOCK1,FAM196A	165.47
chr6:10495221-10495436	cg13856384,cg12634245,cg20139336	1	-0.058747	3	0.0093	0	0	GCNT2	77
chr16:53543682-53544322	cg07828806,cg09728985,cg04059762,cg05113697,cg05997655	1	0.03241	5	0.0093	1	0	.
chr7:150019971-150020962	cg00487984,cg06975979,cg03185704,cg18221429,cg07753583,cg22747650,cg10348193,cg11026333,cg01270001,cg22893248,cg21516287,cg02639123,cg02119840,cg11347411,cg11740103,cg25183474	1	0.050239	16	0.0095	0	0	LRRC61,ACTR3C	31.46
chr17:7036932-7037099	cg18447972,cg11992241,cg08154612	1	-0.042348	3	0.0097	0	0	.
chr21:46975895-46976341	cg25211403,cg21139150,cg22851299	1	-0.109492	3	0.0098	0	0	.
chr8:94508148-94508435	cg15623175,cg03186975,cg17118836	1	0.060638	3	0.01	0	0	LINC00535	99
chrX:37026362-37026474	cg02907441,cg26739410,cg02332456	1	0.040846	3	0.01	1	2	FAM47C	11
chr6:170589481-170589898	cg19888017,cg03775991,cg12814571,cg00599530,cg13019844	1	0.052063	5	0.011	0	0	.
chrX:2886306-2886517	cg04484376,cg09891853,cg01170371	1	0.098227	3	0.011	0	0	ARSE	15
chr1:60280413-60280504	cg00210596,cg08231348,cg11792516	1	-0.048599	3	0.012	0	0	HOOK1	25
chr1:63249197-63249214	cg09756865,cg24082680,cg22683036,cg06366791	1	0.059056	3	0.012	0	0	ATG4C	17
chr7:20817528-20817928	cg08650910,cg26802289,cg02285887	1	-0.03641	3	0.012	0	0	.
chr7:63016102-63016836	cg14516793,cg08678397,cg13374304,cg10078143	1	0.034632	3	0.012	0	4	SLC29A4P2	8
chr8:1713003-1713013	cg11322655,cg26702323,cg26975524	1	0.059586	3	0.012	0	0	CTD-2336O2.1,CLN8	16.62
chr10:13481844-13481945	cg12390516,cg19411738,cg24686497	1	-0.06902	3	0.012	1	0	BEND7	78
chr14:97059190-97059350	cg24034005,cg06741112,cg01683794	1	-0.034451	3	0.012	1	0	RP11-433J8.1	12
chr21:47581040-47581559	cg05200811,cg11766577,cg13126279	1	0.083191	3	0.012	0	0	SPATC1L	23
chr2:105853524-105853797	cg27422857,cg26874229,cg22878388	1	0.103862	3	0.013	0	0	.
chr2:114033358-114033582	cg25243455,cg06675538,cg01577475	1	-0.068323	3	0.013	0	0	AC016683.6,PAX8	56.66
chr4:81111505-81111986	cg03404272,cg06440348,cg21082141	1	0.035142	3	0.013	0	0	RP11-377G16.2,PRDM8	28.62
chr4:144833141-144833406	cg14302049,cg25668320,cg07876350	1	0.031651	3	0.013	1	2	RP11-673E1.3,RP11-673E1.1	5.9
chr6:146660977-146661193	cg26103798,cg13192323,cg23376330	1	-0.036504	3	0.013	0	0	RNA5SP222,GRM1	3.51
chr7:5272062-5272276	cg09523782,cg15277378,cg20099458	1	0.0305	3	0.013	0	0	WIPI2	73
chr8:674432-674561	cg17179911,cg21650737,cg27048067	1	0.087588	3	0.013	0	0	ERICH1	194
chr12:14926742-14926910	cg26127836,cg01847718,cg07112131	1	0.063022	3	0.013	0	0	H2AFJ	18
chr12:56040104-56040337	cg25695610,cg08013331,cg26417417	1	0.075248	3	0.013	0	0	OR10AE3P,RP11-644F5.16	6.17
chr12:132278428-132278511	cg09814354,cg03550075,cg01614703	1	0.055212	3	0.013	0	0	SFSWAP	106
chr16:85368680-85368974	cg02016305,cg10066698,cg02418439	1	-0.067368	3	0.013	1	0	.
chr19:22235156-22235200	cg07352620,cg17555429,cg25360861	1	0.057494	3	0.013	0	0	ZNF257	15
chr20:36156917-36156961	cg00216901,cg06133908,cg01082601	1	0.032684	3	0.013	0	0	PPIAP3,BLCAP	8.125
chr21:35831869-35831959	cg23480619,cg14535332,cg08823027	1	0.109823	3	0.013	0	0	KCNE1	51
chr1:17020228-17020879	cg01260170,cg15629460,cg21460394,cg18932417,cg01395667	1	-0.045097	5	0.014	1	3	ESPNP	45
chr2:43903468-43904012	cg09325404,cg11267669,cg14230606,cg09132607,cg02111748,cg18817560,cg13324389,cg20563666,cg14454477,cg08726338	1	0.053152	10	0.015	2	0	AC011242.6,PLEKHH2	11.37
chr2:129659314-129659947	cg06829154,cg12948059,cg04855401,cg18478731,cg11942181	1	0.036944	5	0.015	0	0	.
chr7:27182635-27183817	cg05076221,cg23936031,cg09549073,cg04863892,cg09207400,cg19759481,cg02916332,cg17569124,cg02005600,cg25307665,cg14014955,cg02646423,cg20517050,cg23204968	1	0.043062	14	0.015	0	0	HOXA3,RP1-170O19.22,HOXA-AS3,HOXA5	221,144,150,45
chr2:118616153-118617500	cg25619440,cg03288922,cg22762992,cg06940110,cg24213669,cg00046336,cg22545206	1	0.073852	7	0.016	0	0	HTR5BP	15
chr10:118896514-118897281	cg10437245,cg11398452,cg27533288,cg21242918,cg09935282	1	-0.03523	5	0.016	0	0	VAX1	41
chr19:10172823-10172900	cg07749412,cg22597210,cg02505002	1	0.095835	3	0.016	0	0	C3P1	21
chr14:19641331-19641453	cg00315280,cg20168315,cg23315518	1	0.037127	3	0.017	0	3	CTD-2314B22.1	11
chr1:110230250-110230402	cg11680055,cg16180556,cg24506221	1	0.133432	3	0.018	0	1	GSTM2,GSTM1	30.14
chr1:196866320-196866513	cg20784841,cg15100757,cg10627839	1	0.061787	3	0.018	0	0	CFHR2,CFHR4	18.12
chr9:130955133-130955437	cg10071929,cg13642260,cg09976142	1	0.072084	3	0.018	0	0	CIZ1	42
chr14:104896558-104897069	cg09154395,cg00908381,cg04987823	1	0.033502	3	0.018	0	3	.
chr16:56995811-56995857	cg09889350,cg12564453,cg16660091	1	0.031358	3	0.018	0	0	CETP	18
chr1:19973880-19974177	cg18045201,cg03950225,cg14714346	1	0.056556	3	0.019	0	1	NBL1,MINOS1-NBL1	43.7
chr2:118617768-118617842	cg19095317,cg23829273,cg07643322	1	0.091772	3	0.019	0	0	HTR5BP	15
chr3:9988142-9988663	cg02725398,cg01142302,cg16533830	1	0.053218	3	0.019	0	0	PRRT3,PRRT3-AS1	25.25
chr7:44079003-44079585	cg23814184,cg14743534,cg11307134	1	-0.065879	3	0.019	0	2	LINC00957,RASA4CP	8.11
chr2:43327935-43328537	cg03125400,cg00881696,cg05672223,cg04981619,cg14706297,cg24601559	1	0.035789	6	0.02	1	0	AC093609.1	13
chr5:102898221-102898734	cg07666882,cg02976617,cg13665998,cg03073264,cg06105925,cg20279471,cg09166085,cg07655627,cg15206834	1	0.03444	9	0.02	0	0	NUDT12	14
chr8:65711520-65711659	cg19424531,cg00054210,cg01510388	1	-0.03371	3	0.02	0	0	CYP7B1	33
chr12:86229802-86230558	cg06740227,cg02569458,cg00310523,cg25456477,cg08358620,cg27035734	1	-0.035924	6	0.02	0	0	RASSF9	13
chr15:22833147-22833976	cg07959104,cg17809365,cg16707215,cg18106434,cg24525828,cg16639637,cg06756169,cg17121412,cg02478956,cg17161804,cg09762043,cg25490410	1	0.051232	12	0.02	0	0	TUBGCP5	26
chr16:54965032-54965143	cg12719461,cg02056682,cg05870072,cg05362516,cg06191898,cg09641689	1	-0.031198	6	0.02	0	0	IRX5	26
chr19:29217856-29218775	cg25267487,cg04546413,cg14983838,cg12756686,cg06920399,cg12667521,cg03161606	1	-0.098074	7	0.02	1	0	AC005307.3	36
chr10:54538303-54538683	cg17334937,cg03716984,cg07745596	1	0.043911	3	0.021	0	0	.
chr10:88227404-88228043	cg11533763,cg06690989,cg20474201	1	-0.037012	3	0.021	0	0	WAPAL	37
chr21:40361881-40362858	cg02515900,cg20721960,cg22133743	1	-0.042501	3	0.021	0	0	AF064858.8	12
chr2:50201411-50201512	cg18396357,cg08415819,cg20062057,cg20536469,cg22322562	1	-0.033376	5	0.022	1	0	NRXN1	141
chr3:53700139-53700277	cg15417641,cg00336149,cg21188533,cg13411554	1	-0.078134	4	0.022	1	0	CACNA1D	110
chr7:45960365-45960866	cg06713098,cg14625938,cg07869380,cg23191657,cg08027385	1	-0.053436	5	0.022	0	0	IGFBP3	48
chr7:91510445-91510598	cg01785046,cg09669835,cg10872641	1	0.065101	3	0.022	0	0	MTERF	27
chr13:97646895-97647223	cg01955239,cg24663970,cg21810047	1	0.033101	3	0.022	1	0	OXGR1	15
chr15:67355495-67356943	cg25601829,cg20356637,cg09501821,cg23731272,cg02486855	1	0.063923	5	0.022	0	0	SMAD3	119
chr17:79374325-79374516	cg16779839,cg11976222,cg06636541	1	0.04855	3	0.022	1	0	RP11-1055B8.6,MIR4740,RP11-1055B8.7	33,6,127
chr19:36485280-36485361	cg26643967,cg19389372,cg04579398	1	0.040597	3	0.022	0	0	SDHAF1	14
chr3:187870927-187871025	cg14091103,cg05685023,cg19599666	1	0.046537	3	0.023	0	0	LPP-AS2,LPP	17.242
chr6:152011654-152012888	cg04211581,cg18007957,cg23050405,cg22157087	1	-0.047255	4	0.024	0	0	ESR1	122
chr7:1216822-1216934	cg17541715,cg27094323,cg17372657	1	0.087491	3	0.024	0	0	.
chr7:151107398-151107688	cg21532325,cg16482474,cg17509603	1	0.039327	3	0.024	0	0	WDR86,WDR86-AS1	74.21
chr7:187252-187340	cg02820566,cg20865618,cg25980689	1	-0.090074	3	0.025	1	0	AC093627.12	35
chr7:51539321-51539584	cg06593753,cg07537562,cg08767820	1	0.073589	3	0.025	0	0	.
chr11:27015811-27015992	cg15621260,cg04622802,cg01649773	1	0.046817	3	0.025	0	0	FIBIN	10
chr14:101194143-101194749	cg09971646,cg19628497,cg18279536	1	0.05302	3	0.025	1	0	DLK1	39
chr20:49465259-49465723	cg00141838,cg26322579,cg03284132	1	-0.053033	3	0.025	0	0	BCAS4	58
chr1:86044139-86044231	cg05690441,cg10593400,cg17108141	1	0.047469	3	0.026	0	0	RP11-290M5.4,DDAH1	7.89
chr2:139537822-139537844	cg18150439,cg14923640,cg20331795	1	-0.072812	3	0.026	0	0	NXPH2	26
chr3:87040080-87040427	cg20109541,cg15624852,cg09376680	1	-0.035846	3	0.026	0	0	VGLL3	27
chr3:159557491-159559192	cg27400205,cg25705519,cg09345606,cg00188627,cg15180789,cg10088405,cg23553912,cg13447038,cg12020251	1	0.032031	9	0.026	0	0	SCHIP1,IQCJ-SCHIP1	37.166
chr4:124230-125505	cg20320494,cg19819404,cg22831726,cg12717203,cg21149944,cg25397663,cg15792688,cg10197305,cg05388281	1	0.036583	9	0.026	0	1	Z95704.5,ZNF718	10.19
chr4:83932056-83932169	cg19517378,cg08555013,cg10724425	1	-0.035728	3	0.026	0	0	LIN54	44
chr6:28226939-28227128	cg18979916,cg13997680,cg17384889,cg18694169,cg10253847,cg01031101,cg09523275,cg18675097	1	0.046725	8	0.026	0	0	NKAPL,ZKSCAN4	19.4
chr6:159360703-159360845	cg03739955,cg00788177,cg21583723	1	0.051111	3	0.026	0	0	.
chr10:81890158-81890396	cg17107701,cg09603594,cg23234761	1	0.034874	3	0.026	0	0	PLAC9	27
chr11:325913-326357	cg09597767,cg03071500,cg11192219	1	-0.048491	3	0.026	0	0	IFITM3,RP11-326C3.13,RP11-326C3.12	23,7,7
chr12:34551992-34552934	cg21451653,cg26024424,cg21383772	1	0.055484	3	0.026	1	0	.
chr17:55064436-55064946	cg16003096,cg18463707,cg11129779	1	-0.038072	3	0.026	1	0	SCPEP1	28
chr19:22193477-22193725	cg27291304,cg09418063,cg26938561	1	0.033398	3	0.026	0	1	ZNF208	19
chrX:102000744-102000759	cg04039555,cg00328582,cg06302025	1	-0.04091	3	0.026	0	0	BHLHB9	25
chr1:31654451-31654793	cg25010788,cg24455649,cg08847173	1	0.098323	3	0.027	0	0	NKAIN1	37
chr1:42611605-42611688	cg24998527,cg22816091,cg06092502	1	0.057596	3	0.027	0	0	.
chr1:149908751-149908782	cg17353890,cg26645700,cg24620905	1	0.036335	3	0.027	0	0	MTMR11	21
chr1:248100583-248100601	cg03748376,cg00785941,cg20507276	1	-0.104879	3	0.027	0	0	RP11-438H8.8,OR2L13	13.62
chr2:105853155-105853270	cg23676956,cg04850045,cg20265528	1	0.050892	3	0.027	0	0	.
chr3:27674459-27674538	cg13707894,cg23439966,cg01105833	1	0.03856	3	0.027	0	1	AC098614.2	8
chr3:186490342-186490729	cg12435415,cg22984571,cg21530419	1	0.039911	3	0.027	0	0	RNU6-1105P,RP11-573D15.6	6.6
chr6:33560951-33561182	cg19735538,cg04329454,cg01392313	1	0.073841	3	0.027	0	0	LINC00336	13
chr6:37617862-37618010	cg20053110,cg24796644,cg26720545	1	-0.11282	3	0.027	0	0	MDGA1	59
chr6:139012990-139013147	cg06864789,cg25399239,cg18136963	1	-0.200643	3	0.027	0	0	RP11-390P2.4,NHSL1	14.101
chr6:169309816-169310582	cg06010667,cg02680710,cg06781828	1	0.033529	3	0.027	0	0	.
chr7:51544185-51544519	cg04780016,cg20478239,cg22027267	1	-0.039558	3	0.027	0	0	.
chr10:131989554-131989850	cg15638969,cg26187194,cg11372818	1	0.038459	3	0.027	0	0	.
chr11:57414243-57414458	cg10969211,cg27368025,cg10366093	1	-0.031434	3	0.027	0	0	YPEL4,AP000662.4	23.37
chr12:4829634-4829828	cg03001012,cg22294288,cg14920334	1	-0.035422	3	0.027	0	1	RP11-234B24.2,RP11-234B24.6,GALNT8	12,24,57
chr12:131142314-131142649	cg03801385,cg01682784,cg25198599	1	0.035547	3	0.027	0	0	RP11-662M24.2,RP11-662M24.1,RIMBP2	95,13,277
chr13:21900390-21900507	cg13903179,cg04632378,cg19500098	1	0.047152	3	0.027	0	0	LINC00539	39
chr13:100217922-100217996	cg15466234,cg05912299,cg14972141	1	0.04794	3	0.027	0	0	.
chr14:24458206-24458346	cg01597387,cg10199763,cg20812929	1	-0.058746	3	0.027	0	2	DHRS4-AS1,DHRS4L2	2.35
chr14:93698051-93698417	cg16602316,cg06821828,cg12944343	1	0.064644	3	0.027	0	1	.
chr14:96180574-96180644	cg19992633,cg27089768,cg24996565	1	0.060116	3	0.027	1	0	TCL1A,RP11-164H13.1	16.18
chr15:99409940-99409958	cg25404375,cg17074431,cg11544420	1	0.030709	3	0.027	0	0	IGF1R	211
chr16:745683-745766	cg01003448,cg07482202,cg01195246	1	0.055994	3	0.027	0	0	FBXL16	37
chr16:53407676-53407809	cg10144400,cg04653913,cg02380802	1	0.073359	3	0.027	0	0	RP11-44F14.1,RP11-44F14.2	14.18
chr16:69966900-69966976	cg03549146,cg00158530,cg08209934	1	-0.058806	3	0.027	0	0	MIR140,WWP2	9.113
chr1:225117074-225117432	cg14091631,cg25379026,cg18701048,cg03940634,cg10174867	1	-0.034986	5	0.028	0	0	DNAH14	29
chr5:135415188-135416614	cg00308130,cg15837280,cg07158503,cg04515200,cg13581155,cg11978884,cg11608150,cg06478886,cg04481923,cg18678645,cg06536614,cg25340688,cg26896946,cg00124993,cg08745965,cg18797653	1	-0.073303	16	0.028	0	0	VTRNA2-1	8
chr17:17109638-17109741	cg03292213,cg11392858,cg23661344,cg26539818,cg00572586	1	0.062009	5	0.028	0	0	PLD6,RP11-45M22.4,MPRIP	24,69,149
chr19:39466714-39467436	cg10742957,cg14206172,cg06247012,cg24010336,cg08844745	1	0.035801	5	0.028	0	0	FBXO17	37
chr6:28601269-28601520	cg07017437,cg25653641,cg22572476,cg19488431,cg27535677,cg22497095,cg26865747,cg03759229,cg13565129,cg14654363,cg00990380,cg12763978	1	0.037934	12	0.029	0	1	RP11-373N24.2	27
chr14:24438775-24439158	cg01216060,cg18659398,cg16779295,cg02358448,cg14214739	1	-0.057411	5	0.029	0	5	DHRS4-AS1,DHRS4L2	2.35
chr1:16163477-16163776	cg24735235,cg04889800,cg19025461,cg01429859	1	0.058372	4	0.03	0	0	RP11-169K16.9	35
chr4:184642623-184642972	cg26678138,cg22078781,cg08721802,cg12755745	1	0.049577	4	0.03	0	0	.
chr2:220108180-220108497	cg02258512,cg09715285,cg10602248,cg04945312,cg21893210,cg24061197	1	0.042587	6	0.032	0	0	GLB1L	32
chr17:41277972-41278430	cg25067162,cg26276233,cg06001716,cg02286533,cg14947218,cg16006004,cg18372208,cg25288140,cg19454999,cg15065591,cg11529738,cg26370022	1	0.036096	12	0.032	1	2	BRCA1,NBR2	59.52
chr11:6291623-6292512	cg13580265,cg19364351,cg04467334,cg26313599,cg04585209,cg18706028,cg26700447	1	0.061017	7	0.034	0	0	CCKBR	29
chr2:220325367-220325444	cg21117965,cg07974504,cg14890311	1	-0.033318	3	0.035	1	0	SPEG	109
chr8:23563968-23564026	cg15854847,cg05477514,cg20892260	1	-0.035377	3	0.035	0	0	NKX2-6,RP11-175E9.1	25.67
chr6:28446792-28447116	cg03350138,cg01792601,cg26968378,cg12584458,cg21903646	1	0.0662	5	0.036	0	0	.
chr16:68772223-68772470	cg01251360,cg24765079,cg09406989	1	0.048797	3	0.036	0	0	CDH1	58
chr2:113542089-113542347	cg00839584,cg27606396,cg04859800,cg13953976	1	0.032907	4	0.037	0	0	IL1A	11
chr3:113234787-113235259	cg11625897,cg10517650,cg11125901	1	-0.050164	3	0.037	0	0	SPICE1	23
chr5:162864456-162864497	cg18020381,cg06646650,cg12879386,cg04232649,cg17876308	1	0.055726	5	0.037	0	0	CCNG1,RP11-541P9.3	25.37
chr7:2764127-2764247	cg17393140,cg16478634,cg15247329	1	0.078691	3	0.037	1	0	AMZ1	162
chr8:145638432-145639075	cg18246227,cg02583091,cg05681977,cg22088683,cg21788897	1	0.081661	5	0.037	0	0	SLC39A4	33
chr17:405176-406502	cg25882591,cg18727120,cg00416177,cg04370829,cg16835101,cg20547929,cg00430613,cg01214346	1	0.03728	8	0.037	0	0	RP5-1029F21.3	12
chr2:24397817-24397872	cg06482857,cg17277199,cg21778743	1	0.034344	3	0.038	0	0	AC008073.7,FAM228A,RP11-507M3.1	19,20,41
chr5:150284414-150284449	cg04675542,cg02343823,cg08580836	1	0.031303	3	0.038	0	0	ZNF300	19
chr8:18078442-18078757	cg09152224,cg13828131,cg09102997	1	0.03587	3	0.038	2	0	NAT1	30
chr10:1851416-1851599	cg23694630,cg00792235,cg03402698	1	0.03667	3	0.038	0	0	.
chr10:134000032-134000288	cg01261798,cg08753373,cg05652533	1	0.035143	3	0.038	0	0	RP11-140A10.3,DPYSL4	25.42
chr17:77721822-77722337	cg18933840,cg02440668,cg13261713	1	0.044987	3	0.038	0	0	.
chr18:74960994-74961003	cg25165358,cg26065057,cg18461021	1	0.077746	3	0.038	0	0	.
chr19:47016867-47017051	cg01392841,cg13801271,cg15825916	1	-0.034145	3	0.038	0	0	PPP5D1	71
chr12:34756040-34756335	cg15331945,cg25343246,cg05196046	1	0.042381	3	0.039	0	0	.
chr19:54976499-54976757	cg24468070,cg02928664,cg11456145	1	0.036113	3	0.039	0	0	CDC42EP5	17
chr10:16563819-16564188	cg10982433,cg01866359,cg00267286	1	-0.035296	3	0.04	0	0	C1QL3	24
chr10:115860295-115860607	cg16734433,cg24756403,cg04526584	1	0.042013	3	0.04	0	0	.
chr15:34516385-34516778	cg17618596,cg05180717,cg14433151,cg14847483,cg12949483	1	0.063794	5	0.04	0	1	EMC4	13
chr1:19600671-19601027	cg13935437,cg18202521,cg12798157,cg11376198,cg09045262,cg07162162	1	-0.035922	6	0.041	1	0	AKR7L	13
chr8:125462976-125463067	cg07349283,cg09825146,cg26141173,cg11829072,cg25375711,cg26547947	1	-0.04277	6	0.041	2	0	TRMT12	12
chr10:134068303-134068465	cg08867390,cg05201403,cg27145048	1	-0.052989	3	0.041	0	0	STK32C	186
chr14:23352251-23352489	cg25520324,cg17976873,cg24129115	1	0.051735	3	0.041	0	0	REM2	14
chr1:161708997-161710014	cg23839599,cg11320225,cg18644227	1	0.037104	3	0.042	0	0	.
chr1:213224391-213224443	cg07635306,cg14576824,cg23268653	1	0.035484	3	0.042	0	0	RPS6KC1	34
chr4:174203059-174203406	cg19884032,cg04328001,cg13220973	1	-0.078366	3	0.043	0	0	GALNT7	74
chr5:172385449-172385678	cg10782958,cg24884145,cg23193410	1	-0.038409	3	0.043	0	0	CTC-308K20.1,RPL26L1	25.27
chr14:105318277-105318495	cg25003922,cg19469722,cg19756885	1	-0.041769	3	0.043	0	0	.
chr4:89152210-89153741	cg23706819,cg16432182,cg07292612,cg04265436,cg25102622,cg23118773,cg05454547,cg20558008,cg01594388	1	0.054915	9	0.044	0	0	ABCG2	40
chr7:38350919-38351227	cg15181598,cg06132400,cg25335841,cg07076816,cg00739278	1	0.05934	5	0.044	1	0	AC006033.22	6
chr12:14926984-14927100	cg09163005,cg03111818,cg08855729	1	0.057207	3	0.044	0	0	H2AFJ	18
chr1:38230832-38230949	cg18537001,cg21306240,cg14002285	1	-0.031624	3	0.045	0	0	EPHA10	62
chr1:244395113-244395353	cg26436731,cg18379829,cg05248971	1	0.05387	3	0.045	0	0	.
chrX:48432150-48432363	cg11098911,cg03128268,cg12983165	1	0.068762	3	0.045	0	0	AC115618.1,RBM3	21.24
chr19:54945957-54946219	cg24365804,cg13123480,cg18593111,cg11788633,cg02086964	1	0.054517	5	0.046	0	0	AC008746.3,TTYH1	9.35
chr2:241938157-241938437	cg11769456,cg27472905,cg05078238,cg15133301,cg08233654	1	-0.047481	5	0.047	0	0	SNED1	94
chr11:32417884-32417914	cg08540275,cg20641425,cg00806185	1	-0.059991	3	0.047	0	0	WT1	84
chr11:128694301-128694680	cg07690882,cg20933297,cg09971562	1	0.039715	3	0.047	0	0	.
chr14:75390230-75390402	cg06637938,cg20204167,cg20682842,cg19841496,cg12643970	1	0.048147	5	0.047	0	0	RPS6KL1	32
chr16:54228321-54228448	cg27520536,cg03687532,cg07506749	1	0.041585	3	0.047	0	0	.
chr1:18502489-18503210	cg06163573,cg12640049,cg12439555	1	-0.030151	3	0.048	1	0	RP11-174G17,IGSF21	8.123
chr2:110372873-110373003	cg17866732,cg06665305,cg03552103	1	-0.031165	3	0.048	0	0	SOWAHC,SEPT10	22.37
chr6:160241103-160241557	cg27247736,cg17481235,cg21457401,cg03197101,cg15829665	1	-0.056735	5	0.048	0	0	PNLDC1	30
chr9:73566-73836	cg13624860,cg10792544,cg13550694	1	0.062824	3	0.048	0	2	RP11-143M1.7,RP11-143M1.2	6.5
chr10:102322352-102322695	cg20461188,cg23351954,cg15966747	1	0.053612	3	0.048	0	0	.
chr11:126872758-126872864	cg06504925,cg16652303,cg17273911	1	-0.056015	3	0.048	0	0	KIRREL3-AS3,AP002833.1,KIRREL3	15,11,185
chr12:6772184-6772318	cg18123790,cg00591160,cg27116036	1	-0.030004	3	0.048	0	0	RP4-761J14.8,ING4	16.18
chr15:90931450-90931463	cg07007674,cg08426161,cg25186680	1	0.030531	3	0.048	1	0	IQGAP1	48
chr21:46074614-46074855	cg07018760,cg23624441,cg01598160	1	-0.063025	3	0.048	1	0	KRTAP12-4,TSPEAR	7.216
chr1:6514661-6515581	cg06085683,cg00158227,cg00833822	1	-0.040566	3	0.049	0	2	ESPN	66
chr22:30969812-30970730	cg17380689,cg07274898,cg27102378	1	-0.043705	3	0.049	0	0	GAL3ST1	35
chr22:50986960-50987454	cg03957481,cg16443812,cg17174023	1	-0.037182	3	0.049	0	0	KLHDC7B	13
Table S2: DMRs between responders and non-responders to lifestyle intervention; after the intervention finished. Top candidate DMRs (adj. P≤0.05) are marked with dark grey. deltaM represents the difference of the mean average methylation rates between responders and non-responder as computed by metilene. The 2D-KS p-value represents a two dimensional variety of the Kolmogorov-Smirnov test used by…

## Sheet: Table S3
Table S3: Full list of discriminating DMRs (responder vs. non-responder) – from combined datasets T0 and T18
location	ProbeIDs	adj.P	deltaM	probes/DMR	2D-KS_p-value	SNPprobes	cross-reactive_probes	genes	probes/gene
chr10:134150449-134150761	cg24214699,cg21370255,cg10530568,cg22586726,cg25076597,cg02535060,cg03330181,cg05951994	2.4e-15	-0.082275	8	5e-21	0	0	LRRC27	81
chr6:49681176-49681392	cg14997592,cg04595372,cg25390787,cg26715042,cg08942800,cg01076129,cg15509430,cg12440062	6.1e-11	0.101266	8	1.3e-16	0	0	CRISP2	14
chr17:33759510-33760309	cg03251655,cg19963856,cg24470734,cg11346248,cg21697381,cg19566405,cg05174890,cg10431713,cg20354552,cg00492719,cg08330690,cg10514580	5.4e-06	0.083168	12	1.1e-11	0	0	SLFN12	22
chr13:21919004-21919171	cg24653167,cg20631839,cg18331106	3.8e-05	-0.090555	3	7.9e-11	0	3	LINC00539	39
chr19:57742110-57742424	cg25802888,cg08268757,cg19568003,cg26332114,cg14370847,cg19603903,cg23371413,cg06643849,cg25432232	0.005	0.05827	9	1.1e-08	0	0	AURKC	16
chr6:30039130-30039802	cg23712018,cg00947782,cg03343571,cg13185413,cg06249604,cg20119745,cg20249327,cg15877520,cg13918754,cg09279736,cg07382347,cg13401893,cg12633154,cg16078649,cg10930308,cg02188185,cg26730543,cg24103044	0.0077	-0.114807	18	1.6e-08	3	0	RNF39	83
chr12:311645-313379	cg00171154,cg27032281,cg05860956,cg12790145,cg25329573,cg02780130,cg10075163,cg20188212,cg17711915	0.0082	0.126218	9	1.7e-08	1	0	RP11.283I3.2,SLC6A12	9.59
chr20:61371016-61371809	cg20159906,cg11182786,cg24235518,cg13213889,cg13292703	0.024	-0.041995	5	5.1e-08	3	0	NTSR1	38
chr1:153234035-153234343	cg08611411,cg21860629,cg11534293	0.062	0.079843	3	1.3e-07	0	0	LOR	14
chr18:77905296-77905752	cg13704680,cg05251669,cg19774868,cg16244155,cg20191338,cg06092953,cg12061113,cg13287964	0.062	-0.092938	8	1.3e-07	0	1	ADNP2,AC139100.2	25.29
chr12:54541102-54541190	cg05025605,cg23624926,cg14135027	0.083	-0.11886	3	1.7e-07	0	0	RP11.834C11.11	6
chr2:113992692-113993314	cg23122642,cg21482265,cg11763394,cg21550016,cg07772999,cg19083407,cg07594247,cg17445212	0.14	0.077169	8	2.8e-07	0	0	AC016683.6,PAX8	56.66
chr13:113296190-113296448	cg12351768,cg08183074,cg00557959,cg15756319	0.15	-0.05827	4	3.2e-07	0	0	.
chr14:24475904-24476479	cg22926554,cg03302811,cg02149323,cg17053590,cg09668244	0.16	-0.087063	5	3.3e-07	0	5	.
chr12:122356314-122356599	cg01765077,cg21171335,cg11867697,cg22618164,cg21016266	0.18	-0.11652	5	3.8e-07	0	0	RP11.87C12.2,WDR66	51.5
chr10:106113173-106113271	cg12624829,cg18192222,cg05356308	0.23	0.054553	3	4.9e-07	0	0	CCDC147.AS1,CCDC147	10.31
chr15:56299378-56299463	cg24530489,cg08306218,cg14121685	0.25	0.134751	3	5.3e-07	0	0	CNOT6LP1	5
chr22:20137435-20138178	cg05968150,cg25840306,cg27351844,cg17474665,cg24515868,cg00951518	0.29	-0.048463	6	6.1e-07	2	5	AC006547.14	10
chr15:45571524-45571778	cg23904581,cg09092052,cg17252077,cg16921702,cg23416540	0.36	0.0483	5	7.4e-07	0	0	CTD.2651B20.3	21
chr21:15352211-15352642	cg18681837,cg00566515,cg11324748	0.38	0.110705	3	7.9e-07	0	3	ANKRD20A11P	19
chr12:7781091-7781289	cg10578777,cg14906510,cg25828445	0.41	0.074453	3	8.5e-07	0	0	.
chr5:146831805-146832258	cg05730183,cg04833034,cg08737836	0.54	-0.060239	3	1.1e-06	0	0	DPYSL3	66
chr10:29698366-29698463	cg16162391,cg14970695,cg08367083,cg03496709,cg19109608	0.96	0.067852	5	2e-06	1	0	PTCHD3P1	41
chr1:870956-871442	cg14156792,cg24997886,cg01727431,cg10146935,cg02439789	1	0.052089	5	0.0093	0	0	SAMD11	57
chr1:911599-912056	cg25107893,cg05505459,cg23635910	1	-0.07748	3	0.015	0	0	C1orf170	22
chr1:1365728-1365912	cg22351666,cg05235651,cg04865726	1	0.044047	3	0.018	0	0	.
chr1:2106220-2106401	cg15468976,cg27264462,cg23648809	1	-0.034316	3	3.6e-05	0	0	PRKCZ	301
chr1:2996018-2996651	cg25308086,cg12297125,cg00806481	1	0.032444	3	0.023	1	0	PRDM16	663
chr1:6514661-6515581	cg06085683,cg00158227,cg00833822	1	-0.037077	3	0.012	0	2	ESPN	66
chr1:16163477-16163968	cg24735235,cg04889800,cg19025461,cg01429859,cg25980637	1	0.053068	5	0.00022	0	0	RP11.169K16.9	35
chr1:16554556-16554985	cg16312002,cg07781491,cg11211795	1	0.033401	3	0.015	0	0	ANO7P1	22
chr1:17018585-17020879	cg14995274,cg25196716,cg23986148,cg02790620,cg11782634,cg04850659,cg07311615,cg27525446,cg01260170,cg15629460,cg21460394,cg18932417,cg01395667	1	-0.038124	13	0.0026	1	9	ESPNP	45
chr1:19600452-19601027	cg15948567,cg20677058,cg13935437,cg18202521,cg12798157,cg11376198,cg09045262,cg07162162	1	-0.032007	8	0.0015	1	1	AKR7L	13
chr1:19973880-19974177	cg18045201,cg03950225,cg14714346	1	0.052206	3	0.0021	0	1	NBL1,MINOS1.NBL1	43.7
chr1:20501244-20501734	cg11471442,cg04605617,cg21152304	1	-0.033305	3	0.032	0	0	PLA2G2C	15
chr1:27676120-27676653	cg01681396,cg03750567,cg00851518	1	0.039856	3	0.016	0	0	SYTL1	35
chr1:31654451-31654793	cg25010788,cg24455649,cg08847173	1	0.095165	3	0.009	0	0	NKAIN1	37
chr1:39407565-39407652	cg08209422,cg20088882,cg10500653	1	-0.051663	3	0.013	0	0	RHBDL2	29
chr1:40598646-40598780	cg13451356,cg16555417,cg16458866	1	0.033696	3	0.037	1	0	RP11.115D7.3	6
chr1:42611605-42611688	cg24998527,cg22816091,cg06092502	1	0.053582	3	0.0089	0	0	.
chr1:59043171-59043281	cg17210938,cg16080552,cg04863005,cg16699148,cg01821018	1	0.081129	5	0.049	0	0	TACSTD2	17
chr1:60280413-60280504	cg00210596,cg08231348,cg11792516	1	-0.036444	3	0.0081	0	0	HOOK1	25
chr1:63249195-63249214	cg09756865,cg24082680,cg22683036,cg06366791	1	0.046653	4	0.00054	0	0	ATG4C	17
chr1:75590481-75591354	cg01077724,cg01540595,cg01066472,cg00325531	1	0.090966	4	0.00051	0	0	RP11.510C10.4	3
chr1:78955821-78956383	cg08450478,cg04410756,cg15258025	1	0.052782	3	0.031	0	0	PTGFR	32
chr1:86044101-86044231	cg24724587,cg05690441,cg10593400,cg17108141	1	0.038357	4	0.0016	0	0	RP11.290M5.4,DDAH1	7.89
chr1:89459502-89459659	cg14669130,cg11309454,cg23627354	1	0.042128	3	0.0092	0	0	CCBL2,RBMXL1	34.3
chr1:93427689-93428119	cg26262605,cg15495124,cg18340013	1	0.041455	3	0.00039	0	0	FAM69A	40
chr1:110230250-110230402	cg11680055,cg16180556,cg24506221	1	0.117203	3	0.0065	0	1	GSTM2,GSTM1	30.14
chr1:110254601-110255097	cg02797771,cg25593510,cg25520068,cg05376982,cg20803293,cg25210835,cg24467349,cg12858902,cg14377951,cg23719124,cg22864244	1	0.063556	11	8.4e-06	1	6	GSTM5	72
chr1:110752045-110752258	cg20966270,cg16810724,cg02193146	1	-0.036408	3	0.041	0	0	KCNC4.AS1	19
chr1:120438923-120439037	cg23131777,cg22774211,cg16166968	1	0.0331	3	7.5e-05	0	0	ADAM30	14
chr1:143467658-143467824	cg03054846,cg04859241,cg04092883	1	0.031869	3	0.032	0	1	RP11.435B5.4	14
chr1:149908751-149908782	cg17353890,cg26645700,cg24620905	1	0.041207	3	0.00022	0	0	MTMR11	21
chr1:151105467-151106337	cg25583253,cg15336312,cg23280536	1	-0.032834	3	0.035	0	0	RP11.68I18.10,SEMA6C	12.33
chr1:153599669-153599832	cg13946767,cg11343894,cg27469660,cg11915664,cg11596404,cg19335413,cg02873163,cg02331910	1	-0.039856	8	0.021	0	0	S100A13,RP1.178F15.5,S100A1	49,47,29
chr1:156094661-156094953	cg07737038,cg15750163,cg13114683	1	0.031855	3	0.04	0	0	LMNA	82
chr1:156616777-156616856	cg10389771,cg16269733,cg25773262	1	-0.053696	3	0.00075	0	0	BCAN,RP11.284F21.7	32.27
chr1:161708997-161710014	cg23839599,cg11320225,cg18644227	1	0.037255	3	0.024	0	0	.
chr1:163038663-163038704	cg04053572,cg20056654,cg15923350	1	-0.040556	3	0.0002	0	0	RGS4	26
chr1:166459323-166459525	cg09755589,cg17665268,cg22100019	1	-0.04885	3	0.00032	0	2	RP11.276E17.2	5
chr1:169430051-169430465	cg15049744,cg25499552,cg20214464	1	-0.037469	3	0.045	0	0	CCDC181,RP1.206D15.3	24.9
chr1:177001734-177001904	cg13389323,cg25104727,cg18865685	1	0.044577	3	0.0088	0	0	ASTN1	49
chr1:196866320-196866513	cg20784841,cg15100757,cg10627839	1	0.060003	3	0.0029	0	0	CFHR2,CFHR4	18.12
chr1:207224563-207224741	cg05552307,cg15339972,cg05398095	1	0.041697	3	0.037	0	0	YOD1,PFKFB2	35.52
chr1:208425578-208426488	cg12895728,cg11318983,cg06191042,cg05566802	1	-0.039105	4	0.0004	1	0	.
chr1:213224391-213224443	cg07635306,cg14576824,cg23268653	1	0.030506	3	0.0043	0	0	RPS6KC1	34
chr1:223566445-223566795	cg17081027,cg21262649,cg26603179,cg22372182,cg02352904,cg27202708,cg05333568	1	0.030922	7	0.018	0	0	C1orf65	14
chr1:225117387-225117465	cg25379026,cg18701048,cg03940634,cg10174867,cg03199058	1	-0.042817	5	0.0002	0	0	DNAH14	29
chr1:228075421-228075750	cg13092405,cg12210914,cg10962762	1	-0.054325	3	0.023	1	0	.
chr1:228756709-228756790	cg10167378,cg16512390,cg18025438	1	0.104366	3	0.0011	0	1	DUSP5P1	24
chr1:244395113-244395353	cg26436731,cg18379829,cg05248971	1	0.05716	3	0.00084	0	0	.
chr1:247242512-247242929	cg18191060,cg26536593,cg08195981	1	0.035157	3	0.024	0	0	ZNF670	43
chr1:247537157-247537370	cg21397540,cg23226914,cg27305735	1	-0.067509	3	0.038	0	0	.
chr1:247681747-247681782	cg02713706,cg20771596,cg11166453	1	0.034006	3	0.00044	0	0	GCSAML	59
chr1:247802772-247802936	cg25220063,cg25017620,cg15829088	1	0.088399	3	0.034	0	0	RP11.978I15.10,RP11.634B7.4	28.36
chr1:248020690-248020813	cg23054189,cg20146541,cg07533148	1	-0.044801	3	0.0052	0	0	TRIM58	18
chr1:248100583-248101010	cg03748376,cg00785941,cg20507276,cg08944170,cg20433858	1	-0.104026	5	0.0012	0	0	RP11.438H8.8,OR2X1P,OR2L13	13,2,62
chr2:382088-382357	cg07160793,cg19710238,cg13170076	1	0.039805	3	0.016	0	0	.
chr2:468932-469106	cg22490454,cg26349358,cg13973086	1	0.053302	3	0.04	1	0	.
chr2:1817349-1817952	cg10075506,cg06201514,cg20302572,cg11454095	1	0.052883	4	0.049	0	0	MYT1L	246
chr2:3699332-3699564	cg20720597,cg14882966,cg17046650	1	0.058935	3	0.022	0	0	.
chr2:16154045-16154326	cg01430344,cg24694501,cg01601949	1	0.047959	3	0.0053	0	0	AC010145.4	27
chr2:20213108-20213314	cg10334703,cg05177637,cg12806822	1	-0.033874	3	0.012	0	0	MATN3	18
chr2:24397785-24397872	cg01343041,cg18587476,cg06482857,cg17277199,cg21778743	1	0.04577	5	0.00063	0	0	AC008073.7,FAM228A,RP11.507M3.1	19,20,41
chr2:24713155-24713284	cg04335293,cg15138109,cg03879180	1	0.031783	3	0.014	0	0	NCOA1	59
chr2:39470723-39470751	cg01583753,cg09834706,cg24062763	1	-0.031721	3	0.03	0	0	.
chr2:43327935-43328537	cg03125400,cg00881696,cg05672223,cg04981619,cg14706297,cg24601559	1	0.037468	6	0.00037	1	0	AC093609.1	13
chr2:43903468-43903808	cg09325404,cg11267669,cg14230606,cg09132607,cg02111748,cg18817560,cg13324389	1	0.044057	7	1.5e-05	2	0	AC011242.6,PLEKHH2	11.37
chr2:43903840-43904012	cg20563666,cg14454477,cg08726338	1	0.069655	3	0.005	0	0	AC011242.6,PLEKHH2	11.37
chr2:50201411-50201512	cg18396357,cg08415819,cg20062057,cg20536469,cg22322562	1	-0.03192	5	0.0032	1	0	NRXN1	141
chr2:74668670-74669049	cg00689340,cg03719070,cg26676034	1	0.036855	3	0.024	0	0	RTKN	32
chr2:74681553-74681806	cg17486538,cg26479323,cg03309722	1	0.035909	3	0.00092	0	0	INO80B	31
chr2:105853155-105853270	cg23676956,cg04850045,cg20265528	1	0.045533	3	0.0092	0	0	.
chr2:105853524-105853797	cg27422857,cg26874229,cg22878388	1	0.095428	3	0.0016	0	0	.
chr2:110371605-110371633	cg06850467,cg02177289,cg14102128	1	-0.045028	3	0.0089	0	0	SOWAHC,SEPT10	22.37
chr2:110372873-110373003	cg17866732,cg06665305,cg03552103	1	-0.033919	3	0.00077	0	0	SOWAHC,SEPT10	22.37
chr2:110969639-110971537	cg02169857,cg08570243,cg03250220,cg09068086,cg07888738,cg21885427,cg01487961,cg08898211,cg08444779	1	0.034698	9	0.0088	0	0	LINC00116	12
chr2:113542115-113542347	cg27606396,cg04859800,cg13953976	1	0.033344	3	0.0062	0	0	IL1A	11
chr2:114030822-114031855	cg02675527,cg05189103,cg09704166	1	-0.102638	3	0.035	0	0	AC016683.6,PAX8	56.66
chr2:114033358-114033582	cg25243455,cg06675538,cg01577475	1	-0.066405	3	0.0039	0	0	AC016683.6,PAX8	56.66
chr2:114737309-114737731	cg26867680,cg15915602,cg27087112,cg26077729,cg27585222	1	0.036649	5	5.4e-05	0	0	AC010982.1,AC110769.3	20.11
chr2:115419738-115420054	cg22670147,cg01622385,cg24654266	1	0.042185	3	0.003	0	0	DPP10	92
chr2:118616235-118617842	cg03288922,cg22762992,cg06940110,cg24213669,cg00046336,cg22545206,cg19095317,cg23829273,cg07643322	1	0.07678	9	0.0013	0	0	HTR5BP	15
chr2:118618052-118618594	cg08569850,cg19263433,cg08780339	1	0.032646	3	0.04	0	0	HTR5BP	15
chr2:128146129-128146475	cg16051415,cg09760422,cg24837355	1	0.050151	3	0.0016	0	0	AC068282.3,MAP3K2	12.26
chr2:129659314-129659947	cg06829154,cg12948059,cg04855401,cg18478731,cg11942181	1	0.032948	5	0.0066	0	0	.
chr2:130345203-130345406	cg05903289,cg19182557,cg14789551	1	0.041679	3	0.015	0	0	.
chr2:130986900-130986932	cg26763328,cg27022372,cg26170569	1	0.054229	3	0.015	0	3	AC018804.7	12
chr2:131094153-131094853	cg03748035,cg01331772,cg20964505	1	-0.036306	3	0.0018	0	0	.
chr2:131512766-131512891	cg19256400,cg05184394,cg26301353	1	-0.030732	3	0.026	0	0	AC140481.8,AMER3	27.32
chr2:132919538-132919866	cg20364988,cg15774040,cg22923398	1	0.03783	3	1.1e-05	0	2	ANKRD30BL	33
chr2:139537822-139537846	cg18150439,cg14923640,cg20331795,cg00804628	1	-0.042348	4	0.046	0	0	NXPH2	26
chr2:162099968-162101263	cg18049933,cg00599163,cg15237618,cg23987493,cg16506815,cg22496339	1	0.06902	6	0.013	1	0	AC009299.2,AC009299.3	35.9
chr2:176121916-176121928	cg01823663,cg11416274,cg19559372	1	0.032455	3	0.0018	0	0	AC096649.3	24
chr2:181845409-181845503	cg18455490,cg00949554,cg04807694	1	0.075286	3	5.2e-05	0	3	AC104076.3,UBE2E3	8.43
chr2:183942980-183943939	cg20988589,cg09632303,cg26744578,cg12925933,cg27029635,cg11601112,cg08641796,cg12484193,cg20443138,cg20721750,cg21364150,cg02551347,cg16653432,cg02561726	1	0.03971	14	2.9e-05	0	0	DUSP19	18
chr2:188898651-188899009	cg11902554,cg05782966,cg17475084	1	0.039071	3	0.043	0	2	AC068718.1	34
chr2:198650750-198651049	cg10124201,cg03774803,cg21866259,cg05783139,cg13356896,cg02957700	1	0.056841	6	0.02	0	0	BOLL	33
chr2:201599918-201600644	cg10912692,cg20517941,cg18472223	1	-0.109782	3	0.0057	0	0	AOX3P,AOX2P,AC007163.3	23,51,11
chr2:206628551-206628693	cg22308949,cg05348875,cg14157435	1	-0.034855	3	0.019	0	0	AC007362.3,NRP2	15.88
chr2:208989650-208989832	cg25257256,cg15411873,cg11463113	1	-0.039853	3	0.026	0	0	CRYGD	18
chr2:220108180-220108497	cg02258512,cg09715285,cg10602248,cg04945312,cg21893210,cg24061197	1	0.045033	6	0.00092	0	0	GLB1L	32
chr2:231067748-231067821	cg22577878,cg19764668,cg26857968	1	-0.036451	3	0.0012	0	0	SP110,SP140	48.69
chr2:231090327-231090532	cg17607231,cg10447678,cg03887528	1	-0.033058	3	0.024	0	0	SP110,SP140	48.69
chr2:233390769-233390860	cg05875017,cg20371266,cg22276371	1	-0.07442	3	0.015	0	0	CHRND	14
chr2:236923320-236923535	cg14226755,cg11007962,cg20128773	1	0.051329	3	0.0075	0	0	AGAP1	435
chr2:240240973-240241219	cg20434511,cg07673080,cg10639368	1	0.077333	3	0.0074	0	0	HDAC4	511
chr2:242851001-242851407	cg03765493,cg17988798,cg12941754	1	-0.034873	3	0.022	0	0	AC131097.3	242
chr2:242952826-242953819	cg17181966,cg14912375,cg15888463,cg08826919,cg09663145	1	-0.059959	3	0.027	0	0	AC131097.3	242
chr3:9289745-9289894	cg22956060,cg23958524,cg21386647	1	0.038547	3	0.00078	0	0	SRGAP3	159
chr3:9988142-9988663	cg02725398,cg01142302,cg16533830	1	0.050473	3	0.0035	0	0	PRRT3,PRRT3.AS1	25.25
chr3:10205717-10206255	cg07716603,cg27032569,cg04733838	1	0.030099	3	0.0034	0	0	IRAK2	50
chr3:16216043-16216216	cg18947710,cg23067317,cg18789887,cg15657925,cg13606421,cg10453019	1	0.070942	6	0.0047	0	0	GALNT15	34
chr3:27674459-27674538	cg13707894,cg23439966,cg01105833	1	0.032697	3	0.007	0	1	AC098614.2	8
chr3:32509016-32509040	cg00718400,cg19459454,cg13050802	1	0.046958	3	0.039	0	0	CMTM7	60
chr3:42977641-42978181	cg02648562,cg10118419,cg14794247,cg11555493,cg27084712,cg11303738,cg22714811,cg08111629,cg21104412,cg08364654	1	0.041708	10	0.00072	0	0	KRBOX1.AS1,KRBOX1,KRBOX1	21,102,102
chr3:46482947-46484380	cg04847265,cg13436782,cg21787089,cg01427108	1	0.093468	4	0.04	0	0	LTF	34
chr3:46618666-46619159	cg20941258,cg21489266,cg27371741	1	0.043001	3	0.042	0	1	LRRC2,TDGF1	57.4
chr3:46792355-46792463	cg08381504,cg09571950,cg23231268	1	0.052456	3	0.00065	0	0	PRSS50,PRSS45	63.37
chr3:51740620-51740897	cg22739025,cg25693132,cg21899500,cg00664406,cg04453050	1	-0.046569	5	1.1e-05	0	0	GRM2	35
chr3:51740954-51741474	cg26079664,cg12934382,cg00303541,cg21213853	1	-0.064372	4	0.00023	1	0	GRM2	35
chr3:53700139-53700277	cg15417641,cg00336149,cg21188533,cg13411554	1	-0.077851	4	0.0026	1	0	CACNA1D	110
chr3:74662848-74663025	cg11361636,cg23170439,cg00191178	1	0.036246	3	0.027	0	0	.
chr3:100712056-100712327	cg22532079,cg15028548,cg16163419	1	0.0394	3	0.025	1	0	ABI3BP	58
chr3:107810676-107810717	cg11741004,cg02487233,cg00492070	1	0.032097	3	0.019	0	0	CD47	27
chr3:113234508-113235016	cg18753928,cg11625897,cg10517650	1	-0.044888	3	0.013	0	0	SPICE1	23
chr3:133502621-133502910	cg02414224,cg17952877,cg03760072,cg08048268,cg01448562	1	0.057828	5	0.035	0	0	SRPRB	32
chr3:149094651-149095284	cg10725542,cg26306106,cg23379566,cg26584465,cg08124030	1	-0.056906	5	0.024	0	0	TM4SF1,TM4SF1.AS1	17.2
chr3:159557491-159559192	cg27400205,cg25705519,cg09345606,cg00188627,cg15180789,cg10088405,cg23553912,cg13447038,cg12020251	1	0.036213	9	0.00012	0	0	SCHIP1,IQCJ.SCHIP1	37.166
chr3:165555158-165555263	cg16102247,cg11482914,cg21995126	1	0.051061	3	0.028	0	0	BCHE	8
chr3:182816223-182818517	cg12518648,cg25441771,cg07634101,cg02616966,cg04991337,cg07464924,cg00161968,cg05496383,cg00890010,cg03318940,cg22801868,cg08395365,cg23166970,cg22211233,cg03344955,cg02570195	1	0.03138	16	0.019	1	0	MCCC1	47
chr3:186490342-186490729	cg12435415,cg22984571,cg21530419	1	0.039875	3	0.0016	0	0	RNU6.1105P,RP11.573D15.6	6.6
chr3:187870927-187871025	cg14091103,cg05685023,cg19599666	1	0.042361	3	0.0035	0	0	LPP.AS2,LPP	17.242
chr3:195578009-195578281	cg11601932,cg06047990,cg24858233,cg01797371,cg00555438	1	-0.032789	5	0.027	0	0	AC124944.5	24
chr4:124313-124345	cg22831726,cg12717203,cg21149944	1	0.048602	3	0.00044	0	0	Z95704.5,ZNF718	10.19
chr4:1398796-1399236	cg04651781,cg01181227,cg24980653	1	-0.085857	3	0.015	0	0	NKX1.1	18
chr4:3485324-3485462	cg17511472,cg25216704,cg19799339	1	-0.052533	3	0.009	0	0	DOK7	69
chr4:3704878-3705590	cg15642673,cg05254651,cg06668235	1	-0.039105	3	0.047	1	0	.
chr4:4863676-4864834	cg22609784,cg09573795,cg14769943,cg27597123,cg19596468,cg15848031,cg25144207,cg27038439,cg24840099,cg21538208,cg09748975,cg03843978,cg20891301,cg01785568	1	-0.036785	14	0.0092	0	0	MSX1	52
chr4:7033720-7033896	cg14107488,cg09907542,cg04567323	1	-0.042612	3	0.021	0	0	RP11.367J11.2,TBC1D14	36.138
chr4:7228266-7228443	cg05751839,cg21353189,cg08145989	1	-0.048834	3	0.048	1	0	SORCS2	391
chr4:8726629-8727475	cg08992249,cg08150668,cg15191795	1	0.046827	3	0.041	0	0	.
chr4:49519076-49519526	cg25244375,cg04473167,cg20778496	1	0.055194	3	0.04	0	3	.
chr4:69434473-69435602	cg20840634,cg07973162,cg13365324,cg10632656,cg07952421	1	-0.119858	5	0.013	0	1	UGT2B17	7
chr4:81111175-81111394	cg27111250,cg10129063,cg27639662	1	0.068906	3	0.00054	0	0	RP11.377G16.2,PRDM8	28.62
chr4:81111505-81111986	cg03404272,cg06440348,cg21082141	1	0.033099	3	0.00085	0	0	RP11.377G16.2,PRDM8	28.62
chr4:81117645-81118795	cg05452645,cg00138041,cg06373870,cg03463411,cg04235768,cg19409579,cg26299084,cg10694470,cg27018912,cg05059566,cg06307913	1	0.048007	11	0.0058	2	0	PRDM8	62
chr4:89152210-89153741	cg23706819,cg16432182,cg07292612,cg04265436,cg25102622,cg23118773,cg05454547,cg20558008,cg01594388	1	0.047579	9	0.01	0	0	ABCG2	40
chr4:103940709-103940879	cg13868111,cg05605371,cg19672271	1	0.040192	3	0.017	0	0	SLC9B1	23
chr4:106553470-106553850	cg09255157,cg00598449,cg06555230	1	-0.063374	3	0.0059	0	0	ARHGEF38	37
chr4:128704516-128704652	cg24312680,cg26356869,cg23415995	1	0.030127	3	0.015	0	0	HSPA4L	20
chr4:158141044-158141286	cg05181608,cg02757172,cg25837030,cg06129165,cg25184723	1	0.045925	5	0.024	0	0	GRIA2	39
chr4:174203059-174203406	cg19884032,cg04328001,cg13220973	1	-0.070363	3	0.0013	0	0	GALNT7	74
chr4:174422189-174422909	cg06132727,cg00699219,cg04840702,cg08125755	1	0.043046	4	0.00054	0	0	.
chr4:174537656-174539195	cg02545984,cg22461018,cg12279734,cg15902089	1	-0.056031	4	0.027	2	2	MORF4	4
chr4:184642623-184642972	cg26678138,cg22078781,cg08721802,cg12755745	1	0.041584	4	0.0043	0	0	.
chr4:185018389-185018683	cg07487572,cg17069313,cg10203211	1	0.032982	3	0.019	0	0	ENPP6	49
chr4:186732835-186733061	cg12309668,cg04392082,cg02790305,cg26785346,cg01933073,cg18342119,cg13921444,cg04348265	1	-0.05812	8	2e-05	0	0	SORBS2	159
chr4:187422112-187422337	cg16786756,cg21004358,cg18146936	1	0.057555	3	0.016	0	0	RNU6.1055P,F11.AS1,RP11.215A19.2	9,53,59
chr4:187984716-187985254	cg11271430,cg19632603,cg18870085	1	-0.052849	3	0.023	1	1	.
chr5:322703-322736	cg04369835,cg09454315,cg06802630	1	-0.039276	3	0.018	0	0	PDCD6,AHRR	101.174
chr5:1724890-1725824	cg03494017,cg10156587,cg15687530,cg15671987,cg26805720,cg07401067,cg01815292	1	-0.032587	7	0.037	0	0	CTD.2587M23.1	16
chr5:1867976-1868739	cg15595755,cg04156016,cg14773178,cg03686964,cg07747251,cg10534938,cg19770292,cg02344884	1	-0.03541	8	0.042	2	0	.
chr5:1887298-1887308	cg07565505,cg18561688,cg12039072	1	-0.040315	3	0.028	0	0	IRX4,CTD.2194D22.4	59.34
chr5:3326537-3326732	cg04675246,cg16185299,cg18443437	1	0.038373	3	0.0039	1	0	.
chr5:3394107-3394464	cg24955824,cg05340200,cg10613707	1	-0.034867	3	0.046	0	0	.
chr5:3787036-3787916	cg06345255,cg01927921,cg09491536	1	0.036397	3	0.02	0	0	.
chr5:16180066-16180077	cg17712694,cg16150752,cg21901718	1	-0.050186	3	0.016	0	0	RP11.19O2.2,MARCH11	23.36
chr5:23506736-23507753	cg04362002,cg10589310,cg25336267,cg19837938,cg02444433,cg22603366,cg09166973,cg07011961,cg25472530,cg22079902,cg01667892,cg05179993	1	0.055037	12	3.4e-05	0	4	PRDM9	15
chr5:27038800-27038847	cg11155432,cg07350977,cg06369005	1	-0.039684	3	0.00086	0	0	CDH9	23
chr5:50679145-50679152	cg16318053,cg08734740,cg11039614	1	-0.043263	3	0.014	0	0	ISL1,CTD.2314G24.2	39.42
chr5:54281269-54281734	cg06837426,cg20451680,cg20673840,cg21180956,cg13106512,cg24403549,cg10631947,cg20059697,cg16462183	1	0.034016	9	0.015	0	0	ESM1	25
chr5:64859517-64859940	cg08843802,cg19097359,cg19139096	1	0.045313	3	0.033	0	0	CENPK,PPWD1	27.25
chr5:75903395-75903701	cg27631597,cg20535450,cg16245467,cg15061656,cg21627658,cg08604223	1	-0.061674	6	0.0094	0	0	CTD.2236F14.1,IQGAP2	10.99
chr5:101119082-101119767	cg17598923,cg05545777,cg18665594,cg10455971,cg12197752	1	0.038458	5	0.023	0	0	.
chr5:102898221-102898730	cg07666882,cg02976617,cg13665998,cg03073264,cg06105925,cg20279471,cg09166085,cg07655627	1	0.032769	8	0.00081	0	0	NUDT12	14
chr5:110062341-110062838	cg23279021,cg17248924,cg11641395,cg06429214,cg25259944,cg20963261,cg22429640,cg19398821,cg27037608,cg17946588,cg10597099,cg19526166,cg26583412,cg06414816	1	0.053487	14	2.4e-06	2	0	TMEM232	63
chr5:114937917-114938003	cg22173752,cg10472270,cg01554060	1	-0.042736	3	0.033	0	0	TICAM2,TMED7.TICAM2,AC010226.4	50,50,28
chr5:126409151-126409212	cg27097438,cg22905511,cg10812634	1	0.058634	3	0.025	0	0	C5orf63	21
chr5:131593102-131593414	cg12564285,cg04518342,cg18301423,cg22638593,cg02033258,cg18758796	1	-0.037331	6	0.027	0	0	P4HA2,PDLIM4	99.31
chr5:135415188-135416614	cg00308130,cg15837280,cg07158503,cg04515200,cg13581155,cg11978884,cg11608150,cg06478886,cg04481923,cg18678645,cg06536614,cg25340688,cg26896946,cg00124993,cg08745965,cg18797653	1	-0.062442	16	0.00055	0	0	VTRNA2.1	8
chr5:135418204-135419020	cg12242038,cg12897067,cg05631625	1	0.099268	3	0.043	0	0	.
chr5:140306203-140306214	cg02105519,cg23953697,cg16400492	1	-0.031631	3	0.013	0	0	PCDHA1,PCDHA2,PCDHA3,PCDHA4,PCDHA5,PCDHA6,PCDHA7,PCDHA8,PCDHA9,PCDHA10,PCDHA11,PCDHA12,PCDHA13,PCDHAC1	298,278,261,242,222,211,189,173,155,143,100,85,69,50
chr5:140479791-140479980	cg06976770,cg17609028,cg18782991	1	-0.030511	3	0.041	0	0	AC005754.7,PCDHB3	16.21
chr5:140501533-140501662	cg02462812,cg08626876,cg03340754	1	-0.035175	3	0.038	0	0	PCDHB4	23
chr5:140514809-140515570	cg19568544,cg24583624,cg05579030,cg03349953,cg01851883	1	-0.033799	5	0.034	0	0	PCDHB5	18
chr5:140530307-140530468	cg04743250,cg23247945,cg06013769	1	-0.052577	3	0.001	0	0	PCDHB6	22
chr5:140536318-140536898	cg07821374,cg02804091,cg17585421	1	-0.043898	3	0.046	0	1	PCDHB17	17
chr5:140561065-140561246	cg13394331,cg24762111,cg08931687	1	-0.037637	3	0.04	0	0	PCDHB16	24
chr5:140804882-140806127	cg15443392,cg19754283,cg19345626,cg14681511,cg05670472,cg16316394,cg00888801	1	-0.041385	7	0.036	0	0	PCDHGB8P,PCDHGA9,PCDHGB6,PCDHGA10,PCDHGB7,PCDHGA11,PCDHGA1,PCDHGA2,PCDHGA3,PCDHGB1,PCDHGA4,PCDHGB2,PCDHGA5,PCDHGB3,PCDHGA6,PCDHGA7,PCDHGB4,PCDHGA8	14,200,189,174,157,134,443,426,403,384,366,347,330,307,292,274,255,235
chr5:140810104-140811103	cg21627409,cg02452944,cg12304520,cg07730329,cg11647681,cg07802710,cg02267483,cg21185686,cg14253517,cg22151446,cg09639151,cg23244790	1	-0.035599	12	0.0035	0	0	PCDHGA9,PCDHGB6,PCDHGA10,PCDHGB7,PCDHGA11,PCDHGA12,PCDHGA1,PCDHGA2,PCDHGA3,PCDHGB1,PCDHGA4,PCDHGB2,PCDHGA5,PCDHGB3,PCDHGA6,PCDHGA7,PCDHGB4,PCDHGA8	200,189,174,157,134,99,443,426,403,384,366,347,330,307,292,274,255,235
chr5:140857993-140858108	cg00589850,cg24024424,cg27639030	1	-0.037066	3	0.038	0	0	RN7SL68P,PCDHGA9,PCDHGB6,PCDHGA10,PCDHGB7,PCDHGA11,PCDHGA12,PCDHGC3,PCDHGA1,PCDHGA2,PCDHGA3,PCDHGB1,PCDHGA4,PCDHGB2,PCDHGA5,PCDHGB3,PCDHGA6,PCDHGA7,PCDHGB4,PCDHGA8	7,200,189,174,157,134,99,65,443,426,403,384,366,347,330,307,292,274,255,235
chr5:140864472-140864835	cg12648074,cg15949044,cg02022733,cg03640756,cg23445461,cg12145907	1	-0.044201	6	0.00035	0	0	PCDHGA9,PCDHGB6,PCDHGA10,PCDHGB7,PCDHGA11,PCDHGA12,PCDHGC3,PCDHGC4,PCDHGA1,PCDHGA2,PCDHGA3,PCDHGB1,PCDHGA4,PCDHGB2,PCDHGA5,PCDHGB3,PCDHGA6,PCDHGA7,PCDHGB4,PCDHGA8	200,189,174,157,134,99,65,42,443,426,403,384,366,347,330,307,292,274,255,235
chr5:141348200-141348280	cg08665853,cg21256257,cg15812759,cg24777028,cg23743252	1	-0.048556	5	5.8e-05	0	0	PCDH12,RNF14	40.43
chr5:149379418-149379651	cg08908145,cg26588194,cg19884619	1	0.057667	3	0.0024	0	0	TIGD6,HMGXB3	30.46
chr5:150326519-150326863	cg04755771,cg18428283,cg08747963	1	0.038118	3	0.041	0	0	ZNF300P1	15
chr5:151304815-151305112	cg25352328,cg11955641,cg11200917	1	0.057926	3	0.00022	0	0	GLRA1	30
chr5:159592079-159592697	cg18254016,cg12393605,cg05804568	1	0.093105	3	0.024	0	0	.
chr5:162863525-162866150	cg20638514,cg08970050,cg17381847,cg01893681,cg20477999,cg10852661,cg18020381,cg06646650,cg12879386,cg04232649,cg17876308,cg21592278,cg04084172,cg06625838,cg05540047,cg18419125	1	0.031013	16	0.0015	0	0	CCNG1,RP11.541P9.3	25.37
chr5:177915907-177916441	cg17444747,cg06515418,cg17429282	1	0.046799	3	0.035	0	1	COL23A1	249
chr5:178986129-178986907	cg19626725,cg00080972,cg25658438,cg21226059,cg14820908,cg06118287,cg02136620,cg01955137,cg08058472,cg20199595,cg09060608,cg05457628,cg22764044,cg26516362	1	0.049489	14	0.031	0	0	RUFY1	62
chr5:179740186-179741121	cg14794799,cg23221052,cg13944838,cg23248424,cg02891314	1	0.063644	5	0.00013	0	0	GFPT2	60
chr5:180231183-180231651	cg11850468,cg20399011,cg02039225	1	-0.03236	3	0.0038	0	0	MGAT1	66
chr5:180233831-180235801	cg18288193,cg13988652,cg22629626,cg01223400	1	-0.036287	4	0.04	1	0	MGAT1	66
chr5:180237083-180237223	cg13724780,cg11935018,cg17507374	1	0.0361	3	0.0013	1	0	MGAT1	66
chr6:291901-292386	cg03395511,cg18110333,cg05064044	1	0.088831	3	0.003	0	0	DUSP22	50
chr6:292520-292824	cg11235426,cg01516881,cg26668828	1	0.070957	3	0.0091	0	0	DUSP22	50
chr6:1619092-1619163	cg04763519,cg14354168,cg04565473	1	-0.036809	3	0.031	0	0	.
chr6:1619443-1621094	cg15030568,cg15476894,cg23817096,cg19592898,cg13549497	1	-0.046742	5	0.02	0	0	.
chr6:5087029-5087750	cg11574745,cg24920126,cg13207534,cg11092486,cg10563109	1	0.046397	5	0.035	0	0	PPP1R3G	12
chr6:8436216-8436467	cg09548084,cg02152351,cg15983580	1	0.032695	3	0.012	0	0	SLC35B3	17
chr6:10495221-10495436	cg13856384,cg12634245,cg20139336	1	-0.055895	3	7e-05	0	0	GCNT2	77
chr6:17016224-17016485	cg23525438,cg24071719,cg15242449	1	0.038953	3	0.023	0	0	.
chr6:24646674-24646783	cg02828016,cg00944873,cg16906346	1	-0.078861	3	0.041	0	0	KIAA0319	36
chr6:25732815-25732957	cg06532268,cg25753631,cg14480095	1	0.055906	3	0.013	0	0	HIST1H2BPS1,HIST1H2APS1	8.8
chr6:27185674-27186200	cg09817162,cg10279314,cg09395805,cg07555084	1	0.062845	4	0.0012	0	0	.
chr6:27706244-27706341	cg22537656,cg09508730,cg04612667	1	0.058447	3	0.041	0	0	RP1.97D16.1	4
chr6:27831705-27832181	cg09043250,cg01171339,cg09032630,cg16051742,cg06484167	1	0.038311	5	0.0067	0	3	HIST1H2BPS2,HIST1H2AL	16.17
chr6:28226883-28227128	cg21251018,cg00765128,cg18979916,cg13997680,cg17384889,cg18694169,cg10253847,cg01031101,cg09523275,cg18675097	1	0.046711	10	0.0025	0	0	NKAPL,ZKSCAN4	19.4
chr6:28446792-28447116	cg03350138,cg01792601,cg26968378,cg12584458,cg21903646	1	0.059833	5	0.019	0	0	.
chr6:28601269-28602514	cg07017437,cg25653641,cg22572476,cg19488431,cg27535677,cg22497095,cg26865747,cg03759229,cg13565129,cg14654363,cg00990380,cg12763978,cg09490294	1	0.039065	13	0.00068	0	1	RP11.373N24.2	27
chr6:29648159-29648453	cg25978138,cg11747594,cg15708526,cg04071440,cg08022281,cg10648573,cg12644888,cg22494932,cg25699073,cg07134666,cg00588198	1	-0.032417	11	0.031	0	0	ZFP57	34
chr6:29648505-29649025	cg16885113,cg20228636,cg11383134,cg03198009,cg03449857,cg15570656,cg02157626,cg13835168,cg08041448,cg24100841	1	-0.05	9	0.049	0	0	ZFP57	34
chr6:29723299-29723321	cg18280909,cg24900542,cg18505691	1	-0.059504	3	0.0026	0	0	.
chr6:31239241-31239267	cg18020334,cg18747378,cg24877963	1	-0.041993	3	0.031	1	1	HLA.C	41
chr6:31322119-31322349	cg27083089,cg15340334,cg23533285	1	0.066267	3	0.014	1	1	HLA.B	43
chr6:31913757-31913810	cg22670819,cg07421596,cg06060835	1	-0.033146	3	0.043	0	0	CFB,CFB	58.58
chr6:33560951-33561182	cg19735538,cg04329454,cg01392313	1	0.071639	3	0.0053	0	0	LINC00336	13
chr6:33872663-33872862	cg19884937,cg04502706,cg10072237	1	0.052911	3	0.01	0	0	RP3.468B3.2	71
chr6:37617862-37618010	cg20053110,cg24796644,cg26720545	1	-0.108133	3	0.0012	0	0	MDGA1	59
chr6:49681646-49681775	cg17731305,cg21710255,cg01706515	1	0.064035	3	0.0031	0	0	CRISP2	14
chr6:70991154-70991230	cg15922705,cg09961397,cg05221720	1	0.041887	3	0.025	0	0	COL9A1	43
chr6:80657540-80657827	cg16370875,cg08933227,cg04107099	1	0.040197	3	0.042	0	0	ELOVL4	18
chr6:93433254-93433629	cg00592460,cg18326274,cg20938507	1	0.034433	3	0.0091	0	1	RP11.127B16.1	4
chr6:139012990-139013147	cg06864789,cg25399239,cg18136963	1	-0.193819	3	0.00059	0	0	RP11.390P2.4,NHSL1	14.101
chr6:146660977-146661193	cg26103798,cg13192323,cg23376330	1	-0.033289	3	0.0029	0	0	RNA5SP222,GRM1	3.51
chr6:151411708-151412380	cg01354656,cg26774205,cg11579907,cg10395519,cg25955968	1	-0.033132	5	0.00046	0	2	MTHFD1L,RP1.292B18.4	111.38
chr6:152011397-152011512	cg18745416,cg08161546,cg25155098	1	-0.065219	3	0.044	0	0	ESR1	122
chr6:152011654-152012888	cg04211581,cg18007957,cg23050405,cg22157087	1	-0.04611	4	0.0015	0	0	ESR1	122
chr6:159360703-159360845	cg03739955,cg00788177,cg21583723	1	0.048027	3	0.025	0	0	.
chr6:160241103-160241557	cg27247736,cg17481235,cg21457401,cg03197101,cg15829665	1	-0.058111	5	0.00048	0	0	PNLDC1	30
chr6:168197175-168197506	cg16001811,cg23121394,cg23775883	1	0.063906	3	0.015	0	0	C6orf123,AL009178.1	19.12
chr6:170589481-170589898	cg19888017,cg03775991,cg12814571,cg00599530,cg13019844	1	0.043903	5	0.00097	0	0	.
chr6:170603680-170604218	cg22593006,cg18778248,cg10747815	1	-0.034147	3	0.019	0	0	FAM120B	88
chr7:31439-31498	cg05107246,cg15535638,cg20044143	1	0.064701	3	7.5e-05	0	3	.
chr7:187252-187340	cg02820566,cg20865618,cg25980689	1	-0.08843	3	0.00015	1	0	AC093627.12	35
chr7:194717-194799	cg05968904,cg12012581,cg12042135	1	-0.100062	3	0.013	2	0	AC093627.12,FAM20C	35.1
chr7:855004-855053	cg10666140,cg05155812,cg23108435	1	0.039082	3	0.0027	0	2	SUN1	176
chr7:948565-949391	cg25612754,cg19665696,cg14597098	1	-0.07944	3	0.04	0	0	ADAP1,COX19	139.189
chr7:1216822-1216934	cg17541715,cg27094323,cg17372657	1	0.089771	3	0.004	0	0	.
chr7:2728839-2728913	cg18285681,cg17317003,cg00881207	1	-0.035428	3	0.014	0	0	AMZ1	162
chr7:2764127-2764247	cg17393140,cg16478634,cg15247329	1	0.086169	3	0.0036	1	0	AMZ1	162
chr7:2802940-2802966	cg24648384,cg05793240,cg20884522	1	0.09027	3	0.0001	1	0	AMZ1,GNA12	162.132
chr7:4456309-4456593	cg21379460,cg06297367,cg04153130,cg20778547,cg11835459	1	0.052846	5	0.004	0	0	.
chr7:4848681-4848935	cg02779037,cg05867499,cg04314711	1	0.067835	3	0.036	0	0	RADIL	143
chr7:5111633-5111670	cg24626554,cg18848287,cg04336379	1	0.062357	3	0.022	0	0	RBAK.RBAKDN,RBAKDN	48.14
chr7:5271478-5271546	cg26660312,cg00579868,cg09203501	1	0.069898	3	0.00022	0	0	WIPI2	73
chr7:5552391-5552473	cg04953783,cg01940713,cg17903019	1	0.040131	3	0.013	1	0	FBXL18	104
chr7:26896338-26897715	cg16187319,cg20747577,cg11497410,cg07473340,cg12140851,cg03730533,cg10180281	1	0.036299	7	0.0024	0	0	SKAP2	54
chr7:27182635-27183817	cg05076221,cg23936031,cg09549073,cg04863892,cg09207400,cg19759481,cg02916332,cg17569124,cg02005600,cg25307665,cg14014955,cg02646423,cg20517050,cg23204968	1	0.04032	14	0.00089	0	0	HOXA3,RP1.170O19.22,HOXA.AS3,HOXA5	221,144,150,45
chr7:27253519-27253835	cg02063817,cg05756918,cg12187687	1	0.052044	3	0.005	0	0	.
chr7:29605895-29606986	cg10580293,cg23363754,cg18451588,cg06868100,cg20541039	1	-0.045615	5	0.023	0	0	PRR15	20
chr7:30635760-30635890	cg21429551,cg03068497,cg16875104	1	0.064613	3	3.5e-05	0	0	AC005154.6,GARS	46.39
chr7:38350919-38351227	cg15181598,cg06132400,cg25335841,cg07076816,cg00739278	1	0.057066	5	0.0064	1	0	AC006033.22	6
chr7:44079003-44079585	cg23814184,cg14743534,cg11307134	1	-0.060395	3	0.0016	0	2	LINC00957,RASA4CP	8.11
chr7:44104582-44105435	cg21448875,cg07075347,cg16627090,cg03470754,cg12631925,cg23616741	1	0.032785	5	0.005	1	0	AC017116.11,DBNL,PGAM2	11,51,16
chr7:45960365-45960866	cg06713098,cg14625938,cg07869380,cg23191657,cg08027385	1	-0.048458	5	0.0032	0	0	IGFBP3	48
chr7:47674567-47674906	cg01864991,cg08471925,cg04896115	1	-0.041676	3	0.0091	0	0	.
chr7:50518348-50518574	cg03731078,cg22303909,cg23111338	1	0.076845	3	4.1e-06	0	0	FIGNL1	15
chr7:51539321-51539584	cg06593753,cg07537562,cg08767820	1	0.073761	3	0.00033	0	0	.
chr7:56515508-56516130	cg03829739,cg18557149,cg03122674,cg07286216,cg24398379,cg26262573	1	0.052837	6	0.0027	0	0	RP13.492C18.2	13
chr7:63391461-63392088	cg07158230,cg13115376,cg19127541	1	0.041919	3	0.024	0	1	SLC25A1P3	6
chr7:72972277-72972507	cg05386606,cg27441048,cg05555294,cg03572677,cg14527128	1	0.033793	5	0.00098	0	0	BCL7B	26
chr7:76026999-76027102	cg08016802,cg20352798,cg15800530	1	0.054005	3	0.025	0	0	ZP3,SRCRB4D	42.35
chr7:80548454-80548696	cg03823904,cg12850675,cg11051843	1	-0.03409	3	0.015	0	0	SEMA3C	57
chr7:84002151-84002357	cg04326084,cg11911919,cg06577850	1	-0.034402	3	0.009	0	0	SEMA3A	80
chr7:91510445-91510598	cg01785046,cg09669835,cg10872641	1	0.054242	3	0.049	0	0	MTERF	27
chr7:91809042-91809118	cg23192873,cg01270444,cg01575061	1	0.034452	3	0.032	0	0	CTB.161K23.1,LRRD1	39.45
chr7:94285325-94285344	cg13266630,cg23616761,cg17701373	1	-0.033789	3	0.0085	0	0	PEG10,SGCE	104.93
chr7:99517458-99517510	cg02756107,cg16687213,cg25591451	1	0.032294	3	0.011	0	0	TRIM4	26
chr7:112727421-112727945	cg24786658,cg09506675,cg19382688	1	0.034691	3	0.013	0	0	GPR85	17
chr7:118498804-118498966	cg01881574,cg01783101,cg17749557	1	-0.037634	3	0.04	0	2	.
chr7:130126151-130126189	cg16511229,cg02169391,cg00317728	1	0.035441	3	0.04	0	0	RP11.2E11.10,MEST	10.9
chr7:130626374-130626560	cg04132407,cg09662496,cg15099666	1	0.035256	3	0.019	0	0	MKLN1.AS1	98
chr7:134464121-134464243	cg16253634,cg24956866,cg14009688	1	0.044855	3	0.0021	0	0	CALD1	102
chr7:135346060-135346503	cg00795791,cg24405174,cg17960959	1	-0.048342	3	0.034	0	0	C7orf73	30
chr7:138348772-138349444	cg05719902,cg16111924,cg19079272,cg13273418,cg10184328,cg23085143	1	-0.057121	6	0.024	0	0	SVOPL	41
chr7:150020123-150020926	cg03185704,cg18221429,cg07753583,cg22747650,cg10348193,cg11026333,cg01270001,cg22893248,cg21516287,cg02639123,cg02119840,cg11347411	1	0.063002	12	0.00034	0	0	LRRC61,ACTR3C	31.46
chr7:150705758-150706129	cg20498962,cg10501602,cg00700487	1	0.037266	3	0.012	0	0	NOS3	44
chr7:155556588-155556730	cg13639901,cg14430943,cg13904214	1	-0.034656	3	0.049	0	0	RBM33	92
chr7:156400709-156400785	cg16561657,cg18584424,cg12167907	1	-0.061849	3	0.0049	0	0	LINC01006	104
chr7:158045978-158047360	cg27200869,cg16571642,cg06715136,cg02770061,cg06400119,cg10473311,cg06497408,cg20235871	1	-0.034194	8	0.022	0	2	PTPRN2	1485
chr8:674432-674561	cg17179911,cg21650737,cg27048067	1	0.090018	3	0.00085	0	0	ERICH1	194
chr8:1365047-1365503	cg27134251,cg09050832,cg06008419,cg02490460	1	-0.042949	3	0.025	0	0	.
chr8:1713003-1713013	cg11322655,cg26702323,cg26975524	1	0.049697	3	0.00062	0	0	CTD.2336O2.1,CLN8	16.62
chr8:11141353-11141425	cg26272917,cg24378421,cg08623223,cg21337580	1	0.048551	4	0.023	1	0	CTC.493P15.2,MTMR9	4.34
chr8:17433623-17433793	cg07120993,cg05555116,cg18901963,cg15779323,cg25912517	1	-0.063675	5	0.02	0	0	PDGFRL	45
chr8:18078442-18078757	cg09152224,cg13828131,cg09102997	1	0.037002	3	0.015	2	0	NAT1	30
chr8:19333251-19333360	cg06699216,cg02988816,cg15923359	1	0.082691	3	0.0053	0	0	CSGALNACT1	139
chr8:19459670-19460244	cg15232539,cg17470251,cg05800416,cg06386478,cg19895047,cg26286961,cg04066265	1	0.032956	7	0.0069	1	0	CSGALNACT1	139
chr8:20161341-20161634	cg06915334,cg15190738,cg18593937	1	-0.050241	3	0.039	0	0	LZTS1	63
chr8:23563968-23564026	cg15854847,cg05477514,cg20892260	1	-0.034253	3	0.0041	0	0	NKX2.6,RP11.175E9.1	25.67
chr8:30012836-30013024	cg23406830,cg04374813,cg01128614	1	0.033409	3	0.019	0	0	LEPROTL1,DCTN6	47.21
chr8:43131533-43132126	cg03188390,cg15634698,cg06529685	1	0.058567	3	0.015	0	0	RP11.726G23.7,RP11.726G23.10	4.6
chr8:47108316-47109230	cg06417885,cg17451432,cg19944848,cg16420866,cg00406489	1	0.037991	5	0.024	0	0	.
chr8:52321551-52322138	cg06534901,cg06876964,cg01960936,cg00269553,cg20073313,cg13372743,cg27057652	1	0.033529	7	0.00042	0	0	PXDNL	57
chr8:57027285-57027353	cg27002178,cg00931742,cg00636390	1	0.035402	3	0.013	0	0	MOS	11
chr8:67090579-67090910	cg17305181,cg18640030,cg08215831,cg19035496,cg23409074,cg11699476	1	0.030554	6	0.033	0	0	CRH	21
chr8:93522097-93522272	cg07945197,cg21542345,cg24018262	1	0.042141	3	0.0004	0	0	RP11.587H10.1	7
chr8:94508148-94508435	cg15623175,cg03186975,cg17118836	1	0.059896	3	0.00082	0	0	LINC00535	99
chr8:104383713-104383725	cg04219247,cg20447655,cg20392240	1	0.039715	3	0.0022	0	0	CTHRC1	21
chr8:121137732-121138233	cg23158731,cg26626663,cg12065840,cg23586322	1	-0.033018	4	0.0068	0	0	COL14A1	52
chr8:125462976-125463067	cg07349283,cg09825146,cg26141173,cg11829072,cg25375711,cg26547947	1	-0.039464	6	0.015	2	0	TRMT12	12
chr8:141359672-141360556	cg06565641,cg11256152,cg14473837	1	-0.043317	3	0.0094	0	0	TRAPPC9	422
chr8:143545947-143546826	cg00713567,cg20063965,cg23189175	1	-0.030925	3	0.048	0	0	BAI1	117
chr8:144358041-144359075	cg22857963,cg14825413,cg24510518,cg06070970	1	0.04434	4	0.027	0	0	GLI4,ZFP41	22.7
chr8:144790408-144790730	cg11205981,cg09754549,cg08435853	1	0.03248	3	0.021	0	0	CCDC166,ZNF707	14.69
chr8:145638879-145639182	cg02583091,cg05681977,cg22088683,cg21788897,cg14228592	1	0.074232	5	0.013	0	0	SLC39A4	33
chr9:73566-73836	cg13624860,cg10792544,cg13550694	1	0.061293	3	0.019	0	2	RP11.143M1.7,RP11.143M1.2	6.5
chr9:34370833-34371381	cg01746241,cg13746854,cg01327147	1	0.038338	3	0.015	0	0	KIAA1161	25
chr9:38478531-38478902	cg24007638,cg06957414,cg14400763	1	-0.053019	3	0.0092	1	3	RP11.403F21.3	3
chr9:70971666-70971681	cg08073113,cg14697577,cg20025772	1	0.040339	3	0.0069	0	3	PGM5.AS1,PGM5	8.21
chr9:100850332-100850392	cg04823169,cg06290690,cg11317199	1	0.033416	3	0.0028	0	0	TRIM14	40
chr9:115821051-115822073	cg05927610,cg09646655,cg14999036	1	-0.041312	3	0.031	0	2	.
chr9:117691762-117692760	cg18390596,cg27631256,cg05185749	1	-0.036699	3	0.015	0	0	TNFSF8	21
chr9:123605227-123605307	cg13959647,cg13460057,cg09833538	1	0.061578	3	0.0081	0	0	PSMD5,PSMD5.AS1	17.17
chr9:126135167-126135999	cg02625222,cg11431402,cg15922174	1	-0.053071	3	0.00094	0	0	CRB2	28
chr9:130954398-130955437	cg15572469,cg10061204,cg10071929,cg13642260,cg09976142	1	0.050198	5	0.00059	0	0	CIZ1	42
chr9:134989510-134989863	cg12615327,cg08637691,cg26216217	1	-0.033608	3	0.024	0	0	.
chr9:137673049-137673895	cg13917918,cg14227731,cg13775295	1	-0.030999	3	0.015	0	0	COL5A1	149
chr9:139091841-139093218	cg14277923,cg15833797,cg08967938,cg21192468,cg25952247,cg08118114	1	-0.03739	6	0.017	0	0	LHX3	28
chr10:1195842-1196567	cg10370540,cg17603537,cg26207837,cg07514372	1	-0.04019	4	0.017	0	0	.
chr10:1601553-1602623	cg11594290,cg27429195,cg06837068	1	0.048583	3	0.0092	1	0	ADARB2	476
chr10:1851416-1851599	cg23694630,cg00792235,cg03402698	1	0.032053	3	0.0087	0	0	.
chr10:3133554-3134654	cg24754223,cg09551793,cg24236510	1	0.071719	3	0.027	0	0	PFKP	142
chr10:13481844-13481945	cg12390516,cg19411738,cg24686497	1	-0.068872	3	0.00011	1	0	BEND7	78
chr10:15038043-15038350	cg00964333,cg16345366,cg23997132	1	0.070036	3	0.0092	0	0	.
chr10:16563819-16564188	cg10982433,cg01866359,cg00267286	1	-0.031838	3	0.022	0	0	C1QL3	24
chr10:18430142-18430613	cg26272270,cg03634479,cg16726719	1	-0.05701	3	2.9e-05	0	0	CACNB2	109
chr10:18549534-18550230	cg26803268,cg14094927,cg18959207,cg02635932,cg26576398,cg22269608,cg15720089,cg21191915	1	0.062647	8	0.0085	0	0	RP11.109I13.2,CACNB2	19.109
chr10:18688394-18689949	cg23638399,cg08550689,cg03587042,cg18243536,cg07262635,cg25334928,cg25327888,cg12289251,cg24128066,cg16108246,cg14839147,cg05351658,cg05720640	1	0.036585	13	0.0028	0	0	CACNB2	109
chr10:23492468-23492915	cg02026141,cg06454152,cg00442109,cg15624813,cg00067824	1	0.044783	5	0.023	0	0	C10orf115	7
chr10:36053545-36054256	cg01082910,cg16919449,cg20152309	1	-0.037336	3	0.039	1	1	.
chr10:42862874-42863595	cg16449687,cg23026554,cg06833823,cg27119456,cg06739303,cg24527560,cg24598948,cg24714864,cg01485177	1	0.048346	9	0.00041	0	0	RP11.313J2.1	12
chr10:45359609-45359722	cg06188367,cg24969520,cg03444077	1	0.068415	3	0.012	0	0	TMEM72.AS1	84
chr10:47656771-47657325	cg10430941,cg11700221,cg14503272	1	0.040844	3	0.037	0	1	RP11.292F22.7,ANTXRL	8.22
chr10:50649648-50649796	cg09219931,cg16484473,cg24002541	1	0.04561	3	0.047	0	0	RP11.123B3.2	17
chr10:51572201-51572304	cg25794402,cg22758697,cg07588964	1	0.052811	3	0.0086	0	0	NCOA4	39
chr10:54538303-54538683	cg17334937,cg03716984,cg07745596	1	0.050408	3	0.00038	0	0	.
chr10:81106388-81106652	cg00357888,cg17037153,cg17073924	1	0.030913	3	0.029	0	0	PPIF	20
chr10:81892107-81892145	cg06049774,cg04451570,cg14991110	1	0.051036	3	0.0069	1	0	PLAC9	27
chr10:81967193-81967667	cg06813382,cg08880670,cg25660691,cg25677116,cg11647108,cg09614479,cg10775231	1	0.045956	7	0.003	0	0	LINC00857	12
chr10:93393026-93393049	cg18644675,cg12486537,cg26448681	1	-0.031736	3	0.025	0	0	PPP1R3C	22
chr10:99338054-99338189	cg13994504,cg27469738,cg25604594	1	0.032396	3	0.0025	0	0	ANKRD2	24
chr10:102322352-102322695	cg20461188,cg23351954,cg15966747	1	0.050362	3	0.0037	0	0	.
chr10:104372680-104373904	cg01370378,cg11161678,cg01357317,cg11920595	1	-0.054622	4	0.025	1	0	SUFU	70
chr10:105438006-105438069	cg04788957,cg21699381,cg19261727	1	-0.031469	3	0.00019	0	0	SH3PXD2A	196
chr10:114712693-114713188	cg09022607,cg27162705,cg11748187,cg00159523	1	-0.039071	3	0.038	0	0	RP11.57H14.2,TCF7L2	12.149
chr10:115860278-115860311	cg20703003,cg16734433,cg24756403	1	0.053567	3	0.0015	0	0	.
chr10:118084318-118084505	cg03472000,cg11290378,cg13836550	1	0.030233	3	0.014	0	0	CCDC172	16
chr10:120429060-120429206	cg24441440,cg01884141,cg02009353	1	-0.032577	3	0.0047	0	0	.
chr10:124638754-124639111	cg03804621,cg11218091,cg11216554,cg14708218,cg18195080,cg15252215	1	0.044938	6	0.038	0	0	CUZD1,FAM24B,RP11.564D11.3	49,35,19
chr10:127407604-127407769	cg19049077,cg26517151,cg08890360	1	0.053533	3	0.0092	0	0	RP11.383C5.5,C10orf137,RP11.383C5.4	17,35,25
chr10:128946440-128947231	cg01112499,cg08344422,cg14939821	1	-0.06311	3	0.00063	0	0	DOCK1,FAM196A	165.47
chr10:131989385-131989850	cg13945148,cg10969241,cg15638969,cg26187194,cg11372818	1	0.036332	5	0.017	0	0	.
chr10:134045512-134045610	cg01458105,cg19754622,cg16106427	1	0.073396	3	0.012	0	0	STK32C	186
chr10:134068303-134068465	cg08867390,cg05201403,cg27145048	1	-0.050908	3	0.014	0	0	STK32C	186
chr10:134915606-134915740	cg08485958,cg21136802,cg07907795	1	0.035837	3	0.033	0	0	GPR123	147
chr10:135122228-135122238	cg19126377,cg15220194,cg13178511	1	0.055371	3	0.003	3	0	TUBGCP2,ZNF511	107.98
chr10:135341441-135343249	cg05473257,cg03134882,cg13315147,cg19469447,cg00321709,cg10862468,cg25330361,cg23400446,cg24530264,cg18984983,cg05194426,cg11445109	1	0.056169	12	0.021	0	0	AL161645.2,CYP2E1,SPRN	13,48,139
chr11:325913-326357	cg09597767,cg03071500,cg11192219	1	-0.0495	3	0.0015	0	0	IFITM3,RP11.326C3.13,RP11.326C3.12	23,7,7
chr11:381864-382781	cg23027425,cg10517193,cg11461756	1	-0.036677	3	0.012	0	0	B4GALNT4	45
chr11:396684-397487	cg17840408,cg25258098,cg01794156,cg05510258,cg23012519	1	0.047625	5	0.02	0	0	PKP3	34
chr11:1767773-1768087	cg26241460,cg10900641,cg00530648	1	-0.05954	3	0.044	1	0	IFITM10	31
chr11:1773016-1773220	cg04430031,cg23135809,cg23776574	1	0.040683	3	0.0025	0	0	IFITM10,RP11.295K3.1	31.47
chr11:6291623-6292512	cg13580265,cg19364351,cg04467334,cg26313599,cg04585209,cg18706028,cg26700447	1	0.062397	7	6.9e-05	0	0	CCKBR	29
chr11:6414484-6415463	cg20230853,cg24568187,cg18477969	1	0.031656	3	0.019	1	0	SMPD1	17
chr11:7273044-7273379	cg16437728,cg03226737,cg18560328,cg02269161,cg22723056	1	-0.049823	5	0.011	0	0	SYT9	49
chr11:13508767-13509033	cg07033475,cg10554915,cg11976911	1	0.04638	3	0.04	0	0	RP11.15D14.2	3
chr11:13983007-13983706	cg23722437,cg23284931,cg08309747	1	-0.065989	3	0.03	0	0	SPON1	67
chr11:20620912-20621110	cg16635352,cg20551181,cg05645677	1	-0.03381	3	0.025	1	0	SLC6A5	45
chr11:27015517-27015657	cg10418755,cg02565993,cg07042914	1	0.070412	3	4.1e-06	0	0	FIBIN	10
chr11:27015806-27016672	cg07777008,cg15621260,cg04622802,cg01649773,cg13694680	1	0.036762	5	0.0036	0	0	FIBIN	10
chr11:30605647-30605788	cg18195560,cg19239270,cg13342435	1	0.039617	3	0.0069	0	0	RP5.1024C24.1,MPPED2	24.57
chr11:32417884-32417914	cg08540275,cg20641425,cg00806185	1	-0.05708	3	0.001	0	0	WT1	84
chr11:41481495-41481892	cg15681577,cg08072402,cg24638253,cg11382417,cg07895523	1	0.040793	5	0.00011	0	0	LRRC4C	87
chr11:43291041-43291211	cg26999154,cg05920383,cg06013378	1	0.030481	3	0.0039	0	0	HNRNPKP3	13
chr11:48284247-48285822	cg22827986,cg00939808,cg00791588,cg04721828,cg06173461	1	0.037567	5	0.015	0	0	OR4X1	5
chr11:58731152-58731434	cg13987879,cg12635602,cg03131724	1	0.049748	3	0.016	0	0	GLYATL1,RP11.142C4.6	49.31
chr11:58869661-58870076	cg15313325,cg01976784,cg26437112,cg11104828,cg16611234	1	0.033402	5	0.0042	0	1	.
chr11:61159600-61159688	cg17379860,cg16316624,cg20208600	1	0.034209	3	0.011	0	0	TMEM216	19
chr11:66193929-66194069	cg15273822,cg11635197,cg19568845	1	0.030641	3	0.044	0	0	NPAS4	18
chr11:67417956-67418366	cg11096993,cg01240599,cg04565008,cg06148175,cg00350199,cg25835179,cg09296957,cg12355172,cg04986336,cg23130075	1	-0.065041	10	4.8e-05	1	0	ACY3	20
chr11:68658381-68658970	cg21862992,cg06112835,cg21963583,cg00242965	1	-0.103224	4	0.00013	0	2	MRPL21	28
chr11:70508020-70508464	cg21202716,cg03578926,cg19942459,cg14537332,cg04396791,cg03395558,cg17627654,cg04110224	1	0.064477	8	0.0015	0	0	SHANK2	518
chr11:70516995-70517412	cg03679394,cg27643147,cg06223539,cg15177855	1	0.031644	4	0.043	0	0	SHANK2	518
chr11:72533293-72533665	cg13771313,cg04006327,cg00979931	1	-0.039807	3	0.016	0	0	ATG16L2	29
chr11:73668346-73669257	cg25368100,cg20737388,cg04044120,cg04950148,cg15670924	1	0.041238	5	0.035	0	0	DNAJB13	29
chr11:84634124-84634410	cg00846036,cg07520269,cg02707033,cg17096302,cg25066281	1	0.042585	5	0.048	0	0	DLG2	224
chr11:85393569-85394070	cg21480542,cg20544552,cg02687418,cg13906860,cg08675941,cg07187133	1	0.04526	6	0.0048	0	0	CREBZF	28
chr11:93822020-93822185	cg01091143,cg02814482,cg19970121	1	0.032639	3	0.015	0	0	HEPHL1	23
chr11:111847890-111848165	cg15925695,cg21169203,cg15050390,cg20816889,cg17446654	1	-0.053402	5	0.00028	0	0	DIXDC1	69
chr11:117069898-117070018	cg03276022,cg22692511,cg24319867	1	-0.055857	3	0.019	3	0	TAGLN	25
chr11:120856644-120856919	cg18247436,cg15174564,cg24255125	1	-0.065458	3	0.0011	0	0	GRIK4	189
chr11:121970723-121970769	cg03891346,cg24213115,cg07281370	1	0.035943	3	0.0095	0	0	MIR125B1,RP11.166D19.1	12.48
chr11:124737552-124738158	cg01283096,cg25196975,cg01094687	1	-0.03482	3	0.039	0	0	ROBO3	49
chr11:126872001-126872864	cg19299201,cg17534999,cg06504925,cg16652303,cg17273911	1	-0.051898	5	0.0014	0	0	KIRREL3.AS3,AP002833.1,KIRREL3	15,11,185
chr11:128559699-128561008	cg17571335,cg24075175,cg01973695,cg04002235,cg11886358	1	0.038334	5	0.024	0	0	FLI1	115
chr11:132107417-132107535	cg16594910,cg17187785,cg08214060	1	0.040811	3	0.041	1	0	NTM	296
chr12:726843-727335	cg14571491,cg03471195,cg12161182	1	-0.057028	3	0.03	2	0	NINJ2	88
chr12:1909103-1909964	cg01113710,cg21224286,cg12859507	1	0.06628	3	0.023	0	0	CACNA2D4	130
chr12:3566094-3566177	cg04941278,cg16746589,cg08799412	1	-0.031526	3	0.031	0	0	PRMT8	99
chr12:4488995-4489076	cg03581638,cg15747193,cg14119236	1	-0.03376	3	0.023	0	0	FGF23	18
chr12:4829593-4829828	cg05691448,cg02968094,cg03001012,cg22294288,cg14920334	1	-0.04386	5	0.0019	0	2	RP11.234B24.2,RP11.234B24.6,GALNT8	12,24,57
chr12:4918073-4919592	cg22087651,cg04504559,cg03240509,cg04030260,cg13188098,cg20010848,cg26162582,cg26858704,cg01175812,cg19870512,cg11224582,cg10671668,cg08380411	1	-0.039717	12	0.033	0	0	RP11.234B24.4,KCNA6,GALNT8	18,37,57
chr12:7592645-7593008	cg10915263,cg11296759,cg07520506	1	0.04207	3	0.022	0	1	RP11.157G21.2,CD163L1	6.29
chr12:14926570-14926987	cg12806797,cg26127836,cg01847718,cg07112131,cg09163005	1	0.058594	5	0.011	0	0	H2AFJ	18
chr12:29534623-29534983	cg09582351,cg08988832,cg16608935	1	0.036066	3	0.04	0	0	ERGIC2	21
chr12:31272110-31272120	cg17292337,cg10317314,cg14687298	1	-0.122866	3	0.0005	0	0	RP11.551L14.1	18
chr12:34551992-34552934	cg21451653,cg26024424,cg21383772	1	0.052042	3	0.0027	1	0	.
chr12:34754946-34755127	cg19839698,cg18047890,cg22538757	1	0.048485	3	0.00034	0	0	.
chr12:34756289-34756441	cg25343246,cg05196046,cg00148727	1	0.050909	3	0.015	0	0	.
chr12:41831530-41831596	cg03842440,cg15417244,cg20352371	1	-0.062552	3	0.019	0	0	RP11.413B19.2,PDZRN4	17.54
chr12:47225977-47226030	cg09792000,cg08005660,cg12075247	1	0.059796	3	0.012	0	0	SLC38A4	38
chr12:51786036-51786548	cg01568522,cg15127250,cg25360385	1	0.052119	3	0.014	0	0	SLC4A8,GALNT6	73.4
chr12:54324558-54324896	cg17410650,cg25024717,cg06087619	1	-0.032341	3	0.0016	0	0	.
chr12:54558272-54558300	cg19905308,cg04142929,cg20002756	1	-0.112667	3	0.00018	0	0	RP11.834C11.10,RP11.834C11.8	11.15
chr12:54954335-54954401	cg08816590,cg07681579,cg00660843	1	-0.052376	3	0.018	0	0	PDE1B	35
chr12:56040104-56040337	cg25695610,cg08013331,cg26417417	1	0.072603	3	0.003	0	0	OR10AE3P,RP11.644F5.16	6.17
chr12:75784853-75785296	cg00108944,cg23588049,cg12351126,cg02415057,cg07311024,cg02071292,cg15942481,cg21272279,cg17050806	1	0.030548	9	0.015	0	0	GLIPR1L2,CAPS2	15.6
chr12:86229802-86230404	cg06740227,cg02569458,cg00310523,cg25456477,cg08358620	1	-0.032406	5	0.00044	0	0	RASSF9	13
chr12:108634145-108634276	cg14639185,cg06837568,cg26132493	1	0.055365	3	0.016	0	0	WSCD2	52
chr12:109569082-109569131	cg16797699,cg00095930,cg20025086	1	0.033613	3	0.028	0	0	ACACB	73
chr12:119591662-119592036	cg26103179,cg27010159,cg01254303	1	0.077883	3	0.0013	0	0	SRRM4	54
chr12:127359912-127360730	cg16883901,cg13155387,cg27192018	1	-0.040693	3	0.031	1	0	RP11.983C2.2,RP11.983C2.3	8.8
chr12:130707330-130707408	cg01016191,cg03897452,cg20736492	1	0.065456	3	0.00022	0	0	.
chr12:130822284-130822604	cg13861644,cg27630820,cg19424457,cg11931211,cg24838063	1	-0.030705	5	0.016	1	0	PIWIL1	35
chr12:131057030-131057343	cg15360451,cg06697057,cg11893127	1	-0.105469	3	0.0091	1	0	RIMBP2	277
chr12:131118424-131118655	cg06777732,cg08164151,cg14140673	1	0.100482	3	0.00059	0	0	RP11.662M24.2,RIMBP2	95.277
chr12:131519996-131520096	cg25772418,cg11821532,cg26184673	1	0.034145	3	0.02	0	0	RP11.76C10.2,GPR133	15.236
chr12:132278428-132278511	cg09814354,cg03550075,cg01614703	1	0.053488	3	0.0002	0	0	SFSWAP	106
chr12:132690027-132690385	cg08802983,cg21759570,cg19598571	1	-0.035415	3	0.025	2	0	GALNT9	282
chr12:133003905-133004846	cg04741728,cg26524067,cg26572905	1	-0.042656	3	0.0071	0	0	.
chr12:133177073-133177547	cg18843258,cg27612324,cg23828686	1	-0.031997	3	0.0091	0	0	.
chr12:133179976-133180239	cg27537570,cg10036920,cg26621607	1	-0.053175	3	0.0029	0	0	LRCOL1	27
chr13:19918584-19919284	cg06722407,cg24592527,cg22859135,cg11108474,cg26406176,cg15509177,cg20935784	1	-0.052507	7	0.017	2	2	LINC00421,ANKRD26P3	12.13
chr13:20676230-20676797	cg02087298,cg02012327,cg21526187	1	-0.03445	3	0.048	0	0	LINC01072	4
chr13:20989140-20989350	cg07223180,cg02430645,cg11345143	1	-0.037051	3	0.023	1	0	CRYL1	70
chr13:21578682-21578734	cg24518553,cg17696184,cg18262682	1	-0.050386	3	0.038	1	0	LATS2.AS1,LATS2	11.68
chr13:21900390-21900811	cg13903179,cg04632378,cg19500098,cg00035636,cg10411590	1	0.045316	5	0.003	0	0	LINC00539	39
chr13:21951629-21952147	cg26751406,cg17521450,cg26392719	1	-0.040476	3	0.038	1	1	ZDHHC20.IT1,ZDHHC20	7.36
chr13:25506129-25506384	cg22558291,cg15812020,cg15145341,cg03649288	1	0.048848	4	0.038	0	0	TPTE2P1	12
chr13:42029944-42030094	cg16907049,cg10278931,cg24286613,cg25726150	1	0.032307	4	0.037	0	2	.
chr13:45563326-45563472	cg08225398,cg15611600,cg23580679	1	0.05907	3	0.038	0	3	NUFIP1,GPALPP1,RP11.321C24.1	30,24,40
chr13:47126298-47126446	cg01205267,cg11342437,cg19038230	1	0.030069	3	0.02	1	0	LRCH1	90
chr13:52769660-52769876	cg25692524,cg00201414,cg06259025	1	0.043259	3	0.027	0	0	MRPS31P5,RP11.248G5.8	18.26
chr13:96205895-96206105	cg25702335,cg24545961,cg05709657	1	-0.086075	3	0.041	0	0	CLDN10	73
chr13:97646895-97647223	cg01955239,cg24663970,cg21810047	1	0.033322	3	0.0015	1	0	OXGR1	15
chr13:100217922-100217996	cg15466234,cg05912299,cg14972141	1	0.051269	3	0.0016	0	0	.
chr13:100218550-100219014	cg17910899,cg20066226,cg13752184	1	0.076917	3	3.1e-06	0	0	.
chr13:113539205-113540558	cg17171260,cg01235591,cg21463262,cg14354398,cg01342572,cg17842918,cg21167985,cg11462099,cg26666292	1	-0.030669	9	0.037	3	0	AL356740.1,ATP11A	5.41
chr13:113818632-113819410	cg21508673,cg00898013,cg18105134,cg24300038,cg17845200,cg17895511	1	-0.058903	6	0.01	0	0	PROZ,RP11.98F14.11	28.3
chr14:19109061-19110298	cg23922973,cg01588177,cg20517615,cg05195083,cg05325567	1	0.033076	5	2.1e-05	0	5	RP11.754I20.1	6
chr14:19641331-19641453	cg00315280,cg20168315,cg23315518	1	0.034238	3	0.0097	0	3	CTD.2314B22.1	11
chr14:22278238-22279817	cg26170961,cg02027791,cg03042890,cg16423096	1	0.032882	4	0.045	1	0	TRAV9.1	4
chr14:23352251-23352489	cg25520324,cg17976873,cg24129115	1	0.052491	3	0.0076	0	0	REM2	14
chr14:23623478-23623936	cg05357695,cg19473656,cg08104568,cg01267709,cg26561526,cg01790464	1	0.030432	6	0.0047	2	0	SLC7A8	52
chr14:24438775-24439158	cg01216060,cg18659398,cg16779295,cg02358448,cg14214739	1	-0.065986	5	0.00046	0	5	DHRS4.AS1,DHRS4L2	2.35
chr14:24458206-24458346	cg01597387,cg10199763,cg20812929	1	-0.0595	3	0.0016	0	2	DHRS4.AS1,DHRS4L2	2.35
chr14:24779957-24780826	cg07760773,cg07509935,cg20007021,cg26310551,cg15364618,cg25576711,cg06796435,cg10193721,cg25448523,cg15545541,cg06823034,cg21886367	1	-0.034705	12	0.006	0	0	CIDEB,LTB4R2,LTB4R2,LTB4R	34,26,26,33
chr14:36973202-36973692	cg08086724,cg05134015,cg13209481,cg13012916	1	-0.037665	4	0.0045	0	0	RP11.896J10.3,SFTA3	70.4
chr14:38724644-38724676	cg25292550,cg16404157,cg05057720	1	-0.036134	3	0.0021	0	0	CLEC14A	16
chr14:63671312-63671738	cg11079896,cg07157030,cg01708150,cg07189587,cg18771300	1	-0.115393	5	0.013	0	0	RHOJ	30
chr14:69341137-69341906	cg00000289,cg11072851,cg27036347,cg01707795,cg15425276	1	-0.038788	5	0.0071	1	0	ACTN1	95
chr14:75390355-75390402	cg20682842,cg19841496,cg12643970	1	0.049819	3	0.004	0	0	RPS6KL1	32
chr14:78108466-78108577	cg21228500,cg19091403,cg02182594	1	0.033591	3	0.023	0	0	.
chr14:88621422-88621580	cg02222791,cg16288101,cg10172979	1	0.033356	3	0.014	0	0	RP11.753D20.1	17
chr14:93697772-93698417	cg08660994,cg16602316,cg06821828,cg12944343	1	0.058043	4	2.1e-05	0	1	.
chr14:97059190-97059350	cg24034005,cg06741112,cg01683794	1	-0.035618	3	0.0015	1	0	RP11.433J8.1	12
chr14:97206073-97206250	cg06300892,cg09374627,cg18199248	1	0.04698	3	0.041	0	0	RP11.433J8.2	17
chr14:101194143-101194749	cg09971646,cg19628497,cg18279536	1	0.054547	3	0.0044	1	0	DLK1	39
chr14:105287324-105287428	cg13581362,cg08111922,cg14152268	1	-0.049195	3	0.0078	0	0	LINC00638	13
chr14:105318277-105318495	cg25003922,cg19469722,cg19756885	1	-0.047223	3	0.0047	0	0	.
chr15:22833147-22833976	cg07959104,cg17809365,cg16707215,cg18106434,cg24525828,cg16639637,cg06756169,cg17121412,cg02478956,cg17161804,cg09762043,cg25490410	1	0.049942	12	0.0016	0	0	TUBGCP5	26
chr15:24672030-24672532	cg26288595,cg08449389,cg26708976	1	0.036026	3	0.018	0	1	.
chr15:29441828-29442170	cg18512553,cg13832135,cg25669249	1	-0.032667	3	0.029	0	0	FAM189A1	103
chr15:31515748-31516482	cg25556225,cg27438152,cg10854819,cg19559891,cg19666541,cg03330558,cg12689679,cg25017403,cg24860562	1	0.04427	9	2.2e-05	0	0	RP11.16E12.1,RP11.16E12.2	19.17
chr15:34516385-34516778	cg17618596,cg05180717,cg14433151,cg14847483,cg12949483	1	0.067642	5	0.0052	0	1	EMC4	13
chr15:37178199-37178770	cg26727768,cg11965311,cg01300467	1	-0.032212	3	0.041	0	0	RP11.122D10.1	33
chr15:39871921-39872038	cg25503381,cg10078511,cg08293324	1	0.048684	3	0.0029	1	0	THBS1	51
chr15:69323993-69324157	cg20532999,cg17073392,cg09453870	1	0.047842	3	9.8e-05	0	0	NOX5	59
chr15:70472703-70473626	cg27378762,cg12623445,cg15755490	1	0.037932	3	0.0053	0	0	.
chr15:74890731-74891031	cg13209071,cg25029670,cg03094193	1	-0.030896	3	0.005	0	0	CLK3	64
chr15:75019194-75019303	cg13570656,cg12101586,cg22549041,cg11924019,cg18092474	1	0.04744	5	0.037	0	0	CYP1A1	37
chr15:78110855-78111197	cg13271452,cg12363584,cg02259324	1	-0.039039	3	0.0084	0	0	LINGO1	157
chr15:79574674-79574848	cg01938189,cg23906060,cg24705646	1	0.031733	3	0.035	0	0	ANKRD34C,RP11.17L5.4	33.37
chr15:91208368-91208524	cg05609160,cg00756943,cg19553615	1	0.046188	3	0.011	0	0	RP11.387D10.2	54
chr15:98503945-98504174	cg17132421,cg00012522,cg05595345	1	-0.04322	3	0.028	0	0	ARRDC4	24
chr15:101389972-101390260	cg09785344,cg05500125,cg10405604	1	0.035429	3	0.015	0	0	RP11.66B24.2,RP11.66B24.7	25.26
chr16:279714-279747	cg21967601,cg26234137,cg27362010	1	0.041387	3	0.0071	0	0	Z69890.1,LUC7L	11.26
chr16:420228-420256	cg08923669,cg17422692,cg08296601	1	0.080362	3	0.00011	0	0	MRPL28	18
chr16:745683-745766	cg01003448,cg07482202,cg01195246	1	0.047286	3	0.0091	0	0	FBXL16	37
chr16:1121691-1121728	cg14083925,cg27392217,cg01404373	1	0.060483	3	2.8e-05	0	0	SSTR5.AS1,SSTR5	55.39
chr16:1583618-1584517	cg27594616,cg02193187,cg11375102,cg06602086,cg07341220,cg00463982,cg10465839,cg08296037,cg06565913,cg07639376	1	0.049753	9	0.035	0	0	TMEM204,IFT140	77.195
chr16:12010521-12010868	cg22278358,cg23721723,cg16151256,cg24764622,cg09805403,cg23525910,cg04426177	1	-0.031092	7	0.014	0	0	AC007216.1,GSPT1	15.39
chr16:20360215-20360498	cg21996068,cg09792189,cg00376654	1	0.030563	3	0.015	0	0	UMOD	26
chr16:22959523-22959876	cg01932956,cg03210314,cg08259413,cg00538458,cg22968966	1	0.046568	5	0.048	1	0	.
chr16:27279494-27279611	cg09327358,cg11675706,cg10512964	1	0.046871	3	0.017	0	0	CTD.3203P2.2,NSMCE1	23.52
chr16:34988836-34989178	cg13609285,cg08398596,cg06331400	1	0.038075	3	0.0082	0	0	RNA5SP421,RNA5SP422,RNA5SP423,5S_rRNA	7,10,10,4
chr16:50913872-50914025	cg21516550,cg08785784,cg10458473,cg13250243,cg08633959	1	0.03313	5	0.048	0	0	CTD.2034I21.2,CTD.2034I21.1	13.17
chr16:53407326-53407351	cg24278027,cg19691036,cg27310205	1	0.086129	3	0.0069	0	0	RP11.44F14.1,RP11.44F14.2	14.18
chr16:53407676-53407809	cg10144400,cg04653913,cg02380802	1	0.071635	3	0.0016	0	0	RP11.44F14.1,RP11.44F14.2	14.18
chr16:54228321-54228448	cg27520536,cg03687532,cg07506749	1	0.043937	3	0.00095	0	0	.
chr16:54619967-54620106	cg03221837,cg00010954,cg05835346	1	0.035065	3	0.049	0	0	.
chr16:55689532-55689866	cg27047406,cg20325131,cg10362591	1	-0.038191	3	0.014	0	0	SLC6A2	46
chr16:56995811-56995857	cg09889350,cg12564453,cg16660091	1	0.031594	3	0.00019	0	0	CETP	18
chr16:67686830-67687120	cg09482050,cg00510320,cg00452882	1	0.05602	3	0.02	0	0	RLTPR	28
chr16:68772223-68772470	cg01251360,cg24765079,cg09406989	1	0.050704	3	0.0079	0	0	CDH1	58
chr16:69966900-69966976	cg03549146,cg00158530,cg08209934	1	-0.056762	3	0.0016	0	0	MIR140,WWP2	9.113
chr16:71496733-71496984	cg09436545,cg04465772,cg13264964	1	0.040147	3	0.0088	0	0	ZNF23,AC010547.9,RP11.510M2.2	28,53,19
chr16:85368680-85368974	cg02016305,cg10066698,cg02418439	1	-0.072431	3	0.00044	1	0	.
chr16:86331578-86332382	cg26778630,cg05341384,cg07951728,cg06939438	1	-0.030612	3	0.036	0	0	.
chr16:86714763-86715000	cg02974204,cg02128086,cg00622128	1	-0.031773	3	0.0075	0	0	.
chr16:88766499-88766539	cg07268595,cg26315894,cg19396978	1	0.039932	3	0.00044	0	0	RNF166	48
chr16:90172729-90172817	cg20797188,cg09490556,cg04735481	1	0.037597	3	0.0081	1	3	RP11.356C4.3,FAM157C	6.12
chr17:154418-154672	cg11940040,cg10440639,cg23246911	1	0.133556	3	0.00081	0	0	RPH3AL	240
chr17:170873-172160	cg15809575,cg12742645,cg01282504,cg17780867,cg21909751,cg05231332,cg18290190,cg01760178,cg21518212,cg26730036	1	0.033958	10	0.00028	0	0	RP11.1260E13.1,RPH3AL	14.24
chr17:405176-406502	cg25882591,cg18727120,cg00416177,cg04370829,cg16835101,cg20547929,cg00430613,cg01214346	1	0.040944	8	0.00072	0	0	RP5.1029F21.3	12
chr17:1040651-1040976	cg05280794,cg18468019,cg07200871	1	0.045324	3	0.039	0	0	ABR	343
chr17:5403514-5403892	cg00343839,cg16558432,cg04241623	1	0.035966	3	0.04	0	0	NLRP1	64
chr17:6558229-6559110	cg24686902,cg08103988,cg21358336,cg08750459,cg17459443	1	0.13154	5	0.03	1	1	CTC.281F24.1,MIR4520A	9.5
chr17:7036932-7037099	cg18447972,cg11992241,cg08154612	1	-0.03927	3	0.0015	0	0	.
chr17:7253718-7254444	cg02676175,cg07148458,cg07520074	1	0.053709	3	0.048	0	0	ACAP1,KCTD11	27.16
chr17:15686292-15686474	cg14599729,cg11343211,cg08790676,cg02132284	1	0.037158	4	0.017	1	0	IL6STP1	6
chr17:16593515-16593583	cg07570663,cg25349314,cg04306489	1	0.062864	3	0.00025	0	2	CCDC144A,RP11.219A15.1	28.27
chr17:17109638-17109741	cg03292213,cg11392858,cg23661344,cg26539818,cg00572586	1	0.06859	5	0.0089	0	0	PLD6,RP11.45M22.4,MPRIP	24,69,149
chr17:20687679-20687762	cg02058408,cg08613577,cg20565374	1	0.050038	3	0.021	0	2	SCDP1	9
chr17:21792852-21793437	cg20303724,cg03264585,cg24697733	1	0.042066	3	0.04	0	1	RP11.1109M24.16,RP11.1109M24.5	4.11
chr17:21910473-21911492	cg20813927,cg06609220,cg14492302,cg21857867,cg08003956	1	0.031188	5	0.018	0	2	RP11.1109M24.8,RP11.1109M24.7,RP11.744K17.9	4,3,12
chr17:27044167-27044630	cg05668853,cg12873610,cg21816330	1	0.030525	3	0.041	0	0	RAB34	31
chr17:27045534-27045895	cg27547165,cg06756709,cg22833124	1	0.036583	3	0.023	0	0	RAB34,RPL23A	31.47
chr17:37011489-37011627	cg27500148,cg22230584,cg26419584	1	0.034007	3	0.00031	0	2	RPL23,RPS20P35	23.1
chr17:40937248-40937366	cg16631870,cg10653060,cg12808359,cg14457782,cg08409113	1	0.051884	5	0.019	0	0	WNK4	33
chr17:41277972-41278430	cg25067162,cg26276233,cg06001716,cg02286533,cg14947218,cg16006004,cg18372208,cg25288140,cg19454999,cg15065591,cg11529738,cg26370022	1	0.035756	12	0.0048	1	2	BRCA1,NBR2	59.52
chr17:42345486-42345613	cg03580247,cg03875157,cg24607642	1	-0.043895	3	0.025	0	0	SLC4A1,AC003043.1	25.19
chr17:42431107-42432489	cg15909132,cg17624802,cg09014329,cg23766254,cg22078805,cg19935040,cg05622422	1	-0.033582	7	0.026	0	0	FAM171A2	24
chr17:46681109-46682414	cg00072689,cg15435170,cg01986016,cg20471691,cg17179862,cg03803541,cg05900563,cg14230750,cg16848873,cg05888755,cg10906729,cg18684142,cg04588674,cg19828220	1	0.060265	14	3.7e-06	0	0	HOXB6,HOXB3,HOXB.AS3	51,208,210
chr17:48585214-48585271	cg11440486,cg20111217,cg00901687	1	-0.127023	3	2.4e-05	0	0	RP11.94C24.6,MYCBPAP	17.32
chr17:55064436-55064946	cg16003096,cg18463707,cg11129779	1	-0.037895	3	0.015	1	0	SCPEP1	28
chr17:56744330-56744491	cg01109337,cg15249796,cg05096467	1	0.043712	3	0.016	0	0	RNU1.108P,TEX14	6.76
chr17:71189056-71189069	cg26621869,cg06936436,cg26576875	1	-0.057029	3	0.0052	2	0	COG1,RP11.143K11.5	23.5
chr17:78417787-78417963	cg25447164,cg16980380,cg04305399	1	-0.031037	3	0.028	0	0	.
chr17:80337598-80337730	cg07016075,cg03889540,cg27196974	1	0.038572	3	0.049	0	0	.
chr17:80860248-80860508	cg04497611,cg10235845,cg25825612	1	0.05033	3	0.035	1	0	TBCD	410
chr17:81014007-81014414	cg26603910,cg08697732,cg25873514	1	0.064736	3	0.017	1	0	.
chr18:904241-904396	cg16288125,cg01637251,cg10846206	1	-0.05428	3	0.033	0	0	RP11.672L10.2,ADCYAP1,RP11.672L10.3	30,40,39
chr18:7011215-7011389	cg22220710,cg03691722,cg05836043	1	-0.053533	3	1.6e-05	0	0	LAMA1	51
chr18:9774446-9774873	cg21603178,cg20355084,cg14500151	1	-0.030108	3	0.026	0	0	RAB31	79
chr18:10702329-10702720	cg25164787,cg19844266,cg14535707	1	-0.098892	3	1.1e-05	2	0	PIEZO2	112
chr18:11850119-11850154	cg02618039,cg16299091,cg02755938,cg18848419	1	0.030734	4	0.015	0	0	CHMP1B,GNAL	19.116
chr18:12777784-12778030	cg23544223,cg09945482,cg24737193	1	-0.035283	3	0.04	0	0	.
chr18:19756580-19757023	cg27592331,cg12615165,cg13427880,cg02360939	1	-0.059445	4	3.2e-05	0	0	RP11.627G18.2,GATA6	7.41
chr18:21719261-21719468	cg18988170,cg25364343,cg20022589,cg14416559,cg26349976,cg08582629	1	-0.054407	6	0.029	0	0	CABYR	26
chr18:23713727-23713839	cg03162994,cg00262344,cg15865827	1	0.049363	3	0.0032	0	0	PSMA8	20
chr18:25757553-25757570	cg06090660,cg08927443,cg09319843	1	-0.064353	3	0.0092	0	0	CDH2	63
chr18:57566142-57566461	cg11957475,cg22549408,cg14685305,cg23084705,cg05157251	1	0.042915	5	0.023	1	0	PMAIP1	13
chr18:74799248-74799501	cg17199181,cg13572782,cg11598403	1	0.072644	3	0.0036	0	0	MBP	151
chr18:74960994-74961003	cg25165358,cg26065057,cg18461021	1	0.076265	3	0.0069	0	0	.
chr18:77616692-77616833	cg00383167,cg17490168,cg14294910	1	-0.031553	3	0.037	0	0	.
chr19:519033-519612	cg06595479,cg21450784,cg21177456	1	0.036846	3	0.0043	0	0	TPGS1	24
chr19:667452-667809	cg23874611,cg14186697,cg23433318,cg05581212,cg12106403	1	0.04774	5	0.0019	1	1	AC004156.3	19
chr19:3024505-3025666	cg07893425,cg17309880,cg07933682,cg17175421,cg10892268	1	-0.043932	5	0.048	0	0	TLE2	72
chr19:10172823-10172900	cg07749412,cg22597210,cg02505002	1	0.099991	3	0.00054	0	0	C3P1	21
chr19:13121569-13122450	cg04367503,cg11127915,cg05356319	1	-0.042258	3	0.027	0	0	NFIX	112
chr19:18234709-18234912	cg26325791,cg03594868,cg02814054	1	-0.032724	3	0.028	0	0	MAST3	63
chr19:21264894-21265422	cg01483656,cg19882830,cg17751872,cg01326874,cg15174294,cg06238316,cg09352518	1	0.152138	7	5.7e-06	0	4	ZNF714	14
chr19:21324805-21324850	cg11555228,cg20142672,cg04077732	1	0.038836	3	0.038	0	3	ZNF431	15
chr19:22235156-22235200	cg07352620,cg17555429,cg25360861	1	0.056225	3	0.005	0	0	ZNF257	15
chr19:29218099-29218775	cg04546413,cg14983838,cg12756686,cg06920399,cg12667521,cg03161606	1	-0.107466	6	0.00023	1	0	AC005307.3	36
chr19:31183590-31183873	cg25973545,cg24818159,cg06712755	1	0.051784	3	0.036	0	0	ZNF536	121
chr19:33622940-33622960	cg00366190,cg17764715,cg07827796	1	0.063921	3	4.6e-06	1	0	WDR88	29
chr19:34110629-34111401	cg09609470,cg03611088,cg22853855	1	-0.0392	3	0.035	1	0	CHST8	93
chr19:36485280-36485361	cg26643967,cg19389372,cg04579398	1	0.045252	3	0.0053	0	0	SDHAF1	14
chr19:36737176-36737272	cg17036741,cg05801999,cg21111121	1	0.064433	3	0.021	1	0	ZNF565	55
chr19:38794596-38794665	cg07665060,cg03049863,cg11708454	1	-0.04048	3	0.02	0	0	C19orf33,CTB.102L5.4	9.2
chr19:39466612-39467436	cg02772240,cg10443717,cg10742957,cg14206172,cg06247012,cg24010336,cg08844745	1	0.039127	7	0.024	0	0	FBXO17	37
chr19:45595004-45595812	cg15046935,cg01867142,cg01278903	1	0.030516	3	0.0088	0	0	CTB.179K24.3,MARK4,PPP1R37	24,196,50
chr19:46975060-46975181	cg21988244,cg27201673,cg14750269	1	0.053049	3	0.035	0	0	PNMAL1	13
chr19:50249462-50249777	cg22525294,cg26744682,cg03337057	1	0.04552	3	0.012	0	0	TSKS	28
chr19:50733983-50734288	cg14106680,cg02192974,cg11992783	1	0.045589	3	0.028	0	0	MYH14	75
chr19:50861772-50861924	cg00297876,cg22018083,cg06747330	1	0.040023	3	0.0029	0	0	NAPSA,NR1H2	12.73
chr19:52954613-52954838	cg20981451,cg13729816,cg05446675	1	0.03654	3	0.038	0	1	ZNF534	20
chr19:54945957-54946219	cg24365804,cg13123480,cg18593111,cg11788633,cg02086964	1	0.058018	5	0.0011	0	0	AC008746.3,TTYH1	9.35
chr19:55476540-55478263	cg01717586,cg20067405,cg15031253,cg13425888,cg25651476,cg00686667,cg13093842,cg04887076,cg17760849,cg19689876,cg24040502,cg20995778	1	0.073467	12	1.3e-05	0	10	NLRP2,NLRP7	36.35
chr19:55485035-55485207	cg03251378,cg27211295,cg22788909	1	-0.039926	3	0.021	0	1	CTC.550B14.1,NLRP2	4.36
chr19:56510963-56511150	cg26264314,cg24558194,cg15439294	1	0.081727	3	0.022	1	0	NLRP5	11
chr19:56905381-56905588	cg07778983,cg16941029,cg06668703	1	0.035703	3	0.033	0	1	ZNF582.AS1,ZNF582	17.15
chr20:443630-443654	cg14658867,cg07492518,cg15042888	1	0.030404	3	0.00042	0	0	TBC1D20	27
chr20:623087-623422	cg25539910,cg10277651,cg18803306	1	0.048848	3	0.026	0	0	.
chr20:2645088-2645128	cg08868391,cg23469025,cg27161589	1	0.031706	3	0.015	0	0	IDH3B,RP4.686C3.7	24.18
chr20:5485142-5485295	cg21235746,cg03287299,cg25958766,cg20295248,cg16763089,cg10831901	1	0.069723	6	6.4e-05	0	0	LINC00654	11
chr20:35169844-35169887	cg15371711,cg22853588,cg26287345	1	0.032963	3	0.041	0	0	RP5.977B1.7,MYL9	46.14
chr20:36156917-36156961	cg00216901,cg06133908,cg01082601	1	0.031004	3	0.0016	0	0	PPIAP3,BLCAP	8.125
chr20:47012989-47013920	cg00500770,cg07019386,cg18598695,cg00070912,cg25181043,cg20845336	1	0.046872	6	0.0064	1	1	RP1.66N13.1	7
chr20:49465259-49465723	cg00141838,cg26322579,cg03284132	1	-0.053043	3	0.0017	0	0	BCAS4	58
chr20:55401916-55402744	cg13683550,cg18394120,cg16569525	1	-0.049385	3	1e-05	0	0	.
chr20:57427470-57427504	cg07105596,cg27304369,cg26811638,cg26534489,cg08587534	1	0.031367	5	0.033	0	0	GNAS	213
chr20:57427554-57427651	cg14564778,cg01817393,cg02890368	1	0.056287	3	0.003	0	0	GNAS	213
chr20:57465437-57465449	cg25983380,cg07909402,cg03264550	1	0.055516	3	0.021	0	0	GNAS	213
chr20:61446960-61447039	cg18753958,cg11296498,cg07827435	1	-0.033443	3	0.0084	0	0	COL9A3	68
chr20:61732465-61732570	cg01735357,cg05780180,cg08389814	1	-0.045529	3	0.0052	1	0	HAR1B,HAR1A	17.15
chr20:61886067-61886080	cg05768532,cg15974634,cg08111446	1	-0.050734	3	0.0079	0	0	NKAIN4	59
chr20:62327966-62328428	cg23773946,cg14697761,cg07620230,cg24354818,cg16702083	1	0.080924	5	0.00017	1	0	TNFRSF6B,RTEL1,RTEL1.TNFRSF6B	9,65,57
chr20:62572873-62573078	cg01966791,cg11392297,cg07135405	1	0.067412	3	0.0027	0	0	MIR1914,UCKL1	8.49
chr20:62948035-62948236	cg19192585,cg24189721,cg09141953	1	-0.031524	3	0.014	0	0	.
chr21:15352846-15353880	cg02197629,cg27306467,cg06343169,cg10044179,cg08518507	1	0.074437	5	0.041	0	3	ANKRD20A11P	19
chr21:35831869-35832029	cg23480619,cg14535332,cg08823027,cg19521832,cg23908228,cg07321776	1	0.092965	6	0.00063	0	0	KCNE1	51
chr21:35899453-35899469	cg20710013,cg08975523,cg23093164	1	0.04812	3	0.011	0	0	RCAN1	80
chr21:37451801-37451850	cg01073521,cg25010248,cg08632701	1	-0.055179	3	0.0063	0	0	SETD4,AP000688.14	62.3
chr21:38629857-38630729	cg05126444,cg11287055,cg00628697,cg18380783,cg16704958	1	-0.057289	5	0.011	0	0	DSCR3	39
chr21:40361881-40362858	cg02515900,cg20721960,cg22133743	1	-0.039666	3	0.005	0	0	AF064858.8	12
chr21:44105263-44106234	cg23590273,cg16784985,cg18975948	1	0.046339	3	4.3e-06	0	0	PDE9A	88
chr21:44876602-44876688	cg02544658,cg00362657,cg27484412	1	-0.042839	3	0.0016	0	0	.
chr21:45705541-45706044	cg01323542,cg16501323,cg17356252,cg18689454,cg16717549,cg11923631,cg27251412,cg09510531,cg08089567,cg12843033	1	0.033356	10	0.012	0	0	AIRE	34
chr21:46074614-46074855	cg07018760,cg23624441,cg01598160	1	-0.058129	3	0.011	1	0	KRTAP12.4,TSPEAR	7.216
chr21:46975895-46976341	cg25211403,cg21139150,cg22851299	1	-0.101907	3	0.0052	0	0	.
chr21:47581040-47581559	cg05200811,cg11766577,cg13126279	1	0.08492	3	0.00035	0	0	SPATC1L	23
chr21:47604050-47605175	cg07747299,cg08742575,cg12016809,cg25545878,cg05896524,cg05672835,cg13704590,cg13012494,cg13732083,cg10296238	1	-0.106253	10	6.7e-06	2	0	AP001468.58,SPATC1L	10.23
chr21:48081255-48081687	cg02313909,cg21461082,cg24877093	1	0.059366	3	0.025	0	0	PRMT2	45
chr22:27834437-27834630	cg18875629,cg00941836,cg07226201	1	0.047314	3	0.016	0	0	.
chr22:30969812-30970730	cg17380689,cg07274898,cg27102378	1	-0.035847	3	0.012	0	0	GAL3ST1	35
chr22:36500564-36500794	cg06745364,cg04148237,cg08569266	1	0.037227	3	0.015	0	0	.
chr22:38244744-38244782	cg24578493,cg11245928,cg07059402	1	0.043072	3	0.0075	0	0	MIR659,ANKRD54,EIF3L	8,41,30
chr22:39784462-39784599	cg17813946,cg02038168,cg01416388	1	-0.049995	3	0.024	0	0	.
chr22:39784767-39784983	cg05872129,cg24399712,cg11247378	1	-0.11503	3	0.021	0	0	.
chr22:48314372-48314943	cg15914672,cg06511098,cg24997271	1	-0.079273	3	0.037	0	0	.
chr22:50753040-50753069	cg05217193,cg06375806,cg20435485	1	0.06288	3	0.0029	0	0	XX.C283C717.1,DENND6B	6.21
chr22:50986960-50987454	cg03957481,cg16443812,cg17174023	1	-0.032745	3	0.012	0	0	KLHDC7B	13
chr22:51039803-51041214	cg00083937,cg19808085,cg08173919	1	-0.031216	3	0.019	0	0	MAPK8IP2,CHKB	23.41
chrX:2886306-2886517	cg04484376,cg09891853,cg01170371	1	0.0929	3	0.0054	0	0	ARSE	15
chrX:3629714-3630408	cg05061041,cg17028443,cg25601949	1	0.041139	3	0.019	0	1	PRKX	43
chrX:37026362-37026474	cg02907441,cg26739410,cg02332456	1	0.035898	3	0.0033	1	2	FAM47C	11
chrX:48432150-48432363	cg11098911,cg03128268,cg12983165	1	0.06857	3	0.0054	0	0	AC115618.1,RBM3	21.24
chrX:72666534-72666944	cg21306843,cg23996156,cg19376305,cg12006363,cg12698064	1	-0.045846	5	0.0025	0	0	CDX4	16
chrX:74493318-74493423	cg12496847,cg00141845,cg20965292	1	0.031702	3	0.039	0	0	UPRT	15
chrX:75005074-75005097	cg27539023,cg05152459,cg11703777	1	0.054555	3	0.0061	0	0	MAGEE2	10
chrX:100672735-100673803	cg01118900,cg21786852,cg03657257,cg13484245,cg10950266,cg06980881,cg27293500,cg08460331	1	0.039936	8	0.028	0	0	ARMCX4	27
chrX:100740419-100740440	cg20085077,cg02800016,cg12452512	1	-0.051916	3	0.019	0	3	ARMCX4	27
Table S3: DMRs between responders and non-responders to lifestyle intervention including data sets from both time points. Top candidate DMRs (adj. P≤0.05) are marked with dark grey. deltaM represents the difference of the mean average methylation rates between responders and non-responder as computed by metilene. The 2D-KS p-value represents a two dimensional variety of the Kolmogorov-Smirnov tes…

## Sheet: Table S4
Table S4: Candidate genes from GWAS and methylation differences in adipose tissue
				subjects with obesity vs. subjects without obesity in adipose tissue depots (Keller et al, 2016)
GWAS cataloge hits				MethylationAdipose tissue		Methylation/Expression Adipose tissue
BMI	WHR	WC	T2D	SAT	OVAT	SAT	OVAT
AATK	ABR	ACAN	ACSL1	ACTR3C	ARHGEF38	CAST	ASTN1	responder vs. non-responder DMRs (2D-KS P<0.01)
AC007319.1	ABTB1	ACTN4	AGAP1	ATG4C	ARSE	CCR1	BLCAP
AC016903.2	AC007319.1	ADCY9	AKAP6	BLCAP	ASTN1	CYHR1	C12orf39
ACOX1	ACVR1C	AGBL4	ALK	C17orf67	BLCAP	DENND2A	COL4A5
ADAM19	ADCY3	ANKS1B	ANK1	C17orf96	C12orf39	ETV6	CPE
ADAMTS2	AGBL4	ARHGAP26	ANK3	C21orf49	C14orf166B	FAM46A	CYGB
ADAMTSL1	ANK3	ARL15	ANO4	C21orf88	C17orf67	IQGAP2	DHRS4L2
ADARB2	ANKRD28	ATP2C1	AP3S2	C3orf20	C6orf123	LAMA2	DUSP22
ADCY3	ANKRD6	CAND2	ARHGEF3	C6orf123	C8orf4	LIMCH1	LEF1
ADCY9	ANKS1B	CHN2	ARL15	C8orf4	C9orf131	NET1	MAL
AGAP1	ARFGEF1	CHST11	ASCL2	C9orf131	CACNA1C	NTRK2	NET1
AGBL4	ARID5B	COLGALT2	ASTN1	C9orf89	CACNB4	PTPRF	PDE8B
AKAP6	ARL15	CPQ	ATP1B2	CA6	CAPN3	RNF130	PDK2
AL355490.1	ASTN2	CROCC	ATXN7	CACNA1C	CCDC137	RUNX1	PTPRF
ALK	ATP2B4	DNAH17	ATXN7L1	CACNA2D1	CCDC67	SLAMF8	RGMA
ANK3	ATXN7L1	EIF3H	AUTS2	CAPN3	CCNDBP1	SLC1A4	RGS17
ANKRD26	BCL2	ESR1	BCL2	CAST	CCNG1	SPP1	SORBS2
ANKRD28	BDNF	EYA1	BICC1	CCDC40	CENPJ	TTLL7	WT1
ANKRD6	BICC1	FGFR4	C2CD4B	CCDC57	CEP170	ZHX3	WWC1
ANKS1B	BMPR1B	FNDC3B	CACNA2D1	CCR1	CHST11
AP001042.1	BNIP3L	FTO	CACNA2D3	CDIP1	CLDN20
ARHGAP15	C14orf39	GNA12	CAMK1D	CDK18	CLEC14A
ARL15	C17orf67	GNAS	CBX7	CDX4	CLSTN2
ARNTL	C19orf47	GRM1	CD81	CELF2	COL4A5
ASCC3	CADPS	HAPLN1	CHST6	CENPJ	COLGALT2
ASIC2	CAND2	HECTD4	CMIP	CETN3	COMT
AUTS2	CCND1	IL1RAP	CPA6	CFTR	CPE
B4GALT5	CD34	IQCJ-SCHIP1	CPQ	CHD2	CPQ
BACE2	CDH13	ITGB6	DENND2C	CLDN20	CSGALNACT1
BACH1	CLDN20	JAZF1	DLEU1	CLN8	CSTF2T
BCL2	CMIP	KCNQ1	DUSP9	CLSTN2	CYGB
BDNF	CNTN2	LDB2	EGFLAM	CMSS1	CYLD
BMPR1B	CNTN5	MTMR11	EHMT2	CMTR1	CYP1B1-AS1
BRCA1	COL14A1	NELL2	EML2	COL11A2	CYP2B6
CACNA1C	COL8A1	NUCB2	ERN1	COL18A1	DAB2
CACNA1D	COL9A3	NXN	ETS1	COLGALT2	DCUN1D1
CACNB2	CPNE4	PCED1B	EXOC6	CREBBP	DFFA
CADPS	CUEDC1	PDLIM5	EYA2	CREM	DGKZ
CAMTA1	CUX1	PEPD	EYS	CUX1	DHRS4L2
CAST	CYBRD1	PRKCD	FAM167A	CYGB	DLK1
CASZ1	CYP19A1	PTPRK	FBRSL1	CYHR1	DOCK9
CDH13	DAB2	RPS6KA2	FBXL7	CYP3A7	DPF3
CERS3	DAND5	SCUBE1	FGF14	DCHS2	DPP10
CHFR	DIRC3	SEMA3A	FGFR4	DCUN1D1	DPY19L2P2
CMIP	DLEU1	SH3PXD2A	FTO	DENND2A	DPY19L3
CNTNAP2	DLG2	SLC43A2	GABRG3	DGKZ	DPYSL3
COMT	DNAH17	SMAD3	GATAD2A	DIXDC1	DQX1
CPNE4	DOCK2	SYT3	GLP2R	DLEU1	DUS2
CRB2	DOCK6	TBX15	GNAS	DMXL2	DUSP14
CRYL1	DPP4	TBX4	GNG7	DNAI1	DUSP22
CSNK1G2	DPYD	TCF7L2	GRK5	DPYD	DXO
DDAH1	DYM	TGFB2	HECTD4	DPYSL3	EFNA5
DENND1A	EBF1	TMEM18	HECW1	DQX1	EHD1
DGKI	EBF2	ZMIZ1	HSD17B12	DST	ELAVL4
DLEU1	ECE1	ZNRF3	HTT	DUSP10	ELF1
DLG2	EDEM2		IGF2BP3	DUSP22	EML1
DLG4	EPHB1		IMP3	DUSP5P1	ENPP7
DMXL2	EYA1		INSR	DXO	ERBB4
DNAH14	EYA2		JAZF1	DYNLL2	ERG
DNAJC11	FGFR4		KCNQ1	EFNA5	ERN2
DOCK1	FNDC3B		KSR2	EHD1	ETF1
DOCK2	FTO		LAMA1	EIF2AK2	ETV4
DPF3	GRB2		LHPP	ELAC1	EXOC6
DPP4	HECTD4		LRP1B	EML4	FAM19A2
DPYD	HMBS		MAEA	ERBB4	FAM200A
DTX2P1	HMGB1		MAGI1	ERG	FAM228A
DYSF	HNRNPR		MARCH1	ERN2	FAM69A
EBF1	HOXC13		MBNL1	ETF1	FANCF
ECE1	HTT		MRPL19	ETV6	FBXL7
EFEMP2	IGFBP3		MRPS35	FAM118A	FBXO16
EFNA5	IL20RB		MSH3	FAM120B	FBXO18
EHBP1	INSR		MYO1E	FAM171A2	FGFR4
EHMT1	IQGAP2		NAT1	FAM196A	FHL2
EIF3H	ITGA11		NDUFAF6	FAM217A	FRMPD1
ELAVL4	ITGA7		NFKBIL1	FAM46A	G3BP1
ENO4	JAZF1		NRXN1	FARS2	GABBR1
EPHA4	KCNQ1		NTRK2	FBXO16	GALNT15
EPHB1	LAMA4		NTRK3	FBXO18	GATA2
ERBB4	LIN52		NUS1	FIGNL1	GATA3
ERC2	LINC00511		NXN	FOXC2	GCNT2
ETF1	LITAF		OASL	FOXM1	GGPS1
EVI5	LRRC1		PANX2	FUBP1	GLIS1
EYS	LRRC3B		PBX4	G3BP1	GLP2R
FAM120A	LUZP2		PCGF3	GABPB1	GNE
FAM155A	MACROD1		PCSK6	GADD45A	GPR133
FHL2	MAP3K3		PEPD	GALNS	GSTM1
FIBCD1	MAPKBP1		PIEZO2	GALNT15	GSTM5
FMN2	MAST4		PINX1	GATA6	HAAO
FTO	MEGF8		POU2F1	GCM1	HAL
FUT8	MEIS1		PPARA	GCNT2	HAPLN1
GAB2	MEIS2		PPP2R2C	GCSAML	HBE1
GALNT16	MLLT10		PRKAG2	GLIS1	HCG14
GLRA1	MPPED2		PROX1	GPBP1	HCN1
GNAQ	MPRIP		PRPF31	GPN1	HECW1
GRIA1	MSRB3		PSMC2	GPR98	HGF
GRID1	MYH11		PTPRN2	GRID1	HIF1AN
GSK3B	MYL4		RASA1	GTDC1	HLA-DPB2
GTF2A1L	MYO3B		RBL2	H2AFY	HLA-F-AS1
HECTD4	NCAM1		RBM19	HAAO	HMGN1
HIP1	NRIP3		RHOU	HCN1	HMGN5
HIVEP2	NUCB2		ROR2	HDAC4	HOXC6
HIVEP3	OLFM2		RREB1	HGF	HSP90AA1
HMGB1	OPCML		SCTR	HIPK1	HSP90AB1
HSD17B12	PBX1		SEC11C	HIST1H1E	IL12A
IGHMBP2	PDCD6IP		SH2B2	HLA-DPB2	INTS6
INPP4B	PEPD		SLC16A13	HLA-F-AS1	ITGA11
ITPK1	PHTF2		SLC1A2	HLA-J	JARID2
JAKMIP2	PIGC		SLC22A18AS	HOXA3	KATNAL2
JAKMIP3	PINX1		SLC9B2	HOXB3	KBTBD3
JAZF1	PKD1		SPTB	HOXB6	KCNA2
KCND3	PLCE1		STARD7	IGHMBP2	KCTD1
KCNMA1	PLXND1		STARD9	IGSF10	KDR
KCNQ1	PRDM16		TCERG1L	INTS6	KIAA0513
KIRREL3	PRMT6		TCF12	INTS6-AS1	KIAA0825
KLF7	PROX1		TCF7L2	IQGAP2	KIAA1324
KSR2	RBL2		THADA	ITGA11	KIF20A
LDB2	RERE		TMEM18	JAKMIP2	KLHL1
LINC00458	RFX4		TNFAIP6	KATNAL2	LEF1
LINC00461	RNA5SP224		TTLL6	KCNA2	LIFR
LINGO1	RORA		UHRF1	KIAA0895	LIN52
LMO1	RRAS2		USP3	KIAA1324	LINC00670
LPP	RREB1		USP48	KIRREL3	LRP1B
LRP1B	RUNX1		WT1	KIRREL3-AS3	LRRC4C
LRRC7	SCGB3A1		XYLT1	KLHL1	LURAP1L
MACROD1	SIK3		Y_RNA	KMT2D	LUZP2
MAP2K1	SLC38A9		ZFAND3	KY	MAD1L1
MAP3K12	SLCO3A1		ZHX3	LAMA2	MAL
MAP3K3	SMAD3		ZIC1	LAMA4	MAPKAPK2
MAPKBP1	SSR3		ZMIZ1	LDB2	MARCH10
MARCH6	STAB1		ZNF257	LIMCH1	MARK2
MARK4	STOML3			LINC00478	MBNL1
MAST4	STON1-GTF2A1L			LINC00670	MCF2L
MCTP1	TBX15			LOR	MECP2
MEGF11	TBX4			LRRC1	MFAP1
MFAP3	TCEA3			LRRC6	MIR5188
MLLT10	TCF7L2			MAEA	MLLT4-AS1
MPPED2	TEX9			MAPKAPK2	MPPED2
MSI2	THADA			MARCH10	MRPL21
MTOR	TIMP2			MBNL1	MRPL42
MYO10	TMEM18			MCTP1	MSRB3
MYO1E	TNRC6B			MGAT1	MST1
MYO3B	TP73			MGAT4C	MSX1
NAALADL2	TRIM8			MGST1	MT1A
NADK	TSPAN9			MIPOL1	MTUS1
NBL1	TTC28			MIR484	NAT1
NCAM1	UGGT2			MMP20	NDUFAF6
NOTCH4	USP3			MPPED2	NET1
NPAS3	WT1			MRPL21	NEUROD1
NREP	WWP2			MST1L	NHSL1
NRXN1	Y_RNA			MSX1	NME2
NTM	ZHX3			MT3	NR2F2
NTRK2	ZMIZ1			MTHFD1	NREP
NUDT3	ZNF268			MYH3	OR1A2
NUP160	ZNRF3			MYO1B	OR2H2
OARD1				NAT1	OXLD1
OPCML				NCAM1	OXR1
OSBPL10				NCK2	PACRG
PAFAH1B2				NDE1	PCDHGB8P
PARD3B				NDUFC1	PCED1B
PAX5				NEB	PCSK1
PAX6				NEDD4	PDCD4
PAX7				NET1	PDE4D
PAX8				NHLH2	PDE8B
PDE10A				NHSL1	PDK2
PDE1C				NOL8	PDP2
PDE4B				NR2F2	PDZD2
PDZD2				NRP2	PIGC
PEPD				NTRK2	PITPNB
PHACTR1				OFD1	PITX2
PLCG1				OR2H2	PLCG1
PLCL1				OR2L13	PMFBP1
PLEKHG5				P2RY12	POU2F1
PMFBP1				PASK	PRCD
POLR2M				PAX7	PRDM2
POM121C				PCDHGB8P	PRKG1
POU6F2				PCED1B	PRR26
PRKCE				PCSK6	PRSS3
PRKG1				PDE4B	PSMD5
PRMT7				PDE4D	PTN
PROX1				PDHA1	PTPRF
PRPH2				PDPN	RAB40C
PTK2B				PELI2	RBM4
PTPRN				PEPD	RBMS3
PTPRN2				PFDN6	RGMA
RAB3GAP1				PIGC	RGS17
RANBP17				PIP5KL1	RHOQ
RBFOX3				PITX2	RIT2
RERE				PLEKHH3	RNF14
REXO1				POU4F1	RNF32
RGS12				PRCD	RPS6KC1
RGS17				PRDM8	RTCB
RHBG				PRICKLE2	RUNX1
ROR2				PRKG1	RXRB
RORA				PRLR	SEC22C
RPH3A				PSMD11	SEMA3A
RPTOR				PTPRF	SEMA4G
RREB1				PTPRK	SFMBT2
RTN4				PTPRU	SHROOM1
SEMA4D				PWP1	SLAMF8
SEMA5B				PXDC1	SLC11A2
SEMA6C				QKI	SLC1A4
SEMA6D				RAB40C	SLC22A18
SF3A2				RAB4A	SLC35A3
SH3RF1				RBMS3	SLC9B2
SHANK2				RCC2	SLMAP
SIK3				REM2	SMCHD1
SLC10A7				RHOBTB2	SNORA70
SLC22A18AS				RHOU	SNORD48
SLC24A5				RNF130	SOCS4
SLC35F4				ROR2	SOD2
SLC39A11				RPL27A	SORBS2
SLC8A1				RPL28	SORT1
SLCO3A1				RREB1	SPIRE1
SNTG2				RTN4	SPRY1
SNX29				RUNX1	SRI
SPATS2L				SCFD2	ST20
SPOCK1				SEL1L	ST6GALNAC5
SRRM2				SFMBT1	STARD13
SSH2				SFMBT2	STEAP2
STARD13				SFSWAP	STK3
STX18				SGOL2	SUPT3H
SULF2				SIX6	SVIL
SUN1				SLAMF8	SYNE2
SUPT3H				SLC11A2	SYNE4
SYCP2L				SLC16A6	TAF3
SYN2				SLC1A4	TAGLN2
SYT3				SLC35D1	TCERG1L
TBX15				SMAD9	TCF12
TCERG1L				SMOC2	TCP10L
TCF12				SNORA70	TCP10L2
TCF7L2				SORBS2	TGIF1
TCTN1				SORT1	THAP2
TFAP2D				SP5	THAP4
TGFBRAP1				SPECC1	THOP1
TMEFF2				SPIRE1	TMCO1
TMEM132B				SPP1	TMEM167B
TMEM212				SPRY1	TMPRSS3
TNRC6B				SRRM2	TOLLIP
TOX				SSR3	TP53BP1
TP73				STARD13	TPD52
TRAK1				STEAP2	TRIM58
TTBK2				STON1-GTF2A1L	TSPO2
TTC28				SUPT3H	TTBK2
TTLL11				SYNE1	TUBGCP5
TTLL7				SYNE2	TVP23C
UBASH3B				TBC1D5	TVP23C-CDRT4
UNC79				TBX5	U2AF1L4
USP53				TCEB3	UBE2E3
VGLL4				TCF12	UGT1A1
WDR66				TCP10L2	VGLL4
WNT7B				TEAD3	WDR27
WWC1				TMEM212	WDR31
ZBTB16				TMEM238	WT1
ZBTB7A				TMEM39B	WWC1
ZFHX3				TMPRSS3	WWP2
ZWILCH				TOLLIP	WWTR1-AS1
				TOX	YAP1
				TPD52	ZBTB33
				TPM4	ZDHHC14
				TRAF1	ZFAND6
				TRAPPC3	ZNF135
				TSPAN31	ZNF239
				TTLL5	ZNF512
				TTLL7	ZNF76
				TUBGCP2	ZNRD1-AS1
				TVP23C	ZRANB1
				TVP23C-CDRT4	ZWILCH
				UBE2D3
				UCKL1
				UPF3A
				USF1
				VARS
				WDR27
				XPNPEP3
				ZBTB16
				ZHX3
				ZNF512
				ZNF609
				ZNF839
				ZNRD1-AS1
AATK	ABR	ACAN	ACSL1	ABCG5	ABCC13	AGPAT9	ADRBK2	Candidates from baseline EWAS with neg. weight change after intervention (combined P<0.01)
AC007319.1	ABTB1	ACTN4	AGAP1	ADAMTS19	ABCG5	CAST	AQP9
AC016903.2	AC007319.1	ADCY9	AKAP6	AGPAT9	ADCY6	CCR1	BNC1
ACOX1	ACVR1C	AGBL4	ALK	ALG1	ADRBK2	CYHR1	C12orf39
ADAM19	ADCY3	ANKS1B	ANK1	ANK3	AKAP13	DENND2A	COL4A5
ADAMTS2	AGBL4	ARHGAP26	ANK3	ANKMY2	ANK3	ETV6	CPE
ADAMTSL1	ANK3	ARL15	ANO4	ANKRD10	ANKMY2	FAM46A	CYGB
ADCY3	ANKRD28	ATP2C1	AP3S2	ANKRD6	ANKRD6	IQGAP2	LEF1
ADCY9	ANKRD6	CAND2	ARHGEF3	ANKS3	AQP9	LAMA2	MAL
AGAP1	ANKS1B	CHN2	ARL15	ANP32E	ARHGEF38	LIMCH1	NET1
AGBL4	ARFGEF1	CHST11	ASCL2	ANXA7	ARID1B	NET1	PDE8B
AKAP6	ARID5B	COLGALT2	ATP1B2	ARHGAP6	ARMCX4	NTRK2	PDK2
AL355490.1	ARL15	CPQ	ATXN7	ARID1B	ARPP19	PTPRF	PTPRF
ALK	ASTN2	CROCC	ATXN7L1	ARID5B	ASB5	RNF130	RGMA
ANK3	ATP2B4	DNAH17	AUTS2	ARSG	ATP5A1	RUNX1	RGS17
ANKRD26	ATXN7L1	EIF3H	BCL2	ASIC2	ATP6V1G2	SLAMF8	WT1
ANKRD28	BCL2	EYA1	BICC1	ATG9A	ATP6V1G2-DDX39B	SLC1A4	WWC1
ANKRD6	BDNF	FGFR4	C2CD4B	ATXN7	ATXN8OS	SPP1
ANKS1B	BICC1	FNDC3B	CACNA2D1	B9D1	BACH1	TTLL7
AP001042.1	BMPR1B	FTO	CACNA2D3	BAP1	BARHL1	ZHX3
ARHGAP15	BNIP3L	GNA12	CAMK1D	BATF3	BCL2
ARL15	C14orf39	GRM1	CBX7	BAZ1A	BDNF
ARNTL	C17orf67	HAPLN1	CD81	BAZ2B	BFSP2
ASCC3	C19orf47	HECTD4	CHST6	BCL2	BNC1
ASIC2	CADPS	IL1RAP	CMIP	BCL7A	BYSL
AUTS2	CAND2	ITGB6	CPA6	BDNF	C12orf39
B4GALT5	CCND1	JAZF1	CPQ	BMI1	C14orf166B
BACE2	CD34	KCNQ1	DENND2C	BRINP1	C17orf67
BACH1	CDH13	LDB2	DLEU1	BTNL2	C6orf123
BCL2	CLDN20	NELL2	DUSP9	C17orf67	C8orf4
BDNF	CMIP	NUCB2	EGFLAM	C17orf96	C9orf131
BMPR1B	CNTN2	NXN	EHMT2	C21orf49	CACNA1C
CACNA1C	CNTN5	PCED1B	EML2	C21orf88	CACNB4
CADPS	COL14A1	PDLIM5	ERN1	C3orf20	CAPN3
CAMTA1	COL8A1	PEPD	ETS1	C6orf123	CCDC137
CAST	CPNE4	PRKCD	EXOC6	C8orf4	CCDC67
CASZ1	CUEDC1	PTPRK	EYA2	C9orf131	CCNDBP1
CDH13	CUX1	RPS6KA2	EYS	C9orf89	CENPJ
CERS3	CYBRD1	SCUBE1	FAM167A	CA6	CEP170
CHFR	CYP19A1	SH3PXD2A	FBRSL1	CACNA1C	CHST11
CMIP	DAB2	SLC43A2	FBXL7	CACNA2D1	CLDN20
CNTNAP2	DAND5	SMAD3	FGF14	CAPN3	CLSTN2
COMT	DIRC3	SYT3	FGFR4	CAST	COL4A5
CPNE4	DLEU1	TBX15	FTO	CCDC40	COLGALT2
CRYL1	DLG2	TBX4	GABRG3	CCDC57	COMT
CSNK1G2	DNAH17	TCF7L2	GATAD2A	CCR1	CPE
DDAH1	DOCK2	TGFB2	GLP2R	CDIP1	CPQ
DENND1A	DOCK6	TMEM18	GNG7	CDK18	CSGALNACT1
DGKI	DPP4	ZMIZ1	GRK5	CELF2	CSTF2T
DLEU1	DPYD	ZNRF3	HECTD4	CENPJ	CYGB
DLG2	DYM		HECW1	CETN3	CYLD
DLG4	EBF1		HSD17B12	CFTR	CYP1B1-AS1
DMXL2	EBF2		HTT	CHD2	CYP2B6
DNAJC11	ECE1		IGF2BP3	CLDN20	DAB2
DOCK2	EDEM2		IMP3	CLSTN2	DCUN1D1
DPF3	EPHB1		INSR	CMSS1	DFFA
DPP4	EYA1		JAZF1	CMTR1	DGKZ
DPYD	EYA2		KCNQ1	COL11A2	DOCK9
DTX2P1	FGFR4		KSR2	COL18A1	DPF3
DYSF	FNDC3B		LHPP	COLGALT2	DPY19L2P2
EBF1	FTO		LRP1B	CREBBP	DPY19L3
ECE1	GRB2		MAEA	CREM	DPYSL3
EFEMP2	HECTD4		MAGI1	CUX1	DQX1
EFNA5	HMBS		MARCH1	CYGB	DUS2
EHBP1	HMGB1		MBNL1	CYHR1	DUSP14
EHMT1	HNRNPR		MRPL19	CYP3A7	DXO
EIF3H	HOXC13		MRPS35	DCHS2	EFNA5
ELAVL4	HTT		MSH3	DCUN1D1	EHD1
ENO4	IL20RB		MYO1E	DENND2A	ELAVL4
EPHA4	INSR		NAT1	DGKZ	ELF1
EPHB1	IQGAP2		NDUFAF6	DLEU1	EML1
ERBB4	ITGA11		NFKBIL1	DMXL2	ENPP7
ERC2	ITGA7		NTRK2	DNAI1	ERBB4
ETF1	JAZF1		NTRK3	DPYD	ERG
EVI5	KCNQ1		NUS1	DPYSL3	ERN2
EYS	LAMA4		NXN	DQX1	ETF1
FAM120A	LIN52		OASL	DST	ETV4
FAM155A	LINC00511		PANX2	DUSP10	EXOC6
FHL2	LITAF		PBX4	DXO	FAM19A2
FIBCD1	LRRC1		PCGF3	DYNLL2	FAM200A
FMN2	LRRC3B		PCSK6	EFNA5	FANCF
FTO	LUZP2		PEPD	EHD1	FBXL7
FUT8	MACROD1		PINX1	EIF2AK2	FBXO16
GAB2	MAP3K3		POU2F1	ELAC1	FBXO18
GALNT16	MAPKBP1		PPARA	EML4	FGFR4
GNAQ	MAST4		PPP2R2C	ERBB4	FHL2
GRIA1	MEGF8		PRKAG2	ERG	FRMPD1
GRID1	MEIS1		PROX1	ERN2	G3BP1
GSK3B	MEIS2		PRPF31	ETF1	GABBR1
GTF2A1L	MLLT10		PSMC2	ETV6	GATA2
HECTD4	MSRB3		PTPRN2	FAM118A	GATA3
HIP1	MYH11		RASA1	FAM120B	GCNT2
HIVEP2	MYL4		RBL2	FAM171A2	GGPS1
HIVEP3	MYO3B		RBM19	FAM217A	GLIS1
HMGB1	NCAM1		RHOU	FAM46A	GLP2R
HSD17B12	NRIP3		ROR2	FARS2	GNE
IGHMBP2	NUCB2		RREB1	FBXO16	GPR133
INPP4B	OLFM2		SCTR	FBXO18	HAAO
ITPK1	OPCML		SEC11C	FOXC2	HAL
JAKMIP2	PBX1		SH2B2	FOXM1	HAPLN1
JAKMIP3	PDCD6IP		SLC16A13	FUBP1	HBE1
JAZF1	PEPD		SLC1A2	G3BP1	HCG14
KCND3	PHTF2		SLC22A18AS	GABPB1	HCN1
KCNMA1	PIGC		SLC9B2	GADD45A	HECW1
KCNQ1	PINX1		SPTB	GALNS	HGF
KIRREL3	PKD1		STARD7	GCM1	HIF1AN
KLF7	PLCE1		STARD9	GCNT2	HLA-DPB2
KSR2	PLXND1		TCERG1L	GLIS1	HLA-F-AS1
LDB2	PRDM16		TCF12	GPBP1	HMGN1
LINC00458	PRMT6		TCF7L2	GPN1	HMGN5
LINC00461	PROX1		THADA	GPR98	HOXC6
LINGO1	RBL2		TMEM18	GRID1	HSP90AA1
LMO1	RERE		TNFAIP6	GTDC1	HSP90AB1
LRP1B	RFX4		TTLL6	H2AFY	IL12A
LRRC7	RNA5SP224		UHRF1	HAAO	INTS6
MACROD1	RORA		USP3	HCN1	ITGA11
MAP2K1	RRAS2		USP48	HDAC4	JARID2
MAP3K12	RREB1		WT1	HGF	KATNAL2
MAP3K3	RUNX1		XYLT1	HIPK1	KBTBD3
MAPKBP1	SCGB3A1		Y_RNA	HIST1H1E	KCNA2
MARCH6	SIK3		ZFAND3	HLA-DPB2	KCTD1
MAST4	SLC38A9		ZHX3	HLA-F-AS1	KDR
MCTP1	SLCO3A1		ZIC1	HLA-J	KIAA0513
MEGF11	SMAD3		ZMIZ1	IGHMBP2	KIAA0825
MFAP3	SSR3			IGSF10	KIAA1324
MLLT10	STAB1			INTS6	KIF20A
MSI2	STOML3			INTS6-AS1	KLHL1
MTOR	STON1-GTF2A1L			IQGAP2	LEF1
MYO10	TBX15			ITGA11	LIFR
MYO1E	TBX4			JAKMIP2	LIN52
MYO3B	TCEA3			KATNAL2	LINC00670
NAALADL2	TCF7L2			KCNA2	LRP1B
NADK	TEX9			KIAA0895	LRRC4C
NBL1	THADA			KIAA1324	LURAP1L
NCAM1	TIMP2			KIRREL3	LUZP2
NOTCH4	TMEM18			KIRREL3-AS3	MAD1L1
NPAS3	TNRC6B			KLHL1	MAL
NREP	TP73			KMT2D	MAPKAPK2
NTM	TRIM8			KY	MARCH10
NTRK2	TSPAN9			LAMA2	MARK2
NUDT3	TTC28			LAMA4	MBNL1
NUP160	UGGT2			LDB2	MCF2L
OARD1	USP3			LIMCH1	MECP2
OPCML	WT1			LINC00478	MFAP1
OSBPL10	Y_RNA			LINC00670	MIR5188
PAFAH1B2	ZHX3			LRRC1	MLLT4-AS1
PARD3B	ZMIZ1			LRRC6	MRPL21
PAX5	ZNF268			MAEA	MRPL42
PAX6	ZNRF3			MAPKAPK2	MSRB3
PAX7				MARCH10	MST1
PDE10A				MBNL1	MSX1
PDE1C				MCTP1	MT1A
PDE4B				MGAT1	MTUS1
PDZD2				MGAT4C	NAT1
PEPD				MGST1	NDUFAF6
PHACTR1				MIPOL1	NET1
PLCG1				MIR484	NEUROD1
PLCL1				MMP20	NME2
PLEKHG5				MRPL21	NR2F2
PMFBP1				MST1L	NREP
POLR2M				MSX1	OR1A2
POM121C				MT3	OR2H2
POU6F2				MTHFD1	OXLD1
PRKCE				MYH3	OXR1
PRKG1				MYO1B	PACRG
PRMT7				NAT1	PCDHGB8P
PROX1				NCAM1	PCED1B
PRPH2				NCK2	PCSK1
PTK2B				NDE1	PDCD4
PTPRN				NDUFC1	PDE4D
PTPRN2				NEB	PDE8B
RAB3GAP1				NEDD4	PDK2
RANBP17				NET1	PDP2
RBFOX3				NHLH2	PDZD2
RERE				NOL8	PIGC
REXO1				NR2F2	PITPNB
RGS12				NRP2	PITX2
RGS17				NTRK2	PLCG1
RHBG				OFD1	PMFBP1
ROR2				OR2H2	POU2F1
RORA				P2RY12	PRCD
RPH3A				PASK	PRDM2
RPTOR				PAX7	PRKG1
RREB1				PCDHGB8P	PRR26
RTN4				PCED1B	PRSS3
SEMA4D				PCSK6	PTN
SEMA5B				PDE4B	PTPRF
SEMA6C				PDE4D	RAB40C
SEMA6D				PDHA1	RBM4
SF3A2				PDPN	RBMS3
SH3RF1				PELI2	RGMA
SHANK2				PEPD	RGS17
SIK3				PFDN6	RHOQ
SLC10A7				PIGC	RIT2
SLC22A18AS				PIP5KL1	RNF32
SLC24A5				PITX2	RTCB
SLC35F4				PLEKHH3	RUNX1
SLC39A11				POU4F1	RXRB
SLC8A1				PRCD	SEC22C
SLCO3A1				PRICKLE2	SEMA4G
SNTG2				PRKG1	SFMBT2
SNX29				PRLR	SHROOM1
SPATS2L				PSMD11	SLAMF8
SPOCK1				PTPRF	SLC11A2
SRRM2				PTPRK	SLC1A4
SSH2				PTPRU	SLC22A18
STARD13				PWP1	SLC35A3
STX18				PXDC1	SLC9B2
SULF2				QKI	SLMAP
SUPT3H				RAB40C	SMCHD1
SYCP2L				RAB4A	SNORA70
SYN2				RBMS3	SNORD48
SYT3				RCC2	SOCS4
TBX15				RHOBTB2	SOD2
TCERG1L				RHOU	SORT1
TCF12				RNF130	SPIRE1
TCF7L2				ROR2	SPRY1
TCTN1				RPL27A	SRI
TFAP2D				RPL28	ST20
TGFBRAP1				RREB1	ST6GALNAC5
TMEFF2				RTN4	STARD13
TMEM132B				RUNX1	STEAP2
TMEM212				SCFD2	STK3
TNRC6B				SEL1L	SUPT3H
TOX				SFMBT1	SVIL
TP73				SFMBT2	SYNE2
TRAK1				SFSWAP	SYNE4
TTBK2				SGOL2	TAF3
TTC28				SIX6	TAGLN2
TTLL11				SLAMF8	TCERG1L
TTLL7				SLC11A2	TCF12
UBASH3B				SLC16A6	TCP10L
UNC79				SLC1A4	TCP10L2
USP53				SLC35D1	TGIF1
VGLL4				SMAD9	THAP2
WNT7B				SMOC2	THAP4
WWC1				SNORA70	THOP1
ZBTB16				SORT1	TMCO1
ZBTB7A				SP5	TMEM167B
ZFHX3				SPECC1	TMPRSS3
ZWILCH				SPIRE1	TOLLIP
				SPP1	TP53BP1
				SPRY1	TPD52
				SRRM2	TSPO2
				SSR3	TTBK2
				STARD13	TVP23C
				STEAP2	TVP23C-CDRT4
				STON1-GTF2A1L	U2AF1L4
				SUPT3H	UGT1A1
				SYNE1	VGLL4
				SYNE2	WDR27
				TBC1D5	WDR31
				TBX5	WT1
				TCEB3	WWC1
				TCF12	WWTR1-AS1
				TCP10L2	YAP1
				TEAD3	ZBTB33
				TMEM212	ZDHHC14
				TMEM238	ZFAND6
				TMEM39B	ZNF135
				TMPRSS3	ZNF239
				TOLLIP	ZNF512
				TOX	ZNF76
				TPD52	ZNRD1-AS1
				TPM4	ZRANB1
				TRAF1	ZWILCH
				TRAPPC3
				TSPAN31
				TTLL5
				TTLL7
				TUBGCP2
				TVP23C
				TVP23C-CDRT4
				UBE2D3
				UPF3A
				USF1
				VARS
				WDR27
				XPNPEP3
				ZBTB16
				ZHX3
				ZNF512
				ZNF609
				ZNF839
				ZNRD1-AS1
Table S4: The table provides genes being differentially methylated between responders and non-responders (2D-KS P<0.01) (CENTRAL trial) and which showed a neg. correlation of DNA methylation at baseline with relative changes (combined P<0.01; area marked in dark grey) in body weight after intervention; which were a) previously reported in GWAS for BMI, waist-to-hip ratio (WHR), waist circumferenc…

## Sheet: Table S5
Table S5: Gene ontology enrichment analysis Table
Comparisons	GO TERM		Description	N	FDR
Candidates from baseline EWAS with neg. weight change after intervention (P<0.05)	GO:0009653	BP	anatomical structure morphogenesis	2726	0.00023181
	GO:0007155	BP	cell adhesion	1411	0.000675181
	GO:0022610	BP	biological adhesion	1418	0.00075782
	GO:0000902	BP	cell morphogenesis	1032	0.0147628
	GO:0023051	BP	regulation of signaling	3655	0.0147628
	GO:0010646	BP	regulation of cell communication	3613	0.0194731
	GO:0009887	BP	animal organ morphogenesis	1065	0.0268113
	GO:0007399	BP	nervous system development	2366	0.0478266
	GO:0006928	BP	movement of cell or subcellular component	2145	0.0499881
	GO:0030155	BP	regulation of cell adhesion	689	0.0499881
	GO:0045595	BP	regulation of cell differentiation	1860	0.0499881
	GO:0048729	BP	tissue morphogenesis	669	0.0499881
	GO:0048856	BP	anatomical structure development	5949	0.0499881
	GO:0050793	BP	regulation of developmental process	2676	0.0499881
	GO:0070161	CC	anchoring junction	766	0.000675137
	GO:0030054	CC	cell junction	1858	0.000675181
	GO:0005911	CC	cell-cell junction	415	0.0499881
Responder vs non Responder DMR genes (2D-KS p-value <0.05)	GO:0007156	BP	homophilic cell adhesion via plasma membrane adhesion molecules	168	8.31216e-14
	GO:0098742	BP	cell-cell adhesion via plasma-membrane adhesion molecules	273	3.38894e-13
	GO:0098609	BP	cell-cell adhesion	835	1.21358e-05
	GO:0022610	BP	biological adhesion	1418	0.00206676
	GO:0007155	BP	cell adhesion	1411	0.00436651
	GO:0016339	BP	calcium-dependent cell-cell adhesion via plasma membrane cell adhesion molecules	48	0.0219911
	GO:0005509	MF	calcium ion binding	698	8.06801e-05
	KEGG Pathway		Description	N	FDR
Responder vs non Responder DMR genes (2D-KS p-value <0.05)	path:hsa05204		Chemical carcinogenesis	82	0.0404354
Table S5: GO term and KEGG enrichment for all probes with negative correlation to weight loss (P<0.05) and probes from responder vs. non-responder DMRs (2D-KS P<0.05). Enrichment was analyzed taking into account the distribution of probes on the EPIC array. GO Term is the GO or KEGG identifier, description is a further description of the GO or KEGG term. GO ontology specifies to which GO ontology…

## Sheet: Table S6
Table S6: Full list of intervention specific CpGs
location	ProbeID	intercept	f	DMPfinder_p-value	DMPfinder_q-value	SNPprobes	cross-reactiveprobes	genes	probes/gene	comparison
chr1:567312-567313	cg05001044	0.284011	50.0203	1.6843e-11	1.44885e-05	0	1	hsa-mir-6723,RP5-857K21.7,RP5-857K21.4	14,11,25	T0_vsT18
chr1:564504-564505	cg22519184	0.380797	44.0934	2.10294e-10	7.66505e-05	0	0	RP5-857K21.5,MTND1P23,MTND2P28,RP5-857K21.4	6,3,6,25	T0_vsT18
chr1:203317913-203317914	cg12488895	0.789171	42.8721	3.56427e-10	7.66505e-05	0	0	FMOD	24	T0_vsT18
chr10:43932620-43932621	cg09608028	0.537507	43.108	3.21832e-10	7.66505e-05	0	1	ZNF487	24	T0_vsT18
chr2:130939362-130939363	cg20150163	0.0502963	38.1461	2.81528e-09	0.000403621	0	0	SMPD4,MZT2B	35,24	T0_vsT18
chr9:131266982-131266983	cg22545525	0.0597431	38.3095	2.61939e-09	0.000403621	0	0	GLE1	16	T0_vsT18
chr22:50945860-50945861	cg11108982	0.0954139	36.9624	4.75472e-09	0.000584295	0	0	LMF2,NCAPH2	21,26	T0_vsT18
chr5:79947052-79947053	cg04272309	0.439956	36.2854	6.42423e-09	0.000690774	0	1	MTRNR2L2,DHFR	7,30	T0_vsT18
chr2:61404587-61404588	cg17926234	0.115588	35.132	1.07487e-08	0.000770512	0	0	AHSA2	25	T0_vsT18
chr7:75472763-75472764	cg22824450	0.592768	35.1535	1.06458e-08	0.000770512	0	1	RHBDD2	33	T0_vsT18
chr11:67205869-67205870	cg16408081	0.631642	35.6928	8.366e-09	0.000770512	0	0	PTPRCAP,CORO1B	19,41	T0_vsT18
chr19:18529985-18529986	cg09126419	0.0795192	35.1989	1.04316e-08	0.000770512	0	0	SSBP4	25	T0_vsT18
chr1:1285214-1285215	cg05115545	0.047323	34.392	1.49746e-08	0.000945822	0	0	DVL1	28	T0_vsT18
chr5:176561096-176561097	cg00166635	0.0537589	34.3306	1.53933e-08	0.000945822	0	0	NSD1	44	T0_vsT18
chr16:2265388-2265389	cg09096612	0.0435011	34.1097	1.69993e-08	0.000974866	0	0	PGP	20	T0_vsT18
chr19:49375508-49375509	cg16264781	0.0794854	33.7565	1.99258e-08	0.00107127	0	0	PPP1R15A	13	T0_vsT18
chr1:53732274-53732275	cg03619182	0.832511	32.8484	3.00105e-08	0.00151855	0	0	RP4-784A16.1,LRP8	3,71	T0_vsT18
chr1:569687-569688	cg01070250	0.275564	32.4903	3.52882e-08	0.00159765	0	1	MTATP6P1,RP5-857K21.11,RP5-857K21.4	6,5,25	T0_vsT18
chr9:139440791-139440792	cg04271687	0.0518205	32.5827	3.3842e-08	0.00159765	0	0	MIR4674,NOTCH1,RP11-611D20.2	5,89,14	T0_vsT18
chr3:25728371-25728372	cg27572068	0.504328	32	4.40665e-08	0.0016481	0	0	CRIP1P2	3	T0_vsT18
chr7:56019566-56019567	cg07870486	0.0797096	32.0326	4.342e-08	0.0016481	0	0	MRPS17,GBAS,MRPS17	14,38,14	T0_vsT18
chr19:18529969-18529970	cg00281080	0.0722973	32.0326	4.34211e-08	0.0016481	0	0	SSBP4	25	T0_vsT18
chr20:30795610-30795611	cg25987077	0.0648463	32.1	4.21128e-08	0.0016481	0	0	PLAGL2,POFUT1	23,28	T0_vsT18
chr6:166419593-166419594	cg08330404	0.249066	31.6801	5.09554e-08	0.00182635	0	0	.		T0_vsT18
chr7:84569394-84569395	cg13253945	0.442675	31.2963	6.06722e-08	0.00203855	0	1	AC074183.4	7	T0_vsT18
chr9:140008980-140008981	cg13575271	0.10417	31.2624	6.16155e-08	0.00203855	0	0	DPP7	15	T0_vsT18
chr1:565170-565171	cg24159721	0.237462	30.8719	7.3612e-08	0.00212732	0	1	RP5-857K21.5,MTND2P28,hsa-mir-6723,RP5-857K21.4	6,6,14,25	T0_vsT18
chr3:152879841-152879842	cg01742680	0.101868	31.083	6.68601e-08	0.00212732	0	0	RP11-529G21.2,RAP2B	17,17	T0_vsT18
chr19:42463694-42463695	cg05886952	0.0912335	30.8548	7.41907e-08	0.00212732	0	0	RABAC1	14	T0_vsT18
chr22:37640250-37640251	cg18265887	0.0505755	30.882	7.3274e-08	0.00212732	0	0	RAC2	20	T0_vsT18
chr1:65613405-65613406	cg21570528	0.0634241	30.7308	7.85087e-08	0.00217852	0	0	AK4	50	T0_vsT18
chr17:36862199-36862200	cg01485645	0.256502	30.5785	8.41594e-08	0.00226234	0	0	CTB-58E17.3,MLLT6	17,34	T0_vsT18
chr14:105647510-105647511	cg02007493	0.0656453	30.1797	1.00985e-07	0.00263238	0	0	RP11-44N21.4,NUDT14	45,21	T0_vsT18
chr9:131644556-131644557	cg16898150	0.0560921	29.9778	1.10762e-07	0.002701	0	0	LRRC8A,CCBL1	42,31	T0_vsT18
chr19:18717779-18717780	cg04039417	0.1374	30.0459	1.07366e-07	0.002701	0	0	CRLF1,TMEM59L	60,34	T0_vsT18
chr19:56111852-56111853	cg08250364	0.0655854	29.9334	1.13037e-07	0.002701	0	0	FIZ1,ZNF524	28,15	T0_vsT18
chr3:42544020-42544021	cg04322483	0.0855569	29.5165	1.36849e-07	0.00282846	0	0	VIPR1	60	T0_vsT18
chr7:73097886-73097887	cg12099727	0.0593299	29.6849	1.26677e-07	0.00282846	0	0	DNAJC30,WBSCR22	21,40	T0_vsT18
chr7:75974205-75974206	cg08278784	0.81328	29.6572	1.28295e-07	0.00282846	0	0	YWHAG	39	T0_vsT18
chr11:114130575-114130576	cg17344999	0.759782	29.4931	1.38325e-07	0.00282846	0	0	RP11-64D24.2,NNMT	74,37	T0_vsT18
chr14:51555158-51555159	cg11727826	0.764499	29.5285	1.36097e-07	0.00282846	0	0	RP11-1140I5.1,TRIM9	3,51	T0_vsT18
chr16:89574615-89574616	cg05671791	0.0732785	29.4454	1.41388e-07	0.00282846	0	0	SPG7	136	T0_vsT18
chr22:46692687-46692688	cg22396353	0.0508493	29.5941	1.32064e-07	0.00282846	0	0	GTSE1	27	T0_vsT18
chr6:33539085-33539086	cg04678565	0.039542	29.2889	1.51925e-07	0.00297017	0	0	.		T0_vsT18
chr17:72856064-72856065	cg17354190	0.0365239	29.2081	1.57671e-07	0.00301401	0	0	GRIN2C	32	T0_vsT18
chr2:131415051-131415052	cg08085668	0.738028	29.0969	1.65944e-07	0.00302352	1	1	POTEJ	4	T0_vsT18
chr4:76598477-76598478	cg01331554	0.0365994	29.0196	1.71948e-07	0.00302352	0	0	G3BP2	60	T0_vsT18
chr4:129002662-129002663	cg24383069	0.486245	29.0878	1.66638e-07	0.00302352	0	1	LARP1B	34	T0_vsT18
chr19:1941705-1941706	cg12364882	0.123047	29.016	1.72228e-07	0.00302352	0	0	CSNK1G2	71	T0_vsT18
chr1:150898663-150898664	cg02060408	0.125345	28.7545	1.94259e-07	0.00321352	0	0	SETDB1	21	T0_vsT18
chr2:26468218-26468219	cg20517616	0.18152	28.7964	1.90551e-07	0.00321352	0	0	HADHA,HADHB	28,34	T0_vsT18
chr7:73669010-73669011	cg26052553	0.0410167	28.761	1.93684e-07	0.00321352	0	0	RFC2	27	T0_vsT18
chr1:1850925-1850926	cg14180718	0.137649	28.5898	2.09577e-07	0.00340152	0	0	TMEM52	25	T0_vsT18
chr10:6019609-6019610	cg08676905	0.107031	28.548	2.13657e-07	0.00340352	0	0	IL15RA	34	T0_vsT18
chr1:16162653-16162654	cg18219212	0.0547084	28.4112	2.27568e-07	0.00351022	0	0	RP11-169K16.9	35	T0_vsT18
chr8:28243953-28243954	cg19139277	0.088689	28.4022	2.28517e-07	0.00351022	0	0	ZNF395,FBXO16	58112	T0_vsT18
chr19:47690096-47690097	cg07338787	0.606756	28.0607	2.67538e-07	0.00403753	0	0	SAE1	43	T0_vsT18
chr6:32158153-32158154	cg09028157	0.105709	27.8255	2.98276e-07	0.00442379	0	0	PBX2	46	T0_vsT18
chr19:16607011-16607012	cg01077808	0.0643474	27.6812	3.18879e-07	0.0046492	0	0	CALR3,C19orf44,CTD-3222D19.2	19,24,128	T0_vsT18
chr1:62207888-62207889	cg12128740	0.158261	27.3666	3.68918e-07	0.00476035	0	0	RP11-430G17.3,INADL	8,76	T0_vsT18
chr4:71705074-71705075	cg21928726	0.0600608	27.4531	3.54417e-07	0.00476035	0	0	GRSF1	25	T0_vsT18
chr6:139301401-139301402	cg24861229	0.827781	27.4165	3.60485e-07	0.00476035	0	0	REPS1	42	T0_vsT18
chr7:1220036-1220037	cg12190521	0.847128	27.563	3.36829e-07	0.00476035	0	0	.		T0_vsT18
chr9:131486578-131486579	cg19725675	0.0539614	27.4374	3.57004e-07	0.00476035	0	0	ZDHHC12,RP11-545E17.3	15,15	T0_vsT18
chr11:118888917-118888918	cg27124567	0.160133	27.3643	3.69309e-07	0.00476035	0	0	RPS25,TRAPPC4,MIR3656	21,26,17	T0_vsT18
chr19:36631058-36631059	cg20731533	0.0568278	27.3558	3.70774e-07	0.00476035	0	0	CAPNS1	18	T0_vsT18
chr22:20008614-20008615	cg18587988	0.0444553	27.3937	3.64316e-07	0.00476035	0	0	TANGO2	56	T0_vsT18
chr19:8570921-8570922	cg24327541	0.0616684	27.2714	3.85571e-07	0.00487753	0	0	.		T0_vsT18
chr8:72580304-72580305	ch.8.72742858R	0.151279	27.0486	4.27581e-07	0.00518042	0	0	.		T0_vsT18
chr12:94533932-94533933	cg06781468	0.783505	27.0724	4.22895e-07	0.00518042	1	1	RP11-74K11.1	7	T0_vsT18
chr19:48972844-48972845	cg02239082	0.0465498	27.1023	4.17051e-07	0.00518042	0	0	CTC-273B12.5,CTC-273B12.7,CYTH2	19,23,27	T0_vsT18
chr3:49449507-49449508	cg16951854	0.0881419	26.9597	4.45618e-07	0.00527894	0	0	TCTA,RHOA	24,40	T0_vsT18
chr4:1004110-1004111	cg02930242	0.0458205	26.9483	4.47987e-07	0.00527894	0	0	FGFRL1	65	T0_vsT18
chr12:112451002-112451003	cg08908102	0.0494027	26.8717	4.64219e-07	0.00532434	0	0	TMEM116,ERP29	31,23	T0_vsT18
chr16:1414013-1414014	cg01679473	0.766875	26.8743	4.63658e-07	0.00532434	0	0	UNKL	106	T0_vsT18
chr5:79947048-79947049	cg27559706	0.366821	26.8233	4.74788e-07	0.00533174	0	1	MTRNR2L2,DHFR	7,30	T0_vsT18
chr9:2158313-2158314	cg01244981	0.072243	26.7883	4.8257e-07	0.00533174	0	0	SMARCA2	82	T0_vsT18
chr10:46167841-46167842	cg12333578	0.0457773	26.7843	4.83459e-07	0.00533174	0	0	ZFAND4	34	T0_vsT18
chr9:86432854-86432855	cg25329269	0.141967	26.6386	5.17375e-07	0.00563356	0	1	GKAP1	17	T0_vsT18
chr6:31926279-31926280	cg11565585	0.0916286	26.5649	5.3543e-07	0.0056862	0	0	NELFE,SKIV2L	51,81	T0_vsT18
chr20:3827347-3827348	cg02180766	0.0528339	26.5745	5.33034e-07	0.0056862	0	0	MAVS	22	T0_vsT18
chr1:564925-564926	cg11894324	0.280492	26.5192	5.46934e-07	0.00573754	0	1	RP5-857K21.5,MTND2P28,RP5-857K21.4	6,6,25	T0_vsT18
chr16:30569726-30569727	cg16594066	0.0729192	26.4439	5.6647e-07	0.00580099	0	0	ZNF764,AC002310.13	19,42	T0_vsT18
chr16:67916349-67916350	cg18926042	0.743202	26.4521	5.64311e-07	0.00580099	0	0	CTC-479C5.10,EDC4	22,38	T0_vsT18
chr3:53106869-53106870	cg25751261	0.0739752	26.3119	6.02399e-07	0.00595249	0	0	RP11-894J14.5	51	T0_vsT18
chr20:61436007-61436008	cg26635824	0.0985615	26.3313	5.96963e-07	0.00595249	0	0	OGFR-AS1,OGFR	20,29	T0_vsT18
chr22:19705545-19705546	cg01607455	0.0519679	26.2887	6.08943e-07	0.00595249	0	0	2005-09-01	48	T0_vsT18
chr22:38902511-38902512	cg08522428	0.102197	26.3364	5.95546e-07	0.00595249	0	0	DDX17	35	T0_vsT18
chr19:10678015-10678016	cg06865036	0.752438	26.2089	6.32019e-07	0.00610864	0	0	CDKN2D,KRI1	16,29	T0_vsT18
chr7:6098788-6098789	cg21894058	0.0646551	26.1519	6.49072e-07	0.00620376	0	0	EIF2AK1	34	T0_vsT18
chr2:96932018-96932019	cg27381194	0.0446813	25.9997	6.96823e-07	0.00646207	0	0	CIAO1,TMEM127	19,23	T0_vsT18
chr4:148605397-148605398	cg05164514	0.0364169	26.0375	6.84644e-07	0.00646207	0	0	PRMT10	20	T0_vsT18
chr11:11138882-11138883	cg10765777	0.775921	25.9942	6.98635e-07	0.00646207	0	0	RP11-179A10.1	16	T0_vsT18
chr1:3566763-3566764	cg06839380	0.115609	25.9352	7.18125e-07	0.00652782	0	0	WRAP73	103	T0_vsT18
chr19:3985498-3985499	cg02612712	0.0328095	25.9269	7.20921e-07	0.00652782	0	0	EEF2	37	T0_vsT18
chr10:5931431-5931432	cg03654466	0.0371936	25.8114	7.60898e-07	0.00675719	0	0	ANKRD16,FBXO18	28,56	T0_vsT18
chr21:43429161-43429162	cg04581753	0.112224	25.8084	7.61962e-07	0.00675719	0	0	ZBTB21,ZNF295-AS1	21,31	T0_vsT18
chr3:136471376-136471377	cg24973791	0.0488022	25.7307	7.90134e-07	0.00689915	0	0	RP11-102M11.2,STAG1	12,68	T0_vsT18
chr5:32585739-32585740	cg15288179	0.0331743	25.7006	8.01326e-07	0.00689915	0	0	SUB1	38	T0_vsT18
chr13:82264192-82264193	cg13081381	0.583563	25.6988	8.02031e-07	0.00689915	0	1	PTMAP5	3	T0_vsT18
chr2:29117416-29117417	cg07749079	0.0860761	25.5263	8.69401e-07	0.00691908	0	0	WDR43	31	T0_vsT18
chr4:152020616-152020617	cg16164079	0.038401	25.5959	8.41548e-07	0.00691908	0	0	RPS3A	20	T0_vsT18
chr6:43021882-43021883	cg13915858	0.0809353	25.5909	8.43512e-07	0.00691908	0	0	CUL7,KLC4,MRPL2	30,60,28	T0_vsT18
chr7:559675-559676	cg14017435	0.0453731	25.6322	8.27388e-07	0.00691908	0	0	AC147651.3,PDGFA	26,56	T0_vsT18
chr7:5570493-5570494	cg21189070	0.199726	25.5084	8.76739e-07	0.00691908	0	0	ACTB	47	T0_vsT18
chr11:65729012-65729013	cg13426544	0.039216	25.5527	8.58737e-07	0.00691908	0	0	SART1	33	T0_vsT18
chr15:41625136-41625137	cg25861327	0.0600141	25.5618	8.55111e-07	0.00691908	0	0	OIP5,NUSAP1	21,35	T0_vsT18
chr16:18573498-18573499	cg10483393	0.0619034	25.6212	8.31664e-07	0.00691908	0	1	NOMO2	10	T0_vsT18
chr22:20004369-20004370	cg20563534	0.0896551	25.5146	8.74202e-07	0.00691908	0	0	ARVCF,TANGO2	51,56	T0_vsT18
chr1:156084516-156084517	cg04317543	0.086013	25.4275	9.10558e-07	0.00691961	0	0	LMNA	82	T0_vsT18
chr12:72667326-72667327	cg09972192	0.31618	25.4471	9.02228e-07	0.00691961	0	0	TRHDE-AS1,TRHDE	22,57	T0_vsT18
chr16:284641-284642	cg21850139	0.034716	25.4247	9.11746e-07	0.00691961	0	0	ITFG3	28	T0_vsT18
chr16:21610849-21610850	cg19859891	0.0557463	25.4397	9.05382e-07	0.00691961	0	0	METTL9	61	T0_vsT18
chr19:8273917-8273918	cg22676763	0.191917	25.4124	9.17027e-07	0.00691961	0	0	CERS4	41	T0_vsT18
chr3:40566533-40566534	cg15233126	0.0391463	25.3841	9.29277e-07	0.00695107	0	0	ZNF621	16	T0_vsT18
chr8:145691582-145691583	cg00735315	0.0677982	25.3189	9.5809e-07	0.00710481	0	0	KIFC2,CYHR1	30,45	T0_vsT18
chr11:77446060-77446061	cg13276501	0.54379	25.253	9.88101e-07	0.00726474	0	1	FTH1P16,RSF1	4,66	T0_vsT18
chr12:54423566-54423567	cg03255182	0.481576	25.1999	1.01303e-06	0.00734275	0	1	HOXC4,RP11-834C11.14,RP11-834C11.12,HOXC6	26,83,210,161	T0_vsT18
chr17:34901364-34901365	cg00688900	0.140613	25.1941	1.01578e-06	0.00734275	0	0	GGNBP2	21	T0_vsT18
chr1:860022-860023	cg25215298	0.0576026	25.147	1.03845e-06	0.00744407	0	0	SAMD11	57	T0_vsT18
chr20:48552844-48552845	cg04747993	0.0973306	25.1127	1.05531e-06	0.00750241	0	0	RNF114	20	T0_vsT18
chr12:1100388-1100389	cg08285180	0.0539847	25.0766	1.0733e-06	0.00756776	0	0	RP11-359B12.2,ERC1,RAD52	21,117,57	T0_vsT18
chr19:29704028-29704029	cg00815440	0.029841	24.9781	1.1241e-06	0.00786146	0	0	UQCRFS1,CTB-32O4.2	17,13	T0_vsT18
chr3:52188623-52188624	cg08760116	0.0559928	24.9492	1.13945e-06	0.00790453	0	0	POC1A	44	T0_vsT18
chr3:101292891-101292892	cg12459316	0.0649037	24.9214	1.15442e-06	0.00794435	0	0	PCNP	15	T0_vsT18
chr6:30688828-30688829	cg09389160	0.034866	24.87	1.18261e-06	0.00807374	0	0	TUBB	84	T0_vsT18
chr9:95857948-95857949	cg26885274	0.150173	24.8424	1.19801e-06	0.0081145	0	0	RP11-274J16.5,C9orf89	17,24	T0_vsT18
chr17:36831425-36831426	cg23911396	0.0627165	24.8127	1.21487e-06	0.00816438	0	0	C17orf96	18	T0_vsT18
chr22:31885573-31885574	cg12089246	0.0625608	24.769	1.24006e-06	0.00826909	0	0	DRG1,EIF4ENIF1,SFI1	81,61,72	T0_vsT18
chr3:49130904-49130905	cg26147372	0.0514405	24.718	1.27013e-06	0.00840444	0	0	QRICH1	43	T0_vsT18
chr7:44887838-44887839	cg18846423	0.0556433	24.6829	1.29122e-06	0.00847881	0	0	AC004854.4,H2AFV	13,19	T0_vsT18
chr11:207425-207426	cg25796445	0.0400339	24.6639	1.30284e-06	0.00849025	0	0	BET1L,RIC8A	51,36	T0_vsT18
chr17:40985011-40985012	cg19791605	0.10426	24.6205	1.32967e-06	0.00859998	0	0	BECN1,PSME3	38,41	T0_vsT18
chr3:52444625-52444626	cg17270005	0.0281864	24.5141	1.39787e-06	0.00895874	0	0	BAP1,PHF7	31,33	T0_vsT18
chr14:77495018-77495019	cg03366677	0.0359942	24.5019	1.40597e-06	0.00895874	0	0	IRF2BPL	20	T0_vsT18
chr12:12849096-12849097	cg06928346	0.519621	24.4528	1.43879e-06	0.00910048	0	0	GPR19	30	T0_vsT18
chr1:27216927-27216928	cg11335495	0.0929633	24.4264	1.45677e-06	0.00914693	0	0	GPN2	24	T0_vsT18
chr1:179851535-179851536	cg03115649	0.0600766	24.3196	1.53193e-06	0.00954912	0	0	RP11-533E19.7,TOR1AIP1	17,22	T0_vsT18
chr4:54232368-54232369	cg25061071	0.061041	24.2945	1.55009e-06	0.0095928	0	0	SCFD2	84	T0_vsT18
chr14:73925183-73925184	cg18806438	0.129752	24.2513	1.58196e-06	0.0096671	0	0	NUMB	70	T0_vsT18
chr19:49063796-49063797	cg08363693	0.868017	24.2478	1.58457e-06	0.0096671	0	0	SULT2B1	37	T0_vsT18
chr1:161129255-161129256	cg16370716	0.0728258	24.2167	1.60796e-06	0.00967262	0	0	RP11-297K8.2,USP21	30,27	T0_vsT18
chr3:49027828-49027829	cg13965724	0.0333573	24.219	1.60624e-06	0.00967262	0	0	RP13-131K19.2,P4HTM	27,44	T0_vsT18
chr1:155904084-155904085	cg05321960	0.129544	24.139	1.66791e-06	0.00996357	0	0	KIAA0907	33	T0_vsT18
chr3:10052900-10052901	cg27297753	0.11066	24.0398	1.74778e-06	0.0101104	0	0	AC022007.5,EMC3	17,44	T0_vsT18
chr11:560868-560869	cg05192269	0.0793488	24.0356	1.75126e-06	0.0101104	0	0	RASSF7,C11orf35	24,34	T0_vsT18
chr14:104095622-104095623	cg18762076	0.0360829	24.0436	1.74465e-06	0.0101104	0	0	KLC1,RP11-73M18.2	114,87	T0_vsT18
chr14:105780695-105780696	cg27097962	0.0684143	24.0701	1.72301e-06	0.0101104	0	0	BRF1,PACS2	165174	T0_vsT18
chr19:49971665-49971666	cg22334548	0.857622	24.075	1.71906e-06	0.0101104	0	0	ALDH16A1,CTD-3148I10.9	31,31	T0_vsT18
chr2:101033546-101033547	cg14372394	0.074825	24.0115	1.77126e-06	0.0101577	0	0	CHST10	31	T0_vsT18
chr6:30181173-30181174	cg12103149	0.0448895	23.9873	1.79162e-06	0.0102064	0	0	TRIM26	195	T0_vsT18
chr19:18632949-18632950	cg22297177	0.0665991	23.9491	1.82418e-06	0.0103236	0	0	ELL	68	T0_vsT18
chr1:150940716-150940717	cg03941336	0.799086	23.5521	2.20038e-06	0.0106937	0	0	CERS2	38	T0_vsT18
chr3:49967065-49967066	cg20162159	0.0572078	23.6728	2.07836e-06	0.0106937	0	0	MON1A	27	T0_vsT18
chr4:108852651-108852652	cg23301257	0.0664819	23.8321	1.92781e-06	0.0106937	0	0	CYP2U1,RP11-286E11.1	25,43	T0_vsT18
chr5:99389821-99389822	cg02658908	0.803883	23.6078	2.14323e-06	0.0106937	1	1	RP11-475J5.4,RP11-475J5.5	5,3	T0_vsT18
chr7:2685064-2685065	cg24626646	0.0654564	23.758	1.99644e-06	0.0106937	0	0	TTYH3	64	T0_vsT18
chr7:6746228-6746229	cg00504951	0.161673	23.5889	2.16248e-06	0.0106937	0	0	AC073343.13,ZNF12	45,26	T0_vsT18
chr7:23636918-23636919	cg00724124	0.038473	23.5958	2.15546e-06	0.0106937	0	0	CCDC126	22	T0_vsT18
chr7:66205334-66205335	cg25203256	0.0724356	23.7918	1.96478e-06	0.0106937	0	1	RP11-792A8.4,KCTD7,RABGEF1	11,95,62	T0_vsT18
chr9:140240933-140240934	cg01060168	0.881478	23.6032	2.14788e-06	0.0106937	0	0	EXD3	103	T0_vsT18
chr10:95721442-95721443	cg20431488	0.571201	23.732	2.02109e-06	0.0106937	0	1	PIPSL	8	T0_vsT18
chr11:57283220-57283221	cg14028489	0.0418515	23.6666	2.08449e-06	0.0106937	0	0	SLC43A1	50	T0_vsT18
chr11:62432647-62432648	cg23050254	0.0528649	23.806	1.95171e-06	0.0106937	0	0	METTL12,SNORA57,RP11-831H9.11,C11orf48	18,12,30,43	T0_vsT18
chr11:116968963-116968964	cg26341268	0.0337525	23.8478	1.91349e-06	0.0106937	0	0	AP000936.4,SIK3	15,95	T0_vsT18
chr12:56435595-56435596	cg19901123	0.0634269	23.6057	2.14541e-06	0.0106937	0	0	RPS26,RP11-603J24.4	17,21	T0_vsT18
chr12:79189766-79189767	ch.12.1596805R	0.0894986	23.6199	2.131e-06	0.0106937	0	0	.		T0_vsT18
chr12:133532882-133532883	cg12034979	0.0410645	23.6409	2.10993e-06	0.0106937	0	1	ZNF605,CHFR	33196	T0_vsT18
chr14:22471278-22471279	cg03490014	0.16874	23.5955	2.15575e-06	0.0106937	0	0	TRAV18	5	T0_vsT18
chr17:46669492-46669493	cg12744859	0.624807	23.677	2.07425e-06	0.0106937	0	0	HOXB5,HOXB3,HOXB-AS3	30208210	T0_vsT18
chr19:1020733-1020734	cg20147100	0.103377	23.5676	2.1843e-06	0.0106937	0	0	RNU6-2,TMEM259	6,27	T0_vsT18
chr19:13273910-13273911	cg02307165	0.0297491	23.8307	1.92903e-06	0.0106937	0	0	.		T0_vsT18
chr19:18210197-18210198	cg07993547	0.150955	23.5779	2.17376e-06	0.0106937	0	0	IL12RB1,MAST3	42,63	T0_vsT18
chr19:37178943-37178944	cg09984370	0.0937164	23.6267	2.12414e-06	0.0106937	0	0	AC074138.3,ZNF567	13,18	T0_vsT18
chr19:44079628-44079629	cg15056687	0.0282806	23.7446	2.00908e-06	0.0106937	0	0	L34079.4,PINLYP,XRCC1,L34079.2	4,26,38,37	T0_vsT18
chr20:3762116-3762117	cg01087594	0.0697482	23.562	2.1902e-06	0.0106937	0	0	SPEF1	17	T0_vsT18
chr22:41682343-41682344	cg16204370	0.0522613	23.5631	2.18905e-06	0.0106937	0	0	RANGAP1	44	T0_vsT18
chr1:43638365-43638366	cg01605945	0.0989198	23.4418	2.31827e-06	0.0110161	0	0	EBNA1BP2,WDR65	64,54	T0_vsT18
chr3:197687010-197687011	cg14344816	0.0416216	23.4189	2.34355e-06	0.0110161	0	0	LMLN,IQCG	34,56	T0_vsT18
chr5:176433795-176433796	cg21095732	0.102297	23.4567	2.30192e-06	0.0110161	0	0	UIMC1	54	T0_vsT18
chr7:148823862-148823863	cg04958124	0.0865791	23.467	2.29074e-06	0.0110161	0	0	RN7SL521P,ZNF425,ZNF398	11,24,45	T0_vsT18
chr11:65397877-65397878	cg10759459	0.771464	23.4259	2.3357e-06	0.0110161	0	0	PCNXL3	40	T0_vsT18
chrX:13396991-13396992	cg26025071	0.578515	23.4342	2.32665e-06	0.0110161	0	1	GPX1P1,RP11-1L9.1	5,13	T0_vsT18
chr8:145137371-145137372	cg23502362	0.0487595	23.3865	2.37973e-06	0.0111254	0	0	GPAA1	22	T0_vsT18
chr12:123717421-123717422	cg19858718	0.0422284	23.3597	2.41011e-06	0.0111462	0	0	MPHOSPH9,C12orf65	50,35	T0_vsT18
chr20:34287065-34287066	cg06545180	0.0428561	23.3613	2.40827e-06	0.0111462	0	0	ROMO1,NFS1	18,28	T0_vsT18
chr12:132628967-132628968	cg22312127	0.0505875	23.327	2.44767e-06	0.0112594	0	0	DDX51,NOC4L	30,33	T0_vsT18
chr4:129732975-129732976	cg21705476	0.0720787	23.3047	2.47371e-06	0.0113187	0	0	PHF17	59	T0_vsT18
chr2:64681735-64681736	cg10314172	0.0293156	23.2543	2.53336e-06	0.0114299	0	0	AC008074.3,LGALSL	20,12	T0_vsT18
chr2:113931538-113931539	cg00302479	0.0862703	23.2547	2.53297e-06	0.0114299	0	0	PSD4,AC016683.5	49,13	T0_vsT18
chr19:52693064-52693065	cg11357813	0.0304993	23.2506	2.53787e-06	0.0114299	0	0	PPP2R1A	30	T0_vsT18
chr6:149721457-149721458	cg01546424	0.87106	23.219	2.5761e-06	0.0115416	0	0	SUMO4,TAB2	11,69	T0_vsT18
chr2:232395326-232395327	cg18877969	0.126246	23.1907	2.61082e-06	0.0115965	0	0	NMUR1	27	T0_vsT18
chr19:1513379-1513380	cg05072175	0.0646179	23.1871	2.61531e-06	0.0115965	0	0	ADAMTSL5	30	T0_vsT18
chr7:56019574-56019575	cg08107767	0.0392184	23.1595	2.64971e-06	0.0116887	0	0	MRPS17,GBAS,MRPS17	14,38,14	T0_vsT18
chr21:15135043-15135044	cg08869875	0.581405	23.0677	2.7675e-06	0.0121461	0	1	FEM1AP1	6	T0_vsT18
chr9:131476799-131476800	cg00713427	0.812893	23.0523	2.78791e-06	0.0121735	0	0	PKN3	19	T0_vsT18
chr18:12702357-12702358	cg10672011	0.0782214	23.0017	2.85557e-06	0.0123437	0	0	CEP76,PSMG2	27,41	T0_vsT18
chr19:49622361-49622362	cg10591911	0.0548541	23.0116	2.84219e-06	0.0123437	0	0	C19orf73,PPFIA3	11,49	T0_vsT18
chr3:196295415-196295416	cg25628243	0.0538592	22.9579	2.91543e-06	0.0124888	0	0	WDR53,FBXO45	20,17	T0_vsT18
chr16:692375-692376	cg07843956	0.0476304	22.927	2.95846e-06	0.0124888	0	0	AL022341.1,FAM195A	16,24	T0_vsT18
chr16:11836567-11836568	cg23431756	0.0938065	22.9348	2.94752e-06	0.0124888	0	0	RP11-490O6.2,TXNDC11	20,44	T0_vsT18
chr16:87985059-87985060	cg06423975	0.0449645	22.9247	2.96173e-06	0.0124888	0	0	BANP	229	T0_vsT18
chr19:8372973-8372974	cg23963136	0.0422139	22.9463	2.9316e-06	0.0124888	0	0	CD320	23	T0_vsT18
chr22:38349509-38349510	cg22250642	0.061345	22.9108	2.98127e-06	0.0125098	0	0	C22orf23,POLR2F	25,71	T0_vsT18
chr2:17721775-17721776	cg23496400	0.579615	22.8993	2.99762e-06	0.0125174	0	0	VSNL1	49	T0_vsT18
chr9:99329240-99329241	cg01955020	0.0448121	22.8529	3.06442e-06	0.0125424	0	0	CDC14B	54	T0_vsT18
chr9:131266980-131266981	cg26580968	0.0788256	22.8815	3.02307e-06	0.0125424	0	0	GLE1	16	T0_vsT18
chr19:4909554-4909555	cg09317102	0.0391915	22.8446	3.07651e-06	0.0125424	0	0	UHRF1	90	T0_vsT18
chr19:18316102-18316103	cg10681125	0.0349254	22.8675	3.04329e-06	0.0125424	0	0	RAB3A,AC068499.10	19,26	T0_vsT18
chr19:36486149-36486150	cg26551346	0.0322761	22.8483	3.07106e-06	0.0125424	0	0	SDHAF1	14	T0_vsT18
chr19:46010633-46010634	cg03242360	0.103547	22.8239	3.1068e-06	0.0126061	0	0	VASP	18	T0_vsT18
chr2:220071637-220071638	cg19355685	0.0290424	22.7381	3.23607e-06	0.0127541	0	0	ZFAND2B	16	T0_vsT18
chr6:88411978-88411979	cg16426221	0.0355342	22.7463	3.22346e-06	0.0127541	0	0	AKIRIN2	22	T0_vsT18
chr11:118966313-118966314	cg03246824	0.0660168	22.7412	3.23129e-06	0.0127541	0	0	H2AFX	14	T0_vsT18
chr12:57928259-57928260	cg16237618	0.929858	22.7359	3.23938e-06	0.0127541	0	0	DCTN2	31	T0_vsT18
chr17:2699249-2699250	cg21526357	0.0944354	22.7602	3.20225e-06	0.0127541	0	0	RAP1GAP2	166	T0_vsT18
chr18:15001854-15001855	cg19406956	0.575337	22.7841	3.1661e-06	0.0127541	0	1	.		T0_vsT18
chr20:25176214-25176215	cg01217180	0.0515351	22.7309	3.24705e-06	0.0127541	0	0	ENTPD6	46	T0_vsT18
chr16:23652610-23652611	cg15645140	0.0325268	22.7148	3.27208e-06	0.012794	0	0	PALB2,DCTN5	29,30	T0_vsT18
chr19:17378213-17378214	cg08522101	0.0583413	22.6711	3.34069e-06	0.0130031	0	0	USHBP1,BABAM1,CTD-2278I10.6	52,24,39	T0_vsT18
chr11:103714411-103714412	ch.11.2134397R	0.0591734	22.6542	3.36751e-06	0.0130485	0	0	RP11-563P16.1	28	T0_vsT18
chr1:16533434-16533435	cg01719793	0.0729591	22.6398	3.39063e-06	0.0130791	0	0	ARHGEF19	27	T0_vsT18
chr22:20004364-20004365	cg18094551	0.0602551	22.6102	3.43879e-06	0.0132057	0	0	ARVCF,TANGO2	51,56	T0_vsT18
chr1:154245107-154245108	cg02260687	0.0532552	22.5444	3.54797e-06	0.0132121	0	0	HAX1	15	T0_vsT18
chr3:183353893-183353894	cg24399556	0.0862912	22.5585	3.52429e-06	0.0132121	0	0	KLHL24	27	T0_vsT18
chr6:90539556-90539557	cg22624253	0.113361	22.5699	3.50518e-06	0.0132121	0	0	CASP8AP2	20	T0_vsT18
chr7:2559827-2559828	cg06190346	0.0477323	22.5794	3.4895e-06	0.0132121	0	0	LFNG	60	T0_vsT18
chr7:72722951-72722952	cg01251255	0.043234	22.596	3.462e-06	0.0132121	0	1	NSUN5	21	T0_vsT18
chr17:45608823-45608824	cg26462239	0.490834	22.5885	3.4743e-06	0.0132121	0	1	NPEPPS	27	T0_vsT18
chr19:1905303-1905304	cg00558053	0.03644	22.5534	3.53288e-06	0.0132121	0	0	ADAT3,SCAMP4	23,44	T0_vsT18
chr12:133066492-133066493	cg25350087	0.104409	22.4862	3.64746e-06	0.0135241	0	0	FBRSL1	171	T0_vsT18
chr3:52291169-52291170	cg04104820	0.623243	22.3437	3.90339e-06	0.0140641	0	0	WDR82	54	T0_vsT18
chr11:122874364-122874365	cg26537719	0.8734	22.3843	3.82871e-06	0.0140641	0	0	.		T0_vsT18
chr12:48746089-48746090	cg19241322	0.876409	22.3753	3.84512e-06	0.0140641	0	0	ZNF641,RP11-370I10.6	24,28	T0_vsT18
chr14:92573075-92573076	cg00355673	0.0540601	22.3414	3.90757e-06	0.0140641	0	0	ATXN3	27	T0_vsT18
chr17:1389325-1389326	cg27307448	0.0582537	22.3597	3.87365e-06	0.0140641	0	0	MYO1C	79	T0_vsT18
chr19:43918882-43918883	cg21591754	0.766268	22.3435	3.90371e-06	0.0140641	0	0	TEX101	28	T0_vsT18
chr19:50381457-50381458	cg01906703	0.0499784	22.3667	3.86091e-06	0.0140641	0	0	AKT1S1,TBC1D17	43,40	T0_vsT18
chr7:44836109-44836110	cg08901752	0.035175	22.3237	3.9407e-06	0.0140657	0	0	PPIA	24	T0_vsT18
chr7:134916397-134916398	cg13965385	0.85828	22.3254	3.93755e-06	0.0140657	0	0	STRA8	33	T0_vsT18
chr1:17240752-17240753	cg05398833	0.0359072	22.3	3.98543e-06	0.0141087	0	0	CROCC	162	T0_vsT18
chr17:37009721-37009722	cg08488737	0.148491	22.2999	3.98556e-06	0.0141087	0	0	SNORA21,RPL23	16,23	T0_vsT18
chr19:12035674-12035675	cg10593256	0.0565126	22.2906	4.00331e-06	0.0141135	0	1	ZNF700,ZNF763,ZNF763	16,35,35	T0_vsT18
chr1:150946971-150946972	cg05931345	0.107313	22.2322	4.11612e-06	0.0141158	0	0	CERS2,RP11-316M1.3	38,19	T0_vsT18
chr1:153800699-153800700	cg01402255	0.39741	22.2623	4.05748e-06	0.0141158	0	0	GATAD2B	27	T0_vsT18
chr3:93698966-93698967	cg25809637	0.0335997	22.2427	4.09557e-06	0.0141158	0	0	ARL13B	27	T0_vsT18
chr10:3109530-3109531	cg21537413	0.082896	22.2675	4.04754e-06	0.0141158	0	0	RP11-118K6.3,PFKP	10142	T0_vsT18
chr13:113922076-113922077	cg11176835	0.887054	22.2572	4.06746e-06	0.0141158	0	0	.		T0_vsT18
chr16:70323488-70323489	cg06767762	0.072721	22.2503	4.08081e-06	0.0141158	0	0	AARS,DDX19B	41,44	T0_vsT18
chr19:4910272-4910273	cg22611064	0.0773137	22.2308	4.11884e-06	0.0141158	0	0	UHRF1	90	T0_vsT18
chr3:129262026-129262027	cg15606914	0.807692	22.1644	4.25119e-06	0.0145116	0	0	H1FOO	13	T0_vsT18
chr1:109825675-109825676	cg06804154	0.0733303	22.1067	4.36961e-06	0.0145613	0	0	PSRC1	17	T0_vsT18
chr4:668309-668310	cg26057380	0.0369979	22.1361	4.30901e-06	0.0145613	0	0	ATP5I,MYL5	24,38	T0_vsT18
chr4:125384961-125384962	cg14567203	0.63926	22.1019	4.37963e-06	0.0145613	0	1	TECRP2	1	T0_vsT18
chr5:179125478-179125479	cg08691740	0.0554774	22.1363	4.30845e-06	0.0145613	0	0	CANX	45	T0_vsT18
chr11:777775-777776	cg23660999	0.0765231	22.0997	4.38424e-06	0.0145613	0	0	AP006621.5,PDDC1	13,15	T0_vsT18
chr11:58397528-58397529	cg15785473	0.212056	22.1214	4.3392e-06	0.0145613	0	0	.		T0_vsT18
chr17:40897126-40897127	cg03623386	0.0749393	22.116	4.35039e-06	0.0145613	0	0	EZH1	22	T0_vsT18
chr18:77711201-77711202	cg15368769	0.0997859	22.0312	4.52986e-06	0.0149871	0	0	PQLC1	48	T0_vsT18
chr4:185306187-185306188	cg25556051	0.812165	21.9955	4.60767e-06	0.0150136	0	0	.		T0_vsT18
chr8:145139460-145139461	cg22420671	0.83668	21.9895	4.62067e-06	0.0150136	0	1	GPAA1	22	T0_vsT18
chr11:130184636-130184637	cg05641158	0.121635	21.9875	4.62517e-06	0.0150136	0	0	RP11-121M22.1,ZBTB44	34,35	T0_vsT18
chr19:10828691-10828692	cg14508213	0.0609581	22.0049	4.58707e-06	0.0150136	0	0	MIR638,DNM2	20,78	T0_vsT18
chr21:45751016-45751017	cg11795532	0.855767	22.0011	4.5952e-06	0.0150136	0	0	AP001062.8,AP001062.7,AP001062.1,C21orf2	12,23,11,44	T0_vsT18
chr4:83294881-83294882	cg02101219	0.0715532	21.9695	4.6651e-06	0.0150863	0	0	HNRNPD,RP11-127B20.3	30,19	T0_vsT18
chr6:53213754-53213755	cg10369451	0.0363004	21.9362	4.73966e-06	0.0151006	0	0	ELOVL5,RP3-483K16.4	47,16	T0_vsT18
chr9:136243221-136243222	cg15292567	0.036733	21.9432	4.72395e-06	0.0151006	0	0	SURF4,C9orf96	23,29	T0_vsT18
chr19:14016919-14016920	cg15572692	0.0370066	21.9563	4.69441e-06	0.0151006	0	0	C19orf57,CC2D1A	26,28	T0_vsT18
chr19:39322497-39322498	cg22982014	0.0355285	21.9362	4.73972e-06	0.0151006	0	0	ECH1,AC104534.3	19,18	T0_vsT18
chr16:68279304-68279305	cg04353881	0.0512368	21.9221	4.77179e-06	0.0151467	0	0	PLA2G15	24	T0_vsT18
chr1:36622515-36622516	cg01954647	0.0906317	21.853	4.93163e-06	0.015333	0	0	MAP7D1	46	T0_vsT18
chr1:155178431-155178432	cg11995261	0.0396303	21.8505	4.93746e-06	0.015333	0	0	MTX1,THBS3	25,49	T0_vsT18
chr1:155532716-155532717	cg20064047	0.0381093	21.8769	4.87566e-06	0.015333	0	1	ASH1L-AS1,ASH1L	17,62	T0_vsT18
chr6:26158832-26158833	cg10949413	0.338701	21.8848	4.85738e-06	0.015333	0	1	HIST1H2BD	25	T0_vsT18
chr6:163835251-163835252	cg13695877	0.0352372	21.863	4.90812e-06	0.015333	0	0	CAHM,QKI	10,44	T0_vsT18
chr7:30652139-30652140	cg09351960	0.911554	21.8628	4.90866e-06	0.015333	0	0	GARS	39	T0_vsT18
chr2:219745018-219745019	cg15641191	0.10867	21.8149	5.02222e-06	0.0155402	0	0	WNT10A	46	T0_vsT18
chr14:102606247-102606248	cg12983608	0.0733357	21.7998	5.05851e-06	0.0155963	0	0	HSP90AA1,WDR20	41,74	T0_vsT18
chr20:278801-278802	cg01335729	0.0287947	21.7864	5.091e-06	0.0156405	0	0	ZCCHC3,AL034548.1	16,16	T0_vsT18
chr2:128051925-128051926	cg26107076	0.0563993	21.7544	5.16921e-06	0.0156853	0	0	ERCC3	18	T0_vsT18
chr5:162883763-162883764	cg22183057	0.92047	21.7477	5.18591e-06	0.0156853	0	0	NUDCD2	25	T0_vsT18
chr6:107222842-107222843	cg02536995	0.896494	21.7594	5.15698e-06	0.0156853	0	0	RP1-60O19.1	30	T0_vsT18
chr9:131218455-131218456	cg21792562	0.0538639	21.7527	5.17344e-06	0.0156853	0	0	ODF2	37	T0_vsT18
chr15:41047657-41047658	cg19440278	0.0500142	21.7431	5.19736e-06	0.0156853	0	0	RMDN3	27	T0_vsT18
chr19:18723685-18723686	cg20548814	0.196174	21.736	5.21499e-06	0.0156853	0	0	TMEM59L	34	T0_vsT18
chr16:76269409-76269410	cg07649992	0.729933	21.7284	5.23395e-06	0.0156874	0	1	RPL18P13,RP11-150D5.2	6,12	T0_vsT18
chr1:976172-976173	cg23625715	0.0685932	21.7126	5.27341e-06	0.0157032	0	0	AGRN	92	T0_vsT18
chr16:88878482-88878483	cg10125625	0.0401086	21.7117	5.27573e-06	0.0157032	0	0	APRT	16	T0_vsT18
chr1:41827373-41827374	cg09992883	0.0360106	21.6773	5.36309e-06	0.0158536	0	0	FOXO6	36	T0_vsT18
chr19:38900029-38900030	cg22221067	0.801939	21.6783	5.36056e-06	0.0158536	0	0	RASGRP4	24	T0_vsT18
chr11:32338313-32338314	cg05034271	0.930721	21.6693	5.38376e-06	0.0158601	0	0	RP1-65P5.1	42	T0_vsT18
chr6:38608147-38608148	cg01894352	0.089116	21.6572	5.41484e-06	0.0158675	0	0	BTBD9	118	T0_vsT18
chr11:9595214-9595215	cg20903764	0.0366513	21.6361	5.46979e-06	0.0158675	0	0	WEE1	33	T0_vsT18
chr11:118868654-118868655	cg13251256	0.042199	21.6488	5.43678e-06	0.0158675	0	0	RP11-110I1.12,CCDC84	17,26	T0_vsT18
chr14:50087093-50087094	cg01797567	0.0666139	21.6348	5.47324e-06	0.0158675	0	0	MGAT2,RPL36AL	19,21	T0_vsT18
chr21:28516138-28516139	cg10405333	0.535044	21.6328	5.47847e-06	0.0158675	0	1	GPX1P2	5	T0_vsT18
chr3:154042079-154042080	cg18185028	0.652723	21.5856	5.60341e-06	0.0160173	0	0	DHX36	25	T0_vsT18
chr9:130680123-130680124	cg11874319	0.342801	21.5782	5.62332e-06	0.0160173	0	0	ST6GALNAC4	27	T0_vsT18
chr17:33734847-33734848	cg04300553	0.721548	21.5798	5.61882e-06	0.0160173	0	0	RP11-686D22.8,RP11-686D22.3	4,4	T0_vsT18
chr17:79995744-79995745	cg06247470	0.0868835	21.6035	5.55568e-06	0.0160173	0	0	DCXR,RP13-650J16.1	16,15	T0_vsT18
chr22:23842503-23842504	cg25538103	0.590319	21.5828	5.61097e-06	0.0160173	0	1	.		T0_vsT18
chr3:49977388-49977389	cg15146556	0.0306472	21.5664	5.65502e-06	0.0160545	0	0	RBM6	57	T0_vsT18
chr16:89557368-89557369	cg06477423	0.0432763	21.5503	5.69864e-06	0.0161251	0	0	SPG7,ANKRD11	136345	T0_vsT18
chr14:93582455-93582456	cg10527288	0.0663521	21.5136	5.79953e-06	0.0163568	0	0	ITPK1	126	T0_vsT18
chr14:50779024-50779025	cg21990063	0.0370289	21.4928	5.85753e-06	0.0164051	0	0	ATP5S,L2HGDH	31,23	T0_vsT18
chr14:105957522-105957523	cg18679920	0.0707906	21.487	5.87387e-06	0.0164051	0	0	CRIP1,C14orf80	38,41	T0_vsT18
chr19:54694872-54694873	cg05314090	0.0702326	21.4896	5.86662e-06	0.0164051	0	0	TSEN34,MBOAT7	32,43	T0_vsT18
chr11:47291115-47291116	cg24099544	0.0350057	21.4778	5.89964e-06	0.0164237	0	0	MADD	58	T0_vsT18
chr11:10529463-10529464	cg20450977	0.213744	21.4435	5.99735e-06	0.0166419	0	1	MTRNR2L8	9	T0_vsT18
chr1:82268649-82268650	cg04226724	0.182768	21.4338	6.02513e-06	0.0166562	0	0	LPHN2	118	T0_vsT18
chr11:66247820-66247821	cg08315050	0.0479003	21.4215	6.0606e-06	0.0166562	0	0	CTD-3074O7.5,DPP3	22,35	T0_vsT18
chr13:31897413-31897414	cg05706719	0.918227	21.428	6.04183e-06	0.0166562	0	0	B3GALTL	28	T0_vsT18
chr12:101801830-101801831	cg07211103	0.0595381	21.3995	6.1248e-06	0.016779	0	0	ARL1	23	T0_vsT18
chr20:33735161-33735162	cg06144080	0.0549919	21.3688	6.21548e-06	0.0169734	0	0	EDEM2	100	T0_vsT18
chr1:101701819-101701820	cg20740769	0.0610497	21.2942	6.4414e-06	0.0170664	0	0	RP4-575N6.4,S1PR1	18,27	T0_vsT18
chr3:50336854-50336855	cg18050165	0.0725213	21.3079	6.39933e-06	0.0170664	0	0	NAT6,HYAL3	26,33	T0_vsT18
chr5:4321970-4321971	ch.5.158370R	0.0410104	21.2729	6.50747e-06	0.0170664	0	0	.		T0_vsT18
chr6:33359518-33359519	cg25741047	0.0598347	21.3187	6.36635e-06	0.0170664	0	0	KIFC1	89	T0_vsT18
chr6:134473373-134473374	ch.6.134515066F	0.0890327	21.274	6.50383e-06	0.0170664	0	1	.		T0_vsT18
chr7:766323-766324	cg19157140	0.0479357	21.3292	6.33439e-06	0.0170664	0	0	PRKAR1B,HEATR2	275159	T0_vsT18
chr11:67799551-67799552	cg26703857	0.784326	21.3105	6.39118e-06	0.0170664	0	0	NDUFS8	28	T0_vsT18
chr14:55738124-55738125	cg10378898	0.0356538	21.3425	6.29432e-06	0.0170664	0	0	RP11-665C16.6,FBXO34	27,54	T0_vsT18
chr15:76553926-76553927	cg19259030	0.48059	21.2731	6.50668e-06	0.0170664	0	0	TYRO3P,ETFA	7,34	T0_vsT18
chr16:56965804-56965805	cg04347867	0.0873464	21.2874	6.4623e-06	0.0170664	0	0	HERPUD1	25	T0_vsT18
chr17:7383041-7383042	cg01425110	0.0402076	21.305	6.40806e-06	0.0170664	0	0	ZBTB4	56	T0_vsT18
chr20:35504371-35504372	cg09241885	0.819466	21.312	6.38677e-06	0.0170664	0	0	TLDC2	20	T0_vsT18
chr22:38864121-38864122	cg17159837	0.0423723	21.2952	6.43835e-06	0.0170664	0	0	KDELR3	15	T0_vsT18
chr16:21611122-21611123	cg11869721	0.081207	21.265	6.53197e-06	0.0170786	0	0	METTL9	61	T0_vsT18
chr1:16563727-16563728	cg22391883	0.034265	21.2204	6.67306e-06	0.0171659	0	0	RSG1	13	T0_vsT18
chr1:228401278-228401279	cg18159850	0.0470266	21.2369	6.62055e-06	0.0171659	0	0	C1orf145,OBSCN	28166	T0_vsT18
chr2:219745020-219745021	cg10753443	0.13218	21.2154	6.68889e-06	0.0171659	0	0	WNT10A	46	T0_vsT18
chr2:238875575-238875576	cg08252533	0.0508071	21.2086	6.71098e-06	0.0171659	0	0	UBE2F,UBE2F-SCLY	46,91	T0_vsT18
chr11:61100525-61100526	cg23053918	0.0430683	21.2393	6.61284e-06	0.0171659	0	0	DAK,DDB1	44,60	T0_vsT18
chr11:62554881-62554882	cg18394496	0.0354076	21.2189	6.67796e-06	0.0171659	0	0	TMEM223,RP11-727F15.12,TMEM179B	39,14,17	T0_vsT18
chr12:3000126-3000127	cg22016818	0.0481752	21.198	6.74494e-06	0.0171659	0	0	TULP3	53	T0_vsT18
chr14:71108484-71108485	cg25648091	0.0819225	21.1997	6.73941e-06	0.0171659	0	0	CTD-2540L5.5,CTD-2540L5.6,TTC9	32,19,29	T0_vsT18
chr14:89290489-89290490	cg11899804	0.217426	21.2032	6.72818e-06	0.0171659	0	0	TTC8	35	T0_vsT18
chr19:10676770-10676771	cg25308054	0.0778588	21.1915	6.76617e-06	0.0171691	0	0	KRI1	29	T0_vsT18
chr4:83934056-83934057	cg19556948	0.110665	21.167	6.84599e-06	0.0172193	0	0	LIN54	44	T0_vsT18
chr8:71159989-71159990	cg16282160	0.897038	21.1715	6.83114e-06	0.0172193	0	0	NCOA2	90	T0_vsT18
chr11:62599584-62599585	cg24838517	0.129492	21.1735	6.82451e-06	0.0172193	0	0	RP11-727F15.9,STX5	15,23	T0_vsT18
chr1:1243460-1243461	cg15042692	0.0501781	21.1551	6.88506e-06	0.0172671	0	0	ACAP3,PUSL1	60,26	T0_vsT18
chr16:75322931-75322932	cg17654763	0.77055	21.1228	6.99229e-06	0.0174343	0	0	.		T0_vsT18
chr20:32274559-32274560	cg10704770	0.106859	21.1269	6.97878e-06	0.0174343	0	0	E2F1	17	T0_vsT18
chr3:138553774-138553775	cg21798964	0.0675244	21.1116	7.0299e-06	0.0174774	0	0	PIK3CB	46	T0_vsT18
chr1:202927433-202927434	cg15730680	0.100095	21.103	7.05907e-06	0.0174994	0	0	ADIPOR1	27	T0_vsT18
chr3:58477614-58477615	cg11495915	0.0462689	21.0903	7.10218e-06	0.01751	0	0	RP11-359I18.5,KCTD6	9,23	T0_vsT18
chr11:6948101-6948102	cg10765857	0.489364	21.0838	7.12442e-06	0.01751	0	0	ZNF215	23	T0_vsT18
chr16:2532921-2532922	cg21791024	0.707375	21.0883	7.10893e-06	0.01751	0	0	TBC1D24	42	T0_vsT18
chr12:81110653-81110654	cg12815941	0.350079	21.0503	7.23957e-06	0.0177423	0	0	MYF5	17	T0_vsT18
chr6:90529529-90529530	cg25131503	0.0330572	21.0014	7.41145e-06	0.0178953	0	0	MDN1	41	T0_vsT18
chr7:45144652-45144653	cg20023356	0.881458	21.0022	7.40846e-06	0.0178953	0	0	TBRG4,SNORA5A,SNORA5C	40,14,7	T0_vsT18
chr7:140178937-140178938	cg04828277	0.0476007	20.9971	7.42681e-06	0.0178953	0	0	MKRN1	26	T0_vsT18
chr11:118661172-118661173	cg19039771	0.0882978	21.0119	7.37433e-06	0.0178953	0	0	DDX6	20	T0_vsT18
chr15:44719311-44719312	cg10956385	0.111505	21.0098	7.38159e-06	0.0178953	0	0	CTDSPL2,RP11-516C1.1	31,18	T0_vsT18
chr17:1958412-1958413	cg01168201	0.10385	21.019	7.34916e-06	0.0178953	0	0	HIC1	64	T0_vsT18
chr2:113403533-113403534	cg10762132	0.0406335	20.9813	7.48303e-06	0.0179804	0	0	AC079922.3,SLC20A1	14,27	T0_vsT18
chr16:3014183-3014184	cg05913514	0.106882	20.9754	7.5043e-06	0.0179813	0	0	KREMEN2	25	T0_vsT18
chr12:49453711-49453712	cg13653195	0.0284159	20.9562	7.57392e-06	0.0180651	0	0	KMT2D	48	T0_vsT18
chr22:17640260-17640261	cg02525682	0.0346843	20.9541	7.58128e-06	0.0180651	0	0	CECR5,CECR5-AS1	35,18	T0_vsT18
chr9:36572887-36572888	cg15729705	0.0530116	20.9358	7.64833e-06	0.0181745	0	0	MELK	25	T0_vsT18
chr16:89789813-89789814	cg23224881	0.665636	20.9193	7.70916e-06	0.0182309	0	0	ZNF276	36	T0_vsT18
chr19:3359809-3359810	cg25834275	0.0602886	20.9178	7.71447e-06	0.0182309	0	0	NFIC	120	T0_vsT18
chr12:110337981-110337982	cg17155907	0.0402942	20.8734	7.88057e-06	0.0185725	0	0	TCHP	69	T0_vsT18
chr21:44299176-44299177	cg16830966	0.041628	20.8653	7.91122e-06	0.0185937	0	0	WDR4,NDUFV3	46,42	T0_vsT18
chr19:17324035-17324036	cg09203597	0.812685	20.8545	7.9523e-06	0.0186394	0	0	MYO9B	98	T0_vsT18
chr2:220042941-220042942	cg21586955	0.037089	20.7895	8.2046e-06	0.019109	0	0	FAM134A,CNPPD1	19,19	T0_vsT18
chr6:31673423-31673424	cg24839562	0.666588	20.7857	8.21929e-06	0.019109	0	0	LY6G6F,MEGT1,XXbac-BPG32J3.20	32,32,93	T0_vsT18
chr7:944752-944753	cg24335793	0.796354	20.7907	8.19957e-06	0.019109	0	0	ADAP1,COX19	139189	T0_vsT18
chr19:4910274-4910275	cg12159575	0.0620872	20.7728	8.27058e-06	0.0191764	0	0	UHRF1	90	T0_vsT18
chr17:73390116-73390117	cg09710517	0.0878496	20.7663	8.29652e-06	0.0191848	0	0	RP11-16C1.1,GRB2	8,65	T0_vsT18
chr2:37375983-37375984	cg22683283	0.570046	20.7567	8.33489e-06	0.0192219	0	1	AC007899.3,EIF2AK2	6,28	T0_vsT18
chr20:5107446-5107447	cg04562739	0.0467031	20.7482	8.36897e-06	0.0192489	0	0	PCNA,CDS2	38,47	T0_vsT18
chr3:52739740-52739741	cg15811149	0.0390962	20.741	8.39785e-06	0.0192638	1	0	GLT8D1,SPCS1	36,28	T0_vsT18
chr9:132404430-132404431	cg23194006	0.0479363	20.7165	8.49715e-06	0.0193881	0	0	ASB6	15	T0_vsT18
chr22:31608270-31608271	cg10493356	0.0354706	20.7212	8.47783e-06	0.0193881	0	0	LIMK2	63	T0_vsT18
chr2:232329096-232329097	cg00616369	0.0433167	20.635	8.8366e-06	0.019651	0	0	NCL	41	T0_vsT18
chr3:48130818-48130819	cg16755393	0.113166	20.6409	8.8113e-06	0.019651	0	0	MAP4	72	T0_vsT18
chr4:79093019-79093020	cg06837034	0.592937	20.6703	8.6878e-06	0.019651	0	0	FRAS1	98	T0_vsT18
chr9:131709795-131709796	cg11952076	0.0600659	20.6548	8.75262e-06	0.019651	0	0	RP11-101E3.5,DOLK,NUP188	25,21,32	T0_vsT18
chr11:62599574-62599575	cg22690239	0.146952	20.6546	8.75369e-06	0.019651	0	0	RP11-727F15.9,STX5	15,23	T0_vsT18
chr11:105947257-105947258	cg26869362	0.0676972	20.6529	8.76093e-06	0.019651	0	0	KBTBD3,AASDHPPT	36,36	T0_vsT18
chr12:96252937-96252938	cg21011043	0.0313542	20.6465	8.78769e-06	0.019651	0	0	SNRPF,RP11-536G4.2	29,38	T0_vsT18
chr16:67700802-67700803	cg10238213	0.102234	20.6809	8.64353e-06	0.019651	0	0	C16orf86,ENKD1	15,18	T0_vsT18
chr19:4639662-4639663	cg04765929	0.0972642	20.634	8.84077e-06	0.019651	0	0	TNFAIP8L1	28	T0_vsT18
chr22:36648692-36648693	cg08775793	0.845034	20.674	8.67252e-06	0.019651	0	1	APOL1	14	T0_vsT18
chr15:44829300-44829301	cg24968576	0.0388252	20.6182	8.90816e-06	0.0197497	0	0	EIF3J,EIF3J-AS1	28,18	T0_vsT18
chr2:72578315-72578316	cg14819352	0.859327	20.5634	9.14586e-06	0.0198091	0	0	EXOC6B	77	T0_vsT18
chr3:49754249-49754250	cg07181915	0.790095	20.5708	9.11332e-06	0.0198091	0	0	RNF123	55	T0_vsT18
chr4:1872199-1872200	cg20906948	0.0775736	20.5548	9.18385e-06	0.0198091	0	0	RN7SL671P,WHSC1	4101	T0_vsT18
chr5:79950383-79950384	cg14865507	0.091559	20.5726	9.10564e-06	0.0198091	0	0	DHFR,MSH3	30,42	T0_vsT18
chr10:88471748-88471749	cg01657744	0.053531	20.575	9.09511e-06	0.0198091	0	0	LDB3	51	T0_vsT18
chr11:10531091-10531092	cg05740793	0.255131	20.6008	8.98307e-06	0.0198091	0	1	MTRNR2L8	9	T0_vsT18
chr12:112563698-112563699	cg27093000	0.0388827	20.5714	9.11072e-06	0.0198091	0	0	TRAFD1	21	T0_vsT18
chr13:78493583-78493584	cg26022015	0.215798	20.5793	9.07625e-06	0.0198091	0	0	EDNRB,RNF219-AS1	50172	T0_vsT18
chr13:89277884-89277885	cg18031591	0.891178	20.6066	8.95798e-06	0.0198091	0	0	LINC00560	2	T0_vsT18
chr14:105956406-105956407	cg10900643	0.0693123	20.5648	9.13987e-06	0.0198091	0	0	CRIP1,C14orf80	38,41	T0_vsT18
chr21:47878552-47878553	cg19247551	0.0361074	20.5538	9.18824e-06	0.0198091	0	0	DIP2A	63	T0_vsT18
chr7:25897344-25897345	cg03594908	0.307336	20.5203	9.33726e-06	0.02008	0	0	.		T0_vsT18
chr3:197463845-197463846	cg10624175	0.051437	20.4875	9.48595e-06	0.0202479	0	0	KIAA0226,FYTTD1	76,54	T0_vsT18
chr9:131799192-131799193	cg07523904	0.083797	20.4937	9.45759e-06	0.0202479	0	0	FAM73B	27	T0_vsT18
chr22:50639218-50639219	cg19216490	0.0843182	20.488	9.48354e-06	0.0202479	0	0	RP3-402G11.26,SELO	12,35	T0_vsT18
chr10:23003653-23003654	cg11965880	0.0339738	20.4805	9.51765e-06	0.0202653	0	0	PIP4K2A	97	T0_vsT18
chr10:130834003-130834004	cg09580822	0.108021	20.4608	9.60838e-06	0.020408	0	0	.		T0_vsT18
chr11:75230135-75230136	cg05521767	0.485631	20.4355	9.72582e-06	0.0206065	0	0	GDPD5	78	T0_vsT18
chr2:162164767-162164768	cg23655816	0.0662448	20.4174	9.81103e-06	0.0206886	0	0	PSMD14	34	T0_vsT18
chr4:165109574-165109575	cg15645344	0.649753	20.4171	9.81265e-06	0.0206886	0	1	RP11-39C10.1,MARCH1	6,94	T0_vsT18
chr8:58021698-58021699	cg01759906	0.578382	20.3891	9.94532e-06	0.020917	0	1	.		T0_vsT18
chr10:32217898-32217899	cg13593941	0.0700021	20.3781	9.99842e-06	0.0209774	0	0	ARHGAP12	55	T0_vsT18
chr1:165620027-165620028	cg15622113	0.921578	20.3678	1.0048e-05	0.0209791	0	0	MGST3	31	T0_vsT18
chr18:47814178-47814179	cg13423076	0.0552889	20.3688	1.0043e-05	0.0209791	0	0	CXXC1	21	T0_vsT18
chr2:65659605-65659606	cg22373079	0.136754	20.3615	1.00783e-05	0.0209914	0	0	SPRED2	81	T0_vsT18
chr2:109892198-109892199	cg25887811	0.757752	20.3381	1.01926e-05	0.0210966	0	0	SH3RF3	201	T0_vsT18
chr11:60906582-60906583	cg07179634	0.194943	20.343	1.01687e-05	0.0210966	0	0	VPS37C	31	T0_vsT18
chr17:79319836-79319837	cg15376949	0.0768865	20.3361	1.02024e-05	0.0210966	0	0	.		T0_vsT18
chr9:134495123-134495124	cg08187943	0.855156	20.3266	1.02492e-05	0.0211426	0	0	RAPGEF1	100	T0_vsT18
chr14:105679810-105679811	cg05175112	0.750796	20.3141	1.03113e-05	0.0212198	0	0	BRF1	165	T0_vsT18
chr1:47082220-47082221	cg26914061	0.157593	20.292	1.04215e-05	0.0213398	0	0	MOB3C,MKNK1	23,62	T0_vsT18
chr5:145562478-145562479	cg17175376	0.0969965	20.2542	1.0613e-05	0.0213398	0	0	LARS	28	T0_vsT18
chr6:31745905-31745906	cg09590636	0.830284	20.2532	1.06177e-05	0.0213398	0	0	VWA7,VARS	66106	T0_vsT18
chr6:90062706-90062707	cg01069753	0.0572449	20.2647	1.05593e-05	0.0213398	0	0	UBE2J1	18	T0_vsT18
chr6:99282348-99282349	cg24474130	0.15932	20.255	1.06085e-05	0.0213398	0	0	POU3F2	17	T0_vsT18
chr15:42187219-42187220	cg25507299	0.0438212	20.2588	1.05893e-05	0.0213398	0	0	SPTBN5,RP11-23P13.6	40,22	T0_vsT18
chr15:83735668-83735669	cg12435359	0.0493657	20.2656	1.05544e-05	0.0213398	0	0	MIR4515,BTBD1,RP11-382A20.5,RP11-382A20.6	10,33,101,34	T0_vsT18
chr16:89203153-89203154	cg00144414	0.864849	20.2688	1.05383e-05	0.0213398	0	0	ACSF3	137	T0_vsT18
chr17:79935490-79935491	cg21631606	0.0544105	20.254	1.06136e-05	0.0213398	0	0	ASPSCR1	79	T0_vsT18
chr21:46707857-46707858	cg20896738	0.0427896	20.2887	1.04381e-05	0.0213398	0	0	POFUT2,BX322557.10	50,20	T0_vsT18
chr11:33279776-33279777	cg04024681	0.0649724	20.2377	1.06974e-05	0.0214	0	0	HIPK3	45	T0_vsT18
chr18:44337910-44337911	cg15049968	0.175664	20.241	1.06806e-05	0.0214	0	0	RP11-742D12.2,ST8SIA5	10,29	T0_vsT18
chr14:73493951-73493952	cg18867321	0.0573999	20.2283	1.07459e-05	0.0214473	0	0	ZFYVE1	43	T0_vsT18
chr1:9599419-9599420	cg06347499	0.0706375	20.2089	1.08468e-05	0.0215265	0	0	SLC25A33	24	T0_vsT18
chr10:114710018-114710019	cg04266779	0.0956258	20.2025	1.08805e-05	0.0215265	1	0	TCF7L2	149	T0_vsT18
chr14:21989279-21989280	cg23140396	0.536301	20.2015	1.08857e-05	0.0215265	0	1	AE000658.22,SALL2	2,20	T0_vsT18
chr19:55988027-55988028	cg04685880	0.0480186	20.2124	1.08288e-05	0.0215265	0	0	CTD-2537I9.16,ZNF628	13,27	T0_vsT18
chr2:153573528-153573529	cg12712871	0.0976476	20.1786	1.10064e-05	0.0215587	1	0	PRPF40A,ARL6IP6	31,24	T0_vsT18
chr2:204192854-204192855	cg05983229	0.0577759	20.1919	1.0936e-05	0.0215587	0	0	ABI2	44	T0_vsT18
chr2:219268015-219268016	cg25468488	0.906511	20.1779	1.10099e-05	0.0215587	0	0	CTDSP1	38	T0_vsT18
chr8:23145501-23145502	cg10890518	0.126978	20.1817	1.09902e-05	0.0215587	0	0	R3HCC1	28	T0_vsT18
chr12:51566828-51566829	cg20392585	0.128673	20.1747	1.10273e-05	0.0215587	0	0	TFCP2	30	T0_vsT18
chr17:18163844-18163845	cg17154187	0.0300891	20.1676	1.10648e-05	0.0215829	0	0	MIEF2	26	T0_vsT18
chr20:35402306-35402307	cg12601032	0.105365	20.1449	1.11865e-05	0.0217709	0	0	DSN1	27	T0_vsT18
chr2:241364175-241364176	cg23079958	0.901919	20.1327	1.12522e-05	0.0218002	0	0	.		T0_vsT18
chr19:19249429-19249430	cg26112243	0.0373846	20.1366	1.12313e-05	0.0218002	0	0	TMEM161A	21	T0_vsT18
chr22:50689941-50689942	cg00711351	0.0693711	20.1238	1.13006e-05	0.0218448	0	0	HDAC10,MAPK12	29,47	T0_vsT18
chr12:12869779-12869780	cg08659824	0.111504	20.1078	1.13884e-05	0.0218671	0	0	CDKN1B	37	T0_vsT18
chr19:40930735-40930736	cg00540558	0.124536	20.1085	1.13846e-05	0.0218671	0	0	SERTAD1	15	T0_vsT18
chr22:29663810-29663811	cg02226779	0.0448909	20.115	1.1349e-05	0.0218671	0	0	RHBDD3,EWSR1	30,31	T0_vsT18
chr22:20119463-20119464	cg25650110	0.0756052	20.0966	1.14499e-05	0.021936	0	0	ZDHHC8	26	T0_vsT18
chr16:31085976-31085977	cg09512322	0.0596182	20.0656	1.16225e-05	0.0222174	0	0	ZNF646,ZNF668	35,9	T0_vsT18
chr6:33290977-33290978	cg04152866	0.0530764	20.0486	1.17179e-05	0.0223025	0	0	DAXX	96	T0_vsT18
chr7:2354044-2354045	cg01302712	0.0396019	20.0484	1.17189e-05	0.0223025	0	0	SNX8	111	T0_vsT18
chr19:4182521-4182522	cg15635336	0.0622569	20.0274	1.18384e-05	0.0224306	0	0	SIRT6,ANKRD24	19,40	T0_vsT18
chr19:36393325-36393326	cg16001418	0.120683	20.0276	1.18374e-05	0.0224306	0	0	HCST,NFKBID	8,23	T0_vsT18
chr1:155658431-155658432	cg23799056	0.094123	20.0219	1.18697e-05	0.0224406	0	1	YY1AP1,DAP3,MSTO1,MSTO2P	35,40,90,90	T0_vsT18
chr20:34330300-34330301	cg07484894	0.123542	20.0039	1.19735e-05	0.0225871	0	0	RBM39	39	T0_vsT18
chr13:26828082-26828083	cg04701243	0.105953	19.9893	1.2058e-05	0.0225978	0	0	CDK8	28	T0_vsT18
chr19:10515578-10515579	cg00876541	0.0968784	19.9907	1.205e-05	0.0225978	0	0	MIR1181,CDC37	11,51	T0_vsT18
chr19:18304045-18304046	cg13619606	0.0389003	19.9896	1.2056e-05	0.0225978	0	0	MPV17L2	14	T0_vsT18
chr1:89151226-89151227	cg26777712	0.0363057	19.9764	1.21333e-05	0.0226895	0	0	PKN2,RP11-76N22.2	36,28	T0_vsT18
chr10:126392148-126392149	cg05902968	0.912868	19.9602	1.22281e-05	0.0228172	0	0	RP11-464O2.2,RP11-12J10.3,FAM53B	12150125	T0_vsT18
chr3:125239063-125239064	cg21830066	0.043814	19.9544	1.22625e-05	0.0228318	0	0	SNX4	23	T0_vsT18
chr1:36107132-36107133	cg09070503	0.0351067	19.9419	1.23366e-05	0.0229203	0	0	PSMB2	18	T0_vsT18
chr12:132674334-132674335	cg04913963	0.0396594	19.9369	1.23668e-05	0.0229267	0	0	RP13-977J11.2,RP13-977J11.8	15,11	T0_vsT18
chr7:2677933-2677934	cg11165402	0.687556	19.9163	1.249e-05	0.0231054	0	0	TTYH3	64	T0_vsT18
chr11:125495865-125495866	cg02121704	0.0938618	19.9098	1.25295e-05	0.0231288	0	0	CHEK1	31	T0_vsT18
chr16:89918146-89918147	cg15953586	0.807862	19.9048	1.25597e-05	0.0231349	0	0	SPIRE2	82	T0_vsT18
chr6:30421566-30421567	cg13903409	0.170483	19.8835	1.26892e-05	0.0232775	0	0	.		T0_vsT18
chr16:89787478-89787479	cg21306218	0.0509549	19.8832	1.26913e-05	0.0232775	1	0	ZNF276,VPS9D1	36,38	T0_vsT18
chr19:39697154-39697155	cg18604395	0.840075	19.8785	1.27199e-05	0.0232804	0	0	.		T0_vsT18
chr5:154238152-154238153	cg25421835	0.0740095	19.8585	1.28437e-05	0.023457	0	0	FAXDC2,CNOT8	53,30	T0_vsT18
chr16:67215239-67215240	cg00863397	0.762363	19.8473	1.29134e-05	0.0235343	0	0	KIAA0895L	31	T0_vsT18
chr2:44001147-44001148	cg14041007	0.176142	19.8248	1.30542e-05	0.0235612	0	0	DYNC2LI1	15	T0_vsT18
chr7:100720937-100720938	cg23296816	0.108393	19.8232	1.30641e-05	0.0235612	0	0	.		T0_vsT18
chr11:64645578-64645579	cg23926688	0.105239	19.8338	1.29975e-05	0.0235612	0	0	EHD1	66	T0_vsT18
chr12:19593453-19593454	cg08078137	0.712805	19.8231	1.30651e-05	0.0235612	0	0	AEBP2	72	T0_vsT18
chr19:11427895-11427896	cg24390156	0.910121	19.8265	1.30435e-05	0.0235612	0	0	TSPAN16,CTC-510F12.4	12,4	T0_vsT18
chr8:28243934-28243935	cg13411962	0.0950105	19.8045	1.3183e-05	0.0236746	0	0	ZNF395,FBXO16	58112	T0_vsT18
chr16:89724451-89724452	cg21864071	0.0834894	19.8079	1.31611e-05	0.0236746	0	0	CHMP1A,SPATA33	35,28	T0_vsT18
chr1:67896816-67896817	cg18760173	0.0929031	19.7348	1.36339e-05	0.023786	0	0	SERBP1	29	T0_vsT18
chr2:74406064-74406065	cg00327537	0.0393601	19.7681	1.34166e-05	0.023786	0	0	MOB1A	18	T0_vsT18
chr2:219433113-219433114	cg14238478	0.0338596	19.7433	1.35781e-05	0.023786	0	0	RQCD1,USP37	34,40	T0_vsT18
chr3:52091604-52091605	cg02974815	0.0734575	19.7691	1.34098e-05	0.023786	0	0	DUSP7	21	T0_vsT18
chr5:37371179-37371180	cg24993015	0.0290155	19.7309	1.36598e-05	0.023786	0	0	NUP155	23	T0_vsT18
chr5:148205612-148205613	cg06772609	0.085521	19.7318	1.36539e-05	0.023786	0	0	ADRB2	14	T0_vsT18
chr5:149111604-149111605	cg25768776	0.128211	19.7461	1.35597e-05	0.023786	0	0	MIR378A,PPARGC1B	8,59	T0_vsT18
chr9:214915-214916	cg20229853	0.0541651	19.752	1.35211e-05	0.023786	0	0	C9orf66,DOCK8	12,52	T0_vsT18
chr12:11765813-11765814	cg16175737	0.670474	19.7784	1.33498e-05	0.023786	1	1	.		T0_vsT18
chr14:69658235-69658236	cg13375792	0.0402504	19.7472	1.35525e-05	0.023786	0	0	RP11-363J20.1,EXD2	39,40	T0_vsT18
chr15:58752117-58752118	cg09280213	0.282102	19.7898	1.32767e-05	0.023786	0	0	RP11-355N15.1,ALDH1A2,LIPC	27,170,73	T0_vsT18
chr16:56691849-56691850	cg00005010	0.0803705	19.7395	1.36034e-05	0.023786	0	0	MT1F	14	T0_vsT18
chr19:48111325-48111326	cg00254978	0.0319495	19.7562	1.34935e-05	0.023786	0	0	GLTSCR1,CTD-2571L23.8	54,86	T0_vsT18
chr20:19892382-19892383	cg24001015	0.875333	19.786	1.33011e-05	0.023786	0	0	RIN2	68	T0_vsT18
chr22:39548585-39548586	cg20693706	0.0350624	19.776	1.33652e-05	0.023786	0	0	CBX7	42	T0_vsT18
chr2:191745736-191745737	cg16975027	0.0463307	19.7112	1.37902e-05	0.0239645	0	0	AC005540.3,GLS	10,39	T0_vsT18
chr9:35080138-35080139	cg12847655	0.0918727	19.6994	1.38691e-05	0.024053	0	0	FANCG	21	T0_vsT18
chr6:43021567-43021568	cg01970114	0.0379028	19.6896	1.39347e-05	0.0241183	0	0	CUL7,KLC4	30,60	T0_vsT18
chr11:63719508-63719509	cg11568498	0.17955	19.667	1.40883e-05	0.0241878	0	0	NAA40	16	T0_vsT18
chr11:118443240-118443241	cg16866038	0.0608602	19.6701	1.40672e-05	0.0241878	0	0	IFT46,ARCN1	38,21	T0_vsT18
chr15:91537971-91537972	cg12467864	0.0416712	19.663	1.41155e-05	0.0241878	0	0	PRC1	36	T0_vsT18
chr19:9945708-9945709	cg04699474	0.0829358	19.6721	1.4053e-05	0.0241878	0	0	CTD-2623N2.11,PIN1	17,24	T0_vsT18
chr19:56652453-56652454	cg08684551	0.069708	19.669	1.40741e-05	0.0241878	0	0	ZNF444	39	T0_vsT18
chr2:70237036-70237037	cg04367729	0.865811	19.6434	1.42494e-05	0.0242777	0	0	PCBP1-AS1	62	T0_vsT18
chr9:6757454-6757455	cg23849946	0.0562119	19.6368	1.42948e-05	0.0242777	0	0	KDM4C	82	T0_vsT18
chr9:123476838-123476839	cg11478748	0.0348527	19.6314	1.43325e-05	0.0242777	0	0	MEGF9	30	T0_vsT18
chr9:137001058-137001059	cg15541632	0.0548802	19.6307	1.43373e-05	0.0242777	0	0	LL09NC01-251B2.3,WDR5	12,35	T0_vsT18
chr13:31942536-31942537	cg27506020	0.801488	19.6415	1.42624e-05	0.0242777	0	0	.		T0_vsT18
chr16:89883185-89883186	cg07648498	0.0678556	19.6498	1.42053e-05	0.0242777	0	0	FANCA,SPIRE2	60,82	T0_vsT18
chr2:232329264-232329265	cg08326301	0.0278587	19.6202	1.441e-05	0.0243529	0	0	NCL	41	T0_vsT18
chr9:33025487-33025488	cg14288209	0.0352559	19.6055	1.45127e-05	0.0244784	0	0	APTX,DNAJA1	41,18	T0_vsT18
chr11:43603991-43603992	cg16389399	0.508021	19.594	1.45942e-05	0.0245407	0	0	HSD17B12	129	T0_vsT18
chr13:92374741-92374742	cg09492247	0.0731638	19.5922	1.46067e-05	0.0245407	0	0	GPC5	96	T0_vsT18
chr1:155658841-155658842	cg13245071	0.0403573	19.5699	1.47651e-05	0.0246902	0	0	YY1AP1,DAP3,MSTO1,MSTO2P	35,40,90,90	T0_vsT18
chr6:109156575-109156576	cg25933178	0.0710675	19.5646	1.48027e-05	0.0246902	0	0	.		T0_vsT18
chr10:181263-181264	cg01750658	0.0578604	19.5635	1.48105e-05	0.0246902	0	0	ZMYND11	69	T0_vsT18
chr19:19754555-19754556	cg03672602	0.0587097	19.5728	1.47446e-05	0.0246902	0	0	GMIP	28	T0_vsT18
chr15:89738582-89738583	cg00521170	0.908793	19.5537	1.48808e-05	0.0247593	0	0	ABHD2	71	T0_vsT18
chr1:150337482-150337483	cg07066868	0.0774124	19.5439	1.49516e-05	0.0248291	0	0	RPRD2	37	T0_vsT18
chr1:151931590-151931591	cg18469231	0.508393	19.5074	1.52179e-05	0.0250777	0	0	.		T0_vsT18
chr3:14989951-14989952	cg21900878	0.0794544	19.5087	1.52085e-05	0.0250777	0	0	FGD5-AS1,NR2C2	27,55	T0_vsT18
chr17:19265939-19265940	cg18087791	0.0361405	19.5103	1.51964e-05	0.0250777	0	0	B9D1	65	T0_vsT18
chr17:63556608-63556609	cg11316592	0.0540101	19.5173	1.5145e-05	0.0250777	0	0	AXIN2,CTD-2535L24.2	42,54	T0_vsT18
chr16:68057128-68057129	cg05567709	0.053049	19.4902	1.5345e-05	0.0252388	0	0	DDX28,DUS2	27,90	T0_vsT18
chr7:5530946-5530947	cg03378525	0.862623	19.4784	1.54327e-05	0.0253346	0	0	FBXL18	104	T0_vsT18
chr13:42846648-42846649	cg08791849	0.0889949	19.4647	1.55356e-05	0.025455	0	0	AKAP11	22	T0_vsT18
chr10:127586917-127586918	cg02798486	0.752417	19.4482	1.56599e-05	0.0256099	0	0	FANK1	64	T0_vsT18
chr3:49936013-49936014	cg13551591	0.74771	19.4415	1.57107e-05	0.0256442	0	0	MST1R,CTD-2330K9.2	34,15	T0_vsT18
chr4:2845573-2845574	cg13110046	0.0514025	19.4224	1.58568e-05	0.0256877	0	0	ADD1	60	T0_vsT18
chr6:79564022-79564023	ch.6.79620741R	0.0843408	19.427	1.58216e-05	0.0256877	0	1	.		T0_vsT18
chr6:134496004-134496005	cg01059669	0.0321431	19.4305	1.57949e-05	0.0256877	0	0	SGK1	89	T0_vsT18
chr17:57408941-57408942	cg01658670	0.0651389	19.4234	1.5849e-05	0.0256877	0	0	YPEL2	36	T0_vsT18
chr8:145202751-145202752	cg25593776	0.0587497	19.4103	1.59497e-05	0.0257492	0	1	MROH1	55	T0_vsT18
chr11:64546383-64546384	cg14988347	0.0891662	19.4074	1.59721e-05	0.0257492	0	0	AP001462.6,SF1	19,41	T0_vsT18
chr17:74733464-74733465	cg03570858	0.0399497	19.4058	1.59846e-05	0.0257492	0	0	RP11-318A15.7,SRSF2,MIR636,MFSD11	28,27,20,36	T0_vsT18
chr6:31671213-31671214	cg05785394	0.0951761	19.3926	1.60871e-05	0.0258659	0	0	ABHD16A,XXbac-BPG32J3.20	69,93	T0_vsT18
chr1:92351047-92351048	cg16382382	0.0918709	19.3706	1.62593e-05	0.0260455	0	0	TGFBR3	96	T0_vsT18
chr8:89339609-89339610	cg02889488	0.253942	19.3732	1.62393e-05	0.0260455	0	0	RP11-586K2.1,MMP16	37,42	T0_vsT18
chr9:36487138-36487139	cg22952469	0.0356637	19.353	1.63983e-05	0.0260926	0	0	RNF38	34	T0_vsT18
chr12:113825199-113825200	cg07437202	0.820015	19.3477	1.64404e-05	0.0260926	0	0	PLBD2	31	T0_vsT18
chr14:91708477-91708478	cg13057731	0.0878388	19.3519	1.6407e-05	0.0260926	0	0	CTD-2547L24.3,GPR68	14,36	T0_vsT18
chr16:30773660-30773661	cg26055894	0.0438285	19.3516	1.64097e-05	0.0260926	0	0	C16orf93,RNF40	34,52	T0_vsT18
chr19:37663395-37663396	cg04053763	0.180155	19.3483	1.64359e-05	0.0260926	0	1	CTC-454I21.3,ZNF585A	38,22	T0_vsT18
chr10:97321106-97321107	cg21235838	0.0403535	19.3379	1.65186e-05	0.0261684	0	0	SORBS1	121	T0_vsT18
chr1:154531432-154531433	cg11219407	0.0267098	19.2903	1.69043e-05	0.0266812	0	0	UBE2Q1	29	T0_vsT18
chr7:157129669-157129670	cg00553120	0.0476079	19.2916	1.68935e-05	0.0266812	0	0	DNAJB6	110	T0_vsT18
chr1:27719043-27719044	cg14004477	0.0423442	19.2777	1.70074e-05	0.0267565	0	0	GPR3	12	T0_vsT18
chr6:90529562-90529563	cg03720838	0.0550244	19.2755	1.70259e-05	0.0267565	0	0	MDN1	41	T0_vsT18
chr22:42017243-42017244	cg11535522	0.1219	19.2731	1.70453e-05	0.0267565	0	0	DESI1,XRCC6	35,38	T0_vsT18
chr20:49575105-49575106	cg13216351	0.0921731	19.2552	1.71938e-05	0.0269404	0	0	MOCS3,DPM1	21,21	T0_vsT18
chr6:30614788-30614789	cg13583911	0.0797059	19.2436	1.72906e-05	0.0270429	0	0	C6orf136	60	T0_vsT18
chr9:139844321-139844322	cg14148609	0.11064	19.2307	1.73996e-05	0.0271186	0	0	LCN12	11	T0_vsT18
chr11:12030268-12030269	cg04100696	0.132786	19.2304	1.74021e-05	0.0271186	0	0	DKK3	55	T0_vsT18
chr1:3448190-3448191	cg06577272	0.0849542	19.1941	1.77109e-05	0.0272429	0	0	MEGF6	157	T0_vsT18
chr2:85555559-85555560	cg26316101	0.0813541	19.2127	1.75514e-05	0.0272429	0	0	TGOLN2	22	T0_vsT18
chr2:144239019-144239020	cg24829888	0.78913	19.1876	1.77669e-05	0.0272429	0	0	ARHGAP15,AC096558.1,RP11-570L15.2	127,20,33	T0_vsT18
chr3:51534000-51534001	cg04571742	0.0580318	19.2073	1.75981e-05	0.0272429	0	0	VPRBP	26	T0_vsT18
chr6:155636253-155636254	cg20478181	0.098227	19.1899	1.77467e-05	0.0272429	0	0	TFB1M	35	T0_vsT18
chr7:72722923-72722924	cg09232499	0.0540847	19.2027	1.76373e-05	0.0272429	0	1	NSUN5	21	T0_vsT18
chr8:48873358-48873359	cg09303136	0.0325225	19.2042	1.76244e-05	0.0272429	0	0	PRKDC,MCM4	79,38	T0_vsT18
chr16:57570280-57570281	cg26352374	0.0447002	19.1899	1.77467e-05	0.0272429	0	0	CCDC102A	30	T0_vsT18
chr21:38445512-38445513	cg27081108	0.0298902	19.2015	1.76475e-05	0.0272429	0	0	PIGP,TTC3	24,59	T0_vsT18
chr4:83932227-83932228	cg00748821	0.0753812	19.1739	1.7885e-05	0.0273265	0	0	LIN54	44	T0_vsT18
chr17:79818808-79818809	cg01441593	0.0368541	19.174	1.78844e-05	0.0273265	0	0	P4HB	47	T0_vsT18
chr2:44509492-44509493	cg09959718	0.850769	19.1557	1.80429e-05	0.027519	0	0	SLC3A1	28	T0_vsT18
chr8:145582714-145582715	cg16050442	0.0708593	19.1517	1.80783e-05	0.0275241	0	0	SLC52A2,FBXL6	37,24	T0_vsT18
chr1:5811088-5811089	cg14107084	0.878639	19.1437	1.81489e-05	0.0275342	0	0	.		T0_vsT18
chr11:61129683-61129684	cg18322805	0.0375847	19.1458	1.81299e-05	0.0275342	0	0	CYB561A3,TMEM138	34,31	T0_vsT18
chr7:99950227-99950228	cg16957126	0.777375	19.1291	1.82773e-05	0.0276801	0	1	PVRIG2P,STAG3L5P-PVRIG2P-PILRB,PILRB	8,49,48	T0_vsT18
chr16:29624832-29624833	cg08956724	0.0440388	19.1174	1.83814e-05	0.0276961	0	1	SLC7A5P1	12	T0_vsT18
chr19:6773807-6773808	cg14524442	0.0744062	19.1205	1.83536e-05	0.0276961	0	0	VAV1	29	T0_vsT18
chr21:34119431-34119432	ch.21.377520F	0.0557921	19.1171	1.83844e-05	0.0276961	0	0	PAXBP1	29	T0_vsT18
chr19:12780550-12780551	cg19436403	0.0412141	19.1109	1.84395e-05	0.0277305	1	0	CTD-2192J16.24,WDR83,WDR83OS	42,45,22	T0_vsT18
chr16:81348548-81348549	cg24885211	0.0698493	19.1004	1.8534e-05	0.0278239	0	0	GAN	36	T0_vsT18
chr7:77649330-77649331	cg12025522	0.0455654	19.0964	1.85697e-05	0.027829	0	0	MAGI2	193	T0_vsT18
chr4:128886072-128886073	cg00818828	0.100751	19.0773	1.87421e-05	0.0279898	0	0	C4orf29,MFSD8	37,31	T0_vsT18
chr6:74230008-74230009	cg23873872	0.0344179	19.0808	1.87106e-05	0.0279898	0	0	EEF1A1	30	T0_vsT18
chr10:80827333-80827334	cg11504511	0.081545	19.0731	1.87807e-05	0.0279989	0	0	ZMIZ1,ZMIZ1-AS1	201,78	T0_vsT18
chr19:41196577-41196578	cg04170999	0.331156	19.0612	1.88891e-05	0.0281118	0	0	NUMBL	23	T0_vsT18
chr15:50647267-50647268	cg21595526	0.0632005	19.0429	1.90575e-05	0.0283134	0	0	GABPB1-AS1,GABPB1	30,41	T0_vsT18
chr5:130970833-130970834	cg18144860	0.0536025	19.0219	1.92527e-05	0.028554	0	0	RAPGEF6,CTC-432M15.3	58,92	T0_vsT18
chr3:48282816-48282817	cg25808101	0.043628	19.0071	1.93918e-05	0.0285794	0	0	ZNF589	38	T0_vsT18
chr5:56169159-56169160	cg05565579	0.410579	19.0024	1.94359e-05	0.0285794	0	0	MAP3K1	45	T0_vsT18
chr10:8277523-8277524	cg00017363	0.951007	19.0035	1.94251e-05	0.0285794	0	0	.		T0_vsT18
chr19:38865425-38865426	cg11712735	0.0299139	19.004	1.94206e-05	0.0285794	0	0	PSMD8	21	T0_vsT18
chr20:2489878-2489879	cg01658602	0.0363958	19.0032	1.9428e-05	0.0285794	0	0	RP4-734P14.4,ZNF343	40,39	T0_vsT18
chr5:179234187-179234188	cg01055191	0.0572811	18.9931	1.95242e-05	0.0286532	0	0	MGAT4B,SQSTM1	44,50	T0_vsT18
chr8:146012773-146012774	cg26483359	0.0674906	18.99	1.95527e-05	0.0286532	0	0	ZNF34	18	T0_vsT18
chr2:241508479-241508480	cg18795575	0.0667644	18.986	1.95915e-05	0.0286612	0	0	RNPEPL1,ANKMY1	38,89	T0_vsT18
chr2:101869349-101869350	cg22016434	0.0287227	18.9636	1.98056e-05	0.0289252	0	0	CNOT11,TBC1D8	19104	T0_vsT18
chr9:6758071-6758072	cg19384852	0.0322993	18.9354	2.00782e-05	0.0292737	0	0	KDM4C	82	T0_vsT18
chr9:140008995-140008996	cg22419075	0.119606	18.9239	2.01909e-05	0.0293882	0	0	DPP7	15	T0_vsT18
chr17:41446203-41446204	cg24607181	0.0885031	18.9189	2.02397e-05	0.0294095	0	0	.		T0_vsT18
chr9:131870304-131870305	cg14214914	0.894949	18.9147	2.02811e-05	0.0294199	0	0	AL158151.2,CRAT	1,31	T0_vsT18
chr17:46659993-46659994	cg21082028	0.650974	18.9034	2.03921e-05	0.0294815	0	0	MIR10A,HOXB3,HOXB-AS3	19208210	T0_vsT18
chr19:1592895-1592896	cg22069171	0.0883379	18.905	2.03767e-05	0.0294815	0	0	MBD3,UQCR11	35,18	T0_vsT18
chr15:42264839-42264840	cg08876490	0.0405834	18.8958	2.04678e-05	0.0295413	0	0	CTD-2382E5.1,EHD4	24,59	T0_vsT18
chr8:28259708-28259709	cg14554372	0.0592499	18.8861	2.05645e-05	0.0295816	0	0	ZNF395,FBXO16	58112	T0_vsT18
chr10:70716161-70716162	cg00270594	0.0776529	18.8885	2.05407e-05	0.0295816	0	0	DDX21	25	T0_vsT18
chr4:7069733-7069734	cg13564595	0.0540007	18.8821	2.06046e-05	0.0295898	0	0	GRPEL1	22	T0_vsT18
chr1:16085148-16085149	cg04897742	0.065376	18.8748	2.06774e-05	0.029633	0	0	FBLIM1	44	T0_vsT18
chr3:42623557-42623558	cg04802248	0.0590533	18.8722	2.07036e-05	0.029633	0	0	SS18L2,SEC22C	30,62	T0_vsT18
chr2:73298974-73298975	cg18358762	0.03698	18.8583	2.08439e-05	0.0297349	0	0	SFXN5	66	T0_vsT18
chr20:10626720-10626721	ch.20.234237F	0.0816958	18.8601	2.08255e-05	0.0297349	0	0	JAG1,JAG1	7,7	T0_vsT18
chr3:125980095-125980096	cg16945415	0.328557	18.8541	2.08863e-05	0.029746	0	0	.		T0_vsT18
chr1:28832383-28832384	cg18214146	0.116922	18.8229	2.12056e-05	0.0298317	0	0	RCC1,SNHG3	61,28	T0_vsT18
chr2:200326721-200326722	cg20785796	0.563634	18.8212	2.12225e-05	0.0298317	0	0	SATB2-AS1,SATB2	78111	T0_vsT18
chr5:80597509-80597510	cg17477893	0.0446872	18.8393	2.10371e-05	0.0298317	0	0	ZCCHC9,CKMT2-AS1	23,58	T0_vsT18
chr7:1034912-1034913	cg12442385	0.904428	18.8256	2.11778e-05	0.0298317	0	0	.		T0_vsT18
chr9:132565414-132565415	cg25006128	0.097505	18.8242	2.11923e-05	0.0298317	0	0	TOR1B	15	T0_vsT18
chr11:94706000-94706001	cg02648738	0.0602546	18.8251	2.11825e-05	0.0298317	0	0	CWC15,KDM4D	22,26	T0_vsT18
chr16:75498491-75498492	cg17178940	0.0447032	18.8263	2.11701e-05	0.0298317	0	0	RP11-77K12.1,TMEM170A	40,21	T0_vsT18
chr17:25622067-25622068	cg07861658	0.0815277	18.8211	2.12239e-05	0.0298317	0	0	MIR4522,WSB1	13,19	T0_vsT18
chr1:19955786-19955787	cg22442883	0.906048	18.8079	2.13609e-05	0.0299521	1	0	MINOS1-NBL1,MINOS1	70,26	T0_vsT18
chr19:58365613-58365614	ch.19.1906967F	0.0714669	18.8061	2.13792e-05	0.0299521	0	1	CTD-2583A14.10,ZNF587B,ZNF814,ZNF587	38,38,38,18	T0_vsT18
chr3:53164619-53164620	cg00115629	0.0745774	18.7863	2.15856e-05	0.0300436	0	0	RFT1	23	T0_vsT18
chr9:86587059-86587060	cg24309905	0.548142	18.7838	2.16124e-05	0.0300436	0	1	HNRNPK,RP11-575L7.8	26,6	T0_vsT18
chr9:131799210-131799211	cg01241301	0.115833	18.7798	2.1654e-05	0.0300436	0	0	FAM73B	27	T0_vsT18
chr11:62644905-62644906	cg01077822	0.923759	18.7918	2.15281e-05	0.0300436	0	0	SLC3A2	58	T0_vsT18
chr16:3074059-3074060	cg22417159	0.0565711	18.7865	2.1584e-05	0.0300436	0	0	HCFC1R1,THOC6	22,23	T0_vsT18
chr16:11498716-11498717	cg17111463	0.9093	18.7804	2.16482e-05	0.0300436	0	0	CTD-3088G3.8	102	T0_vsT18
chr10:44144311-44144312	cg17895310	0.0316107	18.7523	2.19458e-05	0.0303994	0	0	ZNF32,ZNF32-AS3	21,46	T0_vsT18
chr19:58898687-58898688	cg08216447	0.0943605	18.7225	2.22652e-05	0.0307922	0	1	MIR4754,RPS5	9,16	T0_vsT18
chr10:98945795-98945796	cg23316818	0.164441	18.7115	2.23845e-05	0.0309075	0	0	ARHGAP19-SLIT1,SLIT1	144106	T0_vsT18
chr1:167906350-167906351	cg02970394	0.125142	18.6983	2.25285e-05	0.0310565	0	0	MPC2,DCAF6	28,46	T0_vsT18
chr19:49588594-49588595	cg14168375	0.0499571	18.6889	2.26321e-05	0.0311494	0	0	SNRNP70	24	T0_vsT18
chr9:130953725-130953726	cg00996083	0.0941841	18.6806	2.27231e-05	0.0312247	0	0	CIZ1	42	T0_vsT18
chr2:70475998-70475999	cg23081331	0.0450656	18.676	2.27741e-05	0.0312448	0	0	TIA1,C2orf42	23,51	T0_vsT18
chr8:22876908-22876909	cg16263403	0.0697662	18.6431	2.31414e-05	0.0315179	0	0	RP11-875O11.1,RHOBTB2	53,51	T0_vsT18
chr11:88071409-88071410	cg12391538	0.0429469	18.6426	2.31479e-05	0.0315179	0	0	CTSC	23	T0_vsT18
chr15:96875703-96875704	cg09738906	0.420454	18.6544	2.30153e-05	0.0315179	0	1	MIR1469,NR2F2	17,64	T0_vsT18
chr16:69373237-69373238	cg19710653	0.0496264	18.6359	2.32232e-05	0.0315179	0	0	NIP7,COG8,RP11-343C2.9,RP11-343C2.7	24,58,46,39	T0_vsT18
chr16:90072702-90072703	cg02191970	0.836608	18.6353	2.32296e-05	0.0315179	0	0	DBNDD1	30	T0_vsT18
chr17:29151753-29151754	cg02358245	0.0709384	18.6386	2.31925e-05	0.0315179	0	0	CRLF3	20	T0_vsT18
chr17:78428562-78428563	cg15372773	0.0391381	18.6398	2.3179e-05	0.0315179	0	0	CTD-2526A2.2	9	T0_vsT18
chr8:41908569-41908570	cg16743070	0.0887209	18.6145	2.34658e-05	0.0316884	0	0	KAT6A	42	T0_vsT18
chr15:95398723-95398724	cg19109583	0.670911	18.6166	2.34422e-05	0.0316884	1	1	CTD-2576F9.1	13	T0_vsT18
chr16:81682598-81682599	cg09812467	0.308491	18.6148	2.34628e-05	0.0316884	0	0	CMIP	228	T0_vsT18
chr6:31927018-31927019	cg00144161	0.0711447	18.6042	2.35837e-05	0.0317977	0	0	NELFE,SKIV2L	51,81	T0_vsT18
chr9:75828313-75828314	ch.9.75018133F	0.0469977	18.5961	2.36764e-05	0.0318727	0	0	.		T0_vsT18
chr13:114898515-114898516	cg27632050	0.114658	18.5688	2.39932e-05	0.0322487	0	0	RASA3	362	T0_vsT18
chr6:82462656-82462657	cg25373372	0.176986	18.5638	2.40519e-05	0.0322772	0	0	FAM46A	47	T0_vsT18
chr1:205180527-205180528	cg13197680	0.0282004	18.5604	2.40919e-05	0.0322805	0	0	DSTYK	31	T0_vsT18
chr2:28646937-28646938	cg24882288	0.0863768	18.5345	2.4397e-05	0.0322886	1	0	.		T0_vsT18
chr2:96971379-96971380	cg14860182	0.030846	18.5262	2.44952e-05	0.0322886	0	0	SNRNP200	42	T0_vsT18
chr3:19988887-19988888	cg17138393	0.0368196	18.5327	2.44187e-05	0.0322886	0	0	RAB5A,EFHB	23,35	T0_vsT18
chr3:57583280-57583281	cg08957289	0.0623182	18.5374	2.4363e-05	0.0322886	0	0	RP11-755B10.4,ARF4	16,20	T0_vsT18
chr4:670828-670829	cg20372032	0.694355	18.5263	2.44943e-05	0.0322886	0	0	MYL5	38	T0_vsT18
chr4:1638210-1638211	cg11391431	0.820892	18.5365	2.43733e-05	0.0322886	0	0	FAM53A	86	T0_vsT18
chr8:38089439-38089440	cg19719838	0.0481	18.5495	2.42197e-05	0.0322886	0	0	DDHD2	58	T0_vsT18
chr11:17099361-17099362	cg19057041	0.0384319	18.5249	2.45109e-05	0.0322886	0	0	RPS13,PIK3C2A	21,40	T0_vsT18
chr11:64684725-64684726	cg00213905	0.0749442	18.5447	2.4276e-05	0.0322886	1	0	ATG2A,PPP2R5B	34,32	T0_vsT18
chr11:124981664-124981665	cg09410014	0.106464	18.5405	2.43256e-05	0.0322886	0	0	TMEM218,KRT18P59	30,18	T0_vsT18
chr22:38902550-38902551	cg20012172	0.0776183	18.5495	2.42194e-05	0.0322886	0	0	DDX17	35	T0_vsT18
chr19:8478158-8478159	cg07847428	0.0437814	18.5195	2.45753e-05	0.032324	0	0	MARCH2	28	T0_vsT18
chr17:59199563-59199564	cg07236524	0.9254	18.5142	2.46397e-05	0.0323592	0	0	BCAS3	147	T0_vsT18
chr17:73996906-73996907	cg09401340	0.84761	18.4905	2.49252e-05	0.0326843	0	0	CDK3,TEN1-CDK3	15,39	T0_vsT18
chr11:507006-507007	cg23369017	0.0335558	18.4848	2.49942e-05	0.0327249	0	0	RNH1	51	T0_vsT18
chr10:120840120-120840121	cg23644879	0.0434131	18.459	2.53098e-05	0.0330471	0	0	EIF3A	34	T0_vsT18
chr17:79633652-79633653	cg22471020	0.0695883	18.4584	2.53171e-05	0.0330471	0	0	OXLD1,CCDC137	25,31	T0_vsT18
chr22:50984822-50984823	cg14496081	0.748354	18.4534	2.53788e-05	0.0330775	0	0	CTA-384D8.31	12	T0_vsT18
chr1:155532463-155532464	cg11439050	0.123058	18.4357	2.5599e-05	0.033105	0	1	ASH1L-AS1,ASH1L	17,62	T0_vsT18
chr3:108308533-108308534	cg14787155	0.495398	18.4308	2.566e-05	0.033105	0	0	KIAA1524,DZIP3	35,33	T0_vsT18
chr10:114591733-114591734	cg02571204	0.90256	18.4322	2.56429e-05	0.033105	0	0	.		T0_vsT18
chr11:123301758-123301759	cg13921910	0.0341258	18.4468	2.54611e-05	0.033105	0	0	AP000783.1	16	T0_vsT18
chr12:56552012-56552013	cg15489449	0.0500131	18.445	2.54834e-05	0.033105	0	0	RP11-603J24.14,MYL6B,MYL6	40,40,24	T0_vsT18
chr15:66679094-66679095	cg07017800	0.0571269	18.4377	2.55738e-05	0.033105	0	0	TIPIN,MAP2K1	35,41	T0_vsT18
chr16:67261081-67261082	cg27651003	0.100829	18.4301	2.56694e-05	0.033105	0	0	TMEM208,LRRC29,AC040160.1	22,31,29	T0_vsT18
chr9:131038455-131038456	cg08882985	0.0425585	18.4235	2.57512e-05	0.0331113	0	1	GOLGA2,SWI5	20,12	T0_vsT18
chr22:24181428-24181429	cg06723553	0.101596	18.4252	2.573e-05	0.0331113	0	0	DERL3	18	T0_vsT18
chr7:99097871-99097872	cg01391867	0.104588	18.4182	2.58182e-05	0.0331478	0	0	ZNF789,ZNF394	49,21	T0_vsT18
chr13:73633178-73633179	cg00252332	0.0285943	18.4129	2.58847e-05	0.0331837	0	0	KLF5	32	T0_vsT18
chr17:1843473-1843474	cg04110718	0.824155	18.407	2.59587e-05	0.033229	0	0	RTN4RL1	93	T0_vsT18
chr22:42084837-42084838	cg05827267	0.0635568	18.4016	2.60281e-05	0.0332684	0	0	C22orf46,NHP2L1	21,35	T0_vsT18
chr4:39978799-39978800	cg15003695	0.119762	18.3936	2.61289e-05	0.0333477	0	0	PDS5A	35	T0_vsT18
chr1:227923227-227923228	cg15803895	0.0591216	18.3741	2.63782e-05	0.0335167	0	0	JMJD4,SNAP47	23,81	T0_vsT18
chr3:37284583-37284584	cg17631042	0.0354912	18.3757	2.63578e-05	0.0335167	0	0	RP11-259K5.2,AC097359.1,GOLGA4	15,15,36	T0_vsT18
chr6:31671215-31671216	cg02720683	0.0687889	18.3788	2.63187e-05	0.0335167	0	0	ABHD16A,XXbac-BPG32J3.20	69,93	T0_vsT18
chr1:91966518-91966519	cg07353572	0.0401228	18.3321	2.69242e-05	0.03416	0	0	CDC7	26	T0_vsT18
chr2:70781101-70781102	cg14784608	0.0418274	18.3223	2.70531e-05	0.0342543	0	0	TGFA	43	T0_vsT18
chr19:56147306-56147307	cg23994468	0.613966	18.3204	2.70782e-05	0.0342543	0	0	ZNF580,ZNF581	24,33	T0_vsT18
chr11:64948989-64948990	cg04526020	0.139295	18.3156	2.71416e-05	0.0342711	0	0	AP003068.23,CAPN1	24,45	T0_vsT18
chr12:30848710-30848711	cg25943131	0.130004	18.3133	2.71711e-05	0.0342711	0	0	IPO8	24	T0_vsT18
chr1:26560674-26560675	cg10539565	0.0405085	18.2984	2.73696e-05	0.034362	0	0	CEP85	28	T0_vsT18
chr1:27719045-27719046	cg06057576	0.0330661	18.2747	2.76874e-05	0.034362	0	0	GPR3	12	T0_vsT18
chr1:232878876-232878877	cg16585693	0.826479	18.2615	2.78665e-05	0.034362	0	0	RP11-66A2.2	2	T0_vsT18
chr4:668276-668277	cg10635789	0.045039	18.2574	2.79223e-05	0.034362	0	0	ATP5I,MYL5	24,38	T0_vsT18
chr6:26313412-26313413	cg00356774	0.087983	18.2694	2.77587e-05	0.034362	0	0	.		T0_vsT18
chr6:146245204-146245205	cg03663538	0.842649	18.258	2.79136e-05	0.034362	0	0	SHPRH	33	T0_vsT18
chr9:99616510-99616511	cg22267633	0.068685	18.2794	2.76246e-05	0.034362	1	0	ZNF782	29	T0_vsT18
chr10:93692031-93692032	cg13314563	0.943855	18.2755	2.76771e-05	0.034362	0	0	BTAF1	36	T0_vsT18
chr12:5570828-5570829	ch.12.158852F	0.0560343	18.2871	2.75203e-05	0.034362	0	0	NTF3	72	T0_vsT18
chr12:6809887-6809888	cg04723113	0.0605876	18.2613	2.78693e-05	0.034362	0	0	PIANP	23	T0_vsT18
chr12:42538806-42538807	cg00106074	0.0529289	18.2924	2.74502e-05	0.034362	0	0	GXYLT1	25	T0_vsT18
chr12:133526522-133526523	cg18754747	0.92788	18.2707	2.77408e-05	0.034362	0	1	ZNF605,CHFR	33196	T0_vsT18
chr14:36983694-36983695	cg04330513	0.504148	18.2979	2.73759e-05	0.034362	0	0	RP11-896J10.3,SFTA3	70,40	T0_vsT18
chr17:27945244-27945245	cg06283673	0.0377029	18.2645	2.78258e-05	0.034362	0	0	CORO6,RP11-68I3.2	27141	T0_vsT18
chr17:42094475-42094476	cg04482971	0.74517	18.3027	2.73116e-05	0.034362	0	1	TMEM101	28	T0_vsT18
chr19:2611314-2611315	cg21943841	0.0473938	18.2594	2.78942e-05	0.034362	0	0	CTC-265F19.2,GNG7	6200	T0_vsT18
chr19:47232443-47232444	cg10695145	0.821212	18.2846	2.75545e-05	0.034362	0	0	STRN4,CTB-174O21.2	37,5	T0_vsT18
chr14:74551108-74551109	cg16089443	0.12094	18.2499	2.80239e-05	0.0344378	0	0	ALDH6A1,LIN52	25,27	T0_vsT18
chr1:145549203-145549204	cg20525831	0.0507596	18.237	2.82012e-05	0.0346062	0	0	ANKRD35	19	T0_vsT18
chr11:67250445-67250446	cg09933726	0.0662411	18.2259	2.83543e-05	0.0347353	0	0	AIP	23	T0_vsT18
chr14:35520034-35520035	cg10141794	0.253981	18.2235	2.83871e-05	0.0347353	0	0	FAM177A1	31	T0_vsT18
chr1:241683161-241683162	cg06951363	0.0553803	18.213	2.85328e-05	0.0347651	0	0	FH	19	T0_vsT18
chr11:66886253-66886254	cg05295919	0.0756726	18.2156	2.84966e-05	0.0347651	0	0	KDM2A	68	T0_vsT18
chr20:31331290-31331291	cg18501615	0.0740633	18.2149	2.85057e-05	0.0347651	0	0	COMMD7	24	T0_vsT18
chr17:55333738-55333739	cg00460684	0.0274279	18.209	2.85888e-05	0.0347841	0	0	MSI2	213	T0_vsT18
chr2:28113654-28113655	cg14001360	0.0695025	18.2001	2.87125e-05	0.0348431	0	0	MRPL33,RBKS,BRE	84,43,123	T0_vsT18
chr4:111560462-111560463	cg16041686	0.358907	18.1968	2.87594e-05	0.0348431	0	0	PITX2	83	T0_vsT18
chr14:68683006-68683007	cg00190881	0.848583	18.1939	2.87993e-05	0.0348431	1	0	RAD51B	338	T0_vsT18
chr14:69446214-69446215	cg06268174	0.0535975	18.1943	2.87944e-05	0.0348431	0	0	ACTN1,ACTN1-AS1	95,23	T0_vsT18
chr1:21396338-21396339	cg08539965	0.431443	18.1531	2.93779e-05	0.0349135	0	0	EIF4G3	85	T0_vsT18
chr1:24969146-24969147	cg16031878	0.0688888	18.1647	2.92132e-05	0.0349135	0	0	SRRM1	38	T0_vsT18
chr3:35433639-35433640	ch.3.35408643R	0.170377	18.14	2.95663e-05	0.0349135	0	0	.		T0_vsT18
chr3:52232234-52232235	cg22534599	0.0285543	18.1763	2.90479e-05	0.0349135	0	0	ALAS1	21	T0_vsT18
chr6:10632714-10632715	cg20421777	0.858127	18.1427	2.95274e-05	0.0349135	0	0	GCNT6	8	T0_vsT18
chr6:31782997-31782998	cg15185479	0.0794117	18.1543	2.93613e-05	0.0349135	0	0	HSPA1L,HSPA1A	72,35	T0_vsT18
chr7:40575355-40575356	cg05344902	0.765184	18.1417	2.95419e-05	0.0349135	0	0	C7orf10	100	T0_vsT18
chr7:141374987-141374988	cg05292864	0.776053	18.1362	2.9622e-05	0.0349135	0	0	KIAA1147	27	T0_vsT18
chr11:62308810-62308811	cg06219806	0.67772	18.1437	2.95131e-05	0.0349135	0	0	RP11-864I4.3,AHNAK	12,94	T0_vsT18
chr12:64233930-64233931	cg25022612	0.898799	18.1504	2.9417e-05	0.0349135	0	0	.		T0_vsT18
chr12:103350742-103350743	cg08927739	0.315541	18.1357	2.96286e-05	0.0349135	0	0	ASCL1,PAH	21,55	T0_vsT18
chr12:122018375-122018376	cg21781916	0.0679725	18.1838	2.89414e-05	0.0349135	0	0	KDM2B,RP13-941N14.1	135,31	T0_vsT18
chr15:80215805-80215806	cg19392911	0.0540489	18.1358	2.96276e-05	0.0349135	0	0	ST20-MTHFS,ST20,C15orf37,C15ORF37	70,41,24,23	T0_vsT18
chr16:68538032-68538033	cg03996658	0.84826	18.1514	2.94035e-05	0.0349135	0	0	.		T0_vsT18
chr18:72513370-72513371	cg17266622	0.927013	18.1655	2.9202e-05	0.0349135	0	0	ZNF407	122	T0_vsT18
chr19:17356129-17356130	cg06214754	0.125649	18.1658	2.91965e-05	0.0349135	0	0	NR2F6,AC010646.3	20,19	T0_vsT18
chr19:39647964-39647965	cg07432658	0.851469	18.1833	2.89488e-05	0.0349135	0	0	PAK4	52	T0_vsT18
chr19:48867481-48867482	cg13513270	0.0319759	18.1494	2.94313e-05	0.0349135	0	0	TMEM143,SYNGR4	29,18	T0_vsT18
chr22:40784715-40784716	cg04799831	0.762005	18.143	2.95242e-05	0.0349135	0	0	SGSM3,RP5-1042K10.10,ADSL	46,12,55	T0_vsT18
chr1:116519046-116519047	cg16631774	0.0800517	18.1321	2.96808e-05	0.0349271	0	0	SLC22A15	27	T0_vsT18
chr8:99129483-99129484	cg05999191	0.0359936	18.1119	2.99748e-05	0.0352129	0	0	HRSP12,POP1	22,23	T0_vsT18
chr9:37198529-37198530	cg06334467	0.401599	18.1042	3.00874e-05	0.0352129	0	0	ZCCHC7	65	T0_vsT18
chr19:10450364-10450365	cg06855803	0.0805867	18.108	3.00324e-05	0.0352129	0	0	ICAM3	20	T0_vsT18
chr19:46149243-46149244	cg07379480	0.0641692	18.106	3.00617e-05	0.0352129	0	0	EML2	61	T0_vsT18
chr7:44924598-44924599	cg09928203	0.0276583	18.0949	3.02252e-05	0.0353261	0	0	PURB,RP4-673M15.1	16,12	T0_vsT18
chr1:180199305-180199306	cg04808988	0.0623653	18.0892	3.03083e-05	0.0353272	0	0	LHX4	67	T0_vsT18
chr7:105029499-105029500	cg06081153	0.0902654	18.0906	3.02879e-05	0.0353272	0	0	SRPK2	105	T0_vsT18
chr12:109915162-109915163	cg09454237	0.0724357	18.0791	3.04588e-05	0.0354546	0	0	KCTD10,UBE3B	52,53	T0_vsT18
chr16:730130-730131	cg01352882	0.0883798	18.0723	3.05594e-05	0.0355236	0	0	LA16c-313D11.9,STUB1	18,30	T0_vsT18
chr15:41624774-41624775	cg25217313	0.115201	18.0663	3.06492e-05	0.03558	0	0	OIP5,NUSAP1	21,35	T0_vsT18
chr15:69113128-69113129	cg24120822	0.0725145	18.0627	3.07027e-05	0.035594	0	1	ANP32A,SPESP1	52,54	T0_vsT18
chr19:10654420-10654421	cg07962463	0.0590222	18.059	3.07582e-05	0.0356104	0	0	ATG4D	26	T0_vsT18
chr17:20947103-20947104	cg06218113	0.117408	18.0478	3.09267e-05	0.0357573	0	0	USP22	39	T0_vsT18
chr8:74884507-74884508	cg00033457	0.0466996	18.0443	3.09798e-05	0.0357668	0	0	TCEB1,TMEM70	25,37	T0_vsT18
chr16:88387006-88387007	cg02778392	0.754775	18.0418	3.1018e-05	0.0357668	0	0	.		T0_vsT18
chr9:125027073-125027074	cg13611226	0.0328115	18.0357	3.11104e-05	0.0358252	0	0	RBM18,MRRF	26,30	T0_vsT18
chr10:99400468-99400469	cg24343515	0.0551661	18.015	3.1427e-05	0.0360451	0	0	PI4K2A,PI4K2A	69,69	T0_vsT18
chr15:77197883-77197884	cg16553447	0.0381154	18.0162	3.14085e-05	0.0360451	0	0	SCAPER	61	T0_vsT18
chr19:11456894-11456895	cg25420298	0.302253	18.0198	3.13523e-05	0.0360451	0	1	TMEM205,CCDC159,RAB3D	19,25,33	T0_vsT18
chr1:38512238-38512239	cg05336094	0.0528706	17.9945	3.17427e-05	0.0362581	0	0	POU3F1,RP5-884C9.2	18,50	T0_vsT18
chr2:29093371-29093372	cg24278961	0.0329044	17.9839	3.19077e-05	0.0362581	0	0	TRMT61B	17	T0_vsT18
chr13:41796017-41796018	cg07619820	0.567558	17.9974	3.16983e-05	0.0362581	0	0	MTRF1	19	T0_vsT18
chr15:41408316-41408317	cg21007089	0.0903456	17.9887	3.18325e-05	0.0362581	0	0	INO80	52	T0_vsT18
chr17:67542788-67542789	cg05508455	0.885745	17.9859	3.18769e-05	0.0362581	1	0	.		T0_vsT18
chr19:4268802-4268803	cg08173959	0.83024	17.9919	3.17824e-05	0.0362581	0	0	CCDC94	23	T0_vsT18
chr19:36705437-36705438	cg23268417	0.126984	17.9899	3.18136e-05	0.0362581	0	0	ZNF146,ZNF565	35,55	T0_vsT18
chr7:72298792-72298793	cg04778852	0.0504173	17.9626	3.22403e-05	0.0365876	0	0	SBDSP1,TYW1B	15,40	T0_vsT18
chr2:74154043-74154044	cg01788568	0.067605	17.9408	3.25857e-05	0.0367854	0	0	DGUOK	22	T0_vsT18
chr4:114528614-114528615	cg20703467	0.83052	17.9444	3.2529e-05	0.0367854	0	1	CAMK2D	68	T0_vsT18
chr5:137610255-137610256	cg23511432	0.0687953	17.9419	3.2568e-05	0.0367854	0	0	GFRA3	25	T0_vsT18
chr13:27746040-27746041	cg01517521	0.0663173	17.9422	3.25631e-05	0.0367854	0	0	USP12-AS2,USP12	16,39	T0_vsT18
chr1:242011447-242011448	cg21919602	0.0352856	17.9321	3.2725e-05	0.0368866	0	0	EXO1	29	T0_vsT18
chr3:112280678-112280679	cg19100453	0.0602712	17.927	3.28059e-05	0.0368866	0	0	ATG3,SLC35A5	27,26	T0_vsT18
chr8:42751758-42751759	cg19214487	0.090706	17.9222	3.2884e-05	0.0368866	0	0	MIR4469,RNF170,HOOK3	5,20,36	T0_vsT18
chr18:67955861-67955862	cg00474194	0.0771604	17.9191	3.29325e-05	0.0368866	0	0	SOCS6	21	T0_vsT18
chr20:35489181-35489182	cg16125816	0.882243	17.9223	3.2882e-05	0.0368866	0	0	SOGA1	86	T0_vsT18
chr20:62289557-62289558	cg24092470	0.182737	17.9208	3.2905e-05	0.0368866	0	0	RTEL1,RTEL1-TNFRSF6B	65,57	T0_vsT18
chr13:114824951-114824952	cg05304178	0.882433	17.9128	3.30339e-05	0.036904	0	0	RASA3	362	T0_vsT18
chr17:16318860-16318861	cg07368817	0.0814621	17.9152	3.29958e-05	0.036904	0	0	RP11-138I1.2,TRPV2	7,19	T0_vsT18
chr3:167434410-167434411	cg23960591	0.856803	17.8945	3.33308e-05	0.0371874	0	0	PDCD10	31	T0_vsT18
chr3:49449503-49449504	cg22907065	0.0434615	17.8907	3.33938e-05	0.0372095	0	0	TCTA,RHOA	24,40	T0_vsT18
chr16:11836787-11836788	cg12894781	0.0773986	17.8861	3.34686e-05	0.0372445	0	0	RP11-490O6.2,TXNDC11	20,44	T0_vsT18
chr5:41587931-41587932	cg27344430	0.939829	17.8792	3.35811e-05	0.0373215	0	0	CTD-2122P11.1	3	T0_vsT18
chr5:152870046-152870047	cg17166762	0.15795	17.8744	3.36607e-05	0.0373617	0	0	GRIA1	41	T0_vsT18
chr1:27667412-27667413	cg02052894	0.637376	17.8618	3.38676e-05	0.0373821	1	1	SYTL1	35	T0_vsT18
chr1:153970768-153970769	cg15596855	0.76375	17.8601	3.38964e-05	0.0373821	0	0	U3,NUP210L	2,32	T0_vsT18
chr11:64851499-64851500	cg20252016	0.0316125	17.8693	3.37439e-05	0.0373821	0	0	ZFPL1,CDCA5	23,34	T0_vsT18
chr19:47745582-47745583	cg06701796	0.715618	17.8661	3.37969e-05	0.0373821	0	0	.		T0_vsT18
chr20:34359908-34359909	cg01512265	0.137164	17.8604	3.3891e-05	0.0373821	0	0	PHF20	61	T0_vsT18
chr8:145580727-145580728	cg01646718	0.896155	17.8557	3.39684e-05	0.0374135	0	0	TMEM249,SLC52A2,FBXL6	20,37,24	T0_vsT18
chr1:207225656-207225657	cg16932062	0.853036	17.8489	3.40821e-05	0.0374907	0	0	YOD1,PFKFB2	35,52	T0_vsT18
chr3:49823707-49823708	cg16121576	0.0672145	17.8438	3.41666e-05	0.0375045	0	0	IP6K1	30	T0_vsT18
chr8:93156581-93156582	cg20603668	0.556067	17.8429	3.41818e-05	0.0375045	0	1	RP11-777J24.1	6	T0_vsT18
chr7:73082054-73082055	cg22469355	0.0781472	17.8343	3.43268e-05	0.0375842	0	0	VPS37D	16	T0_vsT18
chr13:96204860-96204861	cg16275739	0.152029	17.8334	3.43418e-05	0.0375842	0	0	CLDN10	73	T0_vsT18
chr2:203776981-203776982	cg12805593	0.0442806	17.8287	3.44201e-05	0.037622	0	0	WDR12,CARF	44,24	T0_vsT18
chr3:14219850-14219851	cg10626541	0.0332634	17.8247	3.44886e-05	0.0376344	0	0	XPC,LSM3	42,27	T0_vsT18
chr10:102756921-102756922	cg27255678	0.0673575	17.8205	3.45585e-05	0.0376344	0	0	LZTS2	44	T0_vsT18
chr19:14117082-14117083	cg05659223	0.0433631	17.8203	3.45627e-05	0.0376344	0	0	RFX1	47	T0_vsT18
chr17:37558667-37558668	cg13692196	0.0554829	17.8093	3.47477e-05	0.0377881	0	0	CTB-131K11.1,FBXL20	12,20	T0_vsT18
chr14:105635239-105635240	cg27656486	0.0499725	17.794	3.50096e-05	0.0380223	0	0	JAG2,RP11-44N21.4	50,45	T0_vsT18
chr20:3026576-3026577	cg17300311	0.0533374	17.7915	3.50515e-05	0.0380223	0	0	MRPS26	14	T0_vsT18
chr2:10443632-10443633	cg13154104	0.16833	17.7859	3.51473e-05	0.0380782	0	0	HPCAL1	114	T0_vsT18
chr9:140009395-140009396	cg23999861	0.0565222	17.7751	3.53338e-05	0.038184	0	0	DPP7	15	T0_vsT18
chr19:35633983-35633984	cg03472770	0.16332	17.776	3.53186e-05	0.038184	0	0	FXYD1,LGI4,CTD-2527I21.4,FXYD7	30,50,38,22	T0_vsT18
chr11:119020147-119020148	cg19844581	0.0489553	17.7649	3.55117e-05	0.0383281	0	0	ABCG4	30	T0_vsT18
chr22:21368659-21368660	cg09481857	0.0338178	17.7593	3.56081e-05	0.038384	0	0	TUBA3FP,P2RX6	19,25	T0_vsT18
chr4:26862197-26862198	cg20932348	0.0507231	17.7517	3.57405e-05	0.0384305	0	0	RP11-293A21.1,STIM2	15,49	T0_vsT18
chr19:18846606-18846607	cg12554922	0.748532	17.7536	3.57072e-05	0.0384305	0	0	CRTC1	76	T0_vsT18
chr22:30662874-30662875	cg10467217	0.0953642	17.7472	3.58189e-05	0.0384666	0	0	OSM	13	T0_vsT18
chr1:221924858-221924859	cg09341616	0.335402	17.726	3.6193e-05	0.0386635	0	0	.		T0_vsT18
chr2:74682101-74682102	cg10476260	0.10196	17.721	3.62819e-05	0.0386635	0	0	INO80B	31	T0_vsT18
chr2:139046331-139046332	cg06617629	0.534187	17.7284	3.61507e-05	0.0386635	0	1	AC097523.2	2	T0_vsT18
chr3:138553772-138553773	cg25043552	0.0565878	17.734	3.60508e-05	0.0386635	0	0	PIK3CB	46	T0_vsT18
chr6:150184969-150184970	cg07807409	0.0488378	17.719	3.63168e-05	0.0386635	0	0	LRP11,RP11-244K5.8	44,59	T0_vsT18
chr10:102792249-102792250	cg06154084	0.125938	17.7228	3.62495e-05	0.0386635	0	0	PDZD7,SFXN3	42,27	T0_vsT18
chr16:1876874-1876875	cg06782493	0.058754	17.7201	3.62971e-05	0.0386635	0	0	HAGH,FAHD1	45,29	T0_vsT18
chr17:80009856-80009857	cg16878652	0.0940949	17.7148	3.63922e-05	0.0386958	0	0	RFNG,GPS1	17,24	T0_vsT18
chr10:105881828-105881829	cg25347033	0.0319256	17.7093	3.64903e-05	0.0387522	0	0	SFR1	17	T0_vsT18
chr1:38070791-38070792	cg01185521	0.895161	17.6872	3.6886e-05	0.038931	0	0	.		T0_vsT18
chr1:245027772-245027773	cg00914462	0.0331853	17.6782	3.7049e-05	0.038931	0	0	RP11-11N7.4,HNRNPU	16,29	T0_vsT18
chr2:63281317-63281318	cg10859133	0.412689	17.6809	3.69994e-05	0.038931	0	0	OTX1	69	T0_vsT18
chr2:210867290-210867291	cg21656520	0.174033	17.6773	3.7066e-05	0.038931	0	0	RPE	17	T0_vsT18
chr3:119182523-119182524	cg25734825	0.0368046	17.6786	3.70412e-05	0.038931	0	0	TMEM39A	26	T0_vsT18
chr6:27513009-27513010	cg09411719	0.297473	17.6819	3.69812e-05	0.038931	0	1	.		T0_vsT18
chr17:40021711-40021712	cg02331583	0.0402432	17.6905	3.68263e-05	0.038931	0	0	KLHL11	17	T0_vsT18
chr19:15490619-15490620	cg22321522	0.0486819	17.6897	3.68417e-05	0.038931	0	0	AC005785.2,AKAP8	14,32	T0_vsT18
chr20:2188127-2188128	cg26056104	0.0667229	17.6959	3.67295e-05	0.038931	0	0	RP11-128M1.1	19	T0_vsT18
chr18:5237830-5237831	cg06700856	0.0604021	17.6742	3.71209e-05	0.0389411	0	0	RP11-835E18.5,LINC00526,LINC00667	12,11,15	T0_vsT18
chr1:6550674-6550675	cg20675044	0.0415315	17.6363	3.7817e-05	0.039084	0	0	PLEKHG5	103	T0_vsT18
chr1:28996131-28996132	cg09837361	0.0713366	17.6311	3.79124e-05	0.039084	0	0	GMEB1	25	T0_vsT18
chr1:202927798-202927799	cg02108436	0.0510738	17.6512	3.75426e-05	0.039084	0	0	ADIPOR1	27	T0_vsT18
chr2:85843380-85843381	cg09391128	0.0415594	17.6242	3.80418e-05	0.039084	0	0	USP39	63	T0_vsT18
chr5:3238566-3238567	ch.5.3291566R	0.087638	17.6224	3.80749e-05	0.039084	0	0	.		T0_vsT18
chr5:177548050-177548051	cg12526807	0.0699611	17.653	3.75088e-05	0.039084	0	0	N4BP3	24	T0_vsT18
chr6:44095565-44095566	cg08877093	0.0963624	17.648	3.75999e-05	0.039084	0	0	MRPL14,TMEM63B	25,40	T0_vsT18
chr7:960115-960116	cg18092351	0.912338	17.6348	3.78434e-05	0.039084	0	0	ADAP1,COX19	139189	T0_vsT18
chr7:72722925-72722926	cg21802401	0.0474671	17.6309	3.79158e-05	0.039084	0	1	NSUN5	21	T0_vsT18
chr8:95565789-95565790	cg03769349	0.034766	17.6548	3.74748e-05	0.039084	0	0	RP11-267M23.4,KIAA1429	17,29	T0_vsT18
chr11:73471504-73471505	cg13533999	0.0762138	17.6617	3.73489e-05	0.039084	0	0	RP11-707G14.1,RAB6A	9,28	T0_vsT18
chr13:45694609-45694610	cg04056025	0.0366333	17.6242	3.80409e-05	0.039084	0	0	GTF2F2	68	T0_vsT18
chr17:40897122-40897123	cg05979501	0.056569	17.6426	3.76998e-05	0.039084	0	0	EZH1	22	T0_vsT18
chr19:3659919-3659920	cg11452653	0.827502	17.6497	3.75692e-05	0.039084	0	0	PIP5K1C	91	T0_vsT18
chr19:6459814-6459815	cg04117786	0.0463777	17.6288	3.79558e-05	0.039084	0	0	SLC25A23	37	T0_vsT18
chr19:18058885-18058886	cg20958497	0.0397006	17.6442	3.76707e-05	0.039084	0	0	.		T0_vsT18
chr20:33292254-33292255	cg02330053	0.0922536	17.6236	3.80525e-05	0.039084	0	0	NCOA6,TP53INP2	53,25	T0_vsT18
chr22:37882518-37882519	cg17066620	0.0745229	17.6455	3.76462e-05	0.039084	0	0	MFNG	21	T0_vsT18
chr3:31252037-31252038	cg12008420	0.502703	17.6159	3.81958e-05	0.0391614	0	0	.		T0_vsT18
chr19:40502696-40502697	cg03035619	0.0917927	17.5943	3.86022e-05	0.0395309	0	0	ZNF546	24	T0_vsT18
chr2:97482059-97482060	cg15157837	0.0572866	17.5859	3.87606e-05	0.0395313	0	0	CNNM3	30	T0_vsT18
chr2:110258846-110258847	cg03186514	0.915296	17.58	3.88734e-05	0.0395313	0	0	SH3RF3	201	T0_vsT18
chr5:169578306-169578307	cg15069529	0.929863	17.5758	3.89531e-05	0.0395313	0	0	.		T0_vsT18
chr6:16129124-16129125	cg03520771	0.0651982	17.5708	3.90489e-05	0.0395313	0	0	MYLIP	21	T0_vsT18
chr11:68314229-68314230	cg20703037	0.35231	17.5912	3.86595e-05	0.0395313	0	0	PPP6R3	62	T0_vsT18
chr12:56753886-56753887	cg21800439	0.106479	17.5786	3.89003e-05	0.0395313	0	0	STAT2	27	T0_vsT18
chr12:118583290-118583291	cg08946014	0.496082	17.5677	3.9108e-05	0.0395313	0	1	PEBP1	24	T0_vsT18
chr12:123459152-123459153	cg08536481	0.0352879	17.5795	3.88817e-05	0.0395313	0	0	OGFOD2,RP11-197N18.2,ABCB9	39,58,108	T0_vsT18
chr13:75196940-75196941	cg06438530	0.872256	17.5684	3.9095e-05	0.0395313	0	0	.		T0_vsT18
chr19:591390-591391	cg20463312	0.15427	17.5765	3.89393e-05	0.0395313	0	0	AC005559.3,HCN2	7,38	T0_vsT18
chr20:36322369-36322370	cg01925094	0.125224	17.5694	3.90752e-05	0.0395313	0	0	CTNNBL1	69	T0_vsT18
chr1:205601265-205601266	cg06391610	0.0314603	17.56	3.9255e-05	0.0396333	0	0	ELK4	19	T0_vsT18
chr10:120840717-120840718	cg11223711	0.089519	17.5543	3.93643e-05	0.0396505	0	0	EIF3A	34	T0_vsT18
chr11:64059453-64059454	cg14576565	0.0886106	17.5549	3.93541e-05	0.0396505	0	0	KCNK4,RP11-783K16.10	35,48	T0_vsT18
chr4:2936284-2936285	cg09633129	0.146747	17.551	3.94296e-05	0.0396699	0	0	MFSD10,NOP14-AS1	31,62	T0_vsT18
chr1:249167575-249167576	cg16319119	0.0412589	17.5336	3.97657e-05	0.0397092	0	0	.		T0_vsT18
chr2:85132392-85132393	cg00954003	0.062844	17.5369	3.97026e-05	0.0397092	0	0	TMSB10,TRABD2A	13,68	T0_vsT18
chr4:39529412-39529413	cg25227227	0.0343353	17.5328	3.97825e-05	0.0397092	0	0	UGDH,UGDH-AS1	26,36	T0_vsT18
chr5:176433461-176433462	cg10128203	0.0453556	17.5323	3.97918e-05	0.0397092	0	0	UIMC1	54	T0_vsT18
chr11:1593555-1593556	cg15432125	0.0326066	17.5357	3.97263e-05	0.0397092	0	0	DUSP8,KRTAP5-AS1	34,33	T0_vsT18
chr14:44408417-44408418	cg10074290	0.785682	17.5353	3.9733e-05	0.0397092	0	0	.		T0_vsT18
chr14:50087544-50087545	cg02873700	0.0443843	17.54	3.96417e-05	0.0397092	0	0	MGAT2,RP11-649E7.5,RPL36AL	19,9,21	T0_vsT18
chr6:17707172-17707173	cg27189276	0.0386111	17.5293	3.98502e-05	0.0397213	0	0	RP11-500C11.3,NUP153	15,30	T0_vsT18
chr19:46172501-46172502	cg27657862	0.230149	17.5265	3.99038e-05	0.0397288	0	0	GIPR	37	T0_vsT18
chr11:67159389-67159390	cg02231295	0.0446944	17.5234	3.99653e-05	0.039744	0	0	RAD9A	26	T0_vsT18
chr2:39347986-39347987	cg18386867	0.194799	17.5133	4.01642e-05	0.039758	0	0	SOS1	50	T0_vsT18
chr11:64073135-64073136	cg03195230	0.0785891	17.5185	4.00606e-05	0.039758	0	0	ESRRA	29	T0_vsT18
chr13:113973620-113973621	cg15623795	0.874648	17.5139	4.01524e-05	0.039758	0	0	LAMP1	39	T0_vsT18
chr22:43253295-43253296	cg20249473	0.0403648	17.5175	4.00819e-05	0.039758	0	0	ARFGAP3,PACSIN2	30136	T0_vsT18
chr9:80923131-80923132	cg09583862	0.902863	17.4982	4.04613e-05	0.0399628	0	0	PSAT1	20	T0_vsT18
chr9:140149675-140149676	cg01273125	0.0304757	17.4949	4.05278e-05	0.0399628	0	0	NELFB	22	T0_vsT18
chr15:83673816-83673817	cg02750322	0.468524	17.4934	4.0557e-05	0.0399628	0	1	C15orf40,RP11-382A20.5	20101	T0_vsT18
chr22:50060970-50060971	cg17564741	0.0935525	17.4948	4.0529e-05	0.0399628	0	0	.		T0_vsT18
chr8:145542193-145542194	cg08453238	0.679138	17.4884	4.06554e-05	0.0400139	0	0	DGAT1	26	T0_vsT18
chr6:37504610-37504611	cg26579986	0.461543	17.4779	4.08667e-05	0.0401055	0	0	.		T0_vsT18
chr12:120884138-120884139	cg16021483	0.0374209	17.4768	4.08883e-05	0.0401055	0	0	TRIAP1,AL021546.6,GATC	20,39,23	T0_vsT18
chr22:24181212-24181213	cg11417653	0.0479527	17.4805	4.08149e-05	0.0401055	0	0	DERL3	18	T0_vsT18
chr4:152272116-152272117	ch.4.152491566R	0.0934054	17.4711	4.10031e-05	0.0401723	1	1	RP11-731D1.4	3	T0_vsT18
chr4:57687839-57687840	cg13197406	0.0320145	17.4662	4.11017e-05	0.0402231	0	0	SPINK2	14	T0_vsT18
chr2:25389040-25389041	cg14357535	0.0764985	17.454	4.13482e-05	0.0402654	0	0	POMC	27	T0_vsT18
chr2:87034800-87034801	cg22728534	0.077269	17.4452	4.15264e-05	0.0402654	0	0	CD8A	42	T0_vsT18
chr7:64023661-64023662	cg18712677	0.119572	17.4421	4.15891e-05	0.0402654	0	0	ZNF680	15	T0_vsT18
chr7:65338427-65338428	cg10774155	0.043484	17.4409	4.1613e-05	0.0402654	0	1	VKORC1L1	29	T0_vsT18
chr7:84571827-84571828	cg23127585	0.762489	17.4429	4.15726e-05	0.0402654	0	0	.		T0_vsT18
chr15:59981794-59981795	cg14533361	0.0942627	17.4472	4.14856e-05	0.0402654	0	0	BNIP2	35	T0_vsT18
chr17:77804193-77804194	cg00192636	0.893853	17.4491	4.14466e-05	0.0402654	0	0	.		T0_vsT18
chr19:10514434-10514435	cg05370860	0.0351439	17.4517	4.13929e-05	0.0402654	0	0	MIR1181,CDC37	11,51	T0_vsT18
chr19:54693861-54693862	cg13622047	0.167615	17.4614	4.1197e-05	0.0402654	0	0	TSEN34,MBOAT7	32,43	T0_vsT18
chr22:38669222-38669223	cg17603184	0.0483367	17.4524	4.13794e-05	0.0402654	0	0	TMEM184B	50	T0_vsT18
chr5:176830535-176830536	cg10050884	0.0575433	17.4363	4.17077e-05	0.0403116	0	0	F12,GRK6	21,63	T0_vsT18
chr1:5921257-5921258	ch.1.5843844F	0.0570854	17.4088	4.22739e-05	0.0405775	0	0	.		T0_vsT18
chr12:56321730-56321731	cg01791737	0.0815627	17.4088	4.22727e-05	0.0405775	0	0	WIBG,DGKA	52,63	T0_vsT18
chr14:73925575-73925576	cg14040252	0.106571	17.4057	4.23377e-05	0.0405775	0	0	NUMB	70	T0_vsT18
chr14:105531893-105531894	cg26514492	0.0680539	17.4171	4.21009e-05	0.0405775	0	0	GPR132	27	T0_vsT18
chr16:29624206-29624207	cg10098729	0.0850384	17.4179	4.20854e-05	0.0405775	0	1	.		T0_vsT18
chr16:31119650-31119651	cg15785580	0.0463902	17.4046	4.23601e-05	0.0405775	0	0	BCKDK,AC135050.1	23,11	T0_vsT18
chr19:797459-797460	cg25536300	0.0376649	17.411	4.22284e-05	0.0405775	0	0	PTBP1	35	T0_vsT18
chr19:47744517-47744518	cg06513194	0.179658	17.4073	4.23035e-05	0.0405775	0	0	.		T0_vsT18
chr7:100027352-100027353	cg21679810	0.165989	17.3945	4.25704e-05	0.0406883	0	0	MEPCE,ZCWPW1	34,40	T0_vsT18
chr11:94501461-94501462	cg08402652	0.116549	17.3954	4.25516e-05	0.0406883	0	0	AMOTL1	91	T0_vsT18
chr17:81041756-81041757	cg17487617	0.634908	17.3913	4.26373e-05	0.040707	1	0	METRNL	55	T0_vsT18
chr19:13875323-13875324	cg24025995	0.0922277	17.3844	4.27819e-05	0.0407998	0	0	MRI1	22	T0_vsT18
chr7:55601226-55601227	cg04322486	0.0717961	17.3794	4.28858e-05	0.0408536	0	0	VOPP1	117	T0_vsT18
chr3:171176940-171176941	cg23533254	0.0850235	17.3744	4.29925e-05	0.0408648	0	0	TNIK	121	T0_vsT18
chr7:2912098-2912099	cg21836121	0.86898	17.376	4.29588e-05	0.0408648	0	0	.		T0_vsT18
chr16:2318026-2318027	cg19257829	0.080633	17.3699	4.30862e-05	0.0409086	0	0	AC009065.2,MIR940,RNPS1	17,31,40	T0_vsT18
chr10:99447073-99447074	cg16906375	0.101278	17.3546	4.34114e-05	0.0410675	0	0	AVPI1	18	T0_vsT18
chr11:47788923-47788924	cg17808500	0.0430283	17.3565	4.33704e-05	0.0410675	0	0	FNBP4	43	T0_vsT18
chr11:67250443-67250444	cg25989057	0.0483282	17.3597	4.33032e-05	0.0410675	0	0	AIP	23	T0_vsT18
chr11:104915759-104915760	cg05671385	0.0650119	17.353	4.34446e-05	0.0410675	0	0	CASP1,CARD16	33,19	T0_vsT18
chr1:26758543-26758544	cg21907877	0.0779813	17.3233	4.40821e-05	0.0415241	0	0	DHDDS	32	T0_vsT18
chr2:113931565-113931566	cg13273136	0.078954	17.3206	4.41402e-05	0.0415241	0	0	PSD4,AC016683.5	49,13	T0_vsT18
chr9:3527075-3527076	cg14424295	0.221965	17.3265	4.40129e-05	0.0415241	0	0	RFX3,RP11-509J21.1	46,20	T0_vsT18
chr12:98909972-98909973	cg01519081	0.0347622	17.3217	4.41184e-05	0.0415241	0	0	TMPO-AS1,TMPO	19,29	T0_vsT18
chr16:29821173-29821174	cg05694459	0.674273	17.3193	4.4169e-05	0.0415241	0	0	AC009133.14,AC009133.20,MAZ	26,59,44	T0_vsT18
chr1:8889780-8889781	cg26401551	0.0728721	17.3097	4.43779e-05	0.0415364	0	0	RP11-185B14.1	1	T0_vsT18
chr3:50310484-50310485	cg10546523	0.061621	17.2999	4.4591e-05	0.0415364	0	0	SEMA3B	46	T0_vsT18
chr5:141704698-141704699	cg14506320	0.110244	17.2943	4.47132e-05	0.0415364	0	0	SPRY4,AC005592.2	28124	T0_vsT18
chr7:65958608-65958609	cg11764359	0.0545818	17.3041	4.44992e-05	0.0415364	0	0	GS1-124K5.3,GS1-124K5.4	9,9	T0_vsT18
chr7:106505852-106505853	cg14558275	0.145302	17.3004	4.458e-05	0.0415364	0	0	PIK3CG	24	T0_vsT18
chr8:81083339-81083340	cg23295127	0.156158	17.298	4.4634e-05	0.0415364	0	0	TPD52	110	T0_vsT18
chr11:18343626-18343627	cg07583091	0.140099	17.31	4.43703e-05	0.0415364	0	0	HPS5,GTF2H1	36,32	T0_vsT18
chr11:72929054-72929055	cg10287137	0.595448	17.314	4.42846e-05	0.0415364	0	0	P2RY2	27	T0_vsT18
chr12:102091324-102091325	cg21494973	0.0325307	17.3001	4.45881e-05	0.0415364	0	0	CHPT1	41	T0_vsT18
chr15:41952827-41952828	cg24856258	0.0883641	17.3104	4.4363e-05	0.0415364	0	0	MGA	50	T0_vsT18
chr19:45645622-45645623	cg04513316	0.870713	17.2965	4.46663e-05	0.0415364	1	0	MARK4,PPP1R37	196,50	T0_vsT18
chr19:17791197-17791198	cg02617655	0.0686789	17.2903	4.48028e-05	0.0415748	0	0	UNC13A	72	T0_vsT18
chr7:1199847-1199848	cg02984159	0.0857347	17.2804	4.50202e-05	0.0415971	0	0	AC091729.9,ZFAND2A	20,31	T0_vsT18
chr15:40226259-40226260	cg19538502	0.065727	17.2814	4.49976e-05	0.0415971	0	0	EIF2AK4	46	T0_vsT18
chr17:41977951-41977952	cg25717227	0.129967	17.2812	4.50026e-05	0.0415971	0	0	MPP2	47	T0_vsT18
chr19:10181729-10181730	cg24708284	0.864047	17.2868	4.48796e-05	0.0415971	0	0	C3P1	21	T0_vsT18
chr19:36705464-36705465	cg04010651	0.0653446	17.277	4.50943e-05	0.0416208	0	0	ZNF146,ZNF565	35,55	T0_vsT18
chr1:16121890-16121891	cg23005179	0.230832	17.2687	4.52789e-05	0.0417018	0	1	.		T0_vsT18
chr3:127299325-127299326	cg16274890	0.316391	17.2664	4.5331e-05	0.0417018	0	0	TPRA1	62	T0_vsT18
chr12:68428515-68428516	cg13790326	0.385674	17.2641	4.53812e-05	0.0417018	1	0	HNRNPA1P70,IFNG-AS1	1,47	T0_vsT18
chr17:3627394-3627395	cg14781919	0.0339373	17.2673	4.53091e-05	0.0417018	0	0	GSG2,ITGAE	18,88	T0_vsT18
chr22:32146195-32146196	cg25615509	0.0755997	17.2622	4.54244e-05	0.0417018	0	0	PRR14L	31	T0_vsT18
chr10:20329214-20329215	cg20940969	0.363672	17.2586	4.55031e-05	0.0417295	0	0	PLXDC2	60	T0_vsT18
chr11:66033194-66033195	cg14028315	0.868297	17.245	4.58082e-05	0.0419382	0	0	RP11-867G23.1,KLC2	6,60	T0_vsT18
chr14:35183634-35183635	cg16668274	0.0505497	17.2432	4.58498e-05	0.0419382	0	0	CFL2	25	T0_vsT18
chr17:46669485-46669486	cg19047868	0.659626	17.242	4.5877e-05	0.0419382	0	0	HOXB5,HOXB3,HOXB-AS3	30208210	T0_vsT18
chr1:47800167-47800168	cg10715383	0.0911053	17.2318	4.61053e-05	0.0421022	0	0	CMPK1	19	T0_vsT18
chr3:48673001-48673002	cg27099978	0.0378158	17.2291	4.61678e-05	0.0421145	0	0	SLC26A6	24	T0_vsT18
chr13:25496950-25496951	cg13255538	0.0486244	17.2259	4.62406e-05	0.0421363	0	0	CENPJ	33	T0_vsT18
chr12:57914632-57914633	cg19452060	0.0588487	17.2212	4.63466e-05	0.0421882	0	0	DDIT3,MBD6	18,32	T0_vsT18
chr5:178286875-178286876	cg08584628	0.0726067	17.2121	4.65537e-05	0.0422872	0	0	ZNF354B	26	T0_vsT18
chr6:159528654-159528655	cg14691884	0.0807338	17.2132	4.65293e-05	0.0422872	0	0	RP11-13P5.1	10	T0_vsT18
chr3:47205627-47205628	cg01702820	0.0679527	17.2095	4.66142e-05	0.0422975	0	0	KIF9-AS1,SETD2	24,52	T0_vsT18
chr7:105162855-105162856	cg06080252	0.0429036	17.2038	4.67439e-05	0.0423258	0	0	PUS7	27	T0_vsT18
chr17:45727086-45727087	cg01626401	0.076974	17.2049	4.67196e-05	0.0423258	0	0	RP11-580I16.2,KPNB1	26,33	T0_vsT18
chr5:110432432-110432433	cg14864966	0.514016	17.1984	4.68677e-05	0.0423488	0	0	WDR36	21	T0_vsT18
chr16:11374090-11374091	cg01281993	0.77921	17.1985	4.68658e-05	0.0423488	0	0	RMI2	144	T0_vsT18
chr14:77787537-77787538	cg05705989	0.0571477	17.1933	4.69851e-05	0.0423725	0	0	POMT2,GSTZ1	49,30	T0_vsT18
chr17:65242096-65242097	cg26094983	0.0695177	17.193	4.69924e-05	0.0423725	0	0	HELZ	35	T0_vsT18
chr4:108913844-108913845	cg12573538	0.772765	17.1833	4.72162e-05	0.0425297	0	0	HADH	34	T0_vsT18
chr5:31631074-31631075	cg00521380	0.788132	17.1802	4.7289e-05	0.0425359	0	0	.		T0_vsT18
chr6:8042158-8042159	cg08136599	0.718413	17.1788	4.7322e-05	0.0425359	0	0	BLOC1S5,EEF1E1-BLOC1S5,BLOC1S5-TXNDC5	21,49,85	T0_vsT18
chr14:99947712-99947713	cg11141711	0.0378947	17.1754	4.73997e-05	0.0425613	0	0	CCNK,SETD3	46,57	T0_vsT18
chr3:50192449-50192450	cg04614380	0.0526441	17.1727	4.74641e-05	0.0425747	0	0	RP11-493K19.3,SEMA3F	30,39	T0_vsT18
chr5:56469182-56469183	cg20728685	0.0516456	17.167	4.75962e-05	0.0426487	0	0	GPBP1	33	T0_vsT18
chr12:7047250-7047251	cg13085895	0.098423	17.1622	4.7709e-05	0.0426609	0	0	ATN1	38	T0_vsT18
chr12:50794975-50794976	cg18801245	0.0692929	17.1632	4.76841e-05	0.0426609	0	0	LARP4	29	T0_vsT18
chr7:6487512-6487513	cg24000099	0.0340563	17.1563	4.78455e-05	0.0427385	0	0	DAGLB,KDELR2	83,45	T0_vsT18
chr17:73110554-73110555	cg23660755	0.0729029	17.1505	4.79841e-05	0.0428178	0	0	ARMC7	24	T0_vsT18
chr22:45071416-45071417	cg23198222	0.886671	17.1474	4.80557e-05	0.0428373	0	0	PRR5	83	T0_vsT18
chr19:2328553-2328554	cg15492422	0.049456	17.1451	4.81097e-05	0.042841	0	0	LSM7,SPPL2B	32,49	T0_vsT18
chr12:132391307-132391308	cg17138298	0.760167	17.1404	4.82221e-05	0.0428968	0	0	ULK1	61	T0_vsT18
chr18:44497499-44497500	cg05796338	0.0454759	17.1187	4.87376e-05	0.0433105	0	0	PIAS2,KATNAL2	30,67	T0_vsT18
chr2:96987478-96987479	cg14021728	0.133156	17.1127	4.88829e-05	0.0433493	0	0	AC021188.4	12	T0_vsT18
chr5:72744675-72744676	cg05622764	0.0781497	17.1111	4.892e-05	0.0433493	0	0	FOXD1,AC099522.1	14,11	T0_vsT18
chr17:79925999-79926000	cg22884732	0.0829797	17.1106	4.89324e-05	0.0433493	0	0	.		T0_vsT18
chr2:172953134-172953135	cg07936950	0.471699	17.107	4.90188e-05	0.0433812	0	0	DLX1	38	T0_vsT18
chr3:140016071-140016072	cg24875915	0.921922	17.1027	4.91216e-05	0.0434274	0	0	CLSTN2	81	T0_vsT18
chr7:45067055-45067056	cg23991989	0.0792251	17.0901	4.94284e-05	0.0434753	0	0	CCM2	46	T0_vsT18
chr9:115513036-115513037	cg23398826	0.0816927	17.0932	4.93528e-05	0.0434753	0	0	RP11-276E15.4,SNX30	16,43	T0_vsT18
chr10:100174962-100174963	cg07931714	0.0493129	17.0913	4.93986e-05	0.0434753	0	0	PYROXD2	30	T0_vsT18
chr12:75603184-75603185	cg21500166	0.53271	17.0958	4.92897e-05	0.0434753	0	0	KCNC2	30	T0_vsT18
chr15:102285664-102285665	cg03281229	0.0431936	17.0943	4.93256e-05	0.0434753	0	1	RP11-89K11.1	6	T0_vsT18
chr12:69867411-69867412	cg21563219	0.80026	17.0858	4.95328e-05	0.0435226	0	0	FRS2	33	T0_vsT18
chr6:75915727-75915728	cg13800763	0.456638	17.0803	4.96651e-05	0.043563	0	0	COL12A1	67	T0_vsT18
chr18:46469939-46469940	cg14763035	0.819686	17.0797	4.96801e-05	0.043563	0	0	SMAD7	43	T0_vsT18
chr12:34527230-34527231	cg14679607	0.729146	17.0698	4.99234e-05	0.0435699	0	0	.		T0_vsT18
chr12:99037948-99037949	cg21051375	0.034048	17.0757	4.97771e-05	0.0435699	0	0	IKBIP,APAF1	28,42	T0_vsT18
chr14:57275166-57275167	cg20575761	0.379641	17.069	4.99412e-05	0.0435699	0	0	OTX2	38	T0_vsT18
chr14:105956176-105956177	cg22836535	0.117784	17.0701	4.9916e-05	0.0435699	0	0	CRIP1,C14orf80	38,41	T0_vsT18
chr19:14640333-14640334	cg08434594	0.138189	17.0728	4.98494e-05	0.0435699	0	0	MIR639,DNAJB1,TECR	16,40,64	T0_vsT18
chr10:96084493-96084494	cg02929526	0.836869	17.061	5.01399e-05	0.0436989	0	0	PLCE1,NOC3L	91,27	T0_vsT18
chr8:38854062-38854063	cg14938514	0.0455487	17.0563	5.02541e-05	0.0437098	0	0	TM2D2,ADAM9	17,38	T0_vsT18
chr11:65729635-65729636	cg06285486	0.10557	17.0582	5.02088e-05	0.0437098	0	0	SART1	33	T0_vsT18
chr1:43613364-43613365	cg17781893	0.285352	17.0542	5.03059e-05	0.0437107	0	0	FAM183A	20	T0_vsT18
chr2:97523832-97523833	cg23286353	0.0578404	17.0486	5.04446e-05	0.0437429	0	0	ANKRD23,ANKRD39	46,37	T0_vsT18
chr3:10157326-10157327	cg15352224	0.0789412	17.0505	5.03977e-05	0.0437429	0	0	BRK1	15	T0_vsT18
chr16:50579112-50579113	cg06791664	0.885695	17.0458	5.05159e-05	0.0437606	0	0	.		T0_vsT18
chr2:74154016-74154017	cg22544376	0.0464958	17.0412	5.06296e-05	0.043815	0	0	DGUOK	22	T0_vsT18
chr14:24891647-24891648	cg17109198	0.0923448	17.0377	5.07157e-05	0.0438454	0	0	.		T0_vsT18
chr19:1407468-1407469	cg18939928	0.0413016	17.0303	5.09019e-05	0.0439621	0	0	DAZAP1	46	T0_vsT18
chr7:140098092-140098093	cg05356848	0.169742	17.0182	5.12039e-05	0.0440178	0	0	SLC37A3	56	T0_vsT18
chr10:6244954-6244955	cg02572278	0.0441059	17.0196	5.11694e-05	0.0440178	0	0	PFKFB3,RP11-414H17.5	111,16	T0_vsT18
chr12:122327043-122327044	cg20566420	0.0966438	17.0215	5.11204e-05	0.0440178	0	0	PSMD9,RP11-87C12.2	42,51	T0_vsT18
chr19:6772475-6772476	cg12950995	0.0739797	17.0175	5.12222e-05	0.0440178	0	0	VAV1	29	T0_vsT18
chr19:12786938-12786939	cg07201740	0.91293	17.0219	5.11108e-05	0.0440178	0	0	DHPS	19	T0_vsT18
chr11:1404554-1404555	cg16863718	0.0842548	17.0124	5.13503e-05	0.0440839	0	0	.		T0_vsT18
chr7:1710516-1710517	cg18983604	0.241959	17.0043	5.1555e-05	0.0442155	0	0	.		T0_vsT18
chr11:27722722-27722723	cg03747251	0.122005	17.0003	5.16579e-05	0.0442596	0	0	BDNF,RP11-587D21.4	93,97	T0_vsT18
chr15:69990494-69990495	cg04720966	0.178699	16.9964	5.17563e-05	0.0442998	0	0	.		T0_vsT18
chr3:47554419-47554420	cg19930721	0.0570775	16.9923	5.18614e-05	0.0443456	0	0	ELP6	28	T0_vsT18
chr2:219249918-219249919	cg11378979	0.843476	16.9861	5.20192e-05	0.0443923	0	0	SLC11A1	34	T0_vsT18
chr3:9975336-9975337	cg01087880	0.05872	16.9875	5.19818e-05	0.0443923	0	0	CRELD1	23	T0_vsT18
chr7:211714-211715	ch.7.8314F	0.0832304	16.9771	5.22498e-05	0.0444158	0	0	FAM20C	100	T0_vsT18
chr10:8085558-8085559	cg04752299	0.0958049	16.9802	5.21703e-05	0.0444158	0	0	.		T0_vsT18
chr16:68057150-68057151	cg06703304	0.0849051	16.9769	5.22533e-05	0.0444158	0	0	DDX28,DUS2	27,90	T0_vsT18
chr22:50982818-50982819	cg18782736	0.0479846	16.982	5.21242e-05	0.0444158	0	0	CTA-384D8.35	5	T0_vsT18
chr20:30795258-30795259	cg10466212	0.0801264	16.9739	5.23316e-05	0.0444384	0	0	PLAGL2,POFUT1	23,28	T0_vsT18
chr1:10270654-10270655	cg24722365	0.0608342	16.9649	5.25635e-05	0.0445914	0	0	KIF1B	75	T0_vsT18
chr1:53793125-53793126	cg22933337	0.0347899	16.9535	5.28588e-05	0.0447977	0	0	RP4-784A16.5,LRP8	18,71	T0_vsT18
chr6:42989277-42989278	cg18802486	0.0380612	16.951	5.29234e-05	0.0448083	0	0	RRP36	13	T0_vsT18
chr3:52479630-52479631	cg07357683	0.713286	16.9468	5.30325e-05	0.0448565	0	0	SEMA3G	17	T0_vsT18
chr1:33219580-33219581	cg17716617	0.0644069	16.937	5.32904e-05	0.0449862	0	0	KIAA1522	54	T0_vsT18
chr4:3443025-3443026	cg27636612	0.82237	16.937	5.32899e-05	0.0449862	0	0	HGFAC	29	T0_vsT18
chr1:3817014-3817015	cg02529166	0.04628	16.9262	5.35737e-05	0.0451098	0	0	C1orf174,RP13-15E13.1	29,43	T0_vsT18
chr2:236868861-236868862	cg01121910	0.778598	16.9254	5.35941e-05	0.0451098	0	0	AGAP1	435	T0_vsT18
chr3:52269736-52269737	cg16457413	0.841962	16.9274	5.35421e-05	0.0451098	0	0	TLR9,TWF2	30,26	T0_vsT18
chr15:25018227-25018228	cg13495693	0.515473	16.9225	5.36715e-05	0.0451307	0	0	.		T0_vsT18
chr17:6939140-6939141	cg21577651	0.0830001	16.9198	5.37429e-05	0.0451467	0	0	SLC16A13	14	T0_vsT18
chr7:111846705-111846706	cg11552183	0.0461622	16.9105	5.39882e-05	0.0452203	0	0	DOCK4,ZNF277	108,32	T0_vsT18
chr16:27191053-27191054	cg14788726	0.0898595	16.9137	5.39025e-05	0.0452203	0	0	.		T0_vsT18
chr22:31822710-31822711	cg02906247	0.909032	16.911	5.39746e-05	0.0452203	0	0	DRG1	81	T0_vsT18
chr19:55404913-55404914	cg23697418	0.600287	16.9033	5.41798e-05	0.0452958	0	1	.		T0_vsT18
chr22:24407812-24407813	cg09870251	0.0658674	16.9031	5.41837e-05	0.0452958	0	0	CABIN1	83	T0_vsT18
chr1:156023859-156023860	cg16014989	0.035187	16.8844	5.46854e-05	0.0453822	0	0	UBQLN4,LAMTOR2	22,17	T0_vsT18
chr4:71705278-71705279	cg27226861	0.289086	16.8922	5.44754e-05	0.0453822	0	0	GRSF1	25	T0_vsT18
chr6:2999962-2999963	cg08068635	0.0592612	16.8954	5.43915e-05	0.0453822	1	0	RP1-90J20.8,NQO2	26,41	T0_vsT18
chr6:32912291-32912292	cg12962429	0.0697363	16.8854	5.46593e-05	0.0453822	0	0	XXbac-BPG181M17.5	62	T0_vsT18
chr6:159071008-159071009	cg07265541	0.0585867	16.8876	5.46006e-05	0.0453822	0	0	SYTL3	52	T0_vsT18
chr10:6778122-6778123	cg17246182	0.905677	16.8886	5.45738e-05	0.0453822	0	0	RP11-554I8.2	6	T0_vsT18
chr11:68579907-68579908	cg08850249	0.823315	16.8835	5.47091e-05	0.0453822	0	0	CPT1A	89	T0_vsT18
chrX:136016072-136016073	cg19618978	0.372332	16.8893	5.45525e-05	0.0453822	0	1	RP11-308D16.4	13	T0_vsT18
chr7:41189021-41189022	cg08757028	0.931084	16.8794	5.48193e-05	0.0454298	1	0	.		T0_vsT18
chr3:184870893-184870894	cg25234159	0.0505933	16.8736	5.49771e-05	0.0454674	0	0	C3orf70	24	T0_vsT18
chr4:166248713-166248714	cg04157983	0.0309266	16.8708	5.50522e-05	0.0454674	0	0	MSMO1	23	T0_vsT18
chr11:64072691-64072692	cg03474219	0.0530638	16.8699	5.50761e-05	0.0454674	0	0	ESRRA	29	T0_vsT18
chr12:121838152-121838153	cg01474481	0.0455023	16.8728	5.49977e-05	0.0454674	0	0	RNF34,ANAPC5	23,70	T0_vsT18
chr15:66084815-66084816	cg16701105	0.0722575	16.8672	5.51507e-05	0.0454811	0	0	DENND4A,RAB11A	37,64	T0_vsT18
chr19:16771812-16771813	cg14560835	0.099238	16.8654	5.51984e-05	0.0454811	0	0	CTC-429P9.4,SMIM7,TMEM38A	50,24,24	T0_vsT18
chr11:134026755-134026756	cg24968964	0.873989	16.8572	5.54221e-05	0.0456217	0	0	NCAPD3	57	T0_vsT18
chr5:169659745-169659746	cg05694095	0.926534	16.8527	5.55459e-05	0.0456563	0	0	C5orf58	23	T0_vsT18
chr17:79650519-79650520	cg07029396	0.0925087	16.8518	5.55703e-05	0.0456563	0	0	ARL16,HGS	23,65	T0_vsT18
chr1:43001072-43001073	cg24501381	0.478375	16.8382	5.59419e-05	0.0457438	0	0	CCDC30	37	T0_vsT18
chr2:140975034-140975035	cg03506134	0.743056	16.8297	5.61754e-05	0.0457438	0	1	AC092156.3	1	T0_vsT18
chr2:179397513-179397514	cg09915519	0.915017	16.8343	5.6049e-05	0.0457438	0	0	TTN-AS1,TTN	64,77	T0_vsT18
chr2:241075715-241075716	cg15950627	0.0686196	16.8314	5.61305e-05	0.0457438	0	0	MYEOV2	42	T0_vsT18
chr3:47844363-47844364	cg02608231	0.0466165	16.8277	5.62311e-05	0.0457438	0	0	DHX30	56	T0_vsT18
chr7:21467710-21467711	cg04028315	0.0271155	16.8283	5.62144e-05	0.0457438	0	0	SP4	19	T0_vsT18
chr12:98987358-98987359	cg10097813	0.0426692	16.8412	5.58588e-05	0.0457438	0	0	SLC25A3	20	T0_vsT18
chr12:117257305-117257306	cg19208700	0.0542759	16.8396	5.59049e-05	0.0457438	0	0	RNFT2	58	T0_vsT18
chr14:99311046-99311047	ch.14.98380799F	0.0819689	16.8331	5.60821e-05	0.0457438	0	0	AL132796.1	3	T0_vsT18
chr19:5577053-5577054	cg25668777	0.795182	16.8335	5.60721e-05	0.0457438	0	1	SNRPEP4	4	T0_vsT18
chr19:47164447-47164448	cg02700369	0.0807976	16.8266	5.62618e-05	0.0457438	0	0	DACT3,DACT3-AS1	30,22	T0_vsT18
chr7:76256818-76256819	cg07545535	0.0362692	16.8228	5.63668e-05	0.0457732	0	1	AC004980.7,POMZP3,UPK3B	29,13,93	T0_vsT18
chr10:124909889-124909890	cg14822490	0.594514	16.8215	5.64043e-05	0.0457732	0	0	HMX2	23	T0_vsT18
chr16:15743797-15743798	cg06254123	0.0429658	16.8186	5.64836e-05	0.0457943	0	0	NDE1	78	T0_vsT18
chr3:48693597-48693598	cg26468478	0.112412	16.813	5.66386e-05	0.0458768	0	0	CELSR3	44	T0_vsT18
chr7:26240675-26240676	cg26451575	0.0438612	16.8055	5.68508e-05	0.0460053	0	0	HNRNPA2B1,CBX3	32,29	T0_vsT18
chr2:65454692-65454693	cg23158051	0.0348437	16.7965	5.71023e-05	0.0461221	0	0	ACTR2	23	T0_vsT18
chr10:93558305-93558306	cg08677202	0.0318194	16.7966	5.71001e-05	0.0461221	0	0	TNKS2-AS1,TNKS2	18,25	T0_vsT18
chr17:8222359-8222360	cg23843103	0.773944	16.7854	5.74135e-05	0.0462865	0	0	AC135178.7,ARHGEF15	5,28	T0_vsT18
chr21:35288186-35288187	cg15249164	0.0551089	16.7868	5.73761e-05	0.0462865	0	0	ATP5O,LINC00649	22,36	T0_vsT18
chr11:2424015-2424016	cg02485697	0.821674	16.7797	5.75751e-05	0.0463733	0	0	TSSC4	50	T0_vsT18
chr20:1305960-1305961	cg26526001	0.0459964	16.7654	5.79825e-05	0.0466577	0	0	SDCBP2,SDCBP2-AS1	46,48	T0_vsT18
chr9:19409011-19409012	cg25538855	0.502259	16.7613	5.81005e-05	0.046709	0	1	ACER2	21	T0_vsT18
chr3:52739927-52739928	cg09307279	0.0433768	16.7579	5.81977e-05	0.0467435	0	0	GLT8D1,SPCS1	36,28	T0_vsT18
chr3:49967358-49967359	cg27088877	0.0405164	16.7556	5.82625e-05	0.0467519	0	0	MON1A	27	T0_vsT18
chr1:156561386-156561387	cg20047116	0.0776582	16.7517	5.83757e-05	0.0467555	0	0	APOA1BP	14	T0_vsT18
chr5:1111731-1111732	cg24886748	0.11492	16.7518	5.8373e-05	0.0467555	0	0	SLC12A7	180	T0_vsT18
chr4:175462051-175462052	cg02075854	0.809448	16.7496	5.84348e-05	0.0467593	0	0	RP11-440I14.4,RP11-440I14.2	6,13	T0_vsT18
chr17:8906386-8906387	cg21721093	0.0573286	16.7414	5.86728e-05	0.0469061	0	0	.		T0_vsT18
chr1:6614800-6614801	cg07997941	0.200204	16.7337	5.88932e-05	0.0469513	0	0	NOL9,TAS1R1	35,32	T0_vsT18
chr1:29096136-29096137	cg17424822	0.558681	16.7362	5.88205e-05	0.0469513	0	1	YTHDF2	31	T0_vsT18
chr6:132331662-132331663	ch.6.132373355F	0.0565421	16.7354	5.88447e-05	0.0469513	0	0	RP11-69I8.3	34	T0_vsT18
chr3:126423063-126423064	cg00694512	0.0335011	16.7248	5.91515e-05	0.0471136	0	0	CHCHD6	85	T0_vsT18
chr12:50505520-50505521	cg17648773	0.0577285	16.7185	5.93371e-05	0.0472177	0	0	COX14,RP4-605O3.4	19,34	T0_vsT18
chr22:25575426-25575427	cg16626480	0.383887	16.709	5.96155e-05	0.0473954	0	0	CTA-221G9.10,KIAA1671	3106	T0_vsT18
chr22:50920015-50920016	cg08366534	0.084528	16.7056	5.97141e-05	0.04743	0	0	ADM2	19	T0_vsT18
chr1:161068138-161068139	cg23651323	0.03666	16.6955	6.00125e-05	0.047623	0	0	KLHDC9	15	T0_vsT18
chr6:18267796-18267797	cg04401763	0.85598	16.69	6.01752e-05	0.0476826	0	0	.		T0_vsT18
chr15:72410485-72410486	cg12416303	0.0900594	16.6855	6.03073e-05	0.0476826	0	0	SENP8,MYO9A	33,67	T0_vsT18
chr17:22020759-22020760	cg11212901	0.755961	16.6855	6.03094e-05	0.0476826	0	0	.		T0_vsT18
chr22:21457247-21457248	cg22207764	0.0627039	16.686	6.02923e-05	0.0476826	0	0	BCRP2	9	T0_vsT18
chr1:3508884-3508885	cg17183752	0.831199	16.6742	6.06454e-05	0.0477529	0	0	MEGF6	157	T0_vsT18
chr6:31589196-31589197	cg14943908	0.150139	16.6695	6.07868e-05	0.0477529	0	0	PRRC2A	157	T0_vsT18
chr11:46141386-46141387	cg16480966	0.0220798	16.6748	6.06274e-05	0.0477529	0	0	PHF21A	64	T0_vsT18
chr11:46867927-46867928	cg09822824	0.100759	16.6703	6.07626e-05	0.0477529	0	0	LRP4-AS1,CKAP5	19,46	T0_vsT18
chr13:50645667-50645668	cg11470619	0.394143	16.6763	6.05818e-05	0.0477529	0	0	DLEU2	46	T0_vsT18
chr17:6914870-6914871	cg16052068	0.541721	16.6773	6.05534e-05	0.0477529	0	1	RNASEK,RNASEK-C17orf49,RP11-589P10.7,AC027763.2	23,38,89,86	T0_vsT18
chr17:78179311-78179312	cg06521051	0.758533	16.6697	6.07803e-05	0.0477529	0	0	RP11-334C17.5,CARD14	13,75	T0_vsT18
chr4:85165689-85165690	cg25182211	0.762231	16.6601	6.10676e-05	0.0478063	0	1	RP11-274J2.1,RP11-8L2.1	3,41	T0_vsT18
chr13:51484248-51484249	cg10632429	0.0476967	16.6544	6.12389e-05	0.0478063	0	0	RNASEH2B-AS1,RNASEH2B	22,28	T0_vsT18
chr14:77364620-77364621	cg27052900	0.731947	16.6634	6.09676e-05	0.0478063	0	1	.		T0_vsT18
chr15:29562077-29562078	cg06842781	0.0400826	16.6543	6.12438e-05	0.0478063	0	0	NDNL2,FAM189A1	12103	T0_vsT18
chr17:48152797-48152798	cg03828668	0.820189	16.6572	6.1154e-05	0.0478063	0	0	ITGA3	36	T0_vsT18
chr19:46088158-46088159	cg19686301	0.0646175	16.657	6.1161e-05	0.0478063	0	0	OPA3	71	T0_vsT18
chr20:62339561-62339562	cg19088196	0.0857466	16.664	6.09492e-05	0.0478063	0	0	ARFRP1,ZGPAT,RP4-583P15.15	37,40,52	T0_vsT18
chr19:1155030-1155031	cg19649900	0.580675	16.648	6.14337e-05	0.047911	0	0	SBNO2	101	T0_vsT18
chr1:40563105-40563106	cg08200399	0.108641	16.6368	6.17719e-05	0.0480425	0	0	PPT1	27	T0_vsT18
chr1:44440458-44440459	cg18714509	0.0637767	16.6187	6.23244e-05	0.0480425	0	0	ATP6V0B	21	T0_vsT18
chr1:113615592-113615593	cg26091510	0.0765406	16.6168	6.23833e-05	0.0480425	0	0	RP11-31F15.2,LRIG2	28,24	T0_vsT18
chr5:131625241-131625242	cg05533233	0.735618	16.6242	6.21584e-05	0.0480425	0	0	P4HA2	99	T0_vsT18
chr6:42897598-42897599	cg22671580	0.0680248	16.6219	6.22292e-05	0.0480425	0	0	CNPY3	19	T0_vsT18
chr7:100303735-100303736	cg14227687	0.0349506	16.6203	6.22755e-05	0.0480425	0	0	POP7	14	T0_vsT18
chr7:148420058-148420059	cg21828951	0.153532	16.63	6.19802e-05	0.0480425	0	0	CUL1	41	T0_vsT18
chr9:26797396-26797397	cg01574626	0.730715	16.615	6.244e-05	0.0480425	0	0	SNORA31	1	T0_vsT18
chr11:79114296-79114297	cg17233829	0.918683	16.6212	6.225e-05	0.0480425	0	0	MIR708,TENM4	4237	T0_vsT18
chr12:48111464-48111465	cg20042171	0.221502	16.6173	6.23701e-05	0.0480425	0	0	ENDOU,RP1-197B17.3	20,41	T0_vsT18
chr12:54674009-54674010	cg09158487	0.134603	16.6372	6.17607e-05	0.0480425	0	0	RP11-968A15.8,HNRNPA1,CBX5	95,34,49	T0_vsT18
chr12:124457431-124457432	cg18886739	0.103435	16.6242	6.21586e-05	0.0480425	0	0	RP11-214K3.18,CCDC92,ZNF664,FAM101A	13,70,34,180	T0_vsT18
chr15:37387438-37387439	cg15902390	0.2211	16.6326	6.18999e-05	0.0480425	0	0	MEIS2	110	T0_vsT18
chr16:88522584-88522585	cg05578570	0.0902479	16.6273	6.20637e-05	0.0480425	0	0	ZFPM1	131	T0_vsT18
chr19:797398-797399	cg06879406	0.113817	16.6161	6.24054e-05	0.0480425	0	0	PTBP1	35	T0_vsT18
chr9:136025003-136025004	cg08107930	0.0753581	16.6098	6.25995e-05	0.0481222	0	0	RALGDS	74	T0_vsT18
chr1:54666022-54666023	cg16911594	0.0676427	16.6067	6.26953e-05	0.0481528	0	1	RP11-446E24.4,CYB5RL,MRPL37	56,39,34	T0_vsT18
chr7:23525412-23525413	cg07110854	0.848449	16.5986	6.2945e-05	0.0483015	0	0	.		T0_vsT18
chr5:166130870-166130871	ch.5.3135990F	0.0838479	16.5885	6.32589e-05	0.0483697	0	0	.		T0_vsT18
chr20:62130500-62130501	cg01915951	0.0606703	16.5912	6.31771e-05	0.0483697	0	0	EEF1A2	29	T0_vsT18
chr21:34914437-34914438	cg07211739	0.0517454	16.5917	6.31598e-05	0.0483697	0	0	GART,SON	43,48	T0_vsT18
chr22:36925319-36925320	cg26819140	0.033691	16.5901	6.32107e-05	0.0483697	0	0	EIF3D	33	T0_vsT18
chr11:63654902-63654903	cg11237228	0.895399	16.5818	6.34704e-05	0.0484884	0	0	MARK2	66	T0_vsT18
chr1:178501588-178501589	cg25104133	0.182404	16.5764	6.36379e-05	0.0485732	0	0	TEX35	34	T0_vsT18
chr19:33793161-33793162	cg15709087	0.0465111	16.5679	6.3905e-05	0.0487338	0	0	CEBPA,AC008738.1,CEBPA-AS1,CEBPA-AS1	13,13,12,12	T0_vsT18
chr3:47017714-47017715	cg07049905	0.0679976	16.556	6.42821e-05	0.0489779	0	0	CCDC12	60	T0_vsT18
chr19:41197049-41197050	cg19221841	0.0546284	16.5486	6.4517e-05	0.0491134	0	0	NUMBL	23	T0_vsT18
chr1:20988005-20988006	cg10583638	0.0503156	16.545	6.46308e-05	0.0491566	0	0	DDOST	23	T0_vsT18
chr1:203266231-203266232	cg09671119	0.814428	16.5416	6.47392e-05	0.0491955	0	0	.		T0_vsT18
chr5:54848335-54848336	cg07276083	0.71851	16.5385	6.48383e-05	0.0492274	0	1	AK4P2	3	T0_vsT18
chr5:148724853-148724854	cg22725986	0.0410759	16.5342	6.49744e-05	0.0492437	0	0	GRPEL2	17	T0_vsT18
chr18:3262033-3262034	cg11668079	0.0672053	16.5353	6.49393e-05	0.0492437	0	0	RP13-270P17.1,MYL12B	21,24	T0_vsT18
chr11:72504708-72504709	cg25433490	0.0637391	16.5305	6.50955e-05	0.049256	0	0	ARAP1,STARD10	133,54	T0_vsT18
chr16:28844428-28844429	cg00643253	0.635527	16.5302	6.51051e-05	0.049256	0	1	RP11-24N18.1,ATXN2L	14,28	T0_vsT18
chr3:124606174-124606175	cg06443388	0.05243	16.5208	6.54062e-05	0.0493969	0	0	ITGB5	76	T0_vsT18
chr7:101386951-101386952	cg21428081	0.100029	16.521	6.54004e-05	0.0493969	0	0	.		T0_vsT18
chr19:47734715-47734716	cg11809157	0.0592135	16.5133	6.56479e-05	0.0495359	0	0	BBC3	23	T0_vsT18
chr14:101291500-101291501	cg19643803	0.603319	16.5113	6.57151e-05	0.0495432	0	0	MEG3	124	T0_vsT18
chr1:155145786-155145787	cg26233468	0.0353988	16.5059	6.58888e-05	0.0495872	0	0	KRTCAP2,RP11-201K10.3,TRIM46	27,41,32	T0_vsT18
chr17:60142592-60142593	cg00013410	0.125405	16.5075	6.58353e-05	0.0495872	0	0	MED13	21	T0_vsT18
chr1:43312353-43312354	cg16314058	0.0434486	16.495	6.62445e-05	0.0498113	0	0	ZNF691,RP11-342M1.3	25,19	T0_vsT18
chr16:25269336-25269337	cg26642890	0.112338	16.4864	6.65239e-05	0.0499777	1	0	ZKSCAN2	15	T0_vsT18
chr19:40561828-40561829	cg27396447	0.119107	16.4839	6.66072e-05	0.0499966	0	0	ZNF780B,AC005614.5	17,34	T0_vsT18
chr11:61100527-61100528	cg08323199	0.0415861	16.4756	6.68809e-05	0.0501146	0	0	DAK,DDB1	44,60	T0_vsT18
chr19:38085709-38085710	cg16708785	0.0329457	16.4764	6.68544e-05	0.0501146	0	0	ZNF540,ZNF571	36,21	T0_vsT18
chr12:132628969-132628970	cg18343121	0.0362591	16.467	6.71649e-05	0.0502613	0	0	DDX51,NOC4L	30,33	T0_vsT18
chr15:74907231-74907232	cg15807180	0.0355688	16.4661	6.71935e-05	0.0502613	0	0	CLK3,CTD-3154N5.1	64,21	T0_vsT18
chr2:178077188-178077189	cg26709537	0.0396116	16.4621	6.73258e-05	0.0503165	0	0	MIR4444-1,AC079305.8,HNRNPA3	5,39,14	T0_vsT18
chr2:18923186-18923187	cg12656424	0.774273	16.4544	6.75846e-05	0.0504661	0	0	.		T0_vsT18
chr6:10383669-10383670	cg21040775	0.409135	16.4508	6.77041e-05	0.0504779	0	0	.		T0_vsT18
chr6:127837030-127837031	cg11010178	0.453909	16.4504	6.77177e-05	0.0504779	0	0	SOGA3,SOGA3	66,66	T0_vsT18
chr1:120612147-120612148	cg10104810	0.031985	16.4448	6.7904e-05	0.0505729	0	0	NOTCH2	30	T0_vsT18
chr11:65621144-65621145	cg04761267	0.811277	16.4394	6.80867e-05	0.0506651	0	0	CFL1,SNX32	74,28	T0_vsT18
chr2:61293272-61293273	cg24053619	0.0485578	16.4341	6.82627e-05	0.0507522	0	0	KIAA1841	41	T0_vsT18
chr10:73356962-73356963	cg14150687	0.845124	16.4251	6.85664e-05	0.0508926	1	0	CDH23	274	T0_vsT18
chr11:67141079-67141080	cg19248367	0.0453791	16.425	6.85699e-05	0.0508926	0	0	AP003419.11,CLCF1	38,23	T0_vsT18
chr1:1334798-1334799	cg08470185	0.0386382	16.4198	6.87468e-05	0.050936	0	0	RP4-758J18.2,CCNL2	17,40	T0_vsT18
chr6:29910273-29910274	cg17678719	0.039526	16.421	6.87055e-05	0.050936	1	0	HLA-A,HCG4P5	34,30	T0_vsT18
chr8:48651122-48651123	cg17194240	0.0395501	16.4155	6.88942e-05	0.0510013	0	0	CEBPD	16	T0_vsT18
chr14:105487229-105487230	cg13905388	0.0435792	16.4023	6.93434e-05	0.0512897	0	0	CDCA4	19	T0_vsT18
chr1:54665764-54665765	cg10336722	0.121585	16.3957	6.95686e-05	0.051412	0	0	RP11-446E24.4,CYB5RL,MRPL37	56,39,34	T0_vsT18
chr4:170533425-170533426	cg01112923	0.06264	16.3804	7.00956e-05	0.0517571	0	0	CLCN3,NEK1	62,38	T0_vsT18
chr12:123465054-123465055	cg26808298	0.0651315	16.3767	7.02229e-05	0.0518066	0	0	RP11-197N18.2,ARL6IP4,ABCB9	58,28,108	T0_vsT18
chr12:108980219-108980220	cg13495442	0.46867	16.3741	7.03144e-05	0.0518296	1	0	.		T0_vsT18
chr1:32986209-32986210	cg09637762	0.0869317	16.3664	7.05817e-05	0.0519721	0	0	RP1-27O5.3	47	T0_vsT18
chr12:69201772-69201773	cg05085337	0.0502214	16.3633	7.0689e-05	0.0519721	0	0	MDM2	37	T0_vsT18
chr19:55987993-55987994	cg13579672	0.0431589	16.365	7.06318e-05	0.0519721	0	0	CTD-2537I9.16,ZNF628	13,27	T0_vsT18
chr1:234614740-234614741	cg08479688	0.0365226	16.358	7.08772e-05	0.0520263	0	0	TARBP1	38	T0_vsT18
chr18:268031-268032	cg21288778	0.034194	16.3578	7.08837e-05	0.0520263	0	0	RP11-705O1.8,THOC1	13,16	T0_vsT18
chr2:89157929-89157930	cg02631651	0.169914	16.3483	7.12145e-05	0.0522246	0	0	IGKC,AC096579.7,AC096579.13	4,25,27	T0_vsT18
chr1:12043512-12043513	cg09216381	0.903668	16.3372	7.16063e-05	0.05227	0	0	MFN2	30	T0_vsT18
chr1:227938158-227938159	cg09955595	0.853474	16.3365	7.16301e-05	0.05227	0	0	SNAP47	81	T0_vsT18
chr3:138313386-138313387	cg15872672	0.100693	16.3439	7.13713e-05	0.05227	0	0	CEP70	21	T0_vsT18
chr3:160116838-160116839	cg24494008	0.0532658	16.3366	7.16268e-05	0.05227	0	0	SMC4,RP11-432B6.3,IFT80	48,83,40	T0_vsT18
chr14:68141779-68141780	cg03882923	0.034581	16.3364	7.16366e-05	0.05227	0	0	VTI1B,RP11-1012A1.4	27,29	T0_vsT18
chr17:18266897-18266898	cg15878471	0.0335389	16.3345	7.17018e-05	0.05227	0	0	SHMT1	31	T0_vsT18
chr22:45706060-45706061	cg23015157	0.0532677	16.3357	7.16603e-05	0.05227	0	0	FAM118A	46	T0_vsT18
chr1:1851542-1851543	cg09859491	0.882112	16.3288	7.19028e-05	0.0522734	0	0	TMEM52	25	T0_vsT18
chr8:23104037-23104038	cg00140501	0.0304599	16.3293	7.18873e-05	0.0522734	0	0	CHMP7	29	T0_vsT18
chr8:42911308-42911309	cg02617361	0.0363896	16.3295	7.18807e-05	0.0522734	0	0	RP11-598P20.5,FNTA	29,27	T0_vsT18
chr9:125027051-125027052	cg22168943	0.0283463	16.3258	7.20103e-05	0.0522734	0	0	RBM18,MRRF	26,30	T0_vsT18
chr12:120663296-120663297	cg27019901	0.697872	16.3261	7.19996e-05	0.0522734	0	0	PXN	78	T0_vsT18
chr8:9651400-9651401	cg13505736	0.393763	16.3236	7.20896e-05	0.0522869	0	1	.		T0_vsT18
chr2:233766212-233766213	cg17449416	0.746947	16.301	7.28973e-05	0.0525624	0	0	NGEF	101	T0_vsT18
chr7:74071886-74071887	cg14764329	0.0557736	16.3035	7.28092e-05	0.0525624	0	0	GTF2I	27	T0_vsT18
chr9:131218544-131218545	cg24529616	0.0345139	16.3089	7.26156e-05	0.0525624	0	0	ODF2	37	T0_vsT18
chr10:60094879-60094880	cg06077733	0.0298685	16.3037	7.27994e-05	0.0525624	0	0	UBE2D1	25	T0_vsT18
chr11:1374860-1374861	cg08226723	0.830402	16.3075	7.26641e-05	0.0525624	0	0	.		T0_vsT18
chr19:1095376-1095377	cg08298679	0.0495419	16.3085	7.26281e-05	0.0525624	0	0	POLR2E	21	T0_vsT18
chr20:30865478-30865479	cg00260888	0.0935776	16.3025	7.28449e-05	0.0525624	0	0	KIF3B	31	T0_vsT18
chr7:100471062-100471063	cg24624520	0.885539	16.295	7.31153e-05	0.0526755	0	0	TRIP6	21	T0_vsT18
chr3:49044985-49044986	cg18393022	0.116886	16.2879	7.33699e-05	0.0527114	0	0	WDR6	23	T0_vsT18
chr3:197676815-197676816	cg10130344	0.0851454	16.2886	7.33471e-05	0.0527114	0	0	RPL35A,IQCG	17,56	T0_vsT18
chr7:87505479-87505480	cg08838806	0.175694	16.2838	7.35214e-05	0.0527114	0	0	SLC25A40,DBF4	25,24	T0_vsT18
chr16:67515103-67515104	cg04619838	0.0323388	16.2846	7.34917e-05	0.0527114	0	0	RP11-297D21.4,ATP6V0D1	27,45	T0_vsT18
chr19:3985548-3985549	cg10761845	0.167588	16.2865	7.34217e-05	0.0527114	0	0	EEF2	37	T0_vsT18
chr19:40971959-40971960	cg08204131	0.0973863	16.2834	7.35328e-05	0.0527114	0	0	BLVRB,SPTBN4	23,95	T0_vsT18
chr19:3062217-3062218	cg24809037	0.0439224	16.2792	7.36883e-05	0.0527788	0	0	AES	18	T0_vsT18
chr4:186389465-186389466	cg07221855	0.772356	16.2733	7.39015e-05	0.0528726	0	0	CCDC110	21	T0_vsT18
chr14:103059038-103059039	cg20234266	0.0281237	16.2722	7.3942e-05	0.0528726	0	0	RCOR1	51	T0_vsT18
chr19:54694407-54694408	cg11940876	0.112793	16.2698	7.40307e-05	0.052892	0	0	TSEN34,MBOAT7	32,43	T0_vsT18
chr2:130939680-130939681	cg10534310	0.0372071	16.2661	7.41638e-05	0.0529431	0	0	SMPD4,MZT2B,AC018804.1	35,24,10	T0_vsT18
chr16:56815704-56815705	cg21706537	0.923672	16.2589	7.44296e-05	0.0530888	0	0	NUP93	58	T0_vsT18
chr1:25559209-25559210	cg16245510	0.0537649	16.2502	7.47495e-05	0.053142	0	0	SYF2	17	T0_vsT18
chr9:139780977-139780978	cg17292885	0.0617397	16.2502	7.47513e-05	0.053142	0	0	MIR4479,TRAF2	7,41	T0_vsT18
chr12:56510361-56510362	cg20985486	0.0407355	16.2524	7.46704e-05	0.053142	0	0	RPL41	18	T0_vsT18
chr12:76961847-76961848	cg05074032	0.836796	16.2539	7.46134e-05	0.053142	0	0	RP11-20E24.1	12	T0_vsT18
chr21:15135145-15135146	cg11939992	0.583398	16.2484	7.48166e-05	0.0531445	0	1	FEM1AP1	6	T0_vsT18
chr19:50004152-50004153	cg18374625	0.0996834	16.241	7.50911e-05	0.0532955	0	0	MIR150,hsa-mir-150	6,5	T0_vsT18
chr15:41198725-41198726	cg22509054	0.0919972	16.2356	7.5291e-05	0.0533933	0	0	RP11-540O11.1	7	T0_vsT18
chr9:102669115-102669116	cg03950009	0.0979646	16.2338	7.5359e-05	0.0533975	0	0	RP11-60I3.5,STX17	12,22	T0_vsT18
chr3:15135889-15135890	cg02023149	0.475633	16.2261	7.5645e-05	0.053556	0	0	ZFYVE20	25	T0_vsT18
chr1:43207143-43207144	cg11947084	0.753588	16.219	7.59092e-05	0.053604	0	0	CLDN19	16	T0_vsT18
chr6:10385392-10385393	cg09415754	0.412657	16.2148	7.60694e-05	0.053604	0	0	.		T0_vsT18
chr6:64345855-64345856	cg23091255	0.0364837	16.2143	7.60866e-05	0.053604	0	0	PHF3	38	T0_vsT18
chr17:4167203-4167204	cg04133023	0.0499388	16.2207	7.58462e-05	0.053604	0	0	ANKFY1	79	T0_vsT18
chr19:18942500-18942501	cg12292808	0.0643609	16.2165	7.60031e-05	0.053604	0	0	UPF1	36	T0_vsT18
chr21:35014044-35014045	cg01204964	0.28483	16.2177	7.59603e-05	0.053604	0	0	AP000304.12,CRYZL1,ITSN1	119,39,82	T0_vsT18
chr1:33430450-33430451	cg08635130	0.181625	16.2061	7.63964e-05	0.0537395	0	0	RNF19B	27	T0_vsT18
chr15:76603787-76603788	cg23029100	0.037695	16.2049	7.64396e-05	0.0537395	0	0	ETFA	34	T0_vsT18
chr19:17186517-17186518	cg13424330	0.153398	16.2042	7.64664e-05	0.0537395	1	0	HAUS8,MYO9B	20,98	T0_vsT18
chr2:241760829-241760830	cg06861572	0.0564199	16.1976	7.67184e-05	0.0537848	0	0	KIF1A	72	T0_vsT18
chr12:109028356-109028357	cg17291826	0.0765619	16.1981	7.66974e-05	0.0537848	0	0	RP11-689B22.2,SELPLG	25,21	T0_vsT18
chr14:24036688-24036689	cg09771000	0.140468	16.2009	7.65943e-05	0.0537848	0	0	AP1G2,RP11-66N24.3	33,29	T0_vsT18
chr4:110267632-110267633	cg01008097	0.56668	16.1959	7.67822e-05	0.0537856	0	1	RBMXP4	2	T0_vsT18
chr1:204485540-204485541	cg22249160	0.0410066	16.1821	7.7307e-05	0.0539582	0	0	MDM4	30	T0_vsT18
chr2:38152292-38152293	cg01417569	0.031379	16.1841	7.72307e-05	0.0539582	0	0	RMDN2	55	T0_vsT18
chr2:219264279-219264280	cg15631290	0.100128	16.1795	7.74049e-05	0.0539582	0	0	RP11-378A13.2,CTDSP1	15,38	T0_vsT18
chr3:142443250-142443251	cg20563131	0.0648067	16.1808	7.73572e-05	0.0539582	0	0	TRPC1	26	T0_vsT18
chr5:122759147-122759148	cg09048433	0.0412806	16.1797	7.73986e-05	0.0539582	0	0	CEP120	30	T0_vsT18
chr19:531225-531226	cg14423541	0.0352711	16.1877	7.7092e-05	0.0539582	0	0	CDC34	24	T0_vsT18
chr1:35545182-35545183	cg04576042	0.0981098	16.1753	7.75663e-05	0.0539832	0	0	ZMYM1	31	T0_vsT18
chr19:3761509-3761510	cg11854791	0.133263	16.1759	7.75448e-05	0.0539832	0	0	APBA3,MRPL54	27,24	T0_vsT18
chr3:52739975-52739976	cg08690200	0.0341749	16.1714	7.77189e-05	0.0540021	0	0	GLT8D1,SPCS1	36,28	T0_vsT18
chr8:13305666-13305667	cg10071496	0.84355	16.1715	7.77143e-05	0.0540021	0	0	DLC1	138	T0_vsT18
chr6:41516946-41516947	cg02992176	0.888917	16.1647	7.79744e-05	0.0540922	0	0	RP11-328M4.2,FOXP4	57,58	T0_vsT18
chr13:114898371-114898372	cg02010527	0.0433553	16.1649	7.79665e-05	0.0540922	0	0	RASA3	362	T0_vsT18
chr16:88921167-88921168	cg09417925	0.295861	16.1589	7.81971e-05	0.054203	0	0	TRAPPC2L,GALNS	25,84	T0_vsT18
chr1:43824605-43824606	cg13305312	0.0508786	16.1546	7.83653e-05	0.0542322	0	0	RP1-92O14.3,CDC20	17,19	T0_vsT18
chr3:28282967-28282968	cg20270775	0.0371521	16.1555	7.83289e-05	0.0542322	0	0	CMC1	26	T0_vsT18
chr9:139137959-139137960	cg03838597	0.0713574	16.1485	7.86031e-05	0.0543094	0	0	QSOX2	44	T0_vsT18
chr11:64645556-64645557	cg11015505	0.120466	16.1489	7.85881e-05	0.0543094	0	0	EHD1	66	T0_vsT18
chr1:9712687-9712688	cg01666040	0.0362802	16.1307	7.9295e-05	0.0543939	0	0	PIK3CD,C1orf200	85,12	T0_vsT18
chr1:70671309-70671310	cg23267042	0.0801552	16.1291	7.93577e-05	0.0543939	0	0	SRSF11,LRRC40	44,23	T0_vsT18
chr3:101546814-101546815	cg14769570	0.0951264	16.1333	7.9195e-05	0.0543939	0	0	NXPE3,NFKBIZ	52,36	T0_vsT18
chr7:100887705-100887706	cg10550971	0.0437731	16.1303	7.93107e-05	0.0543939	0	0	FIS1	39	T0_vsT18
chr8:38424297-38424298	cg12047204	0.879828	16.1427	7.88267e-05	0.0543939	0	0	.		T0_vsT18
chr11:3013653-3013654	cg26843469	0.0573466	16.1366	7.90646e-05	0.0543939	0	0	NAP1L4	75	T0_vsT18
chr13:21750645-21750646	cg07431429	0.0818166	16.134	7.91672e-05	0.0543939	0	0	MRP63,SKA3	22,28	T0_vsT18
chr16:66586649-66586650	cg06014631	0.0964372	16.1365	7.90694e-05	0.0543939	0	0	CKLF,CKLF-CMTM1,TK2	32,47,66	T0_vsT18
chr17:38444149-38444150	cg25202618	0.127698	16.1347	7.91394e-05	0.0543939	0	0	CDC6	22	T0_vsT18
chr17:79269488-79269489	cg20994084	0.0270068	16.1339	7.91714e-05	0.0543939	0	0	SLC38A10	105	T0_vsT18
chr20:32783099-32783100	cg20637737	0.846096	16.1268	7.94496e-05	0.0544135	0	0	ASIP	29	T0_vsT18
chr1:203598330-203598331	cg27173151	0.0430941	16.1237	7.95703e-05	0.0544528	0	0	ATP2B4	73	T0_vsT18
chr3:49824184-49824185	cg08584430	0.0599934	16.1169	7.98407e-05	0.0544825	0	0	IP6K1	30	T0_vsT18
chr4:42154296-42154297	cg00869122	0.148288	16.1162	7.9867e-05	0.0544825	0	0	BEND4	27	T0_vsT18
chr4:85414016-85414017	cg08474859	0.430639	16.119	7.97579e-05	0.0544825	0	0	NKX6-1	33	T0_vsT18
chr17:4797531-4797532	cg25212213	0.816681	16.1191	7.9751e-05	0.0544825	0	0	MINK1	49	T0_vsT18
chr1:28969075-28969076	cg20656058	0.486235	16.1073	8.02177e-05	0.0546351	0	1	RP11-442N24__B.1,TAF12	26,44	T0_vsT18
chr8:99938701-99938702	cg11385042	0.839032	16.1077	8.02042e-05	0.0546351	0	0	STK3	135	T0_vsT18
chr3:185303959-185303960	cg26545834	0.0888905	16.0986	8.05631e-05	0.0548269	0	0	SENP2	24	T0_vsT18
chr1:209815452-209815453	cg20148334	0.671096	16.0954	8.0694e-05	0.0548292	0	0	LAMB3	32	T0_vsT18
chr17:66083395-66083396	cg24301534	0.396641	16.0964	8.06536e-05	0.0548292	0	1	.		T0_vsT18
chr17:74137522-74137523	cg12872889	0.105513	16.0898	8.09166e-05	0.0549371	0	0	FOXJ1,RNF157-AS1	19,18	T0_vsT18
chr6:28979498-28979499	cg25579583	0.587952	16.0869	8.10308e-05	0.0549712	0	0	.		T0_vsT18
chr2:109335870-109335871	cg15175104	0.0348769	16.0842	8.11403e-05	0.0550021	0	1	RANBP2	22	T0_vsT18
chr1:189194949-189194950	cg17489999	0.626405	16.079	8.13507e-05	0.0551013	0	1	.		T0_vsT18
chr17:8022237-8022238	cg12199378	0.104079	16.0734	8.15735e-05	0.0552088	0	0	ALOXE3	40	T0_vsT18
chr22:30783470-30783471	cg02383325	0.105531	16.0699	8.17171e-05	0.0552625	0	0	RNF215	52	T0_vsT18
chr6:170123135-170123136	cg08540840	0.0719986	16.0671	8.18314e-05	0.0552963	0	0	PHF10	16	T0_vsT18
chr1:40840193-40840194	cg17908818	0.101453	16.0632	8.19892e-05	0.0553595	0	0	SMAP2	43	T0_vsT18
chr14:105962171-105962172	cg18591945	0.855574	16.0547	8.23335e-05	0.0555048	0	0	C14orf80	41	T0_vsT18
chr19:17336907-17336908	cg04746699	0.0679901	16.0554	8.23057e-05	0.0555048	1	0	OCEL1	16	T0_vsT18
chr17:5015123-5015124	cg25673211	0.0672191	16.053	8.24006e-05	0.0555065	0	0	ZNF232,AC012146.7	39,15	T0_vsT18
chr2:27258494-27258495	cg13315471	0.623134	16.0499	8.25268e-05	0.0555393	0	0	TMEM214	21	T0_vsT18
chr3:9994105-9994106	cg21746851	0.046455	16.0487	8.25784e-05	0.0555393	0	0	PRRT3,PRRT3-AS1	25,25	T0_vsT18
chr16:30466524-30466525	cg16264724	0.872055	16.0466	8.26632e-05	0.0555529	0	0	Y_RNA	1	T0_vsT18
chr1:152011357-152011358	cg11576590	0.488403	16.0263	8.34979e-05	0.0558634	0	0	NBPF18P,S100A11	47,29	T0_vsT18
chr9:134152531-134152532	cg12998491	0.0355898	16.0243	8.35798e-05	0.0558634	0	0	FAM78A	23	T0_vsT18
chr10:129845903-129845904	cg02955484	0.0568116	16.0278	8.34348e-05	0.0558634	1	0	PTPRE	102	T0_vsT18
chr12:7060257-7060258	cg14311559	0.0967098	16.0286	8.34039e-05	0.0558634	0	0	PTPN6	31	T0_vsT18
chr17:79863576-79863577	cg26197468	0.871681	16.0305	8.33236e-05	0.0558634	0	0	PCYT2	44	T0_vsT18
chr19:49977910-49977911	cg22015691	0.0914618	16.0251	8.35476e-05	0.0558634	0	0	CTD-3148I10.9,FLT3LG,CTD-3148I10.15	31,18,29	T0_vsT18
chr20:33945626-33945627	cg01620416	0.410209	16.0317	8.32729e-05	0.0558634	0	0	UQCC1	41	T0_vsT18
chr12:6602556-6602557	cg12660026	0.120483	16.0226	8.36506e-05	0.0558673	0	0	MRPL51,NCAPD2	22,49	T0_vsT18
chr1:109254098-109254099	cg18792689	0.86299	16.0191	8.37965e-05	0.055878	0	0	FNDC7	19	T0_vsT18
chr8:98655248-98655249	cg20549229	0.661302	16.0192	8.3792e-05	0.055878	0	0	MTDH	26	T0_vsT18
chr1:26856265-26856266	cg18912783	0.0824243	16.0106	8.41484e-05	0.0560504	0	0	RPS6KA1	52	T0_vsT18
chr1:110949893-110949894	cg07206840	0.0453649	16.0097	8.41854e-05	0.0560504	0	0	LAMTOR5,LAMTOR5-AS1	21,39	T0_vsT18
chr17:28618902-28618903	cg17698999	0.0371906	16.0069	8.4302e-05	0.0560846	0	0	BLMH	20	T0_vsT18
chr3:13139833-13139834	cg19211209	0.91044	16.0019	8.45125e-05	0.0561743	0	0	.		T0_vsT18
chr8:51469395-51469396	ch.8.1136903F	0.0671026	15.9983	8.46636e-05	0.0561743	0	0	SNTG1	68	T0_vsT18
chr12:51157540-51157541	cg14833382	0.0355173	16.0004	8.45725e-05	0.0561743	0	0	ATF1	27	T0_vsT18
chr17:65989313-65989314	cg02287093	0.0859262	15.9974	8.4698e-05	0.0561743	0	0	C17orf58	7	T0_vsT18
chr16:65897409-65897410	ch.16.1427106R	0.0683737	15.9943	8.48281e-05	0.0562172	0	0	RP11-513N24.1	3	T0_vsT18
chr19:42386962-42386963	cg03050522	0.111342	15.9881	8.50887e-05	0.0563235	0	0	ARHGEF1	54	T0_vsT18
chr19:51307734-51307735	cg14528525	0.120655	15.9874	8.51194e-05	0.0563235	0	0	C19orf48	34	T0_vsT18
chr4:147443742-147443743	cg15278734	0.0320714	15.982	8.53489e-05	0.056432	0	0	SLC10A7	54	T0_vsT18
chr3:52869307-52869308	cg09354317	0.886922	15.9778	8.55257e-05	0.056462	0	0	MUSTN1,RP5-966M1.6,TMEM110-MUSTN1	15,40,65	T0_vsT18
chr16:76606775-76606776	cg20648869	0.746313	15.9782	8.5507e-05	0.056462	0	0	RP11-58C22.1	17	T0_vsT18
chr20:45986862-45986863	cg02807220	0.605167	15.9667	8.59955e-05	0.0567287	0	0	ZMYND8	77	T0_vsT18
chr22:32029943-32029944	cg21171978	0.194335	15.9559	8.64586e-05	0.0569905	0	0	PISD	55	T0_vsT18
chr16:58080289-58080290	cg05517218	0.682486	15.9518	8.66314e-05	0.0570606	0	0	MMP15	44	T0_vsT18
chr16:50308058-50308059	cg26974880	0.0834313	15.9492	8.67439e-05	0.057091	0	0	ADCY7	62	T0_vsT18
chr12:42719888-42719889	cg13513797	0.0666242	15.9355	8.73336e-05	0.0574352	0	0	ZCRB1,PPHLN1	18,85	T0_vsT18
chr6:31628639-31628640	cg16842485	0.0540218	15.9295	8.75947e-05	0.0575629	0	0	C6orf47	43	T0_vsT18
chr22:39770556-39770557	cg15621988	0.866044	15.9255	8.77691e-05	0.0576335	0	0	SYNGR1	41	T0_vsT18
chr14:96968737-96968738	cg18530766	0.0773787	15.9198	8.80165e-05	0.0577518	0	0	RP11-872J21.3,PAPOLA	18,34	T0_vsT18
chr1:226568309-226568310	cg19624601	0.879748	15.9174	8.8119e-05	0.057775	0	0	PARP1	41	T0_vsT18
chr6:34416114-34416115	cg05466596	0.8915	15.9146	8.8242e-05	0.0578116	0	0	.		T0_vsT18
chr5:6605116-6605117	cg16087382	0.906858	15.9101	8.84401e-05	0.0578973	0	0	NSUN2	38	T0_vsT18
chr3:57633157-57633158	cg26165075	0.818103	15.9071	8.85711e-05	0.0579161	0	0	RP11-755B10.2,DENND6A	10,27	T0_vsT18
chr15:82135740-82135741	cg25297453	0.704303	15.9064	8.86034e-05	0.0579161	0	0	RP11-499F3.2	14	T0_vsT18
chr12:93965723-93965724	cg11313694	0.0350543	15.8963	8.90445e-05	0.0581602	0	0	SOCS2-AS1,SOCS2	55,60	T0_vsT18
chr1:233670845-233670846	ch.1.231737468F	0.121336	15.8923	8.92206e-05	0.058231	0	1	.		T0_vsT18
chr4:2420260-2420261	cg19433769	0.0434653	15.8889	8.93728e-05	0.058242	0	0	RP11-503N18.1,ZFYVE28	49181	T0_vsT18
chr12:56862801-56862802	cg21056764	0.060841	15.8895	8.93449e-05	0.058242	0	0	SPRYD4,MIP	20,40	T0_vsT18
chr12:93836052-93836053	cg09181473	0.0244142	15.8842	8.95819e-05	0.058334	0	0	UBE2N	34	T0_vsT18
chr16:31885043-31885044	cg23186116	0.122565	15.8801	8.97637e-05	0.0584082	0	0	ZNF267	23	T0_vsT18
chr12:1059051-1059052	cg03494525	0.0322571	15.8752	8.99797e-05	0.0585045	0	0	RAD52	57	T0_vsT18
chr2:219575482-219575483	cg03488522	0.0324528	15.871	9.01663e-05	0.0585499	0	0	TTLL4	40	T0_vsT18
chr11:45101856-45101857	cg05253500	0.0704954	15.8706	9.01857e-05	0.0585499	0	0	.		T0_vsT18
chr8:144897558-144897559	cg17150465	0.0541551	15.8673	9.03317e-05	0.0585563	0	0	SCRIB	65	T0_vsT18
chr15:80351979-80351980	cg14478806	0.0304857	15.8688	9.02675e-05	0.0585563	0	0	ZFAND6	38	T0_vsT18
chr4:106068604-106068605	cg00911488	0.0659405	15.8603	9.06474e-05	0.0587167	0	0	TET2	39	T0_vsT18
chr7:94286261-94286262	cg27120649	0.481975	15.8533	9.09626e-05	0.0588765	0	0	PEG10,SGCE	104,93	T0_vsT18
chr1:156830415-156830416	cg06655330	0.0905633	15.8501	9.11076e-05	0.0588818	0	0	NTRK1	84	T0_vsT18
chr2:97303837-97303838	cg18192945	0.0473171	15.8509	9.10695e-05	0.0588818	0	0	KANSL3	42	T0_vsT18
chr2:201935987-201935988	cg04514983	0.0688664	15.8482	9.11907e-05	0.0588827	0	0	NDUFB3,FAM126B	24,32	T0_vsT18
chr19:42381214-42381215	cg11624309	0.234436	15.847	9.12458e-05	0.0588827	0	0	CD79A	11	T0_vsT18
chr7:112023776-112023777	cg20400733	0.302749	15.8435	9.14066e-05	0.0589422	1	0	AC004112.4	20	T0_vsT18
chr3:186578967-186578968	cg22898021	0.876504	15.8389	9.16119e-05	0.0590303	0	0	.		T0_vsT18
chr12:53473407-53473408	cg21265568	0.045451	15.8341	9.18316e-05	0.0591276	0	0	SPRYD3	24	T0_vsT18
chr4:927552-927553	cg00230407	0.887721	15.8321	9.19212e-05	0.059141	0	0	TMEM175,GAK	55187	T0_vsT18
chr6:155595675-155595676	cg10082398	0.865491	15.8289	9.20665e-05	0.0591902	0	0	CLDN20,TFB1M	11,35	T0_vsT18
chr3:186648242-186648243	cg15019810	0.107738	15.825	9.22476e-05	0.0592284	0	0	ST6GAL1	73	T0_vsT18
chr16:69807290-69807291	cg02034890	0.620462	15.8246	9.22637e-05	0.0592284	0	1	WWP2	113	T0_vsT18
chr4:83812518-83812519	cg16144348	0.034935	15.8197	9.24901e-05	0.0592853	0	0	SEC31A	55	T0_vsT18
chr6:31733434-31733435	cg11627902	0.797317	15.821	9.24298e-05	0.0592853	0	0	SAPCD1-AS1,VWA7	22,66	T0_vsT18
chr20:8375030-8375031	cg05672540	0.34279	15.8142	9.27421e-05	0.0594026	0	0	PLCB1	99	T0_vsT18
chr11:46143993-46143994	cg10739684	0.14366	15.8007	9.33637e-05	0.0596864	0	0	PHF21A	64	T0_vsT18
chr12:57472765-57472766	cg05679836	0.0797455	15.8001	9.33934e-05	0.0596864	1	0	TMEM194A	38	T0_vsT18
chr14:105958792-105958793	cg14118465	0.860365	15.8026	9.32736e-05	0.0596864	0	0	C14orf80	41	T0_vsT18
chr22:19974846-19974847	cg04754403	0.0924353	15.7982	9.34786e-05	0.0596965	0	0	ARVCF	51	T0_vsT18
chr16:67876020-67876021	cg05625024	0.0613466	15.7958	9.35883e-05	0.0597222	1	0	THAP11,CENPT	19,59	T0_vsT18
chr5:60628376-60628377	cg12489322	0.0340363	15.7878	9.39604e-05	0.0599152	0	0	ZSWIM6	50	T0_vsT18
chr1:55680859-55680860	cg19434783	0.0944175	15.7818	9.42407e-05	0.0599157	0	0	USP24	38	T0_vsT18
chr8:59321176-59321177	cg26325734	0.911467	15.7849	9.40995e-05	0.0599157	0	0	.		T0_vsT18
chr11:65268100-65268101	cg04073608	0.079205	15.7808	9.42884e-05	0.0599157	0	0	MALAT1	21	T0_vsT18
chr13:21141330-21141331	cg19665289	0.0573814	15.7804	9.43093e-05	0.0599157	0	0	IFT88	33	T0_vsT18
chr14:105303134-105303135	cg13797019	0.78839	15.784	9.41375e-05	0.0599157	0	1	RPS2P4	2	T0_vsT18
chr19:44576270-44576271	cg24771266	0.0855974	15.7754	9.45401e-05	0.0600179	0	0	ZNF284,ZNF223	19,14	T0_vsT18
chr1:39492095-39492096	cg11396951	0.0593833	15.7733	9.46399e-05	0.060037	0	0	NDUFS5	14	T0_vsT18
chr1:46713301-46713302	cg24325883	0.0792234	15.7687	9.48538e-05	0.0601074	0	0	RAD54L	21	T0_vsT18
chr8:10696639-10696640	cg12033043	0.055248	15.768	9.48906e-05	0.0601074	0	0	PINX1,RP11-177H2.2,SOX7,SOX7	53,14,96,96	T0_vsT18
chr1:204485384-204485385	cg21015791	0.0760364	15.7641	9.50744e-05	0.0601633	0	0	MDM4	30	T0_vsT18
chr19:797342-797343	cg17667988	0.247711	15.7631	9.51188e-05	0.0601633	0	0	PTBP1	35	T0_vsT18
chr9:96792946-96792947	cg07943683	0.0863927	15.7606	9.52383e-05	0.0601946	0	0	PTPDC1	25	T0_vsT18
chr1:23495430-23495431	cg11333835	0.0873987	15.7542	9.55378e-05	0.0603397	0	0	LUZP1	55	T0_vsT18
chr16:30409261-30409262	cg08959230	0.720952	15.7477	9.58476e-05	0.0604023	0	0	ZNF48	58	T0_vsT18
chr16:30960301-30960302	cg02815900	0.115282	15.7484	9.58149e-05	0.0604023	0	0	AC135048.13,ORAI3	21,19	T0_vsT18
chr17:73471673-73471674	cg00020864	0.872885	15.7488	9.57955e-05	0.0604023	0	0	KIAA0195	38	T0_vsT18
chr19:39897500-39897501	cg09513133	0.124813	15.743	9.60694e-05	0.0604977	0	0	ZFP36	12	T0_vsT18
chr7:27105698-27105699	cg13839616	0.913148	15.74	9.6215e-05	0.0605451	0	0	.		T0_vsT18
chr11:696194-696195	cg06726763	0.0591447	15.7352	9.64452e-05	0.0606456	0	0	EPS8L2,TMEM80,DEAF1	73,31,96	T0_vsT18
chr9:140149498-140149499	cg06002245	0.0513308	15.732	9.65946e-05	0.0606951	0	0	NELFB	22	T0_vsT18
chr14:91977240-91977241	cg01561368	0.0489872	15.7297	9.67064e-05	0.0607141	0	0	SMEK1	39	T0_vsT18
chr22:29941323-29941324	cg05105632	0.581684	15.7285	9.6766e-05	0.0607141	0	1	THOC5	29	T0_vsT18
chr6:116989978-116989979	cg21995682	0.0478763	15.7222	9.70659e-05	0.0608579	0	0	ZUFSP	13	T0_vsT18
chr22:51109466-51109467	cg02862454	0.775107	15.7201	9.71688e-05	0.060878	0	0	.		T0_vsT18
chr13:53392255-53392256	cg20606340	0.784509	15.7139	9.74657e-05	0.0610196	0	1	.		T0_vsT18
chr7:100026348-100026349	cg04118005	0.0501379	15.7088	9.77156e-05	0.0610428	0	0	MEPCE,ZCWPW1	34,40	T0_vsT18
chr12:66216880-66216881	cg05481991	0.0633821	15.7106	9.76276e-05	0.0610428	0	0	RPSAP52,HMGA2	31,87	T0_vsT18
chr17:56408688-56408689	cg15035143	0.0826981	15.7091	9.77019e-05	0.0610428	0	0	MIR142,BZRAP1-AS1	10,69	T0_vsT18
chr8:133030774-133030775	ch.8.133099956F	0.0517688	15.7056	9.78687e-05	0.0610705	0	0	.		T0_vsT18
chr9:99212341-99212342	cg25698371	0.0293436	15.7035	9.7973e-05	0.0610705	0	0	HABP4	22	T0_vsT18
chr19:18633253-18633254	cg23639993	0.0449785	15.7037	9.79595e-05	0.0610705	0	0	ELL	68	T0_vsT18
chr1:53103294-53103295	cg12527995	0.0692944	15.6954	9.83654e-05	0.0612707	0	0	FAM159A	19	T0_vsT18
chr4:184705523-184705524	cg09068039	0.473683	15.6912	9.85694e-05	0.0613521	0	0	.		T0_vsT18
chr21:46293563-46293564	cg12121965	0.0439548	15.6898	9.86387e-05	0.0613521	0	0	PTTG1IP	41	T0_vsT18
chr11:73587730-73587731	cg21151543	0.0475462	15.6872	9.87651e-05	0.0613864	0	0	COA4,PAAF1	20,31	T0_vsT18
chr17:49230788-49230789	cg15660466	0.0629943	15.6828	9.89818e-05	0.0614766	0	0	NME1,NME1-NME2,NME2	22,50,50	T0_vsT18
chr2:24346237-24346238	cg04076037	0.0554987	15.6766	9.92851e-05	0.0616205	0	0	PFN4,FAM228B,RP11-507M3.1	19,67,41	T0_vsT18
chr8:145137364-145137365	cg03822932	0.0578456	15.6718	9.95232e-05	0.0617238	0	0	GPAA1	22	T0_vsT18
chr2:118943906-118943907	cg04747308	0.0940842	15.6655	9.98326e-05	0.0618711	0	0	AC093901.1	16	T0_vsT18
chr5:176561096-176561097	cg00166635	0.0542003	32.5727	8.69505e-08	0.0747957	0	0	NSD1	44	T0_vsT18_LC
chr18:60291892-60291893	cg04546923	0.87863	32.2554	9.88295e-08	0.0850141	0	0	.		T0_vsT18_LF
chr1:567312-567313	cg05001044	0.275385	29.3972	3.17578e-07	0.136592	0	1	hsa-mir-6723,RP5-857K21.7,RP5-857K21.4	14,11,25	T0_vsT18_LC
chr2:219264279-219264280	cg15631290	0.102014	27.0613	8.40642e-07	0.15025	0	0	RP11-378A13.2,CTDSP1	15,38	T0_vsT18_LC
chr7:559675-559676	cg14017435	0.045521	26.9706	8.73335e-07	0.15025	0	0	AC147651.3,PDGFA	26,56	T0_vsT18_LC
chr20:30795610-30795611	cg25987077	0.064264	27.6802	6.48397e-07	0.15025	0	0	PLAGL2,POFUT1	23,28	T0_vsT18_LC
chr1:203317913-203317914	cg12488895	0.787924	25.8639	1.39442e-06	0.152942	0	0	FMOD	24	T0_vsT18_LC
chr4:77322647-77322648	cg09091771	0.895861	25.8172	1.42236e-06	0.152942	0	0	RP11-356M17.1,SNORD50,CCDC158	3,2,34	T0_vsT18_LC
chr9:140009395-140009396	cg23999861	0.0588207	26.2419	1.18791e-06	0.152942	0	0	DPP7	15	T0_vsT18_LC
chr7:81637024-81637025	cg12536527	0.899499	25.3778	1.71485e-06	0.160831	0	0	MIR1255B1,CACNA2D1	9,77	T0_vsT18_LC
chr9:139440791-139440792	cg04271687	0.0517386	24.9524	2.05664e-06	0.160831	0	0	MIR4674,NOTCH1,RP11-611D20.2	5,89,14	T0_vsT18_LC
chr19:45645622-45645623	cg04513316	0.872174	25.1165	1.91721e-06	0.160831	1	0	MARK4,PPP1R37	196,50	T0_vsT18_LC
chr1:564504-564505	cg22519184	0.379484	23.5815	3.71031e-06	0.195463	0	0	RP5-857K21.5,MTND1P23,MTND2P28,RP5-857K21.4	6,3,6,25	T0_vsT18_LC
chr1:1243460-1243461	cg15042692	0.0508461	23.9983	3.09864e-06	0.195463	0	0	ACAP3,PUSL1	60,26	T0_vsT18_LC
chr2:130939362-130939363	cg20150163	0.0491541	24.1583	2.89214e-06	0.195463	0	0	SMPD4,MZT2B	35,24	T0_vsT18_LC
chr3:10052900-10052901	cg27297753	0.112567	23.3315	4.1348e-06	0.195463	0	0	AC022007.5,EMC3	17,44	T0_vsT18_LC
chr4:3443025-3443026	cg27636612	0.824152	22.626	5.62054e-06	0.195463	0	0	HGFAC	29	T0_vsT18_LC
chr6:33422403-33422404	cg02322621	0.0636159	22.652	5.55711e-06	0.195463	0	0	ZBTB9	58	T0_vsT18_LC
chr7:72722951-72722952	cg01251255	0.042965	22.5119	5.90789e-06	0.195463	0	1	NSUN5	21	T0_vsT18_LC
chr10:120925325-120925326	cg18395988	0.0528065	23.1952	4.38681e-06	0.195463	0	0	SFXN4	23	T0_vsT18_LC
chr12:7000179-7000180	cg06456878	0.0580225	22.517	5.89453e-06	0.195463	0	0	LRRC23	66	T0_vsT18_LC
chr13:42846648-42846649	cg08791849	0.0874947	22.8839	5.02287e-06	0.195463	0	0	AKAP11	22	T0_vsT18_LC
chr14:73925212-73925213	cg09968817	0.204275	22.9512	4.87789e-06	0.195463	0	0	NUMB	70	T0_vsT18_LC
chr16:2265388-2265389	cg09096612	0.0431097	22.8824	5.02617e-06	0.195463	0	0	PGP	20	T0_vsT18_LC
chr17:73391422-73391423	cg07027472	0.919697	22.6793	5.49149e-06	0.195463	0	0	GRB2	65	T0_vsT18_LC
chr19:49971665-49971666	cg22334548	0.859766	22.81	5.18712e-06	0.195463	0	0	ALDH16A1,CTD-3148I10.9	31,31	T0_vsT18_LC
chr22:45706060-45706061	cg23015157	0.0548823	23.1746	4.42619e-06	0.195463	0	0	FAM118A	46	T0_vsT18_LC
chr19:1592887-1592888	cg12286540	0.0861844	22.2714	6.56318e-06	0.2091	0	0	MBD3,UQCR11	35,18	T0_vsT18_LC
chr2:187454613-187454614	cg08368441	0.0817931	25.6787	1.5086e-06	0.213099	0	0	ITGAV	26	T0_vsT18_LF
chr3:49967065-49967066	cg20162159	0.0565322	24.6198	2.37162e-06	0.213099	0	0	MON1A	27	T0_vsT18_LF
chr4:39978799-39978800	cg15003695	0.12155	27.3209	7.53769e-07	0.213099	0	0	PDS5A	35	T0_vsT18_LF
chr10:43932620-43932621	cg09608028	0.538183	26.1716	1.2238e-06	0.213099	0	1	ZNF487	24	T0_vsT18_LF
chr10:69611755-69611756	cg04100124	0.399562	24.5183	2.47729e-06	0.213099	0	0	.		T0_vsT18_LF
chr12:19088662-19088663	cg16064364	0.86434	25.0138	2.00329e-06	0.213099	0	0	.		T0_vsT18_LF
chr19:18529969-18529970	cg00281080	0.0722456	25.8583	1.39772e-06	0.213099	0	0	SSBP4	25	T0_vsT18_LF
chr19:46172501-46172502	cg27657862	0.236158	24.5343	2.46028e-06	0.213099	0	0	GIPR	37	T0_vsT18_LF
chr19:49063796-49063797	cg08363693	0.869481	26.9275	8.89328e-07	0.213099	0	0	SULT2B1	37	T0_vsT18_LF
chr11:1888965-1888966	cg03314009	0.86922	30.268	8.89091e-07	0.21479	0	0	LSP1	2	T0_vsT18_LFno
chr12:120933482-120933483	cg18168387	0.0607837	31.8464	5.23769e-07	0.21479	0	0	DYNLL1,DYNLL1-AS1	40,16	T0_vsT18_LFno
chr16:67224629-67224630	cg00942293	0.814813	29.925	9.98781e-07	0.21479	0	0	E2F4,EXOC3L1	21,21	T0_vsT18_LFno
chr16:90072702-90072703	cg02191970	0.842614	32.8755	3.72923e-07	0.21479	0	0	DBNDD1	30	T0_vsT18_LFno
chr17:8090696-8090697	cg06487191	0.0814201	21.9718	7.4845e-06	0.229937	0	0	.		T0_vsT18_LC
chr10:96084493-96084494	cg02929526	0.834905	21.8521	7.88824e-06	0.233984	0	0	PLCE1,NOC3L	91,27	T0_vsT18_LC
chr7:66205334-66205335	cg25203256	0.0730342	21.7459	8.2654e-06	0.236999	0	1	RP11-792A8.4,KCTD7,RABGEF1	11,95,62	T0_vsT18_LC
chr1:16533434-16533435	cg01719793	0.0730866	21.5855	8.86998e-06	0.238552	0	0	ARHGEF19	27	T0_vsT18_LC
chr2:170681546-170681547	cg08785459	0.0644951	21.5473	9.02076e-06	0.238552	0	0	METTL5	21	T0_vsT18_LC
chr14:23266959-23266960	cg12744976	0.426967	21.4735	9.31901e-06	0.238552	0	0	SLC7A7	62	T0_vsT18_LC
chr22:19974846-19974847	cg04754403	0.0952045	21.4469	9.42884e-06	0.238552	0	0	ARVCF	51	T0_vsT18_LC
chr5:166130870-166130871	ch.5.3135990F	0.0826239	21.3172	9.98426e-06	0.238571	0	0	.		T0_vsT18_LC
chr10:6019609-6019610	cg08676905	0.104713	21.3189	9.97677e-06	0.238571	0	0	IL15RA	34	T0_vsT18_LC
chr7:211714-211715	ch.7.8314F	0.0812394	23.5044	3.83618e-06	0.238961	0	0	FAM20C	100	T0_vsT18_LF
chr11:32338313-32338314	cg05034271	0.934029	23.4728	3.88911e-06	0.238961	0	0	RP1-65P5.1	42	T0_vsT18_LF
chr11:46141386-46141387	cg16480966	0.0227949	23.7326	3.47539e-06	0.238961	0	0	PHF21A	64	T0_vsT18_LF
chr19:47690096-47690097	cg07338787	0.607171	23.7472	3.45366e-06	0.238961	0	0	SAE1	43	T0_vsT18_LF
chr5:54034095-54034096	cg24640736	0.386097	21.2239	1.04046e-05	0.239	0	0	.		T0_vsT18_LC
chr11:122874364-122874365	cg26537719	0.876805	21.1481	1.0759e-05	0.239	0	0	.		T0_vsT18_LC
chr18:43547530-43547531	cg15317173	0.0407519	21.1321	1.08357e-05	0.239	0	0	EPG5	34	T0_vsT18_LC
chr12:57928259-57928260	cg16237618	0.93138	20.7632	1.27594e-05	0.274395	0	0	DCTN2	31	T0_vsT18_LC
chr17:46669492-46669493	cg12744859	0.62435	20.6046	1.36903e-05	0.280394	0	0	HOXB5,HOXB3,HOXB-AS3	30208210	T0_vsT18_LC
chr18:71815246-71815247	cg16378950	0.0806633	20.6171	1.36146e-05	0.280394	1	0	TIMM21,FBXO15	21,31	T0_vsT18_LC
chr19:1941705-1941706	cg12364882	0.123288	22.8999	4.98789e-06	0.286042	0	0	CSNK1G2	71	T0_vsT18_LF
chr5:141704698-141704699	cg14506320	0.113454	20.1456	1.67959e-05	0.289542	0	0	SPRY4,AC005592.2	28124	T0_vsT18_LC
chr11:125439230-125439231	cg25456515	0.0333272	20.1865	1.64919e-05	0.289542	0	0	EI24	20	T0_vsT18_LC
chr12:1100388-1100389	cg08285180	0.0536408	20.062	1.74348e-05	0.289542	0	0	RP11-359B12.2,ERC1,RAD52	21,117,57	T0_vsT18_LC
chr15:37387438-37387439	cg15902390	0.219403	20.3663	1.52217e-05	0.289542	0	0	MEIS2	110	T0_vsT18_LC
chr16:89724451-89724452	cg21864071	0.0827852	20.0532	1.75029e-05	0.289542	0	0	CHMP1A,SPATA33	35,28	T0_vsT18_LC
chr17:79935490-79935491	cg21631606	0.0547217	20.2176	1.62648e-05	0.289542	0	0	ASPSCR1	79	T0_vsT18_LC
chr19:10678015-10678016	cg06865036	0.752199	20.4196	1.48648e-05	0.289542	0	0	CDKN2D,KRI1	16,29	T0_vsT18_LC
chr19:18316102-18316103	cg10681125	0.0345995	20.1138	1.70361e-05	0.289542	0	0	RAB3A,AC068499.10	19,26	T0_vsT18_LC
chr19:33919073-33919074	cg04514467	0.93861	20.1223	1.6971e-05	0.289542	0	0	PEPD	69	T0_vsT18_LC
chr19:42463694-42463695	cg05886952	0.0908836	20.3349	1.54361e-05	0.289542	0	0	RABAC1	14	T0_vsT18_LC
chr1:564504-564505	cg22519184	0.38211	20.1843	1.65083e-05	0.28975	0	0	RP5-857K21.5,MTND1P23,MTND2P28,RP5-857K21.4	6,3,6,25	T0_vsT18_LF
chr1:567312-567313	cg05001044	0.292637	20.6885	1.31896e-05	0.28975	0	1	hsa-mir-6723,RP5-857K21.7,RP5-857K21.4	14,11,25	T0_vsT18_LF
chr1:29096136-29096137	cg17424822	0.553801	22.6998	5.44243e-06	0.28975	0	1	YTHDF2	31	T0_vsT18_LF
chr1:32795007-32795008	cg17243548	0.844024	20.6822	1.32264e-05	0.28975	0	0	HDAC1	37	T0_vsT18_LF
chr1:45452476-45452477	cg05331230	0.0637536	19.5335	2.20888e-05	0.28975	0	0	EIF2B3	33	T0_vsT18_LF
chr1:53732274-53732275	cg03619182	0.830457	19.4764	2.26627e-05	0.28975	0	0	RP4-784A16.1,LRP8	3,71	T0_vsT18_LF
chr1:82268649-82268650	cg04226724	0.185585	21.2562	1.02569e-05	0.28975	0	0	LPHN2	118	T0_vsT18_LF
chr2:85190234-85190235	cg15026799	0.912161	21.0522	1.12257e-05	0.28975	0	0	.		T0_vsT18_LF
chr2:140975034-140975035	cg03506134	0.74258	21.1963	1.05322e-05	0.28975	0	1	AC092156.3	1	T0_vsT18_LF
chr3:13358223-13358224	cg12444628	0.891612	21.7808	8.13968e-06	0.28975	0	0	NUP210	60	T0_vsT18_LF
chr4:109684291-109684292	cg13618906	0.126996	19.5435	2.19902e-05	0.28975	0	0	ETNPPL	19	T0_vsT18_LF
chr4:125384961-125384962	cg14567203	0.63985	20.6216	1.35872e-05	0.28975	0	1	TECRP2	1	T0_vsT18_LF
chr5:203645-203646	cg26361216	0.906871	19.5539	2.18872e-05	0.28975	0	0	CCDC127	43	T0_vsT18_LF
chr5:176863265-176863266	cg27497299	0.895711	20.328	1.54834e-05	0.28975	0	0	GRK6	63	T0_vsT18_LF
chr6:30421566-30421567	cg13903409	0.168479	20.2617	1.59478e-05	0.28975	0	0	.		T0_vsT18_LF
chr6:32158153-32158154	cg09028157	0.104678	20.9265	1.18681e-05	0.28975	0	0	PBX2	46	T0_vsT18_LF
chr7:23525412-23525413	cg07110854	0.849702	20.3632	1.52424e-05	0.28975	0	0	.		T0_vsT18_LF
chr7:75472763-75472764	cg22824450	0.590423	21.159	1.07075e-05	0.28975	0	1	RHBDD2	33	T0_vsT18_LF
chr7:75974205-75974206	cg08278784	0.814056	19.6165	2.12819e-05	0.28975	0	0	YWHAG	39	T0_vsT18_LF
chr7:84569394-84569395	cg13253945	0.443828	21.499	9.2147e-06	0.28975	0	1	AC074183.4	7	T0_vsT18_LF
chr7:130352914-130352915	cg26702875	0.0749076	19.5813	2.16205e-05	0.28975	0	0	COPG2	32	T0_vsT18_LF
chr8:28243953-28243954	cg19139277	0.0889236	19.5684	2.17462e-05	0.28975	0	0	ZNF395,FBXO16	58112	T0_vsT18_LF
chr8:112053356-112053357	cg14230692	0.945175	19.5141	2.22823e-05	0.28975	0	0	.		T0_vsT18_LF
chr9:131266982-131266983	cg22545525	0.0601769	20.4518	1.4653e-05	0.28975	0	0	GLE1	16	T0_vsT18_LF
chr9:139137959-139137960	cg03838597	0.0708493	19.9959	1.7957e-05	0.28975	0	0	QSOX2	44	T0_vsT18_LF
chr10:131568811-131568812	cg12496783	0.903305	21.5525	9.00008e-06	0.28975	1	0	.		T0_vsT18_LF
chr11:61560366-61560367	cg07583651	0.0759632	20.2675	1.59071e-05	0.28975	0	0	MIR611,FEN1,TMEM258,FADS2	16,26,47,117	T0_vsT18_LF
chr11:79114296-79114297	cg17233829	0.920478	21.6086	8.78031e-06	0.28975	0	0	MIR708,TENM4	4237	T0_vsT18_LF
chr14:65194515-65194516	cg14697542	0.927467	19.4527	2.29049e-05	0.28975	0	0	PLEKHG3	63	T0_vsT18_LF
chr14:89290489-89290490	cg11899804	0.215772	22.1526	6.91372e-06	0.28975	0	0	TTC8	35	T0_vsT18_LF
chr14:96829025-96829026	cg27419346	0.0534379	20.0698	1.73738e-05	0.28975	0	0	ATG2B,GSKIP	46,29	T0_vsT18_LF
chr14:96858394-96858395	cg23201883	0.142835	19.764	1.99204e-05	0.28975	0	0	AK7	45	T0_vsT18_LF
chr14:105679810-105679811	cg05175112	0.747182	21.2958	1.0079e-05	0.28975	0	0	BRF1	165	T0_vsT18_LF
chr15:41625136-41625137	cg25861327	0.062036	19.653	2.09358e-05	0.28975	0	0	OIP5,NUSAP1	21,35	T0_vsT18_LF
chr15:70290586-70290587	cg19788036	0.831375	19.6901	2.05903e-05	0.28975	0	0	.		T0_vsT18_LF
chr16:75322931-75322932	cg17654763	0.774797	20.4842	1.44433e-05	0.28975	0	0	.		T0_vsT18_LF
chr16:89265696-89265697	cg16475404	0.849237	20.2102	1.63184e-05	0.28975	1	0	SLC22A31	20	T0_vsT18_LF
chr16:90072702-90072703	cg02191970	0.837982	20.342	1.53877e-05	0.28975	0	0	DBNDD1	30	T0_vsT18_LF
chr17:1958412-1958413	cg01168201	0.106821	19.6306	2.11477e-05	0.28975	0	0	HIC1	64	T0_vsT18_LF
chr17:39363758-39363759	cg17117697	0.864617	21.4535	9.40138e-06	0.28975	0	0	.		T0_vsT18_LF
chr19:1369238-1369239	cg00512178	0.885006	22.4416	6.09202e-06	0.28975	0	0	MUM1	125	T0_vsT18_LF
chr19:39105043-39105044	cg00131213	0.810826	21.5739	8.91576e-06	0.28975	0	0	MAP4K1	39	T0_vsT18_LF
chr19:41283578-41283579	cg06439809	0.0713801	20.0654	1.74078e-05	0.28975	0	0	MIA-RAB4B,RAB4B,RAB4B-EGLN2	22,22,44	T0_vsT18_LF
chr19:50034644-50034645	cg23199257	0.844165	21.1258	1.08657e-05	0.28975	0	0	RCN3	20	T0_vsT18_LF
chr20:3762116-3762117	cg01087594	0.0687046	20.5944	1.37528e-05	0.28975	0	0	SPEF1	17	T0_vsT18_LF
chr20:3827347-3827348	cg02180766	0.0544335	21.1147	1.09193e-05	0.28975	0	0	MAVS	22	T0_vsT18_LF
chr20:32274559-32274560	cg10704770	0.105813	19.598	2.14591e-05	0.28975	0	0	E2F1	17	T0_vsT18_LF
chr20:32593884-32593885	cg26425547	0.915415	20.7606	1.27743e-05	0.28975	0	0	RALY	50	T0_vsT18_LF
chr20:33891700-33891701	cg12522898	0.0700617	20.3387	1.54098e-05	0.28975	0	0	UQCC1	41	T0_vsT18_LF
chr20:43373100-43373101	cg16501806	0.850134	21.2539	1.02676e-05	0.28975	0	0	KCNK15,RP11-445H22.4	21,60	T0_vsT18_LF
chr22:20851056-20851057	cg09958090	0.0469452	19.7814	1.97652e-05	0.28975	0	0	MED15,KLHL22	92,68	T0_vsT18_LF
chr22:45636890-45636891	cg27393667	0.158374	20.4702	1.45337e-05	0.28975	0	0	KIAA0930	76	T0_vsT18_LF
chr22:50945860-50945861	cg11108982	0.0945612	19.767	1.9893e-05	0.28975	0	0	LMF2,NCAPH2	21,26	T0_vsT18_LF
chr12:12849096-12849097	cg06928346	0.517386	19.3409	2.40856e-05	0.295981	0	0	GPR19	30	T0_vsT18_LF
chr16:1414013-1414014	cg01679473	0.767707	19.3432	2.40608e-05	0.295981	0	0	UNKL	106	T0_vsT18_LF
chr1:110370974-110370975	cg13911530	0.885443	19.8972	1.87673e-05	0.296913	0	0	RP4-735C1.6	11	T0_vsT18_LC
chr13:114898515-114898516	cg27632050	0.114171	19.8715	1.8984e-05	0.296913	0	0	RASA3	362	T0_vsT18_LC
chr19:8570921-8570922	cg24327541	0.0608799	19.8896	1.88307e-05	0.296913	0	0	.		T0_vsT18_LC
chr7:32031547-32031548	cg16074873	0.895066	19.2678	2.48909e-05	0.297381	0	0	PDE1C	114	T0_vsT18_LF
chr13:24790608-24790609	cg20914994	0.923701	19.2983	2.45513e-05	0.297381	0	0	RP11-307N16.6,SPATA13	167150	T0_vsT18_LF
chr12:12876682-12876683	cg13629887	0.136202	19.2037	2.56192e-05	0.297809	0	0	RP11-180M15.4	10	T0_vsT18_LF
chr12:79189766-79189767	ch.12.1596805R	0.0882888	19.2244	2.53819e-05	0.297809	0	0	.		T0_vsT18_LF
chr5:131826458-131826459	cg18890864	0.0555752	19.7811	1.97683e-05	0.298331	0	0	IRF1	21	T0_vsT18_LC
chr19:16607011-16607012	cg01077808	0.0636608	19.8037	1.95694e-05	0.298331	0	0	CALR3,C19orf44,CTD-3222D19.2	19,24,128	T0_vsT18_LC
chr8:51469395-51469396	ch.8.1136903F	0.0647724	28.2845	1.75438e-06	0.301826	0	0	SNTG1	68	T0_vsT18_LFno
chr19:47364695-47364696	cg18041006	0.403756	19.6972	2.05254e-05	0.301829	0	0	.		T0_vsT18_LC
chr20:30865478-30865479	cg00260888	0.0922601	19.6781	2.07018e-05	0.301829	0	0	KIF3B	31	T0_vsT18_LC
chr1:150898663-150898664	cg02060408	0.126595	19.3849	2.36132e-05	0.307762	0	0	SETDB1	21	T0_vsT18_LC
chr2:61404587-61404588	cg17926234	0.113421	19.4871	2.25535e-05	0.307762	0	0	AHSA2	25	T0_vsT18_LC
chr5:79947052-79947053	cg04272309	0.440612	19.4618	2.28117e-05	0.307762	0	1	MTRNR2L2,DHFR	7,30	T0_vsT18_LC
chr6:31624399-31624400	cg23770142	0.86126	19.4286	2.31547e-05	0.307762	0	0	APOM	76	T0_vsT18_LC
chr7:1049120-1049121	cg17724577	0.867094	19.4243	2.31988e-05	0.307762	0	0	C7orf50	359	T0_vsT18_LC
chr13:75196940-75196941	cg06438530	0.87664	19.5892	2.15435e-05	0.307762	0	0	.		T0_vsT18_LC
chr21:35288186-35288187	cg15249164	0.0550748	19.4184	2.32605e-05	0.307762	0	0	ATP5O,LINC00649	22,36	T0_vsT18_LC
chr1:36562653-36562654	cg16520795	0.841761	18.6956	3.22227e-05	0.307856	0	0	COL8A2	30	T0_vsT18_LF
chr1:204381220-204381221	cg05702633	0.100301	18.5689	3.41243e-05	0.307856	0	0	RP11-739N20.2,PPP1R15B	58,22	T0_vsT18_LF
chr2:162243644-162243645	cg22784247	0.902037	18.5896	3.38067e-05	0.307856	0	0	PSMD14	34	T0_vsT18_LF
chr3:52291169-52291170	cg04104820	0.621142	18.7214	3.1848e-05	0.307856	0	0	WDR82	54	T0_vsT18_LF
chr4:25780875-25780876	cg05134786	0.906926	18.7635	3.12479e-05	0.307856	0	0	SEL1L3	50	T0_vsT18_LF
chr4:110355680-110355681	cg01427435	0.0421108	18.7268	3.17714e-05	0.307856	0	0	SEC24B-AS1,SEC24B	23,21	T0_vsT18_LF
chr5:162883763-162883764	cg22183057	0.918458	18.5568	3.43125e-05	0.307856	0	0	NUDCD2	25	T0_vsT18_LF
chr6:32085092-32085093	cg18278744	0.869883	18.8791	2.96575e-05	0.307856	0	0	ATF6B	150	T0_vsT18_LF
chr6:37322641-37322642	cg08393660	0.139894	18.7235	3.18177e-05	0.307856	0	0	RNF8	23	T0_vsT18_LF
chr6:107349292-107349293	cg05445051	0.0430668	18.667	3.26417e-05	0.307856	0	0	C6orf203	21	T0_vsT18_LF
chr6:144869815-144869816	cg15904590	0.899806	18.5704	3.41015e-05	0.307856	0	0	UTRN	132	T0_vsT18_LF
chr7:1220036-1220037	cg12190521	0.848436	18.7819	3.09889e-05	0.307856	0	0	.		T0_vsT18_LF
chr7:64023434-64023435	cg10988062	0.090244	18.5917	3.37744e-05	0.307856	0	0	ZNF680	15	T0_vsT18_LF
chr12:30848710-30848711	cg25943131	0.124643	18.8628	2.98763e-05	0.307856	0	0	IPO8	24	T0_vsT18_LF
chr12:106485363-106485364	cg12528483	0.848756	18.5619	3.42331e-05	0.307856	0	0	NUAK1	65	T0_vsT18_LF
chr13:78493583-78493584	cg26022015	0.215609	18.7133	3.19653e-05	0.307856	0	0	EDNRB,RNF219-AS1	50172	T0_vsT18_LF
chr17:72856064-72856065	cg17354190	0.0370849	18.5539	3.43569e-05	0.307856	0	0	GRIN2C	32	T0_vsT18_LF
chr17:77085322-77085323	ch.17.74596917R	0.0771059	18.9005	2.93724e-05	0.307856	0	0	.		T0_vsT18_LF
chr19:10928172-10928173	cg27648270	0.911401	18.8588	2.99311e-05	0.307856	0	0	MIR199A1,DNM2	9,78	T0_vsT18_LF
chr19:18529985-18529986	cg09126419	0.0800587	18.9054	2.93076e-05	0.307856	0	0	SSBP4	25	T0_vsT18_LF
chr19:18920396-18920397	cg11299264	0.163505	19.0393	2.75893e-05	0.307856	0	0	.		T0_vsT18_LF
chr19:37957995-37957996	cg14142713	0.0643317	18.7683	3.11798e-05	0.307856	0	0	ZNF569,ZNF570	34,28	T0_vsT18_LF
chr6:31627273-31627274	cg10442445	0.87985	18.5121	3.50148e-05	0.30813	0	0	C6orf47,C6orf47-AS1	43,36	T0_vsT18_LF
chr19:1117571-1117572	cg05919982	0.881445	18.5064	3.5104e-05	0.30813	0	0	SBNO2	101	T0_vsT18_LF
chr3:5230340-5230341	cg07748036	0.0781145	18.4573	3.58955e-05	0.308777	0	0	AC026202.1,AC026202.3,EDEM1	9,26,30	T0_vsT18_LF
chr10:18948272-18948273	cg19874323	0.109584	18.4663	3.57491e-05	0.308777	0	0	ARL5B-AS1,ARL5B	30,21	T0_vsT18_LF
chr22:37235922-37235923	cg02891746	0.123538	18.4034	3.67829e-05	0.313277	0	0	.		T0_vsT18_LF
chr9:36487138-36487139	cg22952469	0.0365295	18.3023	3.85114e-05	0.316676	0	0	RNF38	34	T0_vsT18_LF
chr14:50087093-50087094	cg01797567	0.0674809	18.2941	3.86545e-05	0.316676	0	0	MGAT2,RPL36AL	19,21	T0_vsT18_LF
chr19:16239180-16239181	ch.19.683370F	0.0836955	18.3265	3.809e-05	0.316676	0	0	RAB8A,CTD-2231E14.8	36,15	T0_vsT18_LF
chr20:35488024-35488025	cg01599925	0.856969	18.304	3.84809e-05	0.316676	0	0	SOGA1	86	T0_vsT18_LF
chr1:1239259-1239260	cg09556527	0.756726	19.1494	2.62536e-05	0.317031	0	0	ACAP3	60	T0_vsT18_LC
chr1:3448190-3448191	cg06577272	0.0864552	18.7065	3.20639e-05	0.317031	0	0	MEGF6	157	T0_vsT18_LC
chr1:205601265-205601266	cg06391610	0.0318692	18.7546	3.1374e-05	0.317031	0	0	ELK4	19	T0_vsT18_LC
chr2:153347526-153347527	cg26207245	0.868339	19.1078	2.67501e-05	0.317031	0	0	FMNL2	114	T0_vsT18_LC
chr4:76598477-76598478	cg01331554	0.036205	18.8715	2.97589e-05	0.317031	0	0	G3BP2	60	T0_vsT18_LC
chr4:141051792-141051793	cg00487979	0.876622	19.1315	2.64658e-05	0.317031	0	0	RP11-392B6.1,MAML3	6180	T0_vsT18_LC
chr5:148724853-148724854	cg22725986	0.0415744	18.7842	3.09566e-05	0.317031	0	0	GRPEL2	17	T0_vsT18_LC
chr6:27264271-27264272	cg26069919	0.23048	18.9487	2.874e-05	0.317031	0	0	POM121L2	41	T0_vsT18_LC
chr7:5530946-5530947	cg03378525	0.864128	19.0472	2.74904e-05	0.317031	0	0	FBXL18	104	T0_vsT18_LC
chr7:56019566-56019567	cg07870486	0.0791119	18.8108	3.05867e-05	0.317031	0	0	MRPS17,GBAS,MRPS17	14,38,14	T0_vsT18_LC
chr7:103086748-103086749	cg26475547	0.153429	18.7656	3.1218e-05	0.317031	0	0	SLC26A5,CTB-107G13.1	37,30	T0_vsT18_LC
chr11:57258314-57258315	cg13567345	0.931341	18.8435	3.01378e-05	0.317031	0	0	SLC43A1	50	T0_vsT18_LC
chr11:67205869-67205870	cg16408081	0.631149	19.244	2.51591e-05	0.317031	0	0	PTPRCAP,CORO1B	19,41	T0_vsT18_LC
chr11:114130575-114130576	cg17344999	0.760915	18.8774	2.96798e-05	0.317031	0	0	RP11-64D24.2,NNMT	74,37	T0_vsT18_LC
chr13:113922076-113922077	cg11176835	0.886145	18.7175	3.19044e-05	0.317031	0	0	.		T0_vsT18_LC
chr15:44719311-44719312	cg10956385	0.112198	18.8149	3.05307e-05	0.317031	0	0	CTDSPL2,RP11-516C1.1	31,18	T0_vsT18_LC
chr16:11442491-11442492	cg15683687	0.914188	18.929	2.89963e-05	0.317031	0	0	RP11-485G7.6,AC009121.1,RMI2	8,4,144	T0_vsT18_LC
chr16:89574615-89574616	cg05671791	0.073194	19.2059	2.55941e-05	0.317031	0	0	SPG7	136	T0_vsT18_LC
chr17:36862199-36862200	cg01485645	0.259557	19.0203	2.78267e-05	0.317031	0	0	CTB-58E17.3,MLLT6	17,34	T0_vsT18_LC
chr17:41489472-41489473	cg17249845	0.899333	18.8549	2.99837e-05	0.317031	0	0	RNU6-470P	4	T0_vsT18_LC
chr17:79633652-79633653	cg22471020	0.0693577	19.0782	2.71088e-05	0.317031	0	0	OXLD1,CCDC137	25,31	T0_vsT18_LC
chr3:150690157-150690158	cg16534154	0.840216	18.1137	4.19572e-05	0.319455	0	0	CLRN1,CLRN1-AS1,RP11-166N6.2	25,59,54	T0_vsT18_LF
chr9:115139282-115139283	cg17112037	0.902594	18.1346	4.15608e-05	0.319455	1	0	.		T0_vsT18_LF
chr11:47663666-47663667	cg25152200	0.144419	18.2391	3.9633e-05	0.319455	0	0	MTCH2	26	T0_vsT18_LF
chr11:67799551-67799552	cg26703857	0.786474	18.0103	4.39798e-05	0.319455	0	0	NDUFS8	28	T0_vsT18_LF
chr11:118661172-118661173	cg19039771	0.0871496	17.9947	4.42936e-05	0.319455	0	0	DDX6	20	T0_vsT18_LF
chr12:133004845-133004846	cg26572905	0.844305	18.159	4.11018e-05	0.319455	0	0	.		T0_vsT18_LF
chr14:22471278-22471279	cg03490014	0.171366	18.0261	4.36647e-05	0.319455	0	0	TRAV18	5	T0_vsT18_LF
chr15:70147186-70147187	cg08002500	0.313218	17.965	4.48969e-05	0.319455	0	0	.		T0_vsT18_LF
chr16:76269409-76269410	cg07649992	0.731093	18.0361	4.34671e-05	0.319455	0	1	RPL18P13,RP11-150D5.2	6,12	T0_vsT18_LF
chr17:44954192-44954193	cg06830692	0.905299	18.0301	4.35848e-05	0.319455	0	0	WNT9B	49	T0_vsT18_LF
chr17:48152797-48152798	cg03828668	0.82038	18.1083	4.20616e-05	0.319455	0	0	ITGA3	36	T0_vsT18_LF
chr19:12599448-12599449	cg14088693	0.877226	17.992	4.43478e-05	0.319455	0	0	ZNF709,ZNF709	61,61	T0_vsT18_LF
chr19:13262402-13262403	cg11316754	0.0544809	17.9631	4.49356e-05	0.319455	0	0	STX10,IER2	20,28	T0_vsT18_LF
chr19:17496990-17496991	cg18303555	0.0508281	18.1926	4.04785e-05	0.319455	0	0	.		T0_vsT18_LF
chr19:38834464-38834465	cg18661607	0.843086	18.1726	4.08486e-05	0.319455	0	0	CATSPERG	38	T0_vsT18_LF
chr19:49375508-49375509	cg16264781	0.0801449	18.1606	4.10724e-05	0.319455	0	0	PPP1R15A	13	T0_vsT18_LF
chr15:96875703-96875704	cg09738906	0.417717	18.6616	3.27221e-05	0.319862	0	1	MIR1469,NR2F2	17,64	T0_vsT18_LC
chr8:145202751-145202752	cg25593776	0.0601102	18.5633	3.42108e-05	0.326397	0	1	MROH1	55	T0_vsT18_LC
chr14:51555158-51555159	cg11727826	0.764743	18.5331	3.46819e-05	0.326397	0	0	RP11-1140I5.1,TRIM9	3,51	T0_vsT18_LC
chr14:97324828-97324829	cg24663378	0.89087	18.5188	3.49084e-05	0.326397	0	0	VRK1	56	T0_vsT18_LC
chr17:22020759-22020760	cg11212901	0.755519	18.5761	3.40131e-05	0.326397	0	0	.		T0_vsT18_LC
chr7:30652139-30652140	cg09351960	0.913784	18.4799	3.55292e-05	0.32863	0	0	GARS	39	T0_vsT18_LC
chr1:53099053-53099054	cg11279444	0.211103	18.4467	3.60674e-05	0.330059	0	0	FAM159A	19	T0_vsT18_LC
chr7:130131258-130131259	cg13917504	0.54306	18.4104	3.6667e-05	0.332014	0	0	MEST	90	T0_vsT18_LC
chr17:50113310-50113311	ch.17.1364760R	0.0584724	18.3847	3.7096e-05	0.3324	0	0	CA10	76	T0_vsT18_LC
chr6:127837030-127837031	cg11010178	0.449539	17.8297	4.7754e-05	0.333905	0	0	SOGA3,SOGA3	66,66	T0_vsT18_LF
chr8:49804177-49804178	cg00413838	0.923477	17.8223	4.79148e-05	0.333905	0	0	.		T0_vsT18_LF
chr12:133257248-133257249	cg04185565	0.919818	17.8124	4.81327e-05	0.333905	0	0	POLE	92	T0_vsT18_LF
chr11:94706000-94706001	cg02648738	0.0597968	17.7858	4.87193e-05	0.335271	0	0	CWC15,KDM4D	22,26	T0_vsT18_LF
chr1:156084516-156084517	cg04317543	0.0880395	17.7223	5.01543e-05	0.338415	0	0	LMNA	82	T0_vsT18_LF
chr7:128116561-128116562	cg03080344	0.114256	17.7336	4.98949e-05	0.338415	0	1	RP11-212P7.3,METTL2B	40,18	T0_vsT18_LF
chr10:8277523-8277524	cg00017363	0.951539	17.7135	5.03565e-05	0.338415	0	0	.		T0_vsT18_LF
chr6:157394950-157394951	cg04306184	0.518401	18.2992	3.85649e-05	0.33851	0	0	ARID1B	202	T0_vsT18_LC
chr20:35402306-35402307	cg12601032	0.1014	18.2997	3.85568e-05	0.33851	0	0	DSN1	27	T0_vsT18_LC
chr1:54951511-54951512	cg10703691	0.122063	17.6712	5.13369e-05	0.339997	0	0	.		T0_vsT18_LF
chr16:89265361-89265362	cg23719837	0.764143	17.6693	5.13823e-05	0.339997	0	0	SLC22A31	20	T0_vsT18_LF
chr19:39826668-39826669	cg09569432	0.0938522	17.6523	5.17835e-05	0.340036	0	0	GMFG	23	T0_vsT18_LF
chr10:97099776-97099777	cg12853418	0.899832	18.2455	3.95176e-05	0.341268	0	0	SORBS1	121	T0_vsT18_LC
chr19:1020733-1020734	cg20147100	0.105298	18.2369	3.96726e-05	0.341268	0	0	RNU6-2,TMEM259	6,27	T0_vsT18_LC
chr1:1851542-1851543	cg09859491	0.883538	17.5738	5.36769e-05	0.341587	0	0	TMEM52	25	T0_vsT18_LF
chr1:204485540-204485541	cg22249160	0.0433274	17.6215	5.25177e-05	0.341587	0	0	MDM4	30	T0_vsT18_LF
chr2:62082097-62082098	cg00622580	0.0632731	17.5757	5.3628e-05	0.341587	0	0	FAM161A	16	T0_vsT18_LF
chr6:32155079-32155080	cg10608731	0.593827	17.5604	5.40053e-05	0.341587	0	1	PBX2,XXbac-BPG300A18.13	46,16	T0_vsT18_LF
chr8:144897305-144897306	cg07422311	0.0581064	17.5837	5.34344e-05	0.341587	0	0	SCRIB	65	T0_vsT18_LF
chr1:151447362-151447363	cg02603733	0.918721	18.1988	4.03657e-05	0.341854	0	0	.		T0_vsT18_LC
chr4:57844912-57844913	cg09569258	0.0316355	18.1895	4.05356e-05	0.341854	0	0	NOA1,POLR2B	27,42	T0_vsT18_LC
chr17:7405958-7405959	cg17016524	0.866572	26.9349	2.8134e-06	0.342206	0	0	POLR2A	50	T0_vsT18_LFno
chr19:1369238-1369239	cg00512178	0.887954	26.5864	3.18253e-06	0.342206	0	0	MUM1	125	T0_vsT18_LFno
chr21:16380394-16380395	cg24654737	0.905417	27.065	2.68725e-06	0.342206	0	0	NRIP1	45	T0_vsT18_LFno
chr1:16563727-16563728	cg22391883	0.034903	17.5228	5.49431e-05	0.343323	0	0	RSG1	13	T0_vsT18_LF
chr10:135098942-135098943	cg04447323	0.899055	17.5174	5.5078e-05	0.343323	0	0	TUBGCP2	107	T0_vsT18_LF
chr1:100715467-100715468	cg23062876	0.0675857	17.4974	5.55855e-05	0.343994	0	0	DBT	21	T0_vsT18_LF
chr11:120621722-120621723	cg22548751	0.916536	18.122	4.17989e-05	0.345729	0	0	GRIK4	189	T0_vsT18_LC
chr17:43090472-43090473	cg03706109	0.876802	18.1312	4.1625e-05	0.345729	0	0	.		T0_vsT18_LC
chr20:30413750-30413751	cg18024538	0.759961	17.4666	5.63757e-05	0.346393	0	0	MYLK2	29	T0_vsT18_LF
chr1:65613405-65613406	cg21570528	0.0631492	17.4442	5.69552e-05	0.347471	0	0	AK4	50	T0_vsT18_LF
chr7:73097886-73097887	cg12099727	0.0585484	18.0786	4.26336e-05	0.347565	0	0	DNAJC30,WBSCR22	21,40	T0_vsT18_LC
chr17:67542788-67542789	cg05508455	0.8869	18.0685	4.2829e-05	0.347565	1	0	.		T0_vsT18_LC
chr4:54232368-54232369	cg25061071	0.0605987	17.4113	5.78197e-05	0.347812	0	0	SCFD2	84	T0_vsT18_LF
chr14:100849941-100849942	cg07470960	0.903011	17.4204	5.75814e-05	0.347812	0	0	WDR25	106	T0_vsT18_LF
chr1:1285214-1285215	cg05115545	0.0476824	16.7903	7.69176e-05	0.348415	0	0	DVL1	28	T0_vsT18_LF
chr1:24285641-24285642	cg15741766	0.0746531	16.9948	7.00058e-05	0.348415	0	0	PNRC2,CNR2	21,63	T0_vsT18_LF
chr1:28879858-28879859	cg10691259	0.0632823	17.3868	5.84743e-05	0.348415	0	0	TRNAU1AP	16	T0_vsT18_LF
chr1:149900705-149900706	cg25913923	0.921963	17.1721	6.45262e-05	0.348415	0	0	MTMR11,SF3B4	21,16	T0_vsT18_LF
chr1:155247191-155247192	cg11911250	0.157397	17.0893	6.70277e-05	0.348415	0	0	CLK2,HCN3	51,29	T0_vsT18_LF
chr1:165620027-165620028	cg15622113	0.922879	16.9129	7.26957e-05	0.348415	0	0	MGST3	31	T0_vsT18_LF
chr1:200963729-200963730	cg27481821	0.87386	16.8679	7.42182e-05	0.348415	0	0	KIF21B	50	T0_vsT18_LF
chr1:203317913-203317914	cg12488895	0.790417	16.9617	7.10799e-05	0.348415	0	0	FMOD	24	T0_vsT18_LF
chr1:241683161-241683162	cg06951363	0.0543757	17.0623	6.78663e-05	0.348415	0	0	FH	19	T0_vsT18_LF
chr2:10857880-10857881	cg23893833	0.889572	17.0624	6.78619e-05	0.348415	0	0	AC092687.3	9	T0_vsT18_LF
chr2:29117416-29117417	cg07749079	0.0878555	17.001	6.98041e-05	0.348415	0	0	WDR43	31	T0_vsT18_LF
chr3:25728371-25728372	cg27572068	0.501166	16.8868	7.35747e-05	0.348415	0	0	CRIP1P2	3	T0_vsT18_LF
chr3:42544020-42544021	cg04322483	0.0877233	16.8612	7.44462e-05	0.348415	0	0	VIPR1	60	T0_vsT18_LF
chr4:83932227-83932228	cg00748821	0.0745316	16.7892	7.69567e-05	0.348415	0	0	LIN54	44	T0_vsT18_LF
chr5:4321970-4321971	ch.5.158370R	0.0402624	16.9551	7.12957e-05	0.348415	0	0	.		T0_vsT18_LF
chr5:21814037-21814038	cg26469968	0.692319	17.0628	6.78485e-05	0.348415	0	0	CDH12	54	T0_vsT18_LF
chr6:69865628-69865629	cg08468481	0.792266	17.0629	6.78453e-05	0.348415	0	0	BAI3	55	T0_vsT18_LF
chr6:101674899-101674900	cg10272977	0.459119	16.9514	7.14179e-05	0.348415	0	0	.		T0_vsT18_LF
chr7:75931843-75931844	cg03122505	0.0570987	16.7925	7.68393e-05	0.348415	0	0	HSPB1	16	T0_vsT18_LF
chr7:137367050-137367051	cg05540100	0.767102	17.0085	6.95664e-05	0.348415	0	0	DGKI	84	T0_vsT18_LF
chr8:101734283-101734284	cg05743086	0.0774288	16.825	7.56972e-05	0.348415	0	0	PABPC1	28	T0_vsT18_LF
chr8:146119611-146119612	cg22745570	0.777363	16.8488	7.48736e-05	0.348415	0	0	ZNF250	44	T0_vsT18_LF
chr10:95721442-95721443	cg20431488	0.570616	17.2183	6.31704e-05	0.348415	0	1	PIPSL	8	T0_vsT18_LF
chr12:57472765-57472766	cg05679836	0.0790065	17.3048	6.07138e-05	0.348415	1	0	TMEM194A	38	T0_vsT18_LF
chr12:72667326-72667327	cg09972192	0.316201	17.2644	6.18482e-05	0.348415	0	0	TRHDE-AS1,TRHDE	22,57	T0_vsT18_LF
chr12:112451002-112451003	cg08908102	0.0508281	16.9271	7.22217e-05	0.348415	0	0	TMEM116,ERP29	31,23	T0_vsT18_LF
chr13:27746040-27746041	cg01517521	0.0677863	17.1097	6.64022e-05	0.348415	0	0	USP12-AS2,USP12	16,39	T0_vsT18_LF
chr13:114898371-114898372	cg02010527	0.0441728	16.8447	7.50151e-05	0.348415	0	0	RASA3	362	T0_vsT18_LF
chr14:77924517-77924518	cg24123563	0.0639378	16.8042	7.64265e-05	0.348415	0	0	AHSA1,VIPAS39	27,26	T0_vsT18_LF
chr15:52370282-52370283	cg02278459	0.761596	17.2554	6.2106e-05	0.348415	0	0	CTD-2184D3.5	23	T0_vsT18_LF
chr16:937312-937313	cg05053735	0.885286	17.2516	6.22151e-05	0.348415	1	0	LMF1	288	T0_vsT18_LF
chr16:21610849-21610850	cg19859891	0.0568294	16.8696	7.41598e-05	0.348415	0	0	METTL9	61	T0_vsT18_LF
chr16:56965804-56965805	cg04347867	0.0894502	17.0349	6.87264e-05	0.348415	0	0	HERPUD1	25	T0_vsT18_LF
chr17:2060623-2060624	cg23403980	0.353707	17.3694	5.89411e-05	0.348415	0	0	SMG6	132	T0_vsT18_LF
chr17:40834485-40834486	cg12874243	0.0708336	17.0441	6.8437e-05	0.348415	0	0	CCR10,CNTNAP1	26,38	T0_vsT18_LF
chr17:40897126-40897127	cg03623386	0.0773049	16.9738	7.06837e-05	0.348415	0	0	EZH1	22	T0_vsT18_LF
chr17:53618125-53618126	cg23306510	0.79275	17.1774	6.43687e-05	0.348415	0	0	CTD-2033D24.2	13	T0_vsT18_LF
chr17:73110554-73110555	cg23660755	0.0718939	16.8512	7.47912e-05	0.348415	0	0	ARMC7	24	T0_vsT18_LF
chr17:80206216-80206217	cg16927232	0.867232	17.1177	6.61601e-05	0.348415	0	0	AC132872.1,SLC16A3,CSNK1D	14,109,73	T0_vsT18_LF
chr17:81041756-81041757	cg17487617	0.637942	16.9863	7.02806e-05	0.348415	1	0	METRNL	55	T0_vsT18_LF
chr18:49071992-49071993	cg16892022	0.719608	16.861	7.44542e-05	0.348415	1	0	snoU13,RP11-267C16.1	4,14	T0_vsT18_LF
chr19:15640611-15640612	cg09535567	0.928244	17.0943	6.68746e-05	0.348415	0	0	CYP4F22	34	T0_vsT18_LF
chr19:18210197-18210198	cg07993547	0.152809	17.2103	6.34044e-05	0.348415	0	0	IL12RB1,MAST3	42,63	T0_vsT18_LF
chr19:44079527-44079528	cg01880404	0.0562242	17.0379	6.86298e-05	0.348415	0	0	L34079.4,PINLYP,XRCC1,L34079.2	4,26,38,37	T0_vsT18_LF
chr19:48972844-48972845	cg02239082	0.0477094	17.0072	6.96063e-05	0.348415	0	0	CTC-273B12.5,CTC-273B12.7,CYTH2	19,23,27	T0_vsT18_LF
chr19:56111852-56111853	cg08250364	0.0660458	16.9092	7.28184e-05	0.348415	0	0	FIZ1,ZNF524	28,15	T0_vsT18_LF
chr22:42840795-42840796	cg01565386	0.0395918	17.2645	6.18475e-05	0.348415	0	0	CTA-126B4.7	15	T0_vsT18_LF
chr16:67916349-67916350	cg18926042	0.74601	16.7735	7.75183e-05	0.34912	0	0	CTC-479C5.10,EDC4	22,38	T0_vsT18_LF
chr5:146614393-146614394	cg14801593	0.0617105	16.7243	7.92941e-05	0.349632	0	0	CTC-255N20.1,STK32A	30,27	T0_vsT18_LF
chr6:90539804-90539805	cg18464790	0.095833	16.7298	7.90951e-05	0.349632	0	0	CASP8AP2	20	T0_vsT18_LF
chr10:126392148-126392149	cg05902968	0.912028	16.7346	7.89209e-05	0.349632	0	0	RP11-464O2.2,RP11-12J10.3,FAM53B	12150125	T0_vsT18_LF
chr19:35433853-35433854	cg19703576	0.914174	16.7543	7.82051e-05	0.349632	0	0	ZNF30	16	T0_vsT18_LF
chr20:32081978-32081979	cg06223279	0.89335	16.7143	7.96641e-05	0.349632	0	0	CBFA2T2	62	T0_vsT18_LF
chr6:43021567-43021568	cg01970114	0.0376846	18.0221	4.37443e-05	0.351676	0	0	CUL7,KLC4	30,60	T0_vsT18_LC
chr3:129262026-129262027	cg15606914	0.811438	16.6835	8.08021e-05	0.352422	0	0	H1FOO	13	T0_vsT18_LF
chr6:31926279-31926280	cg11565585	0.0908644	16.675	8.11192e-05	0.352422	0	0	NELFE,SKIV2L	51,81	T0_vsT18_LF
chr9:138437525-138437526	cg01792041	0.826118	16.6549	8.18753e-05	0.353919	1	1	OBP2A	7	T0_vsT18_LF
chr6:31671213-31671214	cg05785394	0.096022	17.9852	4.4486e-05	0.354327	0	0	ABHD16A,XXbac-BPG32J3.20	69,93	T0_vsT18_LC
chr6:110011968-110011969	cg06337230	0.0749486	17.9645	4.49075e-05	0.354403	0	0	AK9,FIG4	45,46	T0_vsT18_LC
chr5:203645-203646	cg26361216	0.909495	26.1545	3.71085e-06	0.354679	0	0	CCDC127	43	T0_vsT18_LFno
chr4:2826347-2826348	cg00891429	0.934948	16.5899	8.43697e-05	0.357949	0	0	SH3BP2	79	T0_vsT18_LF
chr5:79947052-79947053	cg04272309	0.439301	16.5942	8.42044e-05	0.357949	0	1	MTRNR2L2,DHFR	7,30	T0_vsT18_LF
chr20:17935312-17935313	cg27158878	0.922404	16.5873	8.4472e-05	0.357949	0	0	SNX5	42	T0_vsT18_LF
chr21:43483090-43483091	cg18996876	0.0702318	16.6124	8.34999e-05	0.357949	0	0	UMODL1	88	T0_vsT18_LF
chr19:18794247-18794248	cg05501721	0.041063	17.9124	4.5987e-05	0.359623	0	0	CRTC1	76	T0_vsT18_LC
chr5:151138161-151138162	cg21101222	0.0408987	17.8922	4.64115e-05	0.359673	0	0	CTB-113P19.3,ATOX1	25,60	T0_vsT18_LC
chr1:89151226-89151227	cg26777712	0.0357303	16.563	8.54248e-05	0.359968	0	0	PKN2,RP11-76N22.2	36,28	T0_vsT18_LF
chr1:91818587-91818588	cg11119884	0.793694	16.5539	8.57854e-05	0.359968	0	0	HFM1	27	T0_vsT18_LF
chr12:133526522-133526523	cg18754747	0.928768	16.5304	8.67228e-05	0.362135	0	1	ZNF605,CHFR	33196	T0_vsT18_LF
chr1:569687-569688	cg01070250	0.269573	17.2557	6.20976e-05	0.362879	0	1	MTATP6P1,RP5-857K21.11,RP5-857K21.4	6,5,25	T0_vsT18_LC
chr1:1285214-1285215	cg05115545	0.0469636	17.411	5.78288e-05	0.362879	0	0	DVL1	28	T0_vsT18_LC
chr1:23135043-23135044	cg22931642	0.774158	17.693	5.08295e-05	0.362879	0	0	EPHB2	124	T0_vsT18_LC
chr1:62207888-62207889	cg12128740	0.157396	17.2439	6.24336e-05	0.362879	0	0	RP11-430G17.3,INADL	8,76	T0_vsT18_LC
chr1:205180527-205180528	cg13197680	0.0283542	17.536	5.46119e-05	0.362879	0	0	DSTYK	31	T0_vsT18_LC
chr2:65075259-65075260	cg24825180	0.865528	17.2451	6.24004e-05	0.362879	0	0	AC007880.1	17	T0_vsT18_LC
chr3:180040793-180040794	cg06876616	0.823717	17.2843	6.12876e-05	0.362879	0	0	RP11-420J11.1	4	T0_vsT18_LC
chr4:39624311-39624312	cg20193401	0.868912	17.5439	5.44158e-05	0.362879	0	0	SMIM14	44	T0_vsT18_LC
chr4:124698165-124698166	cg20711695	0.856719	17.8517	4.7277e-05	0.362879	0	0	RP11-93L9.1	44	T0_vsT18_LC
chr6:33291363-33291364	cg08567382	0.0332473	17.5672	5.38369e-05	0.362879	0	0	DAXX	96	T0_vsT18_LC
chr6:166419593-166419594	cg08330404	0.248027	17.5424	5.44525e-05	0.362879	0	0	.		T0_vsT18_LC
chr7:6746228-6746229	cg00504951	0.1644	17.2816	6.1362e-05	0.362879	0	0	AC073343.13,ZNF12	45,26	T0_vsT18_LC
chr7:47008980-47008981	cg26441958	0.893344	17.5936	5.31919e-05	0.362879	0	0	AC004901.1,AC004870.4	19,7	T0_vsT18_LC
chr8:23104037-23104038	cg00140501	0.0302406	17.602	5.29869e-05	0.362879	0	0	CHMP7	29	T0_vsT18_LC
chr9:131266982-131266983	cg22545525	0.0593093	17.5984	5.30753e-05	0.362879	0	0	GLE1	16	T0_vsT18_LC
chr9:131476799-131476800	cg00713427	0.81371	17.4993	5.55362e-05	0.362879	0	0	PKN3	19	T0_vsT18_LC
chr9:132565414-132565415	cg25006128	0.0954934	17.4762	5.61272e-05	0.362879	0	0	TOR1B	15	T0_vsT18_LC
chr10:43932620-43932621	cg09608028	0.536831	17.3606	5.91805e-05	0.362879	0	1	ZNF487	24	T0_vsT18_LC
chr10:48414156-48414157	cg16915540	0.790997	17.5989	5.30643e-05	0.362879	0	0	GDF2	23	T0_vsT18_LC
chr10:74151434-74151435	cg16933320	0.882727	17.2786	6.14469e-05	0.362879	0	0	RNU6-805P,MICU1	2,47	T0_vsT18_LC
chr10:105128013-105128014	cg26978691	0.0353707	17.54	5.45132e-05	0.362879	0	0	TAF5	19	T0_vsT18_LC
chr11:11138882-11138883	cg10765777	0.775267	17.4617	5.65019e-05	0.362879	0	0	RP11-179A10.1	16	T0_vsT18_LC
chr12:23207842-23207843	cg18124672	0.875018	17.749	4.95467e-05	0.362879	0	0	RP11-114G22.1	56	T0_vsT18_LC
chr13:55265748-55265749	ch.13.54163749F	0.0357978	17.3698	5.89304e-05	0.362879	0	0	.		T0_vsT18_LC
chr14:105956176-105956177	cg22836535	0.118944	17.3126	6.04966e-05	0.362879	0	0	CRIP1,C14orf80	38,41	T0_vsT18_LC
chr15:66784464-66784465	cg06278080	0.45359	17.5835	5.34376e-05	0.362879	0	0	CTD-3185P2.1,SNAPC5,MAP2K1	4,14,41	T0_vsT18_LC
chr16:14521169-14521170	cg23215084	0.827297	17.2895	6.11403e-05	0.362879	0	1	.		T0_vsT18_LC
chr16:56691849-56691850	cg00005010	0.0795282	17.2786	6.14471e-05	0.362879	0	0	MT1F	14	T0_vsT18_LC
chr17:18163844-18163845	cg17154187	0.0297958	17.6875	5.09582e-05	0.362879	0	0	MIEF2	26	T0_vsT18_LC
chr17:45726749-45726750	cg22751080	0.123285	17.7478	4.95739e-05	0.362879	0	0	RP11-580I16.2,KPNB1	26,33	T0_vsT18_LC
chr18:57514472-57514473	cg08082548	0.80829	17.2577	6.20406e-05	0.362879	0	0	.		T0_vsT18_LC
chr19:4910272-4910273	cg22611064	0.077701	17.4378	5.71237e-05	0.362879	0	0	UHRF1	90	T0_vsT18_LC
chr19:18717779-18717780	cg04039417	0.139255	17.8014	4.83738e-05	0.362879	0	0	CRLF1,TMEM59L	60,34	T0_vsT18_LC
chr20:19892382-19892383	cg24001015	0.876223	17.3279	6.0073e-05	0.362879	0	0	RIN2	68	T0_vsT18_LC
chr21:44313427-44313428	cg23036931	0.0371272	17.5405	5.4499e-05	0.362879	0	0	NDUFV3	42	T0_vsT18_LC
chr22:50945860-50945861	cg11108982	0.0962665	17.5346	5.46477e-05	0.362879	0	0	LMF2,NCAPH2	21,26	T0_vsT18_LC
chr22:50984822-50984823	cg14496081	0.747355	17.3139	6.04603e-05	0.362879	0	0	CTA-384D8.31	12	T0_vsT18_LC
chr1:2479645-2479646	cg04999950	0.061751	16.5141	8.73805e-05	0.363119	0	0	.		T0_vsT18_LF
chr1:228337181-228337182	cg24052475	0.75267	16.444	9.02573e-05	0.36314	0	0	GJC2	19	T0_vsT18_LF
chr1:236508636-236508637	cg12738609	0.895119	16.4173	9.13802e-05	0.36314	0	0	.		T0_vsT18_LF
chr4:173522917-173522918	cg22700577	0.757334	16.4921	8.82746e-05	0.36314	0	0	GALNTL6	83	T0_vsT18_LF
chr5:80597509-80597510	cg17477893	0.0452546	16.4246	9.10747e-05	0.36314	0	0	ZCCHC9,CKMT2-AS1	23,58	T0_vsT18_LF
chr7:2912098-2912099	cg21836121	0.869816	16.3994	9.21425e-05	0.36314	0	0	.		T0_vsT18_LF
chr7:104654995-104654996	cg07095072	0.0735673	16.3615	9.37722e-05	0.36314	0	0	KMT2E-AS1,KMT2E	16,46	T0_vsT18_LF
chr7:139026058-139026059	cg00196167	0.073733	16.3588	9.38911e-05	0.36314	0	0	C7orf55,C7orf55-LUC7L2,LUC7L2	25,62,57	T0_vsT18_LF
chr7:148936883-148936884	cg12695158	0.0811221	16.3699	9.34072e-05	0.36314	0	0	ZNF212	21	T0_vsT18_LF
chr8:145626662-145626663	cg03636657	0.862072	16.3626	9.37222e-05	0.36314	0	0	MIR1234,CPSF1	10,49	T0_vsT18_LF
chr9:214915-214916	cg20229853	0.0554433	16.3242	9.54066e-05	0.36314	0	0	C9orf66,DOCK8	12,52	T0_vsT18_LF
chr10:59866634-59866635	cg20560600	0.763674	16.373	9.32756e-05	0.36314	0	0	RP11-123G9.1	3	T0_vsT18_LF
chr10:80921785-80921786	cg07370745	0.87057	16.3519	9.41908e-05	0.36314	0	0	ZMIZ1	201	T0_vsT18_LF
chr11:67205869-67205870	cg16408081	0.632135	16.4143	9.15072e-05	0.36314	0	0	PTPRCAP,CORO1B	19,41	T0_vsT18_LF
chr12:50794975-50794976	cg18801245	0.0683959	16.4615	8.95315e-05	0.36314	0	0	LARP4	29	T0_vsT18_LF
chr17:1897348-1897349	cg20899146	0.927268	16.4966	8.80903e-05	0.36314	0	0	RTN4RL1	93	T0_vsT18_LF
chr17:40042468-40042469	cg23536730	0.847359	16.3344	9.49548e-05	0.36314	0	0	ACLY	50	T0_vsT18_LF
chr17:43196221-43196222	cg18063493	0.893792	16.3996	9.21317e-05	0.36314	0	0	PLCD3	36	T0_vsT18_LF
chr19:2455899-2455900	cg06941312	0.140967	16.3268	9.52906e-05	0.36314	0	0	LMNB2	62	T0_vsT18_LF
chr22:46692687-46692688	cg22396353	0.0512405	16.4103	9.16792e-05	0.36314	0	0	GTSE1	27	T0_vsT18_LF
chr3:53106869-53106870	cg25751261	0.0735481	16.2828	9.72558e-05	0.367138	0	0	RP11-894J14.5	51	T0_vsT18_LF
chr16:2068942-2068943	cg02407493	0.809341	16.2815	9.73105e-05	0.367138	0	0	NPW	33	T0_vsT18_LF
chr12:19409239-19409240	cg03957984	0.887904	16.2319	9.95771e-05	0.374049	0	0	PLEKHA5	67	T0_vsT18_LF
chr3:49449507-49449508	cg16951854	0.0877481	17.1204	6.60771e-05	0.374473	0	0	TCTA,RHOA	24,40	T0_vsT18_LC
chr4:185306187-185306188	cg25556051	0.809939	17.1578	6.49525e-05	0.374473	0	0	.		T0_vsT18_LC
chr7:944752-944753	cg24335793	0.796071	17.1173	6.61698e-05	0.374473	0	0	ADAP1,COX19	139189	T0_vsT18_LC
chr13:73078698-73078699	cg08354227	0.881782	17.1393	6.55041e-05	0.374473	0	0	.		T0_vsT18_LC
chr1:16175060-16175061	cg05653691	0.0431439	16.832	7.5454e-05	0.376032	0	0	RP11-169K16.9,SPEN	35,69	T0_vsT18_LC
chr1:26758543-26758544	cg21907877	0.0777017	16.9706	7.07894e-05	0.376032	0	0	DHDDS	32	T0_vsT18_LC
chr1:32120996-32120997	cg21369695	0.897301	16.707	7.99312e-05	0.376032	0	0	COL16A1,RP11-73M7.6	57,36	T0_vsT18_LC
chr1:156215655-156215656	cg26022183	0.09503	16.6945	8.03921e-05	0.376032	0	0	PAQR6	19	T0_vsT18_LC
chr1:156834132-156834133	cg21784069	0.898913	17.0435	6.84541e-05	0.376032	0	0	NTRK1	84	T0_vsT18_LC
chr1:184942841-184942842	cg18801893	0.041063	16.8075	7.63123e-05	0.376032	0	0	FAM129A	69	T0_vsT18_LC
chr2:113915885-113915886	cg01175394	0.922081	16.6817	8.08716e-05	0.376032	0	0	PSD4	49	T0_vsT18_LC
chr2:208489448-208489449	cg18750825	0.0548536	16.7015	8.01333e-05	0.376032	0	0	METTL21A	41	T0_vsT18_LC
chr3:12525846-12525847	cg16214179	0.0374297	16.8212	7.58315e-05	0.376032	0	0	TSEN2	45	T0_vsT18_LC
chr4:83934056-83934057	cg19556948	0.110976	16.9015	7.30767e-05	0.376032	0	0	LIN54	44	T0_vsT18_LC
chr5:32585739-32585740	cg15288179	0.033677	16.7169	7.95668e-05	0.376032	0	0	SUB1	38	T0_vsT18_LC
chr6:30710425-30710426	cg24000189	0.0778794	16.7644	7.78439e-05	0.376032	0	0	XXbac-BPG252P9.10,FLOT1	37101	T0_vsT18_LC
chr6:32022542-32022543	cg21624533	0.832873	16.7475	7.84523e-05	0.376032	0	0	TNXB	532	T0_vsT18_LC
chr7:112023776-112023777	cg20400733	0.300378	17.0361	6.86862e-05	0.376032	1	0	AC004112.4	20	T0_vsT18_LC
chr8:21770233-21770234	cg00443121	0.582084	16.9798	7.04907e-05	0.376032	0	0	DOK2	18	T0_vsT18_LC
chr9:131486578-131486579	cg19725675	0.0534406	16.7808	7.72574e-05	0.376032	0	0	ZDHHC12,RP11-545E17.3	15,15	T0_vsT18_LC
chr10:23003653-23003654	cg11965880	0.0340099	16.6968	8.03077e-05	0.376032	0	0	PIP4K2A	97	T0_vsT18_LC
chr10:71078141-71078142	cg02119927	0.0571892	16.7529	7.8256e-05	0.376032	0	0	HK1	83	T0_vsT18_LC
chr10:134499528-134499529	cg00458454	0.960603	16.8339	7.5387e-05	0.376032	0	0	INPP5A	433	T0_vsT18_LC
chr11:910475-910476	cg05773442	0.149579	16.7321	7.90092e-05	0.376032	0	0	CHID1	76	T0_vsT18_LC
chr12:51157540-51157541	cg14833382	0.0360718	16.697	8.03012e-05	0.376032	0	0	ATF1	27	T0_vsT18_LC
chr12:94533932-94533933	cg06781468	0.783017	16.6669	8.14252e-05	0.376032	1	1	RP11-74K11.1	7	T0_vsT18_LC
chr13:107185511-107185512	cg22114393	0.179054	17.0526	6.81693e-05	0.376032	0	0	EFNB2	42	T0_vsT18_LC
chr15:76553926-76553927	cg19259030	0.482993	16.8933	7.33524e-05	0.376032	0	0	TYRO3P,ETFA	7,34	T0_vsT18_LC
chr16:284641-284642	cg21850139	0.0342676	17.0282	6.89378e-05	0.376032	0	0	ITFG3	28	T0_vsT18_LC
chr16:23652610-23652611	cg15645140	0.0328202	16.6584	8.1745e-05	0.376032	0	0	PALB2,DCTN5	29,30	T0_vsT18_LC
chr17:685713-685714	cg23101014	0.0467516	16.9614	7.10907e-05	0.376032	0	0	GLOD4,RNMTL1	41,39	T0_vsT18_LC
chr17:7620948-7620949	cg21734090	0.071668	16.6779	8.1013e-05	0.376032	0	0	DNAH2	80	T0_vsT18_LC
chr17:27046597-27046598	cg19548004	0.0934424	16.9427	7.17021e-05	0.376032	0	0	RAB34,SNORD42B,RPL23A	31,21,47	T0_vsT18_LC
chr17:79400900-79400901	cg25554340	0.61503	16.8413	7.51318e-05	0.376032	0	0	RP11-1055B8.7	127	T0_vsT18_LC
chr19:14640042-14640043	cg11581046	0.0584051	16.8531	7.47259e-05	0.376032	0	0	MIR639,DNAJB1,TECR	16,40,64	T0_vsT18_LC
chr19:18723685-18723686	cg20548814	0.19662	16.7401	7.87202e-05	0.376032	0	0	TMEM59L	34	T0_vsT18_LC
chr19:18853231-18853232	cg06726921	0.841249	16.9801	7.04808e-05	0.376032	0	0	CRTC1	76	T0_vsT18_LC
chr19:49468529-49468530	cg12867751	0.10462	16.8671	7.42441e-05	0.376032	0	0	FTL	18	T0_vsT18_LC
chr19:55987993-55987994	cg13579672	0.0431799	16.67	8.1308e-05	0.376032	0	0	CTD-2537I9.16,ZNF628	13,27	T0_vsT18_LC
chr8:145626662-145626663	cg03636657	0.865008	25.6267	4.48204e-06	0.37618	0	0	MIR1234,CPSF1	10,49	T0_vsT18_LFno
chr14:103599204-103599205	cg08301307	0.856589	25.4301	4.81042e-06	0.37618	0	0	TNFAIP2	39	T0_vsT18_LFno
chr6:31707961-31707962	cg24536200	0.0506201	16.6301	8.28178e-05	0.37639	0	0	CLIC1,MSH5,MSH5-SAPCD1	75,77,77	T0_vsT18_LC
chr14:55738124-55738125	cg10378898	0.0353913	16.6225	8.31099e-05	0.37639	0	0	RP11-665C16.6,FBXO34	27,54	T0_vsT18_LC
chr17:43301209-43301210	cg01738152	0.119991	16.6218	8.31357e-05	0.37639	0	0	FMNL1	35	T0_vsT18_LC
chr3:142341568-142341569	cg07878481	0.867583	16.5738	8.50031e-05	0.380836	0	0	PLS1	36	T0_vsT18_LC
chr4:173968080-173968081	cg13389177	0.912189	16.5828	8.46477e-05	0.380836	0	0	.		T0_vsT18_LC
chr4:108852651-108852652	cg23301257	0.067325	16.5519	8.58658e-05	0.382708	0	0	CYP2U1,RP11-286E11.1	25,43	T0_vsT18_LC
chr11:33279776-33279777	cg04024681	0.0653534	16.5152	8.73363e-05	0.386225	0	0	HIPK3	45	T0_vsT18_LC
chr14:65439236-65439237	cg18436128	0.0519685	16.5098	8.7553e-05	0.386225	0	0	RAB15,FNTB,CHURC1-FNTB	24103102	T0_vsT18_LC
chr18:77711201-77711202	cg15368769	0.101289	16.4874	8.84667e-05	0.388265	0	0	PQLC1	48	T0_vsT18_LC
chr17:7383041-7383042	cg01425110	0.0401092	16.4631	8.94643e-05	0.39065	0	0	ZBTB4	56	T0_vsT18_LC
chr1:203598330-203598331	cg27173151	0.0429174	16.4334	9.07034e-05	0.391606	0	0	ATP2B4	73	T0_vsT18_LC
chr7:21467710-21467711	cg04028315	0.0269507	16.4429	9.03063e-05	0.391606	0	0	SP4	19	T0_vsT18_LC
chr17:71308211-71308212	cg00229039	0.0693908	16.4159	9.14387e-05	0.391606	0	0	CDC42EP4	37	T0_vsT18_LC
chr17:79980825-79980826	cg10645943	0.11503	16.4144	9.15041e-05	0.391606	0	0	STRA13,LRRC45	23,22	T0_vsT18_LC
chr8:144511672-144511673	cg21884905	0.0975548	16.4031	9.19844e-05	0.391712	0	0	MAFA	27	T0_vsT18_LC
chr3:171176940-171176941	cg23533254	0.0862471	16.3838	9.28082e-05	0.393274	0	0	TNIK	121	T0_vsT18_LC
chr22:38902511-38902512	cg08522428	0.102315	16.3706	9.33774e-05	0.393746	0	0	DDX17	35	T0_vsT18_LC
chr3:9201159-9201160	cg00578334	0.829266	16.3351	9.49245e-05	0.394391	0	0	SRGAP3	159	T0_vsT18_LC
chr8:13305666-13305667	cg10071496	0.841843	16.2303	9.96497e-05	0.394391	0	0	DLC1	138	T0_vsT18_LC
chr9:35080138-35080139	cg12847655	0.0924936	16.2747	9.76177e-05	0.394391	0	0	FANCG	21	T0_vsT18_LC
chr11:1568372-1568373	cg02655881	0.0774096	16.2946	9.67213e-05	0.394391	0	0	.		T0_vsT18_LC
chr11:88153520-88153521	cg24406240	0.423039	16.2598	9.82974e-05	0.394391	0	0	.		T0_vsT18_LC
chr12:112191366-112191367	cg05505660	0.774501	16.2571	9.84191e-05	0.394391	0	0	ACAD10,RP11-162P23.2	52,45	T0_vsT18_LC
chr13:97762132-97762133	cg17667145	0.045657	16.2669	9.79733e-05	0.394391	0	0	.		T0_vsT18_LC
chr14:57275166-57275167	cg20575761	0.379014	16.2249	9.98992e-05	0.394391	0	0	OTX2	38	T0_vsT18_LC
chr14:105780695-105780696	cg27097962	0.0686398	16.305	9.62584e-05	0.394391	0	0	BRF1,PACS2	165174	T0_vsT18_LC
chr19:9247359-9247360	cg23972892	0.057463	16.2452	9.89643e-05	0.394391	0	0	.		T0_vsT18_LC
chr19:15543768-15543769	cg11757033	0.100104	16.2502	9.87338e-05	0.394391	0	0	WIZ	47	T0_vsT18_LC
chr22:23842503-23842504	cg25538103	0.591581	16.2749	9.76114e-05	0.394391	0	1	.		T0_vsT18_LC
chr1:37924089-37924090	cg15398203	0.926474	21.0377	2.45396e-05	0.398287	0	0	RP11-422J8.1	22	T0_vsT18_LFno
chr1:83452405-83452406	cg18411040	0.803609	22.3064	1.51705e-05	0.398287	0	0	RP11-170N11.1,RP4-601K24.1	9,21	T0_vsT18_LFno
chr2:25055223-25055224	cg08981986	0.884025	22.3718	1.48023e-05	0.398287	0	0	ADCY3	79	T0_vsT18_LFno
chr3:13358223-13358224	cg12444628	0.893627	21.9273	1.74992e-05	0.398287	0	0	NUP210	60	T0_vsT18_LFno
chr3:27864012-27864013	cg23343273	0.888559	24.519	6.69088e-06	0.398287	0	0	AC098973.2	10	T0_vsT18_LFno
chr4:41992485-41992486	cg14536921	0.0403053	21.4929	2.06297e-05	0.398287	0	0	RP11-814H16.2,SLC30A9	13,21	T0_vsT18_LFno
chr4:48272077-48272078	cg07849581	0.0448367	23.289	1.05145e-05	0.398287	0	0	TEC	56	T0_vsT18_LFno
chr4:105416336-105416337	cg03253629	0.298243	21.211	2.29679e-05	0.398287	0	0	CXXC4,AC004053.1	22,34	T0_vsT18_LFno
chr6:224798-224799	cg26491496	0.908247	23.4696	9.8346e-06	0.398287	0	0	.		T0_vsT18_LFno
chr7:211714-211715	ch.7.8314F	0.0806358	21.2149	2.29335e-05	0.398287	0	0	FAM20C	100	T0_vsT18_LFno
chr7:64023434-64023435	cg10988062	0.0894152	21.7514	1.87029e-05	0.398287	0	0	ZNF680	15	T0_vsT18_LFno
chr7:73869776-73869777	cg13205298	0.585735	21.4119	2.12756e-05	0.398287	0	0	GTF2IRD1	100	T0_vsT18_LFno
chr7:128502651-128502652	cg17140815	0.0503476	21.1449	2.35546e-05	0.398287	0	0	ATP6V1F,RP11-309L24.2,KCP	20,35,65	T0_vsT18_LFno
chr7:150759633-150759634	cg12199996	0.888977	24.1794	7.57468e-06	0.398287	0	0	SLC4A2	75	T0_vsT18_LFno
chr8:48795575-48795576	cg27652197	0.895258	21.2993	2.22071e-05	0.398287	0	0	PRKDC	79	T0_vsT18_LFno
chr8:57885566-57885567	cg01279789	0.894604	22.4532	1.43572e-05	0.398287	0	0	IMPAD1	21	T0_vsT18_LFno
chr9:36487138-36487139	cg22952469	0.0380082	22.6269	1.34534e-05	0.398287	0	0	RNF38	34	T0_vsT18_LFno
chr9:139137959-139137960	cg03838597	0.0700813	21.8707	1.78779e-05	0.398287	0	0	QSOX2	44	T0_vsT18_LFno
chr11:2413949-2413950	cg25197886	0.859383	23.9946	8.10528e-06	0.398287	0	0	CD81	88	T0_vsT18_LFno
chr11:66135269-66135270	cg15128778	0.817431	22.3272	1.50528e-05	0.398287	0	0	SLC29A2	25	T0_vsT18_LFno
chr11:69632335-69632336	cg13703576	0.0468209	21.7344	1.88237e-05	0.398287	0	0	FGF3	32	T0_vsT18_LFno
chr11:71175151-71175152	cg02411493	0.918772	22.6563	1.33062e-05	0.398287	0	0	NADSYN1	88	T0_vsT18_LFno
chr11:101785806-101785807	cg05972047	0.034691	23.1764	1.09629e-05	0.398287	0	0	ANGPTL5,KIAA1377	17,25	T0_vsT18_LFno
chr12:120528783-120528784	cg10336036	0.855972	21.329	2.19577e-05	0.398287	0	0	CCDC64	54	T0_vsT18_LFno
chr13:113714600-113714601	cg09039367	0.900778	21.6318	1.95702e-05	0.398287	0	0	MCF2L	427	T0_vsT18_LFno
chr16:89979720-89979721	cg03371322	0.822172	21.841	1.80797e-05	0.398287	0	0	RP11-566K11.7,MC1R	40,35	T0_vsT18_LFno
chr17:45174155-45174156	cg25856473	0.917743	21.1396	2.36023e-05	0.398287	0	0	RP11-156P1.3	29	T0_vsT18_LFno
chr17:77085322-77085323	ch.17.74596917R	0.076156	21.7442	1.87538e-05	0.398287	0	0	.		T0_vsT18_LFno
chr18:60291892-60291893	cg04546923	0.879723	22.1726	1.59537e-05	0.398287	0	0	.		T0_vsT18_LFno
chr19:2338773-2338774	cg03454456	0.835141	21.2765	2.2401e-05	0.398287	0	0	SPPL2B	49	T0_vsT18_LFno
chr19:17324035-17324036	cg09203597	0.818639	21.149	2.35182e-05	0.398287	0	0	MYO9B	98	T0_vsT18_LFno
chr19:18509505-18509506	cg08379517	0.895035	23.1851	1.09274e-05	0.398287	0	0	LRRC25	8	T0_vsT18_LFno
chr19:37957995-37957996	cg14142713	0.0625937	23.3628	1.02309e-05	0.398287	0	0	ZNF569,ZNF570	34,28	T0_vsT18_LFno
chr19:44079527-44079528	cg01880404	0.0550435	21.1455	2.35489e-05	0.398287	0	0	L34079.4,PINLYP,XRCC1,L34079.2	4,26,38,37	T0_vsT18_LFno
chr19:46172501-46172502	cg27657862	0.242066	24.6997	6.2651e-06	0.398287	0	0	GIPR	37	T0_vsT18_LFno
chr19:48980706-48980707	cg00718142	0.712492	22.4475	1.4388e-05	0.398287	0	0	CYTH2	27	T0_vsT18_LFno
chr20:31173467-31173468	cg05622865	0.135775	22.8805	1.22378e-05	0.398287	0	0	RP11-410N8.1,C20orf112	24107	T0_vsT18_LFno
chr21:33678047-33678048	cg26789762	0.924398	21.0493	2.44316e-05	0.398287	0	0	MRAP	25	T0_vsT18_LFno
chr22:19951181-19951182	cg27449804	0.858745	21.0854	2.40967e-05	0.398287	0	0	MIR4761,COMT	9,55	T0_vsT18_LFno
chr22:38037408-38037409	cg13474750	0.853673	22.5354	1.3922e-05	0.398287	0	0	SH3BP1	45	T0_vsT18_LFno
chr22:50894541-50894542	cg19193970	0.790326	23.8392	8.58172e-06	0.398287	1	0	SBF1	55	T0_vsT18_LFno
chr22:50945860-50945861	cg11108982	0.0963287	22.8632	1.23174e-05	0.398287	0	0	LMF2,NCAPH2	21,26	T0_vsT18_LFno
chr1:202927798-202927799	cg02108436	0.0501793	20.8539	2.63305e-05	0.407905	0	0	ADIPOR1	27	T0_vsT18_LFno
chr1:206730120-206730121	cg21218864	0.0687021	20.8317	2.65547e-05	0.407905	0	0	RASSF5	62	T0_vsT18_LFno
chr20:17115818-17115819	ch.20.356846R	0.0520961	20.882	2.60475e-05	0.407905	0	0	.		T0_vsT18_LFno
chr3:16454554-16454555	cg12346510	0.904863	20.6944	2.79926e-05	0.410001	0	0	RFTN1	105	T0_vsT18_LFno
chr17:39677971-39677972	cg26531709	0.809878	20.6825	2.81211e-05	0.410001	0	0	KRT15	28	T0_vsT18_LFno
chr17:41980251-41980252	cg06642183	0.854836	20.7046	2.78836e-05	0.410001	0	0	MPP2	47	T0_vsT18_LFno
chr1:110527541-110527542	cg02849769	0.0709136	20.4775	3.04312e-05	0.413939	0	0	AHCYL1	34	T0_vsT18_LFno
chr2:239169853-239169854	cg14782104	0.906225	20.5542	2.95448e-05	0.413939	0	0	PER2	45	T0_vsT18_LFno
chr5:177707036-177707037	cg06449486	0.0535926	20.4483	3.07762e-05	0.413939	0	0	COL23A1	249	T0_vsT18_LFno
chr19:16239180-16239181	ch.19.683370F	0.0834036	20.4465	3.07973e-05	0.413939	0	0	RAB8A,CTD-2231E14.8	36,15	T0_vsT18_LFno
chr20:17935312-17935313	cg27158878	0.925495	20.5386	2.97236e-05	0.413939	0	0	SNX5	42	T0_vsT18_LFno
chr5:118780998-118780999	cg07769070	0.590402	20.3871	3.15123e-05	0.414392	0	1	RNA5SP190	4	T0_vsT18_LFno
chr6:44084209-44084210	cg10049156	0.909474	20.3277	3.22435e-05	0.414392	0	0	MRPL14	25	T0_vsT18_LFno
chr16:79021949-79021950	cg08822689	0.821649	20.3251	3.22762e-05	0.414392	0	0	WWOX	224	T0_vsT18_LFno
chr1:17326868-17326869	cg09444866	0.858814	19.833	3.9065e-05	0.423597	0	0	RP1-37C10.3,ATP13A2	46,52	T0_vsT18_LFno
chr1:44433634-44433635	cg01293263	0.903381	19.6428	4.2073e-05	0.423597	0	0	IPO13	39	T0_vsT18_LFno
chr1:228337181-228337182	cg24052475	0.757222	19.66	4.17899e-05	0.423597	0	0	GJC2	19	T0_vsT18_LFno
chr3:12841443-12841444	cg12194939	0.881284	19.2451	4.91635e-05	0.423597	0	0	CAND2	70	T0_vsT18_LFno
chr3:52858458-52858459	cg10219765	0.797802	19.3918	4.64124e-05	0.423597	0	0	ITIH4-AS1,ITIH4,RP5-966M1.6	9,26,40	T0_vsT18_LFno
chr3:111260893-111260894	cg09459339	0.0841469	20.007	3.65092e-05	0.423597	0	0	CD96	64	T0_vsT18_LFno
chr4:652527-652528	cg13142019	0.925544	19.4297	4.57297e-05	0.423597	0	0	PDE6B	93	T0_vsT18_LFno
chr6:30640372-30640373	cg11392995	0.0853338	19.7614	4.01703e-05	0.423597	0	0	DHX16	75	T0_vsT18_LFno
chr7:150039392-150039393	cg12562418	0.920419	19.7392	4.05191e-05	0.423597	0	0	RARRES2,RP4-584D14.7	14,10	T0_vsT18_LFno
chr8:11821710-11821711	cg01690165	0.750914	19.8541	3.87456e-05	0.423597	1	0	.		T0_vsT18_LFno
chr9:34523253-34523254	cg06590470	0.0621902	20.0576	3.57996e-05	0.423597	0	0	ENHO,RP11-296L22.8	9,11	T0_vsT18_LFno
chr9:130976736-130976737	cg00614716	0.888121	20.1051	3.51454e-05	0.423597	0	0	DNM1	50	T0_vsT18_LFno
chr9:139377021-139377022	cg02071439	0.0568348	19.1553	5.09285e-05	0.423597	0	0	C9orf163	18	T0_vsT18_LFno
chr9:140008980-140008981	cg13575271	0.108071	19.5703	4.32811e-05	0.423597	0	0	DPP7	15	T0_vsT18_LFno
chr10:43130566-43130567	ch.10.983355R	0.152763	19.1703	5.06306e-05	0.423597	0	1	ZNF33B,ZNF33B	18,18	T0_vsT18_LFno
chr10:118594601-118594602	cg04783139	0.925759	19.7296	4.06718e-05	0.423597	0	0	RP11-539I5.1	30	T0_vsT18_LFno
chr11:624603-624604	cg15806880	0.799052	19.1412	5.12132e-05	0.423597	0	0	CDHR5	41	T0_vsT18_LFno
chr11:2424015-2424016	cg02485697	0.828606	19.5664	4.33474e-05	0.423597	0	0	TSSC4	50	T0_vsT18_LFno
chr11:46141386-46141387	cg16480966	0.0245762	19.7449	4.0429e-05	0.423597	0	0	PHF21A	64	T0_vsT18_LFno
chr11:104966249-104966250	cg16577567	0.900673	19.1899	5.02406e-05	0.423597	0	0	CASP1,CARD16,CARD17	33,19,7	T0_vsT18_LFno
chr12:47610276-47610277	cg20515823	0.0683632	19.7416	4.04815e-05	0.423597	0	0	PCED1B-AS1,PCED1B	20,77	T0_vsT18_LFno
chr12:121624044-121624045	cg25365610	0.90218	19.2156	4.97361e-05	0.423597	0	0	RP11-340F14.5	4	T0_vsT18_LFno
chr14:23574175-23574176	cg19577365	0.879247	19.6807	4.14545e-05	0.423597	0	0	.		T0_vsT18_LFno
chr14:50087093-50087094	cg01797567	0.0692021	19.3415	4.73383e-05	0.423597	0	0	MGAT2,RPL36AL	19,21	T0_vsT18_LFno
chr14:92506784-92506785	cg06665984	0.0757701	19.2655	4.87714e-05	0.423597	0	0	TRIP11	27	T0_vsT18_LFno
chr17:1195910-1195911	cg10112636	0.802458	19.3102	4.79215e-05	0.423597	0	0	TUSC5	22	T0_vsT18_LFno
chr17:5392363-5392364	cg03228407	0.921056	19.5862	4.30124e-05	0.423597	0	0	MIS12	24	T0_vsT18_LFno
chr17:16939856-16939857	cg21221085	0.278936	19.4932	4.46062e-05	0.423597	0	0	.		T0_vsT18_LFno
chr17:63060161-63060162	cg14602839	0.931496	19.3526	4.71313e-05	0.423597	0	0	.		T0_vsT18_LFno
chr19:7953354-7953355	cg13465955	0.31693	19.1894	5.02519e-05	0.423597	0	0	RNA5SP463,LRRC8E	14,30	T0_vsT18_LFno
chr19:12786938-12786939	cg07201740	0.915527	19.2613	4.88502e-05	0.423597	0	0	DHPS	19	T0_vsT18_LFno
chr19:47569185-47569186	cg18657341	0.885134	19.4471	4.54189e-05	0.423597	0	0	ZC3H4	37	T0_vsT18_LFno
chr20:30413750-30413751	cg18024538	0.75975	19.2906	4.82918e-05	0.423597	0	0	MYLK2	29	T0_vsT18_LFno
chr21:44112478-44112479	cg21745720	0.901277	19.3828	4.65773e-05	0.423597	0	0	PDE9A	88	T0_vsT18_LFno
chr22:36044540-36044541	cg02494781	0.0881875	19.6024	4.27414e-05	0.423597	0	0	APOL6	12	T0_vsT18_LFno
chr22:38071168-38071169	cg00292662	0.0869128	19.7291	4.06787e-05	0.423597	0	0	LGALS1	20	T0_vsT18_LFno
chr22:41656433-41656434	cg25724106	0.912397	19.9488	3.73436e-05	0.423597	0	0	RANGAP1	44	T0_vsT18_LFno
chr6:32158153-32158154	cg09028157	0.104093	19.0225	5.36626e-05	0.439629	0	0	PBX2	46	T0_vsT18_LFno
chr3:167968368-167968369	cg13304297	0.126849	18.9652	5.48889e-05	0.444413	0	0	EGFEM1P	62	T0_vsT18_LFno
chr21:43483090-43483091	cg18996876	0.0695351	18.9472	5.52797e-05	0.444413	0	0	UMODL1	88	T0_vsT18_LFno
chr1:3508884-3508885	cg17183752	0.837057	18.8364	5.77525e-05	0.44486	0	0	MEGF6	157	T0_vsT18_LFno
chr1:32930473-32930474	cg13666729	0.0853397	18.8092	5.83764e-05	0.44486	0	0	ZBTB8B,RP1-27O5.3	22,47	T0_vsT18_LFno
chr3:52031194-52031195	cg06489668	0.788422	18.8489	5.74679e-05	0.44486	0	0	RPL29	13	T0_vsT18_LFno
chr5:149111604-149111605	cg25768776	0.136092	18.8616	5.71809e-05	0.44486	0	0	MIR378A,PPARGC1B	8,59	T0_vsT18_LFno
chr15:74426957-74426958	cg25833989	0.0976737	18.7843	5.89555e-05	0.44486	0	0	ISLR2	71	T0_vsT18_LFno
chr17:6533972-6533973	ch.17.254251R	0.0698345	18.921	5.58554e-05	0.44486	0	0	KIAA0753	51	T0_vsT18_LFno
chr19:51309382-51309383	cg08977791	0.928176	18.7877	5.88748e-05	0.44486	0	0	C19orf48	34	T0_vsT18_LFno
chr1:183897368-183897369	cg13951632	0.880386	18.6936	6.11094e-05	0.451721	0	0	RGL1	109	T0_vsT18_LFno
chr1:200963729-200963730	cg27481821	0.877354	18.68	6.144e-05	0.451721	0	0	KIF21B	50	T0_vsT18_LFno
chr7:32031547-32031548	cg16074873	0.89181	18.6977	6.10099e-05	0.451721	0	0	PDE1C	114	T0_vsT18_LFno
chr11:32338313-32338314	cg05034271	0.935523	18.6569	6.20064e-05	0.452022	0	0	RP1-65P5.1	42	T0_vsT18_LFno
chr1:228266701-228266702	cg00384553	0.776017	18.6247	6.28009e-05	0.452261	0	0	.		T0_vsT18_LFno
chr3:38151110-38151111	cg22526435	0.796649	18.5922	6.36165e-05	0.452261	0	0	ACAA1,DLEC1	43,38	T0_vsT18_LFno
chr8:145139460-145139461	cg22420671	0.841911	18.607	6.32446e-05	0.452261	0	1	GPAA1	22	T0_vsT18_LFno
chrX:122906025-122906026	cg15216844	0.873146	18.5556	6.45483e-05	0.455124	0	0	RNU7-69P	2	T0_vsT18_LFno
chr1:249128879-249128880	cg02152128	0.133602	18.485	6.63817e-05	0.464124	0	0	.		T0_vsT18_LFno
chr4:103747076-103747077	cg24923412	0.155079	18.4653	6.69039e-05	0.464124	0	0	UBE2D3	57	T0_vsT18_LFno
chr4:56223369-56223370	cg14522254	0.893889	18.3767	6.93056e-05	0.465761	0	0	SRD5A3	22	T0_vsT18_LFno
chr4:125384961-125384962	cg14567203	0.642151	18.3794	6.92302e-05	0.465761	0	1	TECRP2	1	T0_vsT18_LFno
chr16:74455562-74455563	cg06081722	0.856254	18.4186	6.81582e-05	0.465761	0	1	RP11-252A24.5,CLEC18B	9,9	T0_vsT18_LFno
chr19:39653730-39653731	cg11717751	0.880181	18.4125	6.83242e-05	0.465761	0	0	PAK4	52	T0_vsT18_LFno
chr2:47433265-47433266	cg24857399	0.898608	18.2611	7.25709e-05	0.470162	0	0	AC073283.4	59	T0_vsT18_LFno
chr5:126144274-126144275	cg09588733	0.339619	18.2448	7.30442e-05	0.470162	0	0	LMNB1	32	T0_vsT18_LFno
chr7:155963075-155963076	cg01002098	0.860089	18.246	7.30086e-05	0.470162	0	0	.		T0_vsT18_LFno
chr9:140212617-140212618	cg14502669	0.859333	18.201	7.4333e-05	0.470162	0	0	EXD3	103	T0_vsT18_LFno
chr11:68579907-68579908	cg08850249	0.825917	18.2013	7.43243e-05	0.470162	0	0	CPT1A	89	T0_vsT18_LFno
chr12:7283872-7283873	cg24351128	0.0499552	18.2054	7.42001e-05	0.470162	0	0	RP11-273B20.1,CLSTN3	25,56	T0_vsT18_LFno
chr17:1150572-1150573	cg26015501	0.843337	18.2895	7.17534e-05	0.470162	0	1	AC144836.1	12	T0_vsT18_LFno
chr22:30662874-30662875	cg10467217	0.0931685	18.311	7.11404e-05	0.470162	0	0	OSM	13	T0_vsT18_LFno
chr1:47645007-47645008	cg24177808	0.0934471	18.1678	7.53249e-05	0.47173	0	0	LINC00853,CYP4A22-AS1	11,23	T0_vsT18_LFno
chr7:143020597-143020598	cg25091053	0.904558	18.1561	7.56778e-05	0.47173	0	0	CLCN1	33	T0_vsT18_LFno
chr1:2024593-2024594	cg01164686	0.885504	17.6007	9.45608e-05	0.473349	0	0	PRKCZ	301	T0_vsT18_LFno
chr1:12607978-12607979	cg14835015	0.831689	17.7922	8.755e-05	0.473349	0	0	.		T0_vsT18_LFno
chr2:174443047-174443048	cg22727812	0.863733	17.8395	8.59041e-05	0.473349	0	0	.		T0_vsT18_LFno
chr2:220333683-220333684	cg07582167	0.892567	17.4904	9.88614e-05	0.473349	0	0	SPEG	109	T0_vsT18_LFno
chr3:48693597-48693598	cg26468478	0.116925	17.5789	9.53956e-05	0.473349	0	0	CELSR3	44	T0_vsT18_LFno
chr3:50283471-50283472	cg15245951	0.0570965	17.8012	8.72364e-05	0.473349	0	0	GNAI2	75	T0_vsT18_LFno
chr3:53323893-53323894	cg02203517	0.899454	18.1228	7.66887e-05	0.473349	0	0	Y_RNA,DCP1A	1,35	T0_vsT18_LFno
chr3:107941759-107941760	cg17773376	0.106473	17.6091	9.4244e-05	0.473349	1	0	IFT57	21	T0_vsT18_LFno
chr3:173127198-173127199	ch.3.3371471R	0.0635913	17.99	8.08738e-05	0.473349	0	0	NLGN1	95	T0_vsT18_LFno
chr3:184086950-184086951	ch.3.3598421F	0.0737669	17.4996	9.84967e-05	0.473349	0	0	EIF2B5	619	T0_vsT18_LFno
chr5:92946500-92946501	cg12390895	0.0794013	17.8654	8.50154e-05	0.473349	0	0	.		T0_vsT18_LFno
chr7:44706325-44706326	cg20526995	0.885042	17.5864	9.51083e-05	0.473349	0	0	OGDH	50	T0_vsT18_LFno
chr7:73406572-73406573	cg12177653	0.822745	17.9397	8.25208e-05	0.473349	0	0	.		T0_vsT18_LFno
chr7:90032834-90032835	cg06845991	0.088644	17.7228	9.00284e-05	0.473349	0	0	CLDN12,CTB-13L3.1	37,33	T0_vsT18_LFno
chr10:696356-696357	cg22656048	0.902937	17.8028	8.71789e-05	0.473349	0	0	PRR26,DIP2C	29613	T0_vsT18_LFno
chr10:80897742-80897743	cg25997979	0.0481826	17.9842	8.10606e-05	0.473349	0	0	ZMIZ1	201	T0_vsT18_LFno
chr11:72479131-72479132	cg25205121	0.848675	17.6094	9.42309e-05	0.473349	0	0	ARAP1,STARD10	133,54	T0_vsT18_LFno
chr11:88071409-88071410	cg12391538	0.0423173	17.7049	9.0676e-05	0.473349	0	0	CTSC	23	T0_vsT18_LFno
chr12:102318687-102318688	cg22900794	0.870209	18.1042	7.72625e-05	0.473349	0	0	RP11-512N21.3,DRAM1	4,39	T0_vsT18_LFno
chr14:23417395-23417396	cg06579353	0.902002	17.9756	8.13409e-05	0.473349	0	0	HAUS4,RP11-298I3.1,RP11-298I3.5	17,22,54	T0_vsT18_LFno
chr14:65194515-65194516	cg14697542	0.928318	17.7619	8.86221e-05	0.473349	0	0	PLEKHG3	63	T0_vsT18_LFno
chr14:75988747-75988748	cg15645309	0.13844	17.9385	8.25586e-05	0.473349	0	0	BATF	24	T0_vsT18_LFno
chr14:105708255-105708256	cg16579351	0.85542	17.5874	9.5071e-05	0.473349	0	0	BRF1	165	T0_vsT18_LFno
chr15:60884773-60884774	cg15107038	0.0429693	17.8227	8.64865e-05	0.473349	0	0	RP11-219B17.1,RORA	90238	T0_vsT18_LFno
chr16:19514279-19514280	cg27333283	0.790308	17.4798	9.92866e-05	0.473349	0	0	GDE1	16	T0_vsT18_LFno
chr16:75443530-75443531	cg16737713	0.901957	17.8103	8.69167e-05	0.473349	0	0	SNORA76,CFDP1	5,49	T0_vsT18_LFno
chr16:89395412-89395413	cg00329180	0.845631	17.5466	9.66463e-05	0.473349	0	1	ANKRD11	345	T0_vsT18_LFno
[truncated: 200 more rows]

## Sheet: Table S7
Table S7: Full list of intervention specific DMRs
location	ProbeIDs	deltaM	probes/DMR	2D-KS_p-value	comparison	SNPprobes	Cross-reactive probes	genes	probes/gene
chr1:564503-565170	cg22519184,cg11894324,cg24159721,cg22519184,cg11894324,cg24159721,cg22519184,cg11894324,cg24159721,cg22519184,cg11894324,cg24159721,cg22519184,cg11894324,cg24159721	-0.038060	3	0.015	LF	0	1	RP5-857K21.5,MTND1P23,MTND2P28,hsa-mir-6723,RP5-857K21.4	6,3,6,14,25
chr1:564503-565170	cg22519184,cg11894324,cg24159721,cg22519184,cg11894324,cg24159721,cg22519184,cg11894324,cg24159721,cg22519184,cg11894324,cg24159721,cg22519184,cg11894324,cg24159721	-0.039593	3	0.0091	LC	0	1	RP5-857K21.5,MTND1P23,MTND2P28,hsa-mir-6723,RP5-857K21.4	6,3,6,14,25
chr1:564503-565170	cg22519184,cg11894324,cg24159721,cg22519184,cg11894324,cg24159721,cg22519184,cg11894324,cg24159721,cg22519184,cg11894324,cg24159721,cg22519184,cg11894324,cg24159721	-0.041823	3	0.0033	no	0	1	RP5-857K21.5,MTND1P23,MTND2P28,hsa-mir-6723,RP5-857K21.4	6,3,6,14,25
chr1:564503-565170	cg22519184,cg11894324,cg24159721,cg22519184,cg11894324,cg24159721,cg22519184,cg11894324,cg24159721,cg22519184,cg11894324,cg24159721,cg22519184,cg11894324,cg24159721	-0.041952	3	1.4e-05	all	0	1	RP5-857K21.5,MTND1P23,MTND2P28,hsa-mir-6723,RP5-857K21.4	6,3,6,14,25
chr1:564503-565170	cg22519184,cg11894324,cg24159721,cg22519184,cg11894324,cg24159721,cg22519184,cg11894324,cg24159721,cg22519184,cg11894324,cg24159721,cg22519184,cg11894324,cg24159721	-0.042081	3	0.0031	PA	0	1	RP5-857K21.5,MTND1P23,MTND2P28,hsa-mir-6723,RP5-857K21.4	6,3,6,14,25
chr1:567311-567358	cg05001044,cg03344490,cg17501828,cg05001044,cg03344490,cg17501828,cg05001044,cg03344490,cg17501828,cg05001044,cg03344490,cg17501828	-0.030886	3	0.0099	LC	0	2	hsa-mir-6723,RP5-857K21.7,RP5-857K21.4	14,11,25
chr1:567311-567358	cg05001044,cg03344490,cg17501828,cg05001044,cg03344490,cg17501828,cg05001044,cg03344490,cg17501828,cg05001044,cg03344490,cg17501828	-0.031489	3	0.0029	PA	0	2	hsa-mir-6723,RP5-857K21.7,RP5-857K21.4	14,11,25
chr1:567311-567358	cg05001044,cg03344490,cg17501828,cg05001044,cg03344490,cg17501828,cg05001044,cg03344490,cg17501828,cg05001044,cg03344490,cg17501828	-0.031861	3	7.6e-05	all	0	2	hsa-mir-6723,RP5-857K21.7,RP5-857K21.4	14,11,25
chr1:567311-567358	cg05001044,cg03344490,cg17501828,cg05001044,cg03344490,cg17501828,cg05001044,cg03344490,cg17501828,cg05001044,cg03344490,cg17501828	-0.032234	3	0.004	no	0	2	hsa-mir-6723,RP5-857K21.7,RP5-857K21.4	14,11,25
chr6:31589364-31589994	cg17478749,cg23351738,cg16932560	0.031477	3	0.015	LC_PA	0	0	SNORA38,PRRC2A	4.157
chr7:47621331-47621692	cg06824382,cg12172057,cg06352730	-0.037575	3	0.034	LC_no	0	0	TNS3	199
chr12:6797952-6798118	cg14101604,cg19017289,cg03466082	0.031731	3	0.0016	LF_no	0	0	ZNF384	37
chr16:67197177-67197186	cg20291548,cg05436064,cg07816687	0.033835	3	0.0075	LC_PA	0	0	FBXL8,HSF4,RP11-5A19.5	37,30,19
chrX:149106754-149106807	cg03814733,cg12857193,cg26289980	-0.030175	3	0.018	LC_PA	0	0	CXorf40B,LINC00894	18.35
Table S7: DMRs were computed for the whole data set as well as for the two clusters with respect to cell type composition. We compared genome wide DNA methylation prior and post intervention (T0 vs. T18) separated by either diet (MED/LC; LF) or by diet and exercise levels (MED/LC +PA; MED/LC no; LF +PA; LF no). Furthermore, differences of interventions (LC vs LF, no vs PA+) were computed prior an…

## Sheet: Table S8
Table S8: Full list of EWAS CpGs for weight-change
location	ProbeID	combined_p-value	combined_correl	SNPprobes	cross-reactive_probes	genes	probes/gene
chr9:128330232-128330233	cg07095470	2.13894e-06	0.415657	0	0	RP11-12A16.3,MAPKAP1	4.87
chr20:48681452-48681453	cg17800653	2.89151e-06	0.410279	0	0	.
chr20:30102074-30102075	cg15677825	3.64554e-06	0.40785	0	0	HM13	51
chr8:47108510-47108511	cg17451432	7.25868e-06	0.396511	0	0	.
chr16:85061578-85061579	cg24148044	9.60171e-06	-0.39043	0	0	KIAA0513	85
chr4:2860776-2860777	cg12655250	1.03553e-05	0.39022	0	0	ADD1	60
chr1:10676746-10676747	cg15465343	1.10438e-05	0.388971	0	0	RN7SL614P,PEX14	6.97
chr21:43995264-43995265	cg03338614	1.53041e-05	0.381355	0	0	SLC37A1	92
chr1:155224863-155224864	cg27306034	1.65133e-05	0.382167	0	0	FAM189B	22
chr14:24611228-24611229	cg27131958	1.66638e-05	0.381131	0	0	EMC9	20
chr6:34312254-34312255	cg06612671	1.85412e-05	-0.379667	0	0	NUDT3,RPS10-NUDT3	40.55
chr3:39766166-39766167	cg26255198	2.68388e-05	-0.369599	0	0	.
chr16:32599433-32599434	cg07575166	2.95334e-05	0.363299	0	1	.
chr14:23832577-23832578	cg20081151	3.0238e-05	-0.370666	0	0	EFS	19
chr2:43285304-43285305	cg11644519	3.60853e-05	-0.367591	0	0	.
chr5:74614787-74614788	cg13658567	3.80965e-05	0.365527	0	0	.
chr14:19109264-19109265	cg01588177	3.95428e-05	0.365892	0	1	RP11-754I20.1	6
chr10:35027638-35027639	cg25217535	3.97516e-05	0.365327	0	0	PARD3	211
chr6:30009242-30009243	cg02362309	4.04387e-05	0.364775	0	1	ZNRD1-AS1	223
chr1:151941392-151941393	cg18551486	4.22465e-05	0.363467	0	0	.
chr7:30741951-30741952	cg01179849	4.41082e-05	0.362464	0	0	INMT	39
chr20:58637969-58637970	cg10707578	4.4336e-05	0.362478	0	0	C20orf197	16
chr8:25937278-25937279	cg24548782	4.62614e-05	0.362792	0	0	.
chr18:76148676-76148677	cg00027586	4.88724e-05	0.361851	0	0	.
chr12:96710026-96710027	cg12874388	4.89494e-05	0.36094	0	1	CDK17	44
chr20:30947335-30947336	cg20654317	5.34863e-05	-0.358759	0	0	ASXL1	36
chr11:93884806-93884807	cg07307518	5.40302e-05	0.35932	0	0	PANX1	38
chr12:69982015-69982016	cg00914575	5.77386e-05	0.358507	0	0	CCT2	27
chr12:56837403-56837404	cg27660825	5.92256e-05	0.35796	0	1	TIMELESS	21
chr22:31488064-31488065	cg06227020	5.93091e-05	0.357834	0	0	SMTN	59
chr4:48508755-48508756	cg00381473	5.95427e-05	-0.357497	0	0	FRYL	74
chr4:186092824-186092825	cg14651481	6.24725e-05	-0.354276	0	0	KIAA1430	40
chr2:232456125-232456126	cg02094889	6.63359e-05	0.354055	0	0	C2orf57	7
chr19:51497512-51497513	cg05081162	6.73546e-05	0.35557	0	0	CTB-147C22.9	59
chr2:202507599-202507600	cg09502531	7.31631e-05	0.352593	0	0	TMEM237	27
chr16:66914802-66914803	cg01777630	8.20107e-05	-0.351288	0	0	PDP2	27
chr13:114201583-114201584	cg11206724	8.30031e-05	0.350645	0	0	TMCO3	108
chr7:1694822-1694823	cg25127064	8.61102e-05	0.350668	0	0	.
chr1:84763932-84763933	cg11555919	8.75277e-05	-0.350012	0	0	SAMD13	37
chr5:86563580-86563581	cg09890887	8.79946e-05	-0.346434	0	0	RASA1	46
chr11:1220228-1220229	cg14377687	8.93413e-05	-0.349897	0	0	MUC5AC	49
chr8:117864506-117864507	cg09926452	9.16977e-05	-0.349139	0	0	RAD21	39
chr5:52929435-52929436	cg17945541	9.18704e-05	0.348562	0	0	NDUFS4	31
chr12:124808992-124808993	cg15265970	9.7238e-05	-0.348214	0	0	NCOR2	334
chr6:100483904-100483905	cg08115674	9.74908e-05	0.348083	0	0	MCHR2-AS1	23
chr1:110753895-110753896	cg26569469	9.93168e-05	0.343589	0	0	KCNC4-AS1,KCNC4	19.47
chr11:117054853-117054854	cg19551278	9.94225e-05	-0.347463	0	0	SIDT2	34
chr4:2044056-2044057	cg14381390	0.000101053	0.306384	0	0	C4orf48,NELFA	16.78
chr16:57004888-57004889	cg06307915	0.000102656	-0.343555	1	0	CETP	18
chr9:130674053-130674054	cg14518988	0.000104011	0.344452	0	0	ST6GALNAC4	27
chr1:236893176-236893177	cg19605359	0.000105435	-0.3459	0	0	ACTN2	55
chr1:1109676-1109677	cg01511231	0.000109259	0.345785	0	0	TTLL10-AS1,TTLL10	32.5
chr5:68824022-68824023	cg15269794	0.000110236	-0.343916	0	0	OCLN,GUSBP3	38.32
chr6:106551032-106551033	cg09305161	0.000113469	0.344691	0	0	PRDM1	39
chr3:100210582-100210583	cg07907506	0.000116505	-0.343228	0	0	TMEM45A	26
chr16:31168231-31168232	cg06359671	0.000117503	-0.344325	0	0	.
chr1:9212754-9212755	cg24501230	0.000117653	-0.344312	0	0	MIR34A	4
chr17:72890018-72890019	cg09300623	0.000118368	-0.343844	0	0	FADS6	26
chr14:51026322-51026323	cg02654939	0.000122389	0.341952	1	0	ATL1,MAP4K5	49.68
chr4:136198436-136198437	cg11564211	0.000123312	-0.343323	0	0	.
chr19:45320727-45320728	cg17921863	0.000127534	-0.342183	0	0	BCAM	26
chr6:28832496-28832497	cg03091027	0.000127779	-0.339133	0	0	XXbac-BPG308K3.6	80
chr17:58228954-58228955	cg16021958	0.000132566	-0.341735	0	0	CA4	29
chr4:62635353-62635354	cg07174347	0.00013435	0.34159	0	0	LPHN3	89
chr8:6456427-6456428	cg02349934	0.000135867	0.341244	0	0	MCPH1	125
chr7:31833208-31833209	cg08692405	0.000136769	-0.341078	0	0	AC006377.1,PDE1C	3.114
chr2:128071198-128071199	cg21329012	0.000137064	-0.340901	0	0	MAP3K2	26
chr12:52079435-52079436	cg13293189	0.00013763	-0.339842	0	0	SCN8A	62
chr8:67974458-67974459	cg26329349	0.000142769	0.3397	0	0	COPS5,CSPP1	41.48
chr8:136271670-136271671	cg20747789	0.00014299	0.339655	0	1	RP11-452N4.1	10
chr2:47595507-47595508	cg24916165	0.000146198	0.337437	0	0	EPCAM	37
chr1:116022091-116022092	cg03324464	0.000146879	0.339624	0	0	.
chr1:67550316-67550317	cg15548284	0.00014826	0.33951	0	1	.
chr3:147129278-147129279	cg00842299	0.000148684	-0.33885	0	0	ZIC1	138
chr1:6705762-6705763	cg08499288	0.00014917	-0.33907	0	0	DNAJC11	51
chr8:117112488-117112489	cg05618883	0.000149209	-0.337838	0	0	LINC00536	58
chr5:176910622-176910623	cg17652716	0.000149446	0.339377	0	0	PDLIM7	41
chr17:50134858-50134859	cg00260259	0.000152025	0.33798	0	0	CA10	76
chr16:88690881-88690882	cg03288803	0.000152434	-0.338647	1	0	ZC3H18	65
chr17:79663739-79663740	cg24073738	0.00015829	0.333945	0	0	HGS	65
chr15:90644999-90645000	cg00683276	0.000158581	0.338088	0	0	IDH2,CTD-2315E11.1	25.16
chr5:167891807-167891808	cg08689737	0.000158794	-0.335848	0	0	WWC1	78
chr7:148679906-148679907	cg16174274	0.000163064	-0.334233	0	0	RNY3	9
chr1:115289567-115289568	cg12456435	0.000163437	-0.32854	0	0	CSDE1	38
chr5:76926752-76926753	cg12614687	0.000163976	0.334976	0	0	OTP	37
chr22:36693445-36693446	cg25783745	0.000166305	0.336011	0	0	MYH9	99
chr3:121741090-121741091	cg27348043	0.000167808	-0.336888	0	0	ILDR1	29
chr2:152526948-152526949	cg21665113	0.000167994	-0.336027	0	0	NEB	56
chr13:31159934-31159935	cg20369140	0.000168242	-0.336418	0	0	HMGB1	55
chr13:27825352-27825353	cg12584034	0.000169126	-0.336738	0	0	RPL21	24
chr11:19185400-19185401	cg08786399	0.000169551	-0.336476	0	0	ZDHHC13	24
chr22:39529323-39529324	cg03141856	0.000171986	-0.336417	0	0	CBX7	42
chr8:70166634-70166635	cg04799493	0.000172271	0.336266	0	1	.
chr8:119112130-119112131	cg00423845	0.000172605	0.334519	0	0	EXT1	154
chrX:100673714-100673715	cg27293500	0.000173696	0.335947	0	0	ARMCX4	27
chr6:31973051-31973052	cg03239580	0.000174933	-0.335838	0	0	CYP21A1P	6
chr16:58881971-58881972	cg12507282	0.000175228	-0.334667	0	0	RP11-700H13.1,RP11-410D17.2	11.58
chr6:44095399-44095400	cg10343854	0.000176388	-0.334216	0	0	MRPL14,TMEM63B	25.4
chr6:170231937-170231938	cg00390176	0.000177383	0.335137	0	0	.
chr3:122413361-122413362	cg19783812	0.000178222	0.335543	0	0	PARP14	32
chr22:32342699-32342700	cg18068862	0.000180741	-0.331722	0	0	C22orf24,YWHAH	36.32
chr20:39321473-39321474	cg18616175	0.000185761	-0.33453	0	0	.
chr3:47484491-47484492	cg16119619	0.000187878	-0.334505	0	0	SCAP	47
chr6:115989126-115989127	cg04193905	0.000188366	-0.334452	0	0	.
chr4:24479782-24479783	cg11012749	0.000188871	-0.334022	0	0	.
chr12:122467179-122467180	cg23474890	0.000194369	-0.333707	0	0	BCL7A	37
chr9:77668920-77668921	cg17323410	0.00020471	0.332722	0	0	.
chr13:96224250-96224251	cg16904430	0.000206359	0.326457	0	0	CLDN10	73
chr8:891513-891514	cg12518217	0.00020979	-0.324714	0	0	ERICH1-AS1	404
chr12:116077977-116077978	cg03545346	0.000210465	0.331715	0	0	RP11-1028N23.4	14
chr8:144990141-144990142	cg00480429	0.000212156	0.331829	0	0	PLEC	161
chr22:26038875-26038876	cg16137838	0.000212189	-0.330951	0	0	ADRBK2	60
chr5:118241701-118241702	cg08962017	0.000214173	0.331446	0	0	DTWD2	25
chr5:36419521-36419522	cg09972634	0.00021583	-0.331601	1	0	.
chr10:134231487-134231488	cg09287328	0.000219427	-0.33088	0	0	RP11-432J24.2	6
chr1:218523325-218523326	cg20698667	0.000220402	-0.330781	0	0	TGFB2	42
chr14:55241571-55241572	cg23858502	0.000220946	-0.329596	0	0	SAMD4A	103
chr20:33983697-33983698	cg10973379	0.000221694	0.32877	0	0	UQCC1	41
chr8:37160012-37160013	cg12410280	0.000224014	-0.329	1	0	.
chr4:178360978-178360979	cg27436044	0.000225	0.330535	0	0	AGA	12
chr17:78929938-78929939	cg11762703	0.000226604	0.328743	0	0	RPTOR	555
chr3:106144101-106144102	cg13821988	0.000227242	0.330345	0	0	.
chr11:96240556-96240557	cg09727478	0.00022778	0.330299	0	0	RP11-49K4.2,JRKL,JRKL-AS1	4,34,10
chr6:44191288-44191289	cg00386034	0.000230377	-0.32867	0	0	SLC29A1	45
chr9:101624142-101624143	cg21497450	0.000231637	0.326945	0	0	RP11-92C4.3	9
chr17:75282995-75282996	cg07843160	0.00023237	0.329909	0	0	40057	260
chr16:22089022-22089023	cg20887670	0.000232761	0.329828	0	0	C16orf52	34
chr2:31441554-31441555	cg16504661	0.000234597	-0.329443	0	0	CAPN14	35
chr7:5429036-5429037	cg22668002	0.000234678	0.329585	0	0	TNRC18	165
chr7:6188723-6188724	cg05638347	0.000236667	0.329045	0	0	USP42	52
chr5:180428536-180428537	cg23234602	0.000238759	0.327798	0	1	BTNL3	12
chr6:90272030-90272031	cg14820360	0.00023927	-0.329338	0	0	RP11-16C18.3,ANKRD6	28.8
chr19:2809333-2809334	cg07337580	0.00024412	-0.308774	0	0	THOP1	47
chr19:3008169-3008170	cg18542882	0.000244542	-0.328216	0	0	TLE2	72
chr22:40589892-40589893	cg04136484	0.000244999	-0.327673	0	0	TNRC6B	78
chr11:8788219-8788220	cg05416934	0.000245242	-0.328541	0	0	ST5	165
chr11:2109690-2109691	cg07296665	0.000246866	0.328436	0	0	.
chr6:169283989-169283990	cg00950412	0.000247782	-0.328136	0	0	.
chr1:46918254-46918255	cg15560801	0.000248961	-0.328157	0	0	.
chr18:77724447-77724448	cg11687085	0.000249645	-0.32733	0	0	HSBP1L1	17
chr1:2820995-2820996	cg20849957	0.000250408	-0.328342	0	0	.
chr17:7579705-7579706	cg09168066	0.00025402	-0.327994	0	0	TP53	51
chr5:11284033-11284034	cg10808406	0.000255906	-0.327912	0	0	CTNND2	116
chr7:76750857-76750858	cg11586216	0.000256574	0.32785	0	1	FAM185BP,RP11-467H10.2,CCDC146	17,31,65
chr11:107640397-107640398	cg17168358	0.000257229	-0.326235	0	0	.
chr16:85075076-85075077	cg04967410	0.000260307	-0.32731	0	0	KIAA0513	85
chr5:149655410-149655411	cg16860720	0.000260595	0.326715	0	0	CAMK2A	57
chr2:49482872-49482873	cg18064315	0.000261317	-0.320349	0	0	.
chr16:3358615-3358616	cg07622547	0.000263015	-0.327171	0	0	ZNF75A,LA16c-360H6.3,LA16c-360H6.2	31,4,4
chr15:42750462-42750463	cg17395184	0.000265539	0.327098	0	0	ZNF106	40
chr17:74523449-74523450	cg21935511	0.000265578	-0.327038	0	0	CYGB,PRCD	51.52
chr1:77711859-77711860	cg05948962	0.000265629	-0.326926	0	0	.
chr7:5822101-5822102	cg21310094	0.000266439	0.322316	0	0	RNF216	85
chr17:78537708-78537709	cg18004067	0.00026662	-0.325183	0	0	RPTOR	555
chr11:126872863-126872864	cg17273911	0.000267406	-0.326663	0	0	KIRREL3-AS3,AP002833.1,KIRREL3	15,11,185
chr7:6576558-6576559	cg24488099	0.00026927	-0.326437	0	0	GRID2IP	62
chr11:67418213-67418214	cg00350199	0.000271404	-0.317632	0	0	ACY3	20
chr18:15331094-15331095	cg13625045	0.000277004	0.325744	0	1	AP005901.1	9
chr12:120740050-120740051	cg04118464	0.000277215	-0.324643	0	0	SIRT4	14
chr12:7339716-7339717	cg18958591	0.000277709	0.325528	0	1	RP11-273B20.3	28
chr4:139009110-139009111	cg20519044	0.000280634	0.325561	0	0	LINC00616,SLC7A11-AS1	33.27
chr3:29480979-29480980	cg13489922	0.000280847	0.324675	0	0	RBMS3	90
chr10:86959737-86959738	cg02399415	0.000282498	-0.324047	1	0	.
chr18:9717404-9717405	cg04995615	0.000287011	-0.322817	0	0	RAB31	79
chr17:36720896-36720897	cg16043820	0.000287992	-0.325194	0	0	SRCIN1	74
chr22:20255653-20255654	cg14069736	0.000288582	-0.32525	0	1	RTN4R	42
chr11:134027983-134027984	cg24178926	0.000288841	0.324777	0	0	NCAPD3	57
chr5:172640615-172640616	cg13021417	0.000289173	0.323423	0	1	.
chr6:71791006-71791007	cg10817669	0.000296069	-0.324104	0	0	.
chr11:1800837-1800838	cg03568769	0.000299776	0.324365	0	0	AC068580.7	6
chr8:47145556-47145557	cg08116998	0.000300797	0.32433	0	0	.
chr6:42691466-42691467	cg13348519	0.000302974	-0.322387	0	0	PRPH2	16
chr10:134997342-134997343	cg18139178	0.000303681	0.322217	0	0	KNDC1	149
chr20:443653-443654	cg15042888	0.000309459	0.319886	0	0	TBC1D20	27
chr6:30180759-30180760	cg26146731	0.000309536	-0.322984	0	0	TRIM26	195
chr7:143078637-143078638	cg07677396	0.000309854	0.322949	0	0	AC093673.5,ZYX	19.3
chr10:97825665-97825666	cg22767925	0.000311717	0.32359	0	0	ENTPD1-AS1	110
chr11:45792923-45792924	cg13654391	0.000312878	-0.322619	0	0	CTD-2210P24.4	11
chr17:72889973-72889974	cg01202197	0.000315466	-0.323196	0	0	FADS6	26
chr17:7146254-7146255	cg11209279	0.000315882	0.322251	0	0	CTD-2545G14.7,GABARAP	30.28
chr13:51970797-51970798	cg05008632	0.000317965	-0.322009	0	0	INTS6	60
chr2:132919865-132919866	cg22923398	0.000318175	0.321756	0	0	ANKRD30BL	33
chr6:134158982-134158983	cg15415259	0.000318581	-0.323116	0	0	RP4-662A9.2,RP3-323P13.2	17.94
chr22:25617229-25617230	cg17504145	0.000318716	-0.321951	0	0	CRYBB2	20
chr15:25490587-25490588	cg27062116	0.000320873	0.322334	0	0	SNORD115-41,SNHG14	5.509
chr8:56677752-56677753	cg22525251	0.000320922	0.322829	0	0	TMEM68	41
chr9:99449050-99449051	cg13365030	0.000322371	-0.322774	0	0	RP11-535M15.1	13
chr4:190909579-190909580	cg18242521	0.000323222	0.322768	0	0	.
chr2:133363326-133363327	cg09648243	0.000324396	0.322013	0	0	GPR39	56
chr9:35676056-35676057	cg10160081	0.000324891	0.321457	0	0	CA9,ARHGEF39	18.29
chr21:38128060-38128061	cg02525172	0.000327805	0.32091	0	0	HLCS	90
chr5:158889317-158889318	cg23075569	0.0003285	-0.322242	0	0	AC008703.1	14
chr1:145438435-145438436	cg22690212	0.000330946	-0.322286	0	0	TXNIP	23
chr1:17420539-17420540	cg11885355	0.000333828	-0.316841	0	0	PADI2	45
chr17:42081810-42081811	cg07739179	0.000335276	-0.321998	0	0	NAGS,PYY	27.52
chr6:26034145-26034146	cg19430897	0.000335868	0.321607	0	0	HIST1H2AB	14
chr11:64115133-64115134	cg26707686	0.000336028	-0.320596	0	0	CCDC88B	46
chr4:167941726-167941727	cg23488611	0.00034037	-0.321648	0	0	SPOCK3	45
chr1:155084807-155084808	cg23600475	0.000346017	-0.321232	0	0	.
chr14:75389200-75389201	cg18664866	0.000346111	0.320419	0	0	RPS6KL1	32
chr9:136694260-136694261	cg23828375	0.000349109	-0.318289	0	0	VAV2	152
chr14:72046272-72046273	cg21980137	0.000349383	-0.320927	0	0	SIPA1L1	149
chr10:90146079-90146080	cg21235018	0.000350322	0.321007	0	0	RNLS	81
chr9:18770966-18770967	cg13883376	0.000351218	-0.320159	0	0	ADAMTSL1	58
chr6:44923583-44923584	cg09479822	0.000352425	-0.318127	0	0	SUPT3H	69
chr7:17598868-17598869	cg26938379	0.00035251	-0.31878	0	0	AC017060.1	20
chr2:15575749-15575750	cg07255004	0.000353955	0.319814	0	0	NBAS	67
chr12:6359376-6359377	cg15669090	0.000363733	-0.320105	0	0	.
chr3:30512797-30512798	cg20207327	0.000364338	-0.320122	0	0	.
chr15:70390233-70390234	cg13637733	0.000364432	0.319311	0	0	TLE3	73
chr3:64238132-64238133	cg09093291	0.000364771	-0.320103	0	0	PRICKLE2	127
chr17:10675906-10675907	cg22272641	0.000365096	-0.320098	0	0	CTC-297N7.5	31
chr2:64490535-64490536	cg23810970	0.000366473	-0.319976	0	0	.
chr16:65265491-65265492	cg06060244	0.000368303	0.319324	1	1	RP11-256I9.2,RP11-256I9.3	11.22
chr1:17446768-17446769	cg18879300	0.000369272	-0.319759	0	0	PADI2	45
chr20:42711886-42711887	cg21062701	0.000371134	-0.319569	0	0	.
chr1:50447374-50447375	cg26915617	0.00037264	0.318239	0	0	AL645730.1,AGBL4	3.133
chr19:22715300-22715301	cg08837627	0.000372861	0.319592	0	0	CTC-457E21.2,ZNF98	5.29
chr20:55096558-55096559	cg10087910	0.000372903	0.31956	0	1	AL109806.1,GCNT7,FAM209A	1,23,16
chr17:3722395-3722396	cg13038895	0.000374331	-0.319024	0	0	C17orf85	27
chr1:174565337-174565338	cg16016766	0.000374386	0.319422	0	1	RABGAP1L	139
chr3:44596512-44596513	cg03795847	0.00037471	-0.314664	0	0	ZKSCAN7	34
chr16:29874803-29874804	cg05016401	0.0003748	0.317999	0	0	CDIPT,CDIPT-AS1	27.24
chr1:160068529-160068530	cg19944463	0.000377491	-0.316191	0	0	IGSF8	27
chr4:76373607-76373608	cg19532617	0.000377973	0.318834	0	1	.
chr2:86667436-86667437	cg02499104	0.000378139	0.315249	0	0	KDM3A	39
chr3:49193200-49193201	cg23181311	0.000378167	0.319156	0	0	RP11-694I15.7	8
chr9:129327236-129327237	cg04227973	0.000378909	-0.31682	0	0	.
chr3:9005400-9005401	cg01884537	0.00037973	-0.319164	0	0	RAD18	43
chr1:86822092-86822093	cg24551777	0.000387433	0.318251	0	0	ODF2L	27
chr12:32892732-32892733	cg14757462	0.000387549	0.318655	0	0	DNM1L,YARS2	28.25
chr7:99933797-99933798	cg18342832	0.000387842	0.31608	0	0	PMS2P1,STAG3L5P,STAG3L5P-PVRIG2P-PILRB,PILRB	20,23,49,48
chrX:19690551-19690552	cg23054861	0.000388172	-0.318711	0	0	SH3KBP1	104
chr17:48292685-48292686	cg24616862	0.000389723	0.301235	0	0	RP11-893F2.15,RP11-893F2.6	7.5
chr22:31687698-31687699	cg03065202	0.000390302	0.31791	0	0	PIK3IP1,RP3-400N23.6	23.3
chr8:140209154-140209155	cg11327831	0.000392102	-0.311439	0	0	.
chr1:247279205-247279206	cg03196666	0.000392504	0.316998	0	0	.
chr8:42401493-42401494	cg08080914	0.00039567	0.314686	0	0	SMIM19	31
chr13:33860056-33860057	cg26049501	0.000397774	-0.318182	0	0	STARD13	120
chr7:100760410-100760411	cg17679456	0.000398789	-0.315322	0	0	.
chr19:2248302-2248303	cg27662093	0.000400788	0.318007	0	0	AMH,SF3A2	19.34
chr2:112676753-112676754	cg05397534	0.000400947	-0.317239	0	0	MERTK	35
chr1:53926227-53926228	cg07598331	0.000401514	0.317557	0	0	DMRTB1	26
chr7:36364854-36364855	cg03182584	0.000408147	-0.317606	0	0	KIAA0895	43
chr17:42643755-42643756	cg04879123	0.000408173	0.316998	0	0	.
chr11:115374739-115374740	cg10043753	0.000409824	0.316123	0	0	CADM1	105
chr5:115864207-115864208	cg03820120	0.000414079	0.313855	0	0	SEMA6A	91
chr10:74250300-74250301	cg02501544	0.000415354	-0.316285	0	0	MICU1	47
chr1:114472203-114472204	cg09238756	0.000415485	-0.317099	0	0	RP5-1073O3.7,HIPK1	23.46
chr21:40259639-40259640	cg13071916	0.000415597	0.317198	0	0	AF064858.6,AP001043.1	36.8
chr1:23746677-23746678	cg27183435	0.000419566	-0.316971	0	0	TCEA3	31
chr3:99254613-99254614	cg11249082	0.000419897	0.315426	0	0	.
chr7:100139917-100139918	cg13695383	0.000420725	0.316701	0	0	AGFG2	23
chr21:45730731-45730732	cg15829622	0.000421741	0.316545	0	0	PFKL	43
chr21:44198080-44198081	cg20741235	0.000424397	0.314473	1	0	.
chr6:36210644-36210645	cg03726060	0.00042614	0.312977	0	0	PNPLA1	33
chr16:15226854-15226855	cg26169056	0.000428547	0.316135	0	1	PKD1P6,PDXDC1,NPIPP1,RP11-1186N24.5	29,97,8,8
chr7:1821413-1821414	cg09312041	0.000428938	-0.315988	0	0	AC074389.1	1
chr19:3982749-3982750	cg06951383	0.000429042	0.316312	0	0	SNORD37,EEF2	11.37
chr1:119259526-119259527	cg07718535	0.000429531	-0.312912	0	0	.
chr2:139132471-139132472	cg11563784	0.000433782	-0.314743	1	0	.
chr11:65150871-65150872	cg04261607	0.000435062	0.315657	0	0	SLC25A45	26
chr11:50227199-50227200	cg01615475	0.000435829	0.316038	0	0	RP11-347H15.2	6
chr21:43579962-43579963	cg18277671	0.00043706	-0.313466	0	0	.
chr15:42114841-42114842	cg18458000	0.000437294	-0.314071	0	0	MAPKBP1	41
chr6:70573798-70573799	cg04092581	0.000437438	-0.314197	0	0	.
chr1:226064048-226064049	cg17125583	0.000437815	0.315935	0	0	TMEM63A	47
chr3:51909628-51909629	cg11857626	0.000438324	-0.315738	0	0	IQCF5-AS1,IQCF5	9.11
chr15:78380342-78380343	cg17168057	0.000438539	-0.31598	0	0	SH2D7	37
chr10:132887552-132887553	cg12317856	0.00043899	-0.315921	0	0	.
chr16:10179771-10179772	cg04675204	0.000442363	0.315519	0	0	GRIN2A	99
chr2:148682423-148682424	cg11453792	0.000443238	0.31408	0	0	ACVR2A	35
chr4:88741369-88741370	cg02820041	0.000443969	0.315355	0	1	MEPE	20
chr9:36912714-36912715	cg10193836	0.000444258	-0.315688	0	0	PAX5	106
chr11:6255951-6255952	cg26002955	0.000444283	0.31567	0	0	FAM160A2,CNGA4	28.3
chr15:89010657-89010658	cg24424609	0.000445312	0.315631	0	0	MRPL46,RP11-97O12.7,MRPS11	26,43,26
chr6:35772961-35772962	cg23929834	0.000446702	-0.314949	0	0	LHFPL5	21
chr1:48045348-48045349	cg15431844	0.00044684	-0.285527	0	0	.
chr17:68030429-68030430	cg18922941	0.000447021	-0.315524	0	0	AC002539.1	41
chr17:66458055-66458056	cg17335108	0.000447378	-0.314859	0	0	RP11-120M18.2	69
chr5:154258779-154258780	cg01580696	0.000447576	0.315224	0	1	.
chr6:134785935-134785936	cg08073096	0.00044796	0.314587	0	0	RP11-557H15.3,LINC01010	30.23
chr15:41885247-41885248	cg15682099	0.000448065	0.315365	0	1	.
chr1:155280483-155280484	cg12025673	0.000448373	0.31067	0	0	FDPS	31
chr14:76892422-76892423	cg13720700	0.000453197	-0.313527	0	0	ESRRB	107
chr4:4173497-4173498	cg12464148	0.000457855	0.314677	0	1	.
chr11:70952555-70952556	cg02389631	0.000459116	-0.313007	0	0	SHANK2	518
chr2:63427680-63427681	cg06965391	0.000459237	0.314677	0	1	WDPCP	113
chr13:78090688-78090689	cg17675992	0.000460389	-0.314595	0	0	.
chr17:1011493-1011494	cg17208740	0.000461535	0.313878	0	0	ABR	343
chr2:29319945-29319946	cg05075112	0.000462268	-0.314293	0	0	AC105398.3,CLIP4	11.58
chr15:75651821-75651822	cg17087232	0.000462619	0.314564	0	0	MAN2C1	37
chr1:78503815-78503816	cg26329328	0.000462686	0.314693	0	0	GIPC2	66
chr11:2292691-2292692	cg07333715	0.000463196	-0.31447	0	0	ASCL2	45
chr20:57209280-57209281	cg04033396	0.000465569	-0.31433	0	0	MGC4294	1
chr7:128853885-128853886	cg13885652	0.000467947	-0.313288	0	0	RP11-286H14.8	5
chr3:125551382-125551383	cg24353151	0.000468152	-0.314012	1	1	AC092902.1,RP11-379B18.5	5.19
chr13:42006954-42006955	cg08287887	0.000469458	0.314372	0	0	OR7E36P	1
chrX:65238507-65238508	cg06701191	0.000471271	-0.31435	0	0	MIR223	3
chr19:40806021-40806022	cg05774117	0.000472454	-0.311764	0	0	RNU6-945P	3
chr20:32320679-32320680	cg17627967	0.000475239	-0.313649	0	0	RP4-553F4.2,ZNF341	14.25
chr20:46392458-46392459	cg14780310	0.000476195	-0.314024	0	0	SULF2	93
chr7:44485467-44485468	cg11121865	0.00047622	0.313665	0	0	NUDCD3	44
chr7:102388091-102388092	cg07071464	0.000476436	-0.313682	0	0	FAM185A	22
chr12:132952608-132952609	cg00833080	0.000478563	-0.313007	0	0	.
chr14:71832156-71832157	cg12946891	0.000481386	-0.313845	0	0	SIPA1L1	149
chr7:2165490-2165491	cg19146587	0.000481415	0.31338	0	0	MAD1L1	820
chr2:29223113-29223114	cg09113310	0.000482233	-0.311552	0	0	FAM179A	47
chr6:106161642-106161643	cg23091339	0.000482992	0.313603	0	0	.
chr12:93966317-93966318	cg11225410	0.000485823	0.31195	0	0	SOCS2-AS1,SOCS2	55.6
chr12:109115181-109115182	cg04488207	0.000487724	0.31341	0	0	CORO1C	72
chr10:95391101-95391102	cg06948208	0.000488046	-0.31355	0	0	PDE6C	16
chr19:9957544-9957545	cg20363171	0.000488387	-0.305587	0	0	PIN1	24
chr3:129312406-129312407	cg07718382	0.000489186	-0.311518	0	0	PLXND1	66
chr16:67204807-67204808	cg26783727	0.000489936	-0.31299	0	0	NOL3	27
chr2:37543566-37543567	cg14800082	0.000490329	0.313439	0	0	PRKD3	34
chr7:76038785-76038786	cg13594711	0.000490442	-0.313442	0	0	ZP3,SRCRB4D	42.35
chr15:44120022-44120023	cg16494108	0.000491363	0.313277	0	0	WDR76	21
chr4:492965-492966	cg15884721	0.000491398	0.312023	1	0	ZNF721,PIGG	33.81
chr15:45431690-45431691	cg14377152	0.000492231	0.313183	0	0	DUOX1	52
chr11:67417958-67417959	cg11096993	0.000496244	-0.306193	0	0	ACY3	20
chr1:155115737-155115738	cg15417427	0.000499471	-0.310589	0	0	RNU7-150P	6
chr1:205038785-205038786	cg01243924	0.000501108	-0.31292	0	0	CNTN2	48
chr17:16881352-16881353	cg03557270	0.000502598	-0.312342	0	0	AC104024.1	11
chr10:112887550-112887551	cg08715613	0.000503444	-0.310465	1	0	.
chr1:154128443-154128444	cg15280238	0.000507392	0.312373	0	0	NUP210L,TPM3	32.42
chr2:9878816-9878817	cg27291468	0.000508208	-0.31246	0	0	.
chr19:49177693-49177694	cg07051648	0.000512168	0.312004	1	0	NTN5,SEC1P	21.61
chr14:22993036-22993037	cg10414881	0.000512558	-0.310039	0	0	TRAJ20,TRAJ19	7.5
chr17:45922479-45922480	cg26888147	0.000515693	-0.310975	0	0	SP6	31
chr16:10711296-10711297	cg27409771	0.00051713	-0.312203	0	0	.
chr1:36906600-36906601	cg18912897	0.000517308	-0.30848	0	0	OSCP1	36
chr1:202135771-202135772	cg17255817	0.000519961	-0.310901	0	0	PTPRVP	12
chr14:74421947-74421948	cg12599174	0.000520302	0.310484	0	0	COQ6	36
chr17:46688419-46688420	cg11149743	0.000520605	-0.312005	0	0	HOXB7	106
chr10:79110881-79110882	cg04308589	0.0005209	-0.310486	0	0	KCNMA1	243
chr4:174422908-174422909	cg08125755	0.000522672	0.309845	0	0	.
chr21:33976522-33976523	cg17739287	0.000523847	0.311934	0	0	AP000275.65,C21orf59	46.33
chr7:32742814-32742815	cg04941236	0.00052483	0.311784	0	1	AVL9,DPY19L1P1	184.44
chr11:64579163-64579164	cg09343150	0.000527317	-0.311534	0	0	MEN1	31
chrX:19688787-19688788	cg01780699	0.000527542	-0.309622	0	0	SH3KBP1	104
chr3:140866589-140866590	cg08158518	0.00052936	-0.310267	0	0	SPSB4	70
chr7:2300803-2300804	cg02698362	0.000533455	0.311429	0	0	SNX8	111
chr4:169402304-169402305	cg20031662	0.000535598	-0.311347	0	0	DDX60L	52
chr13:29598006-29598007	cg23433307	0.000536136	-0.311266	0	0	MTUS2	99
chr7:19157420-19157421	cg10420952	0.000536651	-0.311347	0	0	TWIST1	63
chr11:48922035-48922036	cg04936639	0.000539158	0.311046	0	1	RP11-56P9.10	9
chr4:187029759-187029760	cg08683856	0.000543433	-0.310158	0	0	FAM149A	67
chr5:10513925-10513926	cg16042099	0.000544678	-0.309414	0	0	RP11-1C1.5	15
chr13:96569138-96569139	cg02248900	0.000545133	-0.310979	0	0	UGGT2	42
chr11:94473405-94473406	cg22911898	0.000551966	-0.310311	0	0	AMOTL1,RP11-867G2.8	91.77
chr1:6526129-6526130	cg10059687	0.000552388	0.30811	0	0	TNFRSF25	24
chr19:44259148-44259149	cg23525514	0.000552401	-0.308788	0	0	SMG9	27
chr1:48137147-48137148	cg06523144	0.000553969	0.310417	0	0	.
chr11:81697779-81697780	cg25405719	0.00055652	0.310007	0	1	RP11-876F14.1,RP11-179A16.1	5.54
chr21:46883912-46883913	cg00925436	0.000556829	-0.310216	0	0	COL18A1	154
chr12:5750600-5750601	cg17111016	0.00055707	0.309875	0	0	ANO2	88
chr21:34739816-34739817	cg07284373	0.000557416	0.308253	0	0	.
chr6:25883715-25883716	cg19487465	0.000559018	0.310376	0	0	HIST1H2APS2,SLC17A3	9.22
chr14:34965789-34965790	cg08272457	0.000559785	-0.309732	0	0	.
chr11:74307859-74307860	cg21048411	0.000561241	0.310332	1	0	POLD3	61
chr5:16428521-16428522	cg20338478	0.000562388	-0.310212	0	0	RP1-167G20.2,RP1-167G20.1	8.14
chr7:1478727-1478728	cg05999604	0.000564183	0.309594	0	0	MICALL2	62
chr4:6109703-6109704	cg15633777	0.00056691	-0.309631	0	0	JAKMIP1	101
chr22:20639089-20639090	cg14841838	0.00056763	0.310052	0	0	AC011718.2	6
chr17:79630153-79630154	cg12920851	0.000572535	-0.306595	0	0	PDE6G	22
chr2:174397742-174397743	cg18824501	0.000576281	0.309397	0	1	.
chr7:5271480-5271481	cg26660312	0.000576452	0.305232	0	0	WIPI2	73
chr1:163126440-163126441	cg15026820	0.000579184	-0.306962	0	0	RGS5	51
chr2:44057002-44057003	cg04973837	0.000584551	-0.309298	0	0	ABCG5	34
chr15:35312744-35312745	cg17212314	0.00058494	-0.308951	0	0	.
chr17:19969749-19969750	cg19583438	0.000588041	0.308849	0	0	SPECC1	126
chr14:105676791-105676792	cg11172332	0.000589501	0.307882	1	0	BRF1	165
chr11:61129680-61129681	cg11126485	0.000589724	-0.309183	0	0	CYB561A3,TMEM138	34.31
chr20:47191587-47191588	cg26269170	0.000589726	0.308531	0	0	.
chr19:2393342-2393343	cg04009144	0.000592281	-0.30905	0	1	TMPRSS9	28
chr11:50227079-50227080	cg24480765	0.000592315	0.308872	0	0	RP11-347H15.2	6
chr18:11908153-11908154	cg01171264	0.000594196	0.309023	0	0	RP11-820I16.4,MPPE1	16.25
chr10:38743472-38743473	cg02904945	0.000594867	0.308668	0	1	CICP9,RP11-291L22.4	1.3
chr15:52876096-52876097	cg01793301	0.000595077	0.30863	0	0	RP11-23N2.4,FAM214A	8.42
chr19:57349815-57349816	cg19771589	0.000597842	0.307908	0	0	ZIM2,PEG3	64.55
chr11:130271767-130271768	cg15307777	0.000598295	-0.307875	0	0	.
chr20:37046387-37046388	cg23466226	0.000598748	0.308783	0	0	RP4-564F22.5	3
chr16:12072554-12072555	cg00478870	0.000600463	-0.307315	0	0	RP11-166B2.7,SNX29	9.257
chr11:121440892-121440893	cg15241519	0.000600692	-0.308767	0	0	SORL1	99
chr2:26542627-26542628	cg24963286	0.000601979	0.308263	0	0	GPR113,EPT1	42.5
chr11:117564580-117564581	cg00925393	0.000602355	-0.308706	1	0	DSCAML1	200
chr17:1677229-1677230	cg16121525	0.000602731	-0.308487	0	0	SERPINF1	26
chr3:167813480-167813481	cg15671498	0.000606508	0.30565	0	0	GOLIM4	35
chr12:131438283-131438284	cg01353907	0.000606613	-0.308508	0	0	GPR133	236
chr2:178976361-178976362	cg19194448	0.000607291	0.308039	0	0	RBM45	21
chr11:110067287-110067288	cg21384131	0.000608213	-0.306307	0	0	RDX	45
chr11:32451461-32451462	cg20989480	0.000608516	0.308285	0	0	WT1	84
chr11:64692064-64692065	cg08285383	0.000608882	0.307396	0	0	PPP2R5B	32
chr21:46266030-46266031	cg16087101	0.000608894	-0.308217	0	0	.
chr18:21017847-21017848	cg03867274	0.000610028	-0.308034	0	0	TMEM241	72
chr3:183145478-183145479	cg25737410	0.000612248	0.287665	0	0	MCF2L2	129
chr7:4837937-4837938	cg22272277	0.000613062	-0.308301	0	0	RADIL	143
chr11:2907061-2907062	cg20492951	0.000616095	0.308082	0	0	CDKN1C	41
chr14:81610002-81610003	cg24160582	0.000617977	-0.305035	0	0	RP11-114N19.3,TSHR	18.4
chr19:3250840-3250841	cg09453398	0.000618277	0.307193	0	1	CELF5	56
chr12:110149962-110149963	cg05635036	0.00061857	-0.307681	0	0	.
chr4:99917024-99917025	cg15381708	0.000618953	0.3079	0	0	METAP1	37
chr3:107416903-107416904	cg01135961	0.000621985	0.30792	0	1	BBX	72
chr16:46489157-46489158	cg05103956	0.000621995	0.307909	0	1	.
chr20:30102855-30102856	cg04803921	0.000622948	-0.307726	0	0	HM13	51
chr6:137816901-137816902	cg26672688	0.000623308	0.305235	0	0	OLIG3	19
chr21:45176069-45176070	cg23702614	0.000623754	0.307032	0	0	PDXK	68
chr10:112641196-112641197	cg05506314	0.000626595	-0.305572	0	0	PDCD4	32
chr9:135459387-135459388	cg15033348	0.000627065	-0.307615	0	0	BARHL1	25
chr12:106976624-106976625	cg03960951	0.000636189	-0.307357	0	0	RFX4,RP11-144F15.1	84.119
chr15:42782694-42782695	cg17582199	0.000636578	0.307422	0	0	SNAP23,ZNF106	47.4
chr14:64471408-64471409	cg26181869	0.000638622	0.304758	1	0	SYNE2	144
chr19:30227885-30227886	cg11391451	0.000641265	0.305052	0	0	.
chr2:465172-465173	cg20647799	0.000641751	-0.30699	0	0	.
chr17:50921342-50921343	cg10520303	0.000641913	-0.307031	0	0	.
chr15:42785639-42785640	cg04373893	0.00064244	0.307148	0	0	SNAP23	47
chr10:88228103-88228104	cg00142999	0.000642456	0.306736	0	0	WAPAL	37
chr20:57426570-57426571	cg06693667	0.000643282	0.306175	0	0	GNAS,GNAS-AS1	213.92
chr12:111874281-111874282	cg01831767	0.000644969	0.30712	0	0	SH2B3	47
chr18:20911360-20911361	cg01962300	0.000646305	0.306556	0	0	TMEM241	72
chr9:34310183-34310184	cg16952631	0.000649777	0.30682	0	0	KIF24	37
chr9:101754691-101754692	cg13963221	0.000650574	0.305146	0	1	COL15A1	49
chr12:103980017-103980018	cg23227824	0.000650882	0.306577	0	0	STAB2	42
chr3:12623846-12623847	cg05968091	0.00065147	0.306504	0	0	MKRN2	24
chr5:133838091-133838092	cg08805149	0.000652607	-0.305581	0	0	.
chr11:1311540-1311541	cg13768347	0.000655461	-0.30583	0	0	TOLLIP	120
chr10:45455421-45455422	cg02841844	0.000657186	0.270214	0	0	RP11-285G1.14,TMEM72-AS1,RASSF4	12,84,58
chr11:66225293-66225294	cg23395228	0.000658869	0.306585	0	1	MRPL11	41
chr21:39852226-39852227	cg02790096	0.000667934	-0.305749	0	0	ERG	82
chr11:46260204-46260205	cg26296119	0.000668668	-0.306235	0	0	CTD-2589M5.5	11
chr6:31690170-31690171	cg10276506	0.000672779	0.306015	0	0	C6orf25,LY6G6C	57.19
chr17:74069707-74069708	cg12352315	0.000672781	-0.304781	0	0	ZACN,GALR2,SRP68	43,15,38
chr12:124788698-124788699	cg01656620	0.00067311	-0.305879	0	0	FAM101A	180
chr11:82867375-82867376	cg09076770	0.00067459	-0.30402	0	0	PCF11	17
chr1:165171672-165171673	cg22852353	0.000674775	0.305967	1	0	LMX1A	82
chr1:109633214-109633215	cg13186846	0.000676933	-0.305828	0	0	RP5-1065J22.8,TMEM167B	14.16
chr6:155055665-155055666	cg04908280	0.000681756	-0.305282	0	0	SCAF8	39
chr19:49957206-49957207	cg02454464	0.000682018	-0.304375	0	0	PIH1D1,ALDH16A1	22.31
chr6:11497246-11497247	cg13664331	0.000682313	-0.304498	1	0	RP11-716O23.2	11
chr12:53682969-53682970	cg04065151	0.000685467	0.305421	0	0	ESPL1	21
chr8:99999681-99999682	cg24326075	0.000686203	0.304813	0	0	.
chr1:41726393-41726394	cg03890209	0.000687705	0.305396	0	0	RP11-399E6.1	25
chr1:38514267-38514268	cg03030665	0.000690968	0.304583	0	0	RP5-884C9.2	50
chr11:117845466-117845467	cg04477293	0.00069125	-0.304781	0	0	.
chr10:15646404-15646405	cg21597036	0.000691772	-0.304368	0	0	ITGA8	43
chr17:60783200-60783201	cg22796355	0.000691904	-0.304456	0	0	RP11-156L14.1,MARCH10	27.75
chr4:30095297-30095298	cg09132944	0.000693861	-0.30536	0	0	.
chr2:207147089-207147090	cg12820627	0.000694845	0.304872	0	0	ZDBF2	20
chr10:67651797-67651798	cg13701012	0.000695385	-0.305264	0	0	.
chr19:2607850-2607851	cg22459924	0.000697473	-0.304723	0	0	GNG7	200
chr1:94929484-94929485	cg26908356	0.000699326	0.305217	1	0	ABCD3	24
chr1:6296337-6296338	cg27541349	0.00070079	-0.303977	0	0	LINC00337,ICMT	18.28
[truncated: 7,324 more rows]

## Sheet: Table S9
Table S9: Phenotype associations for CpGs from baseline EWAS
[truncated: 143 more rows]
[truncated: 27 more columns]

[truncated: 1 more sheets: Table S10]
